# Supplementary material
Source: PubMed Central journal article supplement (PMC6858066)
Supplement: NIHMS1013898-supplement-Supporting_Information.pdf [file NIHMS1013898-supplement-Supporting_Information.pdf]

# Supporting Information: Modifications to the Aryl Group of dppf-Ligated Ni $\sigma$ -Aryl Precatalysts: Impact on Speciation and Catalytic Activity in Suzuki-Miyaura Coupling Reactions

Megan Mohadjer Beromi, Gourab Banerjee, Gary W. Brudvig, David J. Charboneau, Nilay Hazari,\* Hannah M. C. Lant, and Brandon Q. Mercado

The Department of Chemistry, Yale University, P. O. Box 208107, New Haven, Connecticut, 06520, USA. E-mail: [nilay.hazari@yale.edu](mailto:nilay.hazari@yale.edu).

## *Table of Contents*

|      |                                                                                       |
|------|---------------------------------------------------------------------------------------|
| S2   | <i>SI. General Methods</i>                                                            |
| S3   | <i>SII. Synthesis of Precatalysts</i>                                                 |
| S12  | <i>SIII. Analysis of Catalyst Speciation In Situ Via EPR Spectroscopy</i>             |
| S15  | <i>SIV. Catalytic Performance of Precatalysts</i>                                     |
| S17  | <i>SV. Correlation of Catalytic Results to % Buried Volume and Hammett Parameters</i> |
| S24  | <i>SVI. NMR Spectra</i>                                                               |
| S48  | <i>SVII. X-ray Diffraction Data</i>                                                   |
| S139 | <i>SVIII. References</i>                                                              |

## SI. General Methods

Experiments were performed under an atmosphere of dinitrogen in an M-Braun glovebox or using standard Schlenk techniques, unless specified otherwise. Purging of the glovebox atmosphere was not performed between uses of pentane, benzene, toluene, diethyl ether, and THF; as such, trace amounts of the solvents may have been present in the box atmosphere and intermixed in the solvent bottles. All chemicals were used as received unless otherwise stated. Air- or moisture-sensitive liquids were transferred using stainless steel cannulae on a Schlenk line or in a glovebox. Solvents were dried via passage through a column of activated alumina and subsequently stored under dinitrogen. Deuterated solvents were obtained from Cambridge Isotope Laboratories. Powdered  $\text{K}_3\text{PO}_4$  was purchased from Acros Organics, finely ground using a mortar and pestle, heated in an oven at 120 °C for at least 24 hours and stored in a glove box. NMR spectra were recorded on Agilent-400, -500 or -600 MHz spectrometers at ambient probe temperatures unless otherwise stated. Chemical shifts are reported in ppm, with respect to residual internal protio solvent for  $^1\text{H}$  and  $^{13}\text{C}$  NMR spectra and  $^{31}\text{P}\{^1\text{H}\}$  NMR spectra are referenced via the  $^1\text{H}$  resonances based on the relative gyromagnetic ratios<sup>1</sup>. Gas Chromatography was performed on a ThermoFisher Trace 1300 GC apparatus equipped with a flame ionization detector and a Supelco fused silica capillary column (5 Å molecular sieves, 30 m x 0.53 mm) using the following parameters: flow rate 1.23 mL/min constant flow, column temperature 50 °C (held for 5 min), 20 °C/min increase to 300 °C (held for 5 min), total time 22.5 min. GC yields were calculated based on calibration curves generated using the independently synthesized biaryl product of interest. Naphthalen-1-yl sulfamate and 4-trifluoromethylphenyl sulfamate were prepared according to literature procedures.<sup>2</sup> **1-Cl**,<sup>3</sup> **1-Br**,<sup>3</sup> (dppf)Ni<sup>II</sup>(2,4,6-triisopropylphenyl)(Br) (**16**)<sup>4</sup> and (dppf)Ni<sup>0</sup>(C<sub>2</sub>H<sub>4</sub>) (**18**)<sup>5</sup> were prepared according to literature precedent. X-Band EPR spectra were recorded on a Bruker ELEXSYS E500 EPR spectrometer equipped with a SHQ resonator and an Oxford ESR-900 helium-flow cryostat with the following settings: microwave frequency, 9.4 GHz; modulation frequency, 100 kHz; modulation amplitude, 10 G; sweep time, 84 s; conversion time, 41 ms; time constant 20 ms. 1 mM solutions of the samples of interest were prepared in the glovebox using toluene for a total of 200 µL of solution per tube. The tubes were sealed in the glovebox and immediately frozen in liquid nitrogen. Robertson Microlit Laboratories, Inc. performed the elemental analyses (inert atmosphere).

## SII. Synthesis of Precatalysts

### *General Procedure for the Synthesis of Ni(II) Precatalysts*

The compounds were synthesized by modification of the previously described literature method for the preparation of (dppf)Ni<sup>II</sup>(*o*-tolyl)(Br) (**1-Br**) in all cases except (dppf)Ni<sup>II</sup>(2-Me-4-NO<sub>2</sub>Ph)(Br) (**7**), whose synthesis is detailed with its reported spectroscopic data.<sup>3,4</sup> (dppf)Ni<sup>II</sup>Br<sub>2</sub> (**17**) (200 mg, 0.258 mmol) was added to a 100 mL Schlenk flask containing a stir bar. 10 mL of THF was transferred via cannula into the flask, and the contents were stirred until dissolution. The flask was cooled to 0 °C in an ice bath, after which the appropriate arylmagnesium bromide Grignard reagent (0.258 mmol) was added dropwise using a gas-tight syringe. The solutions turned from dark green to orange in all cases by the end of the addition. The flask was allowed to warm to room temperature, after which the THF was removed under vacuum to yield an orange residue. 5 mL of methanol was added to the flask, and the heterogeneous mixture was sonicated for 3 minutes until a uniform suspension was obtained. The flask was cooled in an ice bath for 15 minutes, and the resulting bright yellow solid was isolated by vacuum filtration and analyzed by <sup>1</sup>H, <sup>31</sup>P, <sup>13</sup>C, and <sup>19</sup>F (if applicable) NMR spectroscopy. For fluorine-containing species, we note that <sup>1</sup>J, <sup>2</sup>J, and <sup>3</sup>J(C-F) couplings could not be resolved in the <sup>13</sup>C{<sup>1</sup>H} NMR spectra, in part because of the low solubility of the complexes, and as such, are not reported. Spectroscopic data is reported below.

### *Spectroscopic Data for (dppf)Ni<sup>II</sup>(1-naphthyl)(Br) (2)*

Yield: 64% (135.2 mg)

<sup>1</sup>H NMR (C<sub>6</sub>D<sub>6</sub>, 500 MHz, 25 °C): δ 9.53 (d, J = 7.2 Hz, 1H), 8.72 (t, J = 8.3 Hz, 2H), 8.32 (t, J = 7.2 Hz, 2H), 8.09 (br s, 1H), 7.91 (t, J = 4.5 Hz, 1H), 7.39 (t, J = 7.2 Hz, 1H), 7.24 (m, 4H, partially obscured by solvent), 7.10 (m, 2H, partially obscured by solvent), 6.97 (m, 2H), 6.86 (m, 3H), 6.57 (t, J = 6.7 Hz, 1H), 6.43 (t, J = 6.4 Hz, 2H), 5.33 (s, 1H), 4.26 (s, 1H), 4.16 (s, 1H), 3.88 (s, 1H), 3.65 (s, 1H), 3.60 (s, 1H), 3.59 (s, 1H), 3.44 (s, 1H). The NMR spectrum is shown in Figure S7.

<sup>31</sup>P{<sup>1</sup>H} NMR (C<sub>6</sub>D<sub>6</sub>, 202 MHz, 25 °C): δ 32.0 (d, J = 28 Hz); 11.8 (d, J = 28 Hz) The NMR spectrum is shown in Figure S8.

<sup>13</sup>C{<sup>1</sup>H} NMR (C<sub>6</sub>D<sub>6</sub>, 151 MHz, 25 °C): δ 140.1, 136.5, 136.1, 135.8, 135.5, 135.3, 134.7, 134.4, 134.1, 132.5, 131.7, 131.6, 131.5, 131.3, 131.1, 130.3, 130.0, 126.4, 124.8, 124.2, 123.4, 122.6,

77.1, 76.4, 76.1, 75.6, 74.6, 74.4, 74.3, 74.0, 74.0, 73.0, 72.4, 71.3. The NMR spectrum is shown in Figure S9.

Elemental Analysis: C<sub>44</sub>H<sub>35</sub>BrFeNiP<sub>2</sub> % Calc'd(Found): C: 64.44(64.57); H: 4.30(4.44); N: <0.02(<0.02).

*Spectroscopic Data for (dppf)Ni<sup>II</sup>(2-ethylphenyl)(Br) (3)*

Yield: 69% (141.4 mg)

<sup>1</sup>H NMR (C<sub>6</sub>D<sub>6</sub>, 500 MHz, 25 °C): δ 8.65 (t, J = 6.4 Hz, 2H), 8.37 (br s, 2 H), 8.28 (t, J = 7.7 Hz, 2H), 7.79 (t, J = 4.4 Hz, 1H), 7.21 (m, 4H, obscured by solvent), 6.98 (m, 3H), 6.76 (m, 4H), 6.68 (m, 3H), 6.52 (d, J = 5.2 Hz, 1H), 5.31 (s, 1H), 4.15 (s, 1H), 4.00 (s, 2H), 3.84 (s, 1H), 3.69 (s, 1H), 3.66 (s, 1H), 3.60 (s, 1H), 3.46 (s, 1H), 2.84 (s, 1H), 1.42 (t, J = 6.3 Hz, 3H). The NMR spectrum is shown in Figure S10.

<sup>31</sup>P{<sup>1</sup>H} NMR (C<sub>6</sub>D<sub>6</sub>, 202 MHz, 25 °C): δ 31.2 (d, 24 Hz), 11.0 (d, 26 Hz). The NMR spectrum is shown in Figure S11.

<sup>13</sup>C{<sup>1</sup>H} NMR (C<sub>6</sub>D<sub>6</sub>, 151 MHz, 25 °C): δ 136.8, 136.5, 135.8, 132.9, 131.6, 131.5, 131.4, 128.7, 128.4, 127.1, 126.8, 122.8, 75.4, 74.8, 74.7, 74.4, 74.0, 73.7, 73.6, 73.5, 73.4, 72.1, 70.9, 30.5, 14.1. The NMR spectrum is shown in Figure S12.

Elemental Analysis: C<sub>42</sub>H<sub>37</sub>BrFeNiP<sub>2</sub> % Calc'd(Found): C: 63.20(63.47); H: 4.67(4.45); N: <0.02(<0.02).

*Spectroscopic Data for (dppf)Ni<sup>II</sup>(2-trifluoromethylphenyl)(Br) (4)*

Yield: 63% (137.0 mg)

<sup>1</sup>H NMR (*d*<sub>8</sub>-toluene, 500 MHz, 25 °C): δ 8.64 (t, J = 8.3 Hz, 2H), 8.41 (br s, 1H), 8.36 (t, J = 8.8 Hz, 3H), 8.09 (t, J = 8.1 Hz, 1H), 7.22 (m, 3H, obscured by solvent), 7.12 (m, 1H), 6.99 (m, 4H), 6.78 (m, 2H), 6.66 (m, 3H), 6.45 (t, J = 6.5 Hz 1H), 5.50 (s, 1H), 4.16 (s, 1H), 4.02 (s, 1H), 3.84 (s, 1H), 3.62 (s, 1H), 3.58 (s, 1H), 3.52 (s, 1H), 3.40 (s, 1H). The NMR spectrum is shown in Figure S13.

<sup>31</sup>P{<sup>1</sup>H} NMR (C<sub>6</sub>D<sub>6</sub>, 202 MHz, 25 °C): δ 31.2 (dq, J = 36 Hz, 8 Hz), 13.0 (36 Hz). The NMR spectrum is shown in Figure S14.

<sup>13</sup>C{<sup>1</sup>H} NMR (C<sub>6</sub>D<sub>6</sub>, 151 MHz, 25 °C): δ 136.87, 136.79, 136.59, 136.52, 135.67, 135.60, 135.51, 135.49, 135.05, 134.43, 134.14, 134.11, 133.87, 133.04, 132.99, 132.74, 131.73, 130.83, 130.23, 130.19, 128.72, 128.56, 128.52, 128.49, 128.47, 128.35, 128.22, 128.16, 128.14, 128.06, 127.98,

127.90, 127.81, 127.73, 127.61, 127.22, 127.15, 121.99, 121.98, 77.47, 77.28, 77.15, 76.44, 76.19, 75.86, 75.84, 74.84, 74.78, 73.92, 73.85, 73.46, 73.43, 72.28, 72.26, 71.05, 71.03. The NMR spectrum is shown in Figure S15.

$^{19}\text{F}\{^1\text{H}\}$  NMR ( $\text{C}_6\text{D}_6$ , 470 MHz, 25 °C):  $\delta$  -56.9 (d,  $J$  = 8 Hz). The NMR spectrum is shown in Figure S16.

Elemental Analysis:  $\text{C}_{41}\text{H}_{32}\text{BrF}_3\text{FeNiP}_2$  % Calc'd(Found): C: 58.76(59.00); H: 3.85(4.01); N: <0.02(<0.02).

#### *Spectroscopic Data for (dppf)Ni<sup>II</sup>(2-methoxyphenyl)(Br) (5)*

Yield: 65% (133.6 mg)

$^1\text{H}$  NMR ( $\text{C}_6\text{D}_6$ , 500 MHz, 25 °C):  $\delta$  8.73 (t,  $J$  = 9.7 Hz, 2H), 8.46 (br s, 2H), 8.36 (t,  $J$  = 11.2 Hz, 2H), 7.56 (t,  $J$  = 6.1 Hz, 1H), 7.29 (m, obscured by solvent), 7.02 (m, 3H), 6.89 (m, 3H), 6.65 (m, 4H), 5.73 (s, 1H), 5.37 (s, 1H), 4.11 (s, 1H), 4.08 (s, 1H), 3.86 (s, 1H), 3.78 (s, 1H), 3.70 (s, 1H), 3.68 (s, 1H), 3.58 (s, 1H), 3.42 (s, 3H). The NMR spectrum is shown in Figure S17.

$^{31}\text{P}\{^1\text{H}\}$  NMR ( $\text{C}_6\text{D}_6$ , 202 MHz, 25 °C):  $\delta$  30.91 (d,  $J$  = 32 Hz), 10.14 (d,  $J$  = 34 Hz). The NMR spectrum is shown in Figure S18.

$^{13}\text{C}\{^1\text{H}\}$  NMR ( $\text{C}_6\text{D}_6$ , 126 MHz, 25 °C):  $\delta$  159.37, 139.90, 139.83, 139.69, 139.61, 136.05, 135.36, 134.06, 134.01, 133.97, 133.94, 133.88, 133.86, 133.81, 131.79, 131.73, 131.30, 131.28, 128.69, 128.66, 128.48, 128.44, 128.39, 128.35, 128.31, 128.17, 128.14, 127.98, 127.73, 127.61, 127.57, 114.61, 78.37, 77.68, 77.62, 74.79, 74.69, 74.63, 74.35, 74.35, 74.25, 73.63, 73.61, 73.58, 73.56, 73.50, 72.75, 72.72, 54.87. The NMR spectrum is shown in Figure S19.

Despite repeated attempts this species did not pass elemental analysis.

#### *Spectroscopic Data for (dppf)Ni<sup>II</sup>(2,4-xyllyl)(Br) (6)*

Yield: 52% (108 mg)

$^1\text{H}$  NMR ( $\text{C}_6\text{D}_6$ , 500 MHz, 25 °C):  $\delta$  8.66 (t,  $J$  = 6.8 Hz, 2H), 8.33 (br s, 1H), 8.26 (t,  $J$  = 9.2 Hz, 2H), 7.57 (t,  $J$  = 4.3 Hz, 1H), 7.21 (m, obscured by solvent), 6.97 (m, 3H), 6.82 (t,  $J$  = 6.7 Hz, 2H), 6.67 (m, 2H), 6.57 (d,  $J$  = 7.1 Hz, 1H), 6.28 (s, 1H), 5.26 (s, 1H), 4.15 (s, 1H), 4.02 (s, 1H), 3.84 (s, 1H), 3.72 (s, 1H), 3.67 (s, 1H), 3.60 (s, 1H), 3.45 (s, 1H), 2.84 (s, 3H), 2.08 (s, 3H). The NMR spectrum is shown in Figure S20.

$^{31}\text{P}\{^1\text{H}\}$  NMR ( $\text{C}_6\text{D}_6$ , 202 MHz, 25 °C):  $\delta$  30.47 (d, 22 Hz), 11.12 (d, 23 Hz). The NMR spectrum is shown in Figure S21.

$^{13}\text{C}\{^1\text{H}\}$  NMR ( $\text{C}_6\text{D}_6$ , 151 MHz, 25 °C):  $\delta$  142.93, 136.79, 136.48, 135.75, 134.12, 133.17, 131.67, 131.36, 131.09, 129.97, 126.63, 125.03, 77.14, 75.42, 74.35, 74.04, 73.79, 73.33, 72.04, 70.97, 67.84, 27.50, 25.83, 20.51. The NMR spectrum is shown in Figure S22.

Elemental Analysis:  $\text{C}_{42}\text{H}_{37}\text{BrFeNiP}_2$  % Calc'd(Found): C: 63.20(63.43); H: 4.67(4.97); N: <0.02(<0.02).

#### *Synthesis and Spectroscopic Data for (dppf)Ni<sup>II</sup>(2-methyl-4-nitrophenyl)(Br) (7)*

To a 100 mL Schlenk flask containing a stir bar in a glove box was added (dppf)Ni<sup>0</sup>(C<sub>2</sub>H<sub>4</sub>) (**18**) (200 mg, 0.312 mmol) and 2-bromo-5-nitrotoluene (67.4 mg, 0.312 mmol, 1 equiv.). The flask was sealed and brought out onto a Schlenk line. Approximately 10 mL of toluene was added to the flask via cannula transfer, and the mixture was stirred at room temperature for one hour. After one hour, the solvent was removed under vacuum, and the resulting orange residue was triturated with methanol (3 mL) and the solid was collected by filtration. The solid was then sonicated in 3 mL of diethyl ether for 10 minutes, then filtered. The resulting solid was recrystallized from THF layered with hexanes at -15 °C.

Yield: 44% (114.3 mg)

$^1\text{H}$  NMR ( $\text{C}_6\text{D}_6$ , 500 MHz, 25 °C):  $\delta$  8.52 (t, J = 8.1 Hz, 2H), 8.20 (t, J = 8.9 Hz, 2H), 8.12 (br s, 2H), 7.63 (m, 1H), 7.51 (m, 1H), 7.22 (m, J = 7.2 Hz, 6H), 7.00 (m, 2H), 6.93 (t, J = 7.0 Hz, 2H), 6.71 (m, 3H), 6.52 (t, J = 6.8 Hz, 2H), 5.11 (s, 1H), 4.11 (s, 1H), 4.05 (s, 1H), 3.83 (s, 1H), 3.63 (s, 1H), 3.58 (s, 1H), 3.55 (s, 1H), 3.38 (s, 1H), 2.78 (s, 3H). The NMR spectrum is shown in Figure S23.

$^{31}\text{P}\{^1\text{H}\}$  NMR ( $\text{C}_6\text{D}_6$ , 162 MHz, 25 °C):  $\delta$  31.66 (d, J = 24 Hz), 11.75 (d, J = 26 Hz) The NMR spectrum is shown in Figure S24.

$^{13}\text{C}\{^1\text{H}\}$  NMR ( $\text{C}_6\text{D}_6$ , 151 MHz, 25 °C):  $\delta$  145.82, 143.17, 136.32, 136.15, 136.09, 135.66, 135.59, 133.89, 133.57, 132.69, 131.85, 130.45, 130.34, 129.44, 127.05, 126.98, 121.96, 117.71, 76.84, 75.51, 74.48, 74.09, 73.49, 72.50, 71.29, 27.48. The NMR spectrum is shown in Figure S25.

Elemental Analysis:  $\text{C}_{41}\text{H}_{34}\text{BrFeNiNO}_2\text{P}_2$  % Calc'd(Found): C: 59.39(59.53); H: 4.13(4.65); N:1.69(1.42).

*Spectroscopic Data for (dppf)Ni<sup>II</sup>(2-methyl-4-trifluoromethylphenyl)(Br) (8)*

Yield: 60% (132.3 mg)

<sup>1</sup>H NMR (C<sub>6</sub>D<sub>6</sub>, 500 MHz, 25 °C): δ 8.57 (t, J = 7.3 Hz, 2H), 8.22 (t, J = 6.9 Hz, 2H), 7.69 (m, 1H), 7.21 (obscured by solvent), 7.04 (t, J = 7.0 Hz, 1H), 6.97 (m, 3H), 6.87 (d, J = 5.9 Hz, 1H), 6.81 (t, J = 5.9 Hz, 1H), 6.73 (m, 2H), 6.67 (m, 2H), 6.62 (s, 1H), 5.18 (s, 1H), 4.13 (s, 1H), 4.04 (s, 1H), 3.84 (s, 1H), 3.64 (s, 1H), 3.61 (s, 1H), 3.59 (s, 1H), 3.40 (s, 1H), 2.80 (s, 3H). The NMR spectrum is shown in Figure S26.

<sup>31</sup>P{<sup>1</sup>H} NMR (C<sub>6</sub>D<sub>6</sub>, 162 MHz, 25 °C): δ 31.72 (d, J = 29 Hz), 11.52 (d, J = 29 Hz). The NMR spectrum is shown in Figure S27.

<sup>13</sup>C{<sup>1</sup>H} NMR (C<sub>6</sub>D<sub>6</sub>, 151 MHz, 25 °C): δ 143.13, 136.52, 136.28, 136.21, 135.71, 135.64, 134.56, 134.44, 134.17, 134.05, 134.00, 133.82, 132.71, 132.65, 131.86, 131.72, 131.43, 130.34, 130.21, 129.08, 128.57, 128.50, 128.46, 128.35, 128.14, 127.98, 127.61, 127.07, 127.01, 124.67, 119.82, 110.41, 77.63, 77.07, 76.95, 76.21, 75.98, 75.51, 75.49, 74.51, 74.44, 74.17, 74.10, 73.96, 73.49, 73.46, 72.38, 72.36, 71.20. The NMR spectrum is shown in Figure S28.

<sup>19</sup>F{<sup>1</sup>H} NMR (C<sub>6</sub>D<sub>6</sub>, 470 MHz, 25 °C): δ -60.90 (s). The NMR spectrum is shown in Figure S29.  
Elemental Analysis: C<sub>24</sub>H<sub>34</sub>BrF<sub>3</sub>FeNiP<sub>2</sub> % Calc'd(Found): C: 59.20(59.86); H: 4.02(4.36); N: <0.02(<0.02).

*Spectroscopic Data for (dppf)Ni<sup>II</sup>(2-methyl-4-methoxyphenyl)(Br) (9)*

Yield: 67% (142.5 mg)

<sup>1</sup>H NMR (C<sub>6</sub>D<sub>6</sub>, 400 MHz, 25 °C): δ 8.66 (t, J = 8.4 Hz, 2H), 8.35 (br s, 2H), 8.28 (t, J = 8.8 Hz, 2H), 7.50j (dd, J = 4.1 Hz, J = 2.1 Hz, 1H), 7.36 (s, 1H), 7.21 (obscured by solvent), 7.00 (m, 4H), 6.83 (m, 3H), 6.73 (m, 3H), 6.48 (d, J = 6.4 Hz, 1H), 6.26 (s, 1H), 5.25 (s, 1H), 4.14 (s, 1H), 4.00 (s, 1H), 3.83 (s, 1H), 3.73 (s, 1H), 3.66 (s, 1H), 3.61 (s, 1H), 3.45 (s, 1H), 3.32 (s, 3H), 2.83 (s, 3H). The NMR spectrum is shown in Figure S30.

<sup>31</sup>P{<sup>1</sup>H} NMR (C<sub>6</sub>D<sub>6</sub>, 162 MHz, 25 °C): δ 31.72 (d, J = 21 Hz), 11.52 (d, J = 22 Hz). The NMR spectrum is shown in Figure S31.

<sup>13</sup>C{<sup>1</sup>H} NMR (C<sub>6</sub>D<sub>6</sub>, 151 MHz, 25 °C): δ 136.81, 136.46, 135.77, 133.93, 133.17, 131.68, 131.40, 126.78, 117.00, 115.98, 113.26, 112.09, 111.33, 110.69, 77.09, 74.41, 74.02, 73.63, 72.00, 70.98, 54.85, 27.55, 23.10, 16.79. The NMR spectrum is shown in Figure S32.

Elemental Analysis: C<sub>42</sub>H<sub>37</sub>BrFeNiOP<sub>2</sub> % Calc'd(Found): C: 61.96(62.24); H: 4.58(4.25); N: <0.02(<0.02).

*Spectroscopic Data for (dppf)Ni<sup>II</sup>(2-methyl-5-trifluoromethylphenyl)(Br) (10)*

Yield: 68% (150.0 mg)

<sup>1</sup>H NMR (C<sub>6</sub>D<sub>6</sub>, 400 MHz, 25 °C): δ 8.52 (t, J = 5.6 Hz, 2H), 8.27 (t, J = 8.6 Hz, 2H), 8.17 (t, J = 6.3 Hz, 2H), 8.07 (d, J = 4.7 Hz, 1H), 7.22 (m, 4H, obscured by solvent), 7.13 (m, 3H), 6.94 (m, 5H), 6.80 (m, 2H), 6.68 (t, J = 7.0 Hz, 2H), 6.30 (d, J = 7.9 Hz, 1H), 5.12 (s, 1H), 4.18 (s, 1H), 4.11 (s, 1H), 3.86 (s, 1H), 3.63 (s, 1H), 3.58 (s, 2H), 3.41 (s, 1H), 2.90 (s, 3H). The NMR spectrum is shown in Figure S33.

<sup>31</sup>P{<sup>1</sup>H} NMR (C<sub>6</sub>D<sub>6</sub>, 162 MHz, 25 °C): δ 32.07 (d, J = 29 Hz), 11.44 (J = 28 Hz). The NMR spectrum is shown in Figure S34.

<sup>13</sup>C{<sup>1</sup>H} NMR (C<sub>6</sub>D<sub>6</sub>, 151 MHz, 25 °C): δ 157.54, 157.28, 156.98, 156.73, 146.96, 136.27, 136.19, 135.65, 135.58, 135.34, 134.96, 134.46, 134.19, 133.90, 133.66, 133.02, 132.13, 131.64, 131.33, 130.33, 130.17, 129.12, 128.56, 128.49, 128.41, 128.35, 127.19, 127.12, 125.79, 125.58, 125.13, 119.49, 77.54, 77.25, 76.77, 76.65, 76.30, 76.07, 75.36, 74.38, 74.31, 74.05, 73.31, 72.55, 71.35, 27.83. The NMR spectrum is shown in Figure S35.

<sup>19</sup>F{<sup>1</sup>H} NMR (C<sub>6</sub>D<sub>6</sub>, 470 MHz, 25 °C): δ -61.36 (s). The NMR spectrum is shown in Figure S36.  
Elemental Analysis: C<sub>42</sub>H<sub>34</sub>BrF<sub>3</sub>FeNiP<sub>2</sub> % Calc'd(Found): C: 59.20(59.71); H: 4.02(4.56); N: <0.02(<0.02).

*Spectroscopic Data for (dppf)Ni<sup>II</sup>(2,6-xylyl)(Br) (11)*

Yield: 54% (111.2 mg)

Due to fluxional processes, the <sup>1</sup>H NMR spectrum was obtained at low temperature.

<sup>1</sup>H NMR (*d*<sub>8</sub>-toluene, 500 MHz, -50 °C): δ 9.47 (br s, 1H), 8.85 (t, J = 6.6 Hz, 3H), 7.24 (m, 4H), 7.10 (obscured by solvent), 6.88-6.78 (m, 6H), 6.64 (t, J = 7.1 Hz, 2H), 6.51 (br s, 1H), 6.29-6.22 (m, 2H), 5.67 (s, 1H), 4.22 (s, 1H), 3.80 (s, 1H), 3.77 (s, 1H), 3.61 (s, 1H), 3.53 (s, 1H), 3.44 (s, 1H), 3.39 (s, 1H), 3.30 (s, 3H), 3.18 (s, 3H). The NMR spectrum is shown in Figure S37.

<sup>31</sup>P{<sup>1</sup>H} NMR (C<sub>6</sub>D<sub>6</sub>, 162 MHz, 25 °C): δ 32.87 (d, J = 19 Hz); 10.94 (d, J = 19 Hz). The NMR spectrum is shown in Figure S38.



$^{13}\text{C}\{^1\text{H}\}$  NMR ( $\text{C}_6\text{D}_6$ , 126 MHz, 25 °C):  $\delta$  140.52, 135.79, 134.80, 130.09, 127.32, 126.29, 123.46, 78.92, 77.10, 75.44, 75.16, 73.27, 71.97, 27.52. The NMR spectrum is shown in Figure S39.

Elemental Analysis:  $\text{C}_{42}\text{H}_{37}\text{BrFeNiP}_2$  % Calc'd(Found): C: 63.20(62.73); H: 4.67(5.06); N: <0.02(<0.02).

*Spectroscopic Data for (dppf)Ni<sup>II</sup>(2-trifluoromethyl-6-methylphenyl)(Br) (12)*

Yield: 72% (159.1 mg)

Due to fluxional processes, the  $^1\text{H}$ ,  $^{31}\text{P}$ , and  $^{19}\text{F}$  NMR spectra were obtained at low temperature. At low temperature, the species appears as two rotamers, in an approximately a 2:1 ratio. NMR data for both rotamers are reported.

$^1\text{H}$  NMR ( $d_8$ -toluene, 500 MHz, -50 °C):  $\delta$  9.40 (t, J = 10.7 Hz, 2H), 9.32 (t, J = 10.0 Hz, 0.7H), 9.13 (t, J = 9.0 Hz, 0.5H), 8.86 (t, J = 6.7 Hz, 2H), 8.81 (t, J = 8.3 Hz, 1H), 7.52 (br s, 1.5H), 7.35 (t, J = 8.4 Hz, 2H), 7.23 (m, 5H), 7.03 (obscured by solvent), 6.85 (m, 8H), 6.70 (m, 5H), 6.50 (m, 3H), 6.35 (t, J = 6.6 Hz, 1H), 6.28 (d, J = 6.6 Hz, 0.6H), 6.10 (t, J = 7.9 Hz, 1H), 5.84 (s, 1H), 5.68 (s, 0.5H), 4.21 (s, 0.5H), 4.18 (s, 1H), 3.74 (s, 2H), 3.67 (s, 1H), 3.65 (s, 0.7H), 3.58 (s, 3H), 3.57 (s, 2H), 3.53 (s, 1H), 3.44 (s, 3H), 3.41 (s, 2H), 3.37 (s, 2H), 3.34 (s, 0.7H). The NMR spectrum is shown in Figure S40.

$^{31}\text{P}\{^1\text{H}\}$  NMR ( $d_8$ -toluene, 202 MHz, -50 °C):  $\delta$  major isomer: 31.37 (dq, J = 37 Hz, 10 Hz), 12.66 (d, J = 38 Hz); minor isomer: 32.15 (d, J = 36 Hz), 13.43 (d, J = 36 Hz). The NMR spectrum is shown in Figure S41.

$^{13}\text{C}\{^1\text{H}\}$  NMR ( $\text{C}_6\text{D}_6$ , 151 MHz, 25 °C):  $\delta$  136.77, 135.11, 134.36, 133.73, 131.69, 131.42, 130.17, 124.52, 123.73, 122.91, 78.21, 77.94, 76.76, 76.54, 75.35, 74.82, 73.86, 73.36, 30.25. The NMR spectrum is shown in Figure S42.

$^{19}\text{F}\{^1\text{H}\}$  NMR ( $d_8$ -toluene, 376 MHz, -50 °C):  $\delta$  major isomer: -50.2 (d, J = 10 Hz); minor isomer: -47.67 (s). The NMR spectrum is shown in Figure S43.

Elemental Analysis:  $\text{C}_{42}\text{H}_{34}\text{BrF}_3\text{FeNiP}_2$  % Calc'd(Found): C: 59.20(58.89); H: 4.02(4.12); N: <0.02(<0.02).

*Spectroscopic Data for (dppf)Ni<sup>II</sup>(2,6-dimethyl-4-fluorophenyl)(Br) (13)*

Yield: 89% (199.8 mg)

Due to fluxional processes, the  $^1\text{H}$  NMR spectrum was obtained at low temperature.

$^1\text{H}$  NMR ( $d_8$ -toluene, 400 MHz,  $-50\text{ }^\circ\text{C}$ ):  $\delta$  9.42 (br s, 2H), 8.80 (t,  $J = 7.2$  Hz, 2H), 7.64 (dd,  $J = 4.5$  Hz,  $J = 7.2$  Hz, 1H), 7.22 (m, obscured by solvent), 7.11 (obscured by solvent), 6.87 (m, 4H), 6.80 (m, 3H), 6.72 (m, 2H), 6.57 (t,  $J = 10.6$  Hz, 2H), 6.10 (m, 2H), 5.58 (s, 1H), 4.19 (s, 1H), 3.77 (s, 1H), 3.72 (s, 1H), 3.49 (s, 1H), 3.41 (s, 1H), 3.37 (s, 1H), 3.15 (s, 3H), 3.04 (s, 3H). The NMR spectrum is shown in Figure S44.

$^{31}\text{P}\{^1\text{H}\}$  NMR ( $\text{C}_6\text{D}_6$ , 162 MHz,  $25\text{ }^\circ\text{C}$ ):  $\delta$  32.64 (dd,  $J = 27$  Hz, 2 Hz), 11.36 (dd,  $J = 27$  Hz, 2 Hz). The NMR spectrum is shown in Figure S45.

$^{13}\text{C}\{^1\text{H}\}$  NMR ( $\text{C}_6\text{D}_6$ , 151 MHz,  $25\text{ }^\circ\text{C}$ ):  $\delta$  163.77, 162.21, 146.41, 146.17, 145.85, 145.61, 144.02, 141.02, 137.58, 135.67, 134.43, 134.17, 131.67, 130.18, 113.05, 112.95, 78.48, 78.21, 77.03, 76.80, 75.18, 73.38, 72.09, 65.94, 27.30, 15.62. The NMR spectrum is shown in Figure S46.

$^{19}\text{F}\{^1\text{H}\}$  NMR ( $\text{C}_6\text{D}_6$ , 470 MHz,  $25\text{ }^\circ\text{C}$ ):  $\delta$  -127.62 (t,  $J = 10.33$  Hz). The NMR spectrum is shown in Figure S47.

Elemental Analysis:  $\text{C}_{42}\text{H}_{36}\text{BrFFeNiP}_2$  % Calc'd(Found): C: 61.81(62.06); H: 4.45(4.67); N: <0.02(<0.02).

#### *Spectroscopic Data for (dppf)Ni<sup>II</sup>(mesityl)(Br) (14)*

Yield: 75% (158.6 mg)

Due to fluxional processes, the  $^1\text{H}$  NMR spectrum was obtained at low temperature.

$^1\text{H}$  NMR ( $d_8$ -toluene, 500 MHz,  $-50\text{ }^\circ\text{C}$ ):  $\delta$  9.49 (br s, 1H), 8.85 (t,  $J = 7.0$  Hz, 2H), 8.06 (br s, 2H), 7.24 (m, 4H), 7.10 (obscured by solvent), 6.88-6.79 (m, 6H), 6.55 (br s, 1H), 6.43 (br s, 1H), 6.17 (s, 1H), 6.02 (s, 1H), 5.66 (s, 1H), 4.21 (s, 1H), 3.79 (s, 1H), 3.76 (s, 1H), 3.60 (s, 1H), 3.55 (s, 1H), 3.44 (s, 1H), 3.39 (s, 1H), 3.25 (s, 3H), 3.13 (s, 3H), 2.16 (s, 3H). The NMR spectrum is shown in Figure S48.

$^{31}\text{P}\{^1\text{H}\}$  NMR ( $\text{C}_6\text{D}_6$ , 162 MHz,  $25\text{ }^\circ\text{C}$ ):  $\delta$  32.53 (d,  $J = 19$  Hz); 10.87 (d,  $J = 19$  Hz). The NMR spectrum is shown in Figure S49.

$^{13}\text{C}\{^1\text{H}\}$  NMR ( $\text{C}_6\text{D}_6$ , 126 MHz,  $25\text{ }^\circ\text{C}$ ):  $\delta$  140.10, 135.79, 135.28, 134.97, 134.49, 131.94, 130.07, 130.07, 129.75, 127.21, 127.18, 75.43, 75.35, 75.14, 73.27, 73.21, 72.01, 71.91, 27.32, 20.35. The NMR spectrum is shown in Figure S50.

Elemental Analysis:  $\text{C}_{43}\text{H}_{39}\text{BrFeNiP}_2$  % Calc'd(Found): C: 63.59(63.79); H: 4.84(4.66); N: <0.02(<0.02).

*Spectroscopic Data for (dppf)Ni<sup>II</sup>(2,6-dimethyl-4-methoxyphenyl)(Br) (15)*

Yield: 76% (162.6 mg)

Due to fluxional processes, the <sup>1</sup>H NMR spectrum was obtained at low temperature.

<sup>1</sup>H NMR (*d*<sub>8</sub>-toluene, 500 MHz, -50 °C): δ 9.50 (br s, 1H), 8.85 (t, J = 6.9 Hz, 3H), 7.65 (dd, J = 2.9 Hz, J = 7.8 Hz, 1H), 7.23 (m, 5H), 7.10 (obscured by solvent), 6.87 (m, 4H), 6.78 (m, 4H), 6.52 (m, 3H), 6.21 (t, J = 10.3 Hz, 1H), 5.99 (s, 1H), 5.64 (s, 1H), 4.20 (s, 1H), 3.77 (s, 1H), 3.75 (s, 1H), 3.59 (s, 1H), 3.55 (s, 1H), 3.42 (s, 1H), 3.38 (s, 1H), 3.34 (s, 3H), 3.24 (s, 3H), 3.23 (s, 1H), 3.12 (s, 3H). The NMR spectrum is shown in Figure S51.

<sup>31</sup>P{<sup>1</sup>H} NMR (C<sub>6</sub>D<sub>6</sub>, 202 MHz, 25 °C): δ 32.52 (d, J = 25 Hz), 11.05 (J = 25 Hz). The NMR spectrum is shown in Figure S52.

<sup>13</sup>C{<sup>1</sup>H} NMR (C<sub>6</sub>D<sub>6</sub>, 151 MHz, 25 °C): δ 158.81, 140.45, 140.05, 139.74, 139.50, 135.77, 134.75, 130.09, 128.48, 128.38, 128.35, 128.14, 127.98, 127.61, 127.27, 113.47, 113.44, 113.42, 113.40, 78.97, 78.94, 78.70, 77.42, 77.20, 75.14, 73.24, 71.95, 54.84, 27.52. The NMR spectrum is shown in Figure S53.

Despite repeated attempts this species did not pass elemental analysis.

### **SIII. Analysis of Catalyst Speciation in Situ via EPR Spectroscopy**

#### *General Procedure for EPR Spectroscopy*

A stock solution containing naphthalen-1-yl sulfamate (0.266 mmol), naphthalene (0.133 mmol) and precatalyst (2.5 mol%, 0.00665 mmol) in 2 mL of toluene was prepared. 4-methoxyphenylboronic acid (50.0 mg, 0.333 mmol) and  $K_3PO_4$  (127.2 mg, 0.599 mmol) were weighed into a 1-dram vial containing a stir bar. 1 mL of the stock solution was added via micropipette to the vial. The vial was tightly capped and removed from the glovebox. The vial was then placed in an aluminum heating block with a thermocouple at room temperature and stirred for 4 hours. In order to record an EPR spectrum, 61  $\mu$ L of reaction mixture was removed from the catalytic reaction in a glovebox and added to an EPR tube along with 139  $\mu$ L of toluene. The tube was sealed and removed from the glovebox and immediately frozen in liquid nitrogen. The EPR spectrum was then recorded.

X-Band EPR spectra were recorded at cryogenic temperatures (<15 K) on a Bruker ELEXSYS E500 EPR spectrometer equipped with a SHQ resonator and an Oxford ESR-900 helium-flow cryostat with the following settings: microwave frequency, 9.4 GHz; modulation frequency, 100 kHz; modulation amplitude, 10 G; sweep time, 84 s; conversion time, 41 ms; time constant 20 ms, power, 0.1-10 mW. The presence or absence of bromide-ligated nickel(I) species was verified by the septet hyperfine splitting pattern in  $g_{\perp}$  from coupling to Br nuclei. Definitive identification was conducted by comparison of experimental spectra to the known spectra of (dppf)Ni<sup>I</sup>Br and (dppf)Ni<sup>I</sup>(sulfamate).<sup>6</sup> Representative comparisons are given in Figures S1A and S1B.

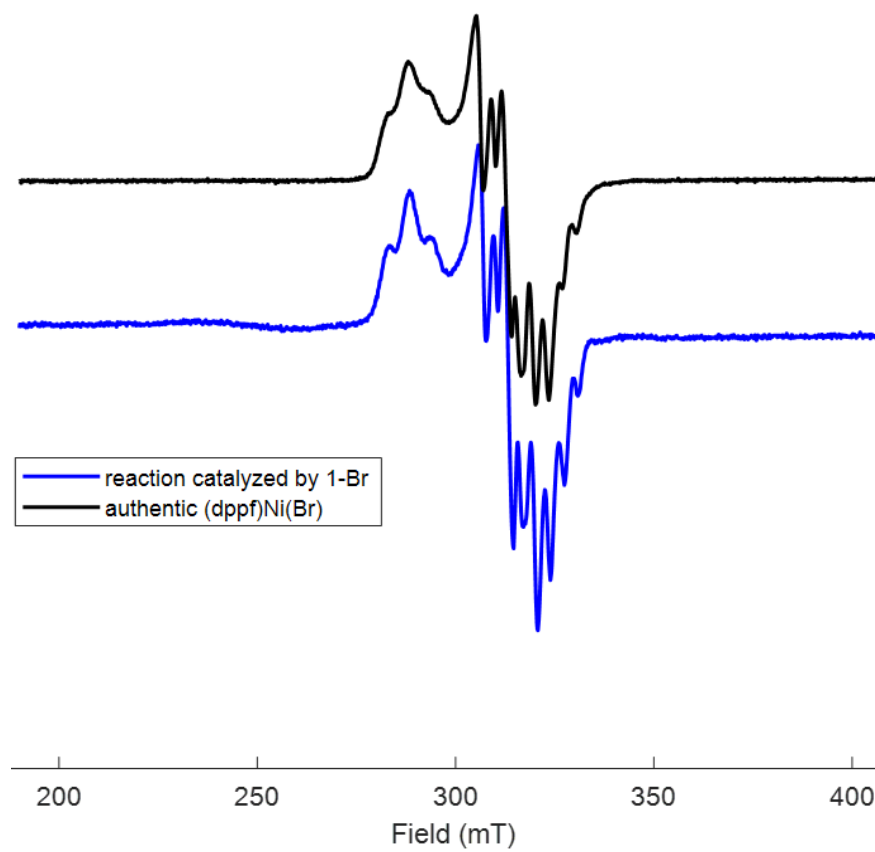

**Figure S1A.** Representative comparison of Ni(I) material identified by EPR spectroscopy in a reaction catalyzed by **1-Br** (blue trace) versus authentic (dppf)Ni<sup>I</sup>(Br)<sup>6</sup> (black trace).

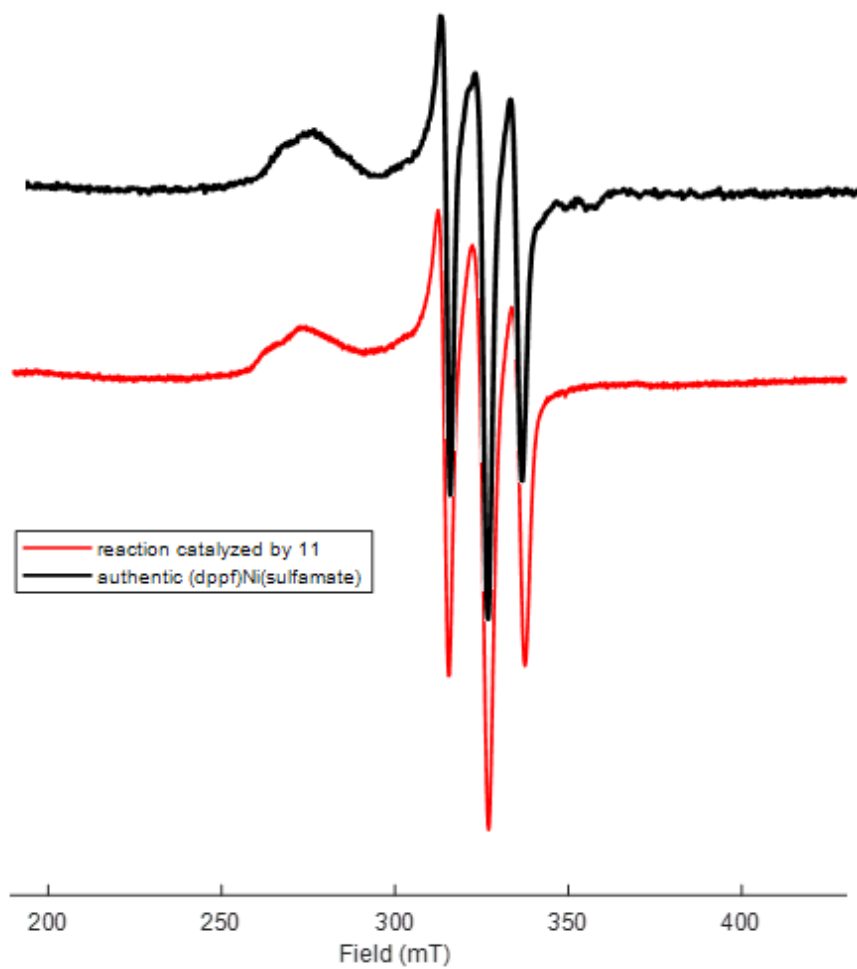

**Figure S1B.** Representative comparison of Ni(I) material identified by EPR spectroscopy in a reaction catalyzed by **11** (red trace) versus authentic (dppf)Ni<sup>I</sup>(sulfamate)<sup>6</sup> (black trace).

#### **SIV. Catalytic Performance of Precatalysts**

##### *General Procedure for Catalysis for Reactions A, A', A'', B, and D*

A stock solution containing aryl sulfamate (0.266 mmol), naphthalene (0.133 mmol) and precatalyst (2.5 mol%, 0.00665 mmol) in 2 mL of toluene was prepared. Boronic acid and  $K_3PO_4$  were weighed into a 1-dram vial containing a stir bar. 1 mL of the stock solution was added via micropipette to the vial. The vial was tightly capped and removed from the glovebox. The vial was then placed in an aluminum heating block with a thermocouple at room temperature and stirred for 4 hours. In order to prepare a GC sample, the reactions were quenched by exposure to air, after which 100-200  $\mu$ L of the reaction mixture was added to a ~5 cm plug of silica and eluted with ethyl acetate. The yield of cross-coupled product was determined by gas chromatography, referenced to the naphthalene internal standard. All reactions were performed in duplicate and the reported yields are the average of two runs.

##### *General Procedure for Catalysis for Reactions C and E*

A stock solution containing aryl chloride (0.4 mmol), naphthalene (0.2 mmol) and precatalyst (2.5 mol%, 0.01 mmol) in 680  $\mu$ L of 1,4-dioxane and 320  $\mu$ L of benzene was prepared. Boronic acid (0.4 mmol, 2 equiv.) and  $K_3PO_4$  (0.8 mmol, 4 equiv.) were weighed into a 1-dram vial containing a stir bar. 500  $\mu$ L of the stock solution was added via micropipette to the vial. The vial was tightly capped and removed from the glovebox. The vial was then placed in an aluminum heating block with a thermocouple at room temperature and stirred for 4 hours. In order to prepare a GC sample, the reactions were quenched by exposure to air, after which 50-100  $\mu$ L of the reaction mixture was added to a ~5 cm plug of silica and eluted with ethyl acetate. The yield of cross-coupled product was determined by gas chromatography, referenced to the naphthalene internal standard. All reactions were performed in duplicate and the reported yields are the average of two runs.

##### *General Procedure for Spiking Experiments*

A stock solution containing 1-naphthyl sulfamate (66.6 mg, 0.266 mmol), naphthalene (16.8 mg, 0.133 mmol, 0.5 equiv.) and precatalyst (2.5 mol%, 0.00665 mmol) in 2 mL of toluene was prepared. 4-methoxyphenylboronic acid (49.9 mg, 0.333 mmol, 2.5 equiv.) and  $K_3PO_4$  (127.2 mg, 0.599 mmol, 4.5 equiv.) were weighed into a 1-dram vial containing a stir bar. 1 mL of the stock solution was added via micropipette to the vial. The vial was tightly capped and removed from the glovebox. The vial was then placed in an aluminum heating block with a thermocouple at room

temperature and stirred for 4 hours. Another stock solution was prepared, containing 1-naphthyl sulfamate (66.6 mg, 0.266 mmol) in 1 mL of toluene. After 4 hours, the vial was brought back into the glove box, after which 500  $\mu$ L of the stock solution containing only 1-naphthyl sulfamate was added. The vial was capped tightly, removed from the glove box, and stirred in the aluminum heating block at room temperature for another 4 hours. In order to prepare a GC sample, the reactions were quenched by exposure to air, after which 50-100  $\mu$ L of the reaction mixture was added to a ~5 cm plug of silica and eluted with ethyl acetate. The yield of cross-coupled product was determined by gas chromatography, referenced to the naphthalene internal standard. All reactions were performed in duplicate and the reported yields are the average of two runs.

*Procedure for Catalysis in the Presence of 3-Nitrotoluene*

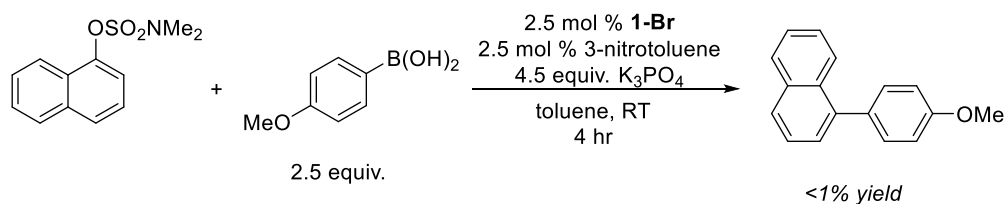

A stock solution containing 1-naphthyl sulfamate (66.6 mg, 0.266 mmol), naphthalene (16.8 mg, 0.133 mmol, 0.5 equiv.) and **1-Br** (5.2 mg, 2.5 mol%, 0.00665 mmol) in 2 mL of toluene was prepared. 4-methoxyphenylboronic acid (49.9 mg, 0.333 mmol, 2.5 equiv.) and  $K_3PO_4$  (127.2 mg, 0.599 mmol, 4.5 equiv.) were weighed into a 1-dram vial containing a stir bar. 1 mL of the stock solution was added via micropipette to the vial. 3-nitrotoluene (0.4  $\mu$ L, 0.003325 mmol, 1 equiv. relative to precatalyst) was added to each vial via micropipette. The vial was tightly capped and removed from the glovebox. The vial was then placed in an aluminum heating block with a thermocouple at room temperature and stirred for 4 hours. In order to prepare a GC sample, the reactions were quenched by exposure to air, after which 50-100  $\mu$ L of the reaction mixture was added to a ~5 cm plug of silica and eluted with ethyl acetate. The yield of cross-coupled product was determined by gas chromatography, referenced to the naphthalene internal standard. All reactions were performed in duplicate and the reported yields are the average of two runs.



## SV. Correlation of Catalytic Results to % Buried Volume and Hammett Parameters

In order to determine any correlation between catalytic results and the steric/electronic effects on the precatalysts, the yields of the cross-coupled products were plotted against quantifiable metrics for either sterics or electronics. % Buried Volume was used to quantify sterics, while Hammett parameters were assigned to precatalysts substituted with moieties other than hydrogens in the para-position of the aryl group. Details regarding analyses as well as discussion of the resulting correlations are given below.

### *Correlation of Catalytic Results to % Buried Volume*

% Buried Volume was determined using the SambVca 2.0 server<sup>7</sup> for all precatalysts characterized by X-ray crystallography. The coordinates for the molecules were generated from the .cif files obtained from crystallographic characterization.<sup>4,8</sup> The Ni atom was defined as the center of the sphere. The z-axis was defined as coincident with the Ni-Br bond, while the xz-plane was defined

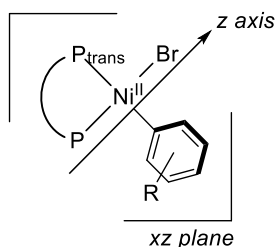

**Figure S2.** Definition of axes for %  $V_{\text{bur}}$  calculations.

**Table S1.** Tabulated %  $V_{\text{Bur}}$  for each precatalyst.

| Species | % Vbur |
|---------|--------|
| 1-Cl    | 92.6   |
| 2       | 92.7   |
| 3       | 93.3   |
| 4       | 95.1   |
| 5       | 92.3   |
| 6       | 92.7   |
| 7       | 92.4   |
| 8       | 92.5   |
| 10      | 93.4   |
| 12      | 96.4   |
| 13      | 95.6   |
| 14      | 96.6   |
| 16      | 97.8   |

as containing C<sub>aryl</sub>, Ni, and Br (Figure S2). The bond radii were scaled by 1.17, and the radius of the sphere was set to 3.5 Å. Hydrogens were included in the model. The resulting % Buried Volume (% V<sub>Bur</sub>) values are shown in Table S1.

Plotting yield of cross-coupled product as a function of % V<sub>Bur</sub> for each reaction indicates no strong correlation between steric bulk on the precatalyst and catalytic efficiency, as indicated by regression analysis (Figure S3). For individual reactions, there is a weak correlation between sterics and catalytic efficiency. For example, the strongest correlation ( $R^2 = 0.2084$ ) occurs in Reaction **B**, indicating a slight decrease in yield corresponding to an increase in steric bulk. However, this correlation is poor, and the overall conclusion from these correlations is that % V<sub>Bur</sub> is a poor metric in determining reaction yields for the reactions surveyed in this study.

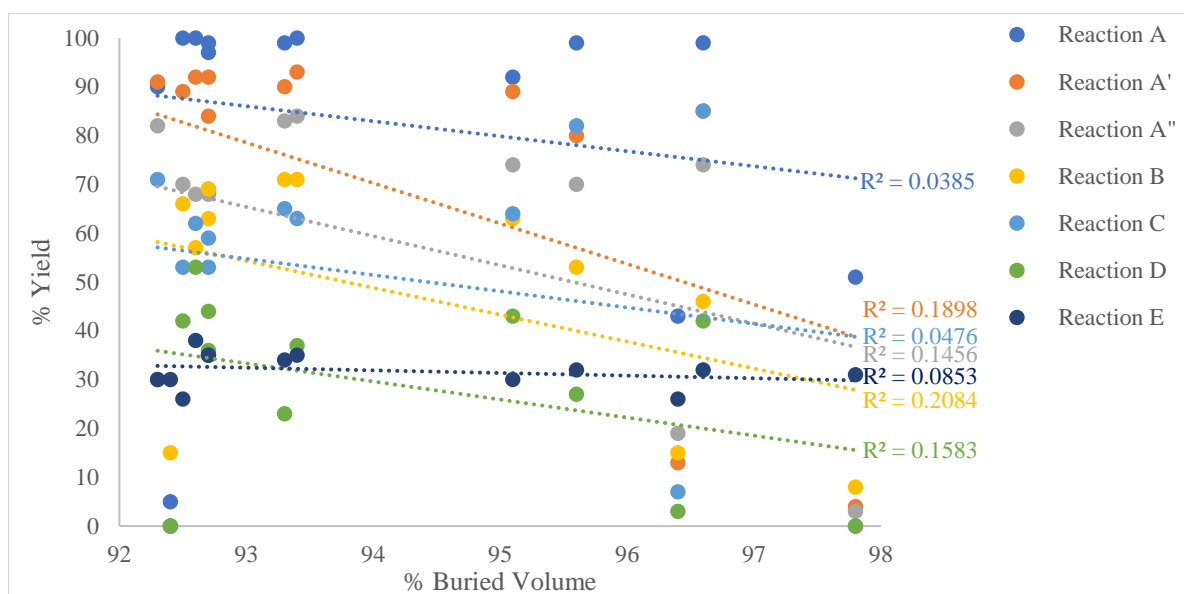

**Figure S3.** Regression analysis for the correlation of yield of cross-coupled product with % V<sub>Bur</sub>.

Further interpretation can be conducted if precatalyst **7**, containing a nitro moiety in the 4-position, is excluded. Control experiments (*see SIV. Catalytic Performance of Precatalysts*) indicate that the nitroarene contributes to detrimental chemistry that renders **7** an inefficient precatalyst. Exclusion of the yields of **7** as an outlier in the analysis significantly improves the correlations, as determined by regression analysis (Figure S4). The slight trend now observed is that more steric bulk correlates with a lower yield of cross-coupled product for all reactions except reaction **E**. However, the correlations are still weak at best; as such, the conclusions remain the same- % V<sub>Bur</sub> does not effectively track with reaction yield.

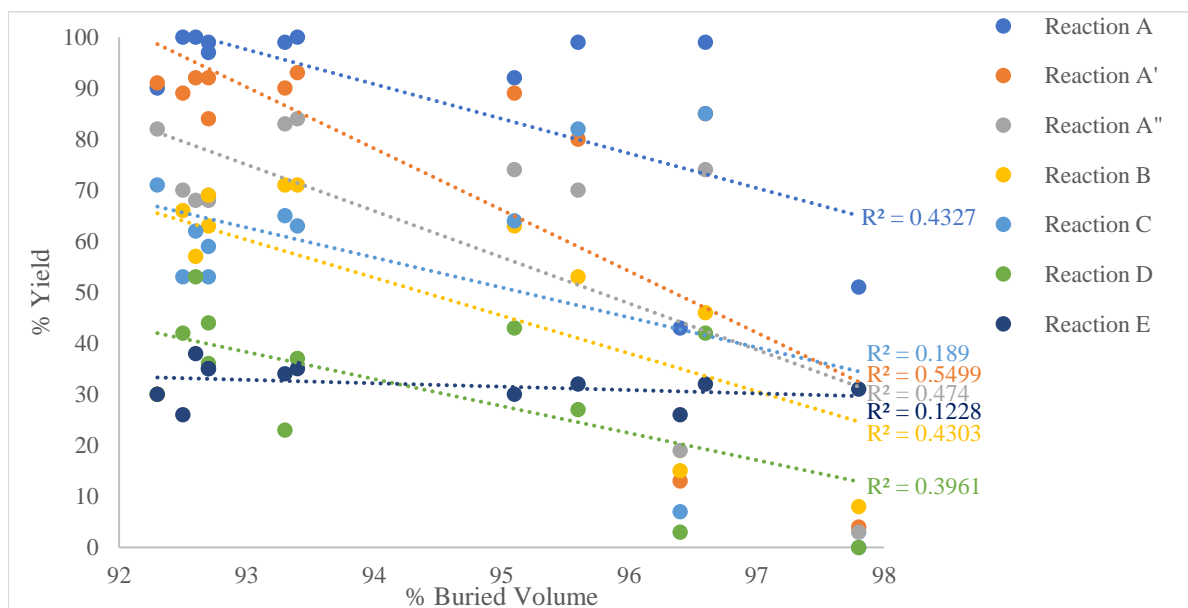

**Figure S4.** Regression analysis for the correlation of yield of cross-coupled product with %  $V_{\text{Bur}}$ , excluding data from 7.

The effect of %  $V_{\text{Bur}}$  on yield can be re-evaluated by including only the nickel center and aryl unit in the calculated volume, in order to identify any possible correlation that is specifically due to the aryl group on the molecule. As such, the %  $V_{\text{Bur}}$  was recalculated, excluding every atom except the nickel center and the atoms pertaining to the appended aryl group. The defined axes in this regime are given in Figure S3, and the resulting %  $V_{\text{Bur}}$  values are given in Table S2.

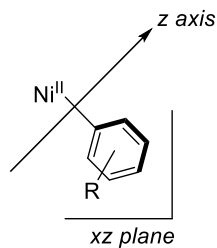

**Figure S5.** Definition of axes for %  $V_{\text{bur}}$  calculations, excluding all but the nickel center and aryl group.

**Table S2.** Tabulated %  $V_{\text{Bur}}$  for each precatalyst.

| Species     | % Vbur |
|-------------|--------|
| <b>1-Cl</b> | 37.1   |
| <b>2</b>    | 37.0   |
| <b>3</b>    | 37.7   |
| <b>4</b>    | 39.7   |
| <b>5</b>    | 36.7   |
| <b>6</b>    | 37.6   |
| <b>7</b>    | 37.1   |
| <b>8</b>    | 37.5   |
| <b>10</b>   | 37.5   |
| <b>12</b>   | 43.2   |
| <b>13</b>   | 41.0   |
| <b>14</b>   | 40.9   |
| <b>16</b>   | 42.6   |

Once again, there are no strong correlations between %  $V_{\text{bur}}$  and reaction yield (Figure S6). Weak negative correlations exist universally across all reactions, with the strongest correlation having an  $R^2$  of only 0.26. The trend associated with the correlations is that an increase in steric bulk correlates with decreased reaction yields. Further, exclusion of the data of 7 also results in improved, but still weak negative correlations (Figure S7). However, the overall conclusion is that %  $V_{\text{bur}}$  is a poor predictor of reaction yield.

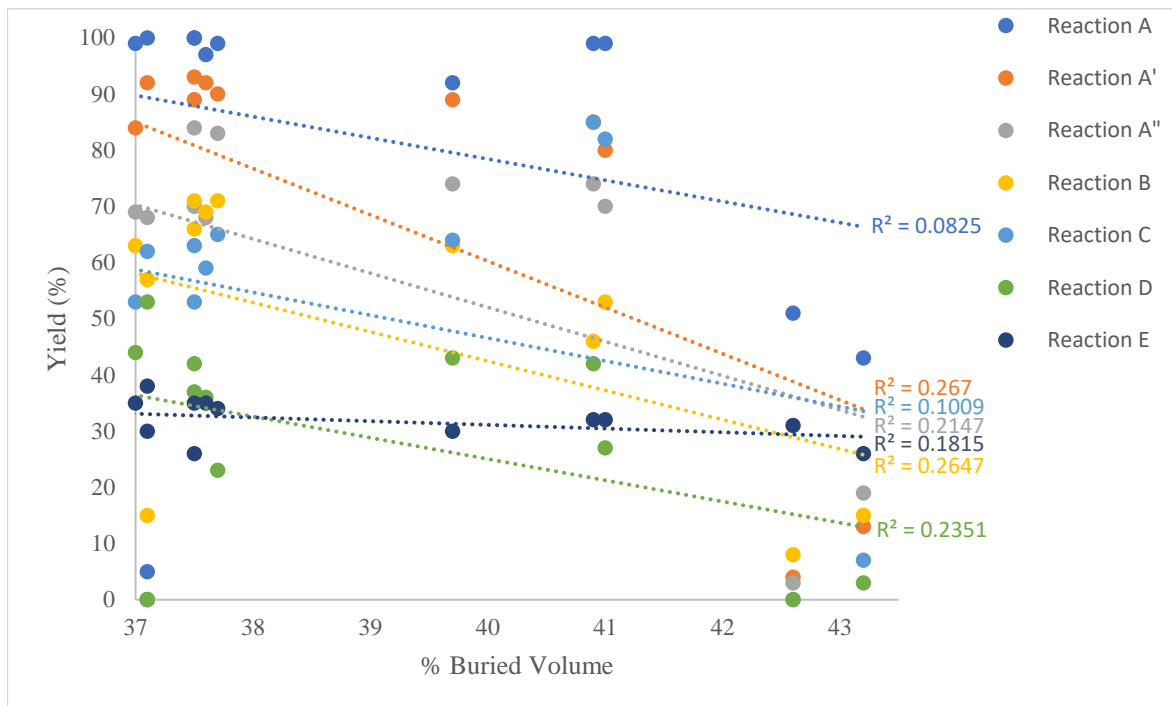

**Figure S6.** Regression analysis for the correlation of yield of cross-coupled product with %  $V_{\text{Bur}}$  for only the nickel and aryl atoms.

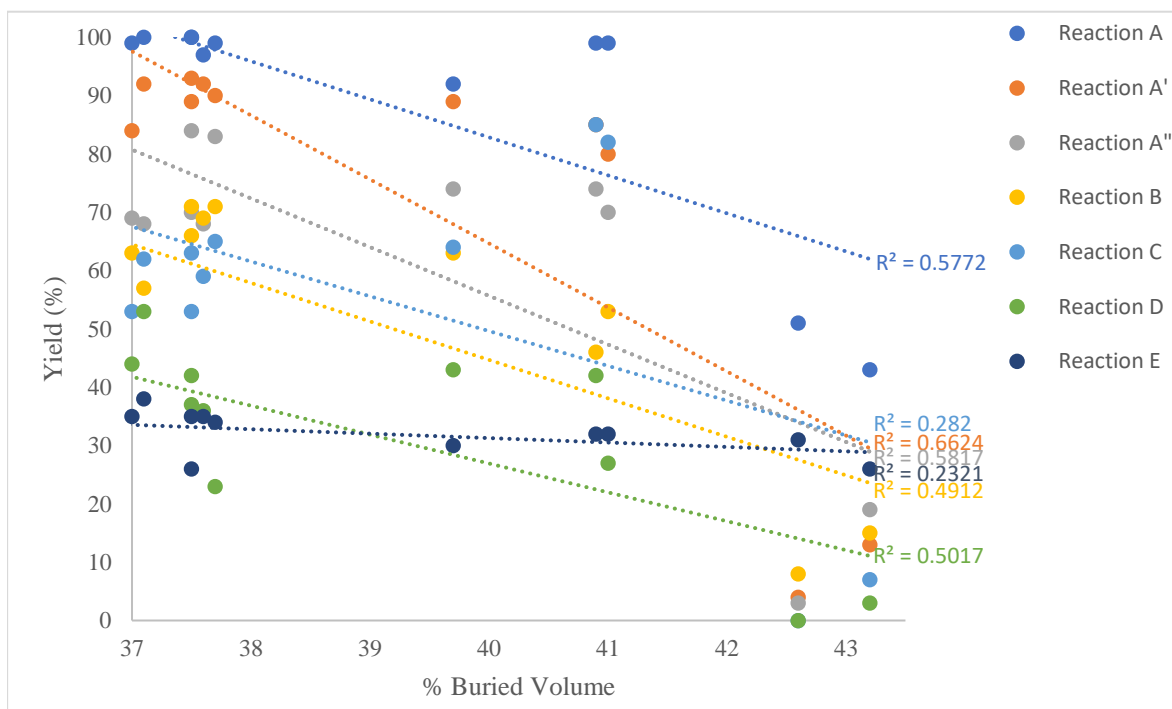

**Figure S7.** Regression analysis for the correlation of yield of cross-coupled product with %  $V_{\text{Bur}}$  for only the nickel and aryl atoms, excluding data from **7**.

### *Correlation of Catalytic Results to Hammett Parameters*

In order to determine any correlations coming from Hammett parameters, a subset of the precatalyst suite was chosen. The subset contains precatalysts that are explicitly substituted in the para-position of the aryl ring- that is, the 2-, 2,5- and 2,6-substituted species were excluded from this analysis. Values for  $\sigma_p$  were taken from the literature.<sup>9</sup> The precatalysts chosen and corresponding Hammett parameters are given in Table S3.

**Table S3.** Tabulated Hammett parameters for 4-substituted precatalysts.

| <b>Species</b> | <b><math>\sigma_p</math></b> |
|----------------|------------------------------|
| <b>6</b>       | -0.17                        |
| <b>7</b>       | 0.78                         |
| <b>8</b>       | 0.54                         |
| <b>9</b>       | -0.27                        |
| <b>13</b>      | 0.06                         |
| <b>14</b>      | -0.17                        |
| <b>15</b>      | -0.27                        |

In agreement with the lack of correlations seen in the analysis of yield based on %  $V_{\text{Bur}}$ , there are no strong associations between Hammett parameters and yield of cross-coupled product for the reactions analyzed (Figure S8). Relatively weak correlations exist for reactions **A**, **A'**, **A''**, **C**, and **D**. The observed trend is a decrease in yield when more electron-withdrawing moieties are appended on the precatalyst. However, excluding the data originating from the performance of precatalyst **7** results in deterioration of all previous weak correlations seen in Figure S8 (Figure S9). In this regime, there are universally no correlations between electronics and reaction yield in all cases except reaction **B**. In reaction **B**, there appears to be a very weak positive correlation between electronics and reaction yield, indicating that more electron-withdrawing moieties on the precatalyst correlate with a higher reaction yield. This is more consistent with the global data from the heat map in Figure 5b, in which none of the methoxy-substituted (negative Hammett parameters) precatalysts were able to effectively catalyze reaction **B**. Overall, our results indicate that there is minimal to no association between Hammett parameters and reaction yield.

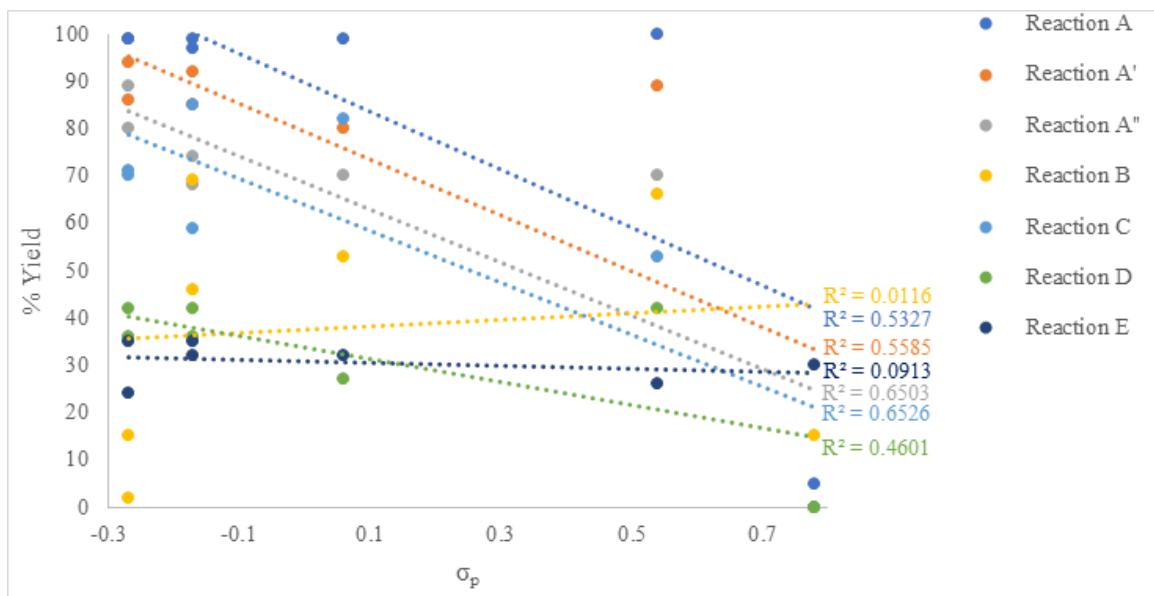

**Figure S8.** Regression analysis for the correlation of yield of cross-coupled product with  $\sigma_p$ .

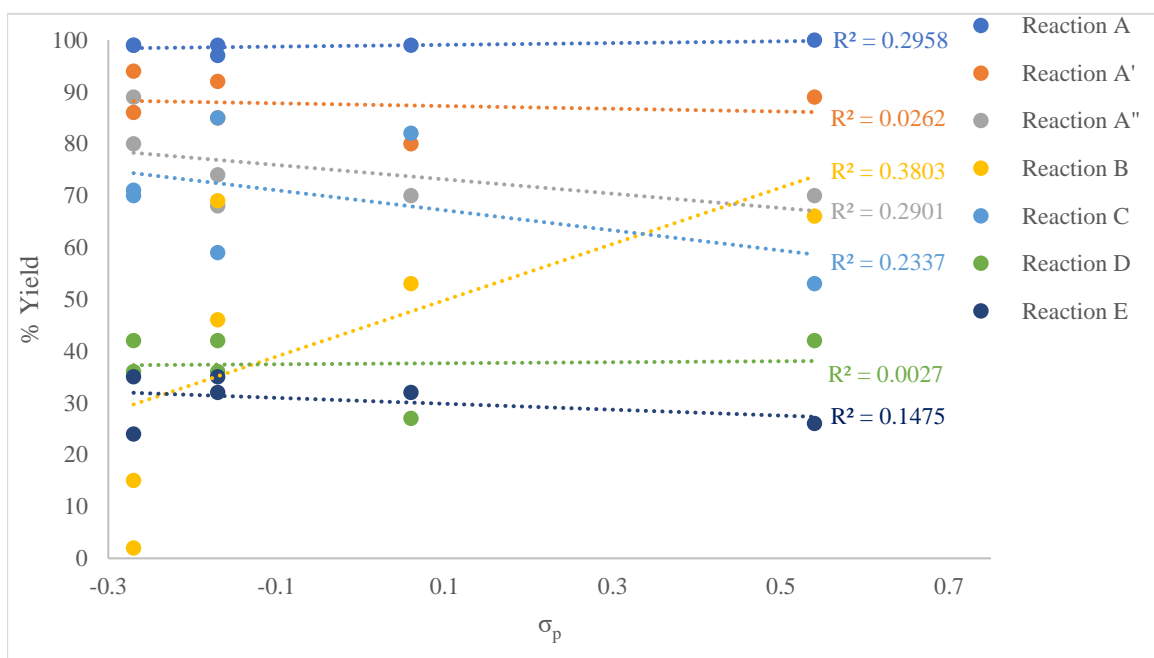

**Figure S9.** Regression analysis for the correlation of yield of cross-coupled product with  $\sigma_p$ , excluding data from 7.

## SVI. NMR Spectra

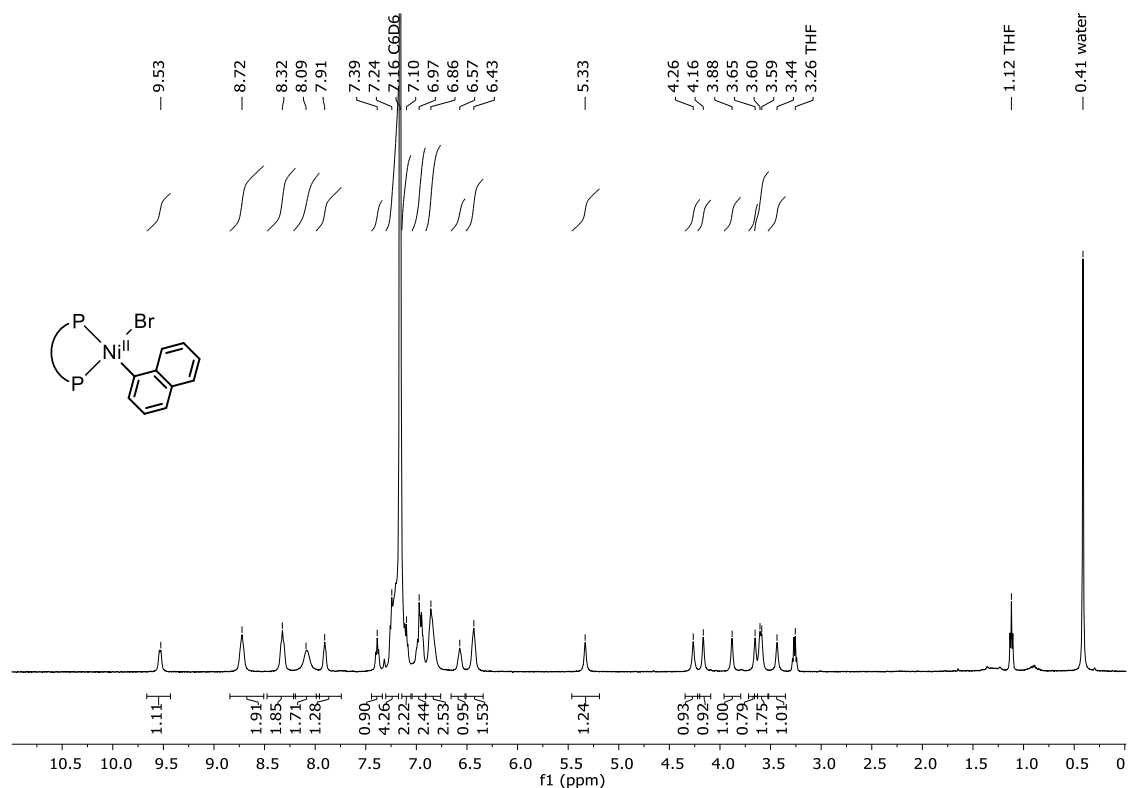

Figure S10.  $^1\text{H}$  NMR spectrum ( $\text{C}_6\text{D}_6$ , 500 MHz, 25 °C) of  $(\text{dppf})\text{Ni}^{\text{II}}(1\text{-naphthyl})(\text{Br})$ , **2**.

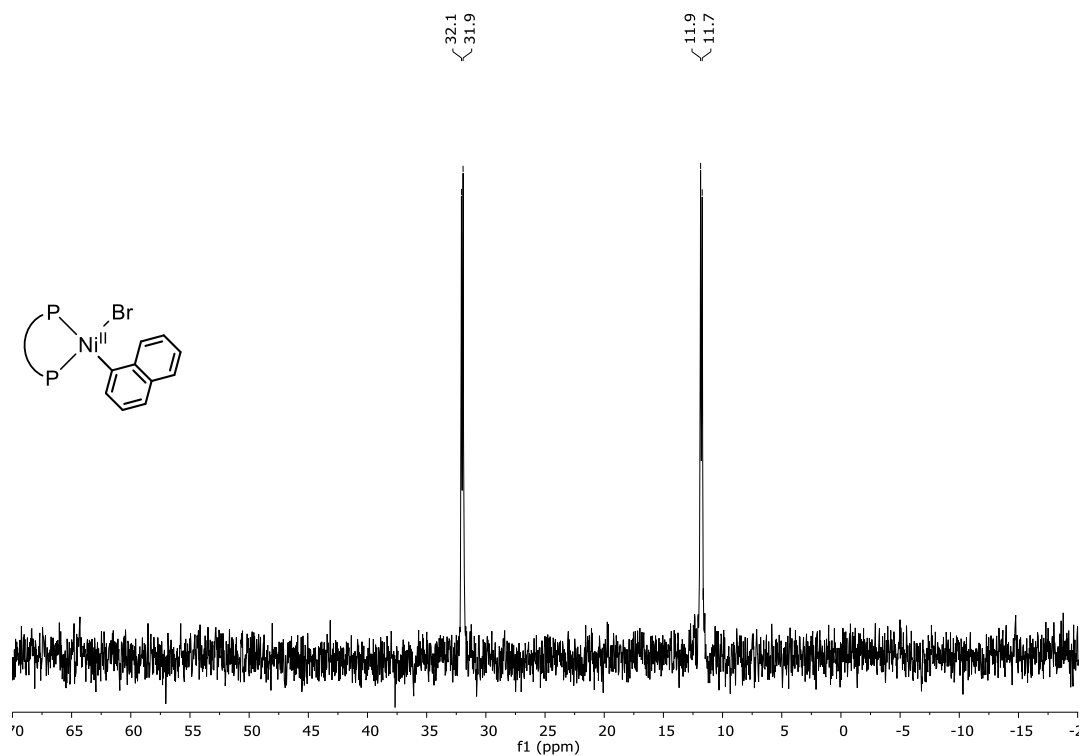

Figure S11.  $^{31}\text{P}$  NMR spectrum ( $\text{C}_6\text{D}_6$ , 202 MHz, 25 °C) of  $(\text{dppf})\text{Ni}^{\text{II}}(1\text{-naphthyl})(\text{Br})$ , **2**.



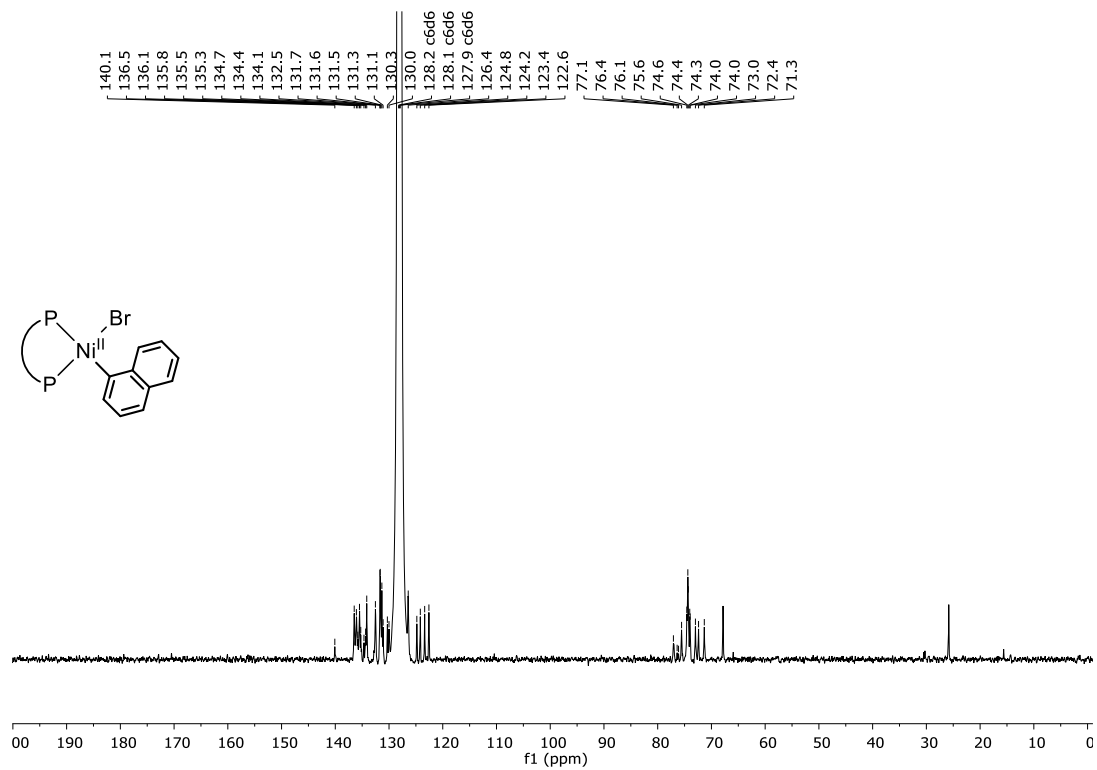

**Figure S12.**  $^{13}\text{C}$  NMR spectrum (C<sub>6</sub>D<sub>6</sub>, 151 MHz, 25 °C) of  $(\text{dppf})\text{Ni}^{\text{II}}(1\text{-naphthyl})(\text{Br})$ , **2**.

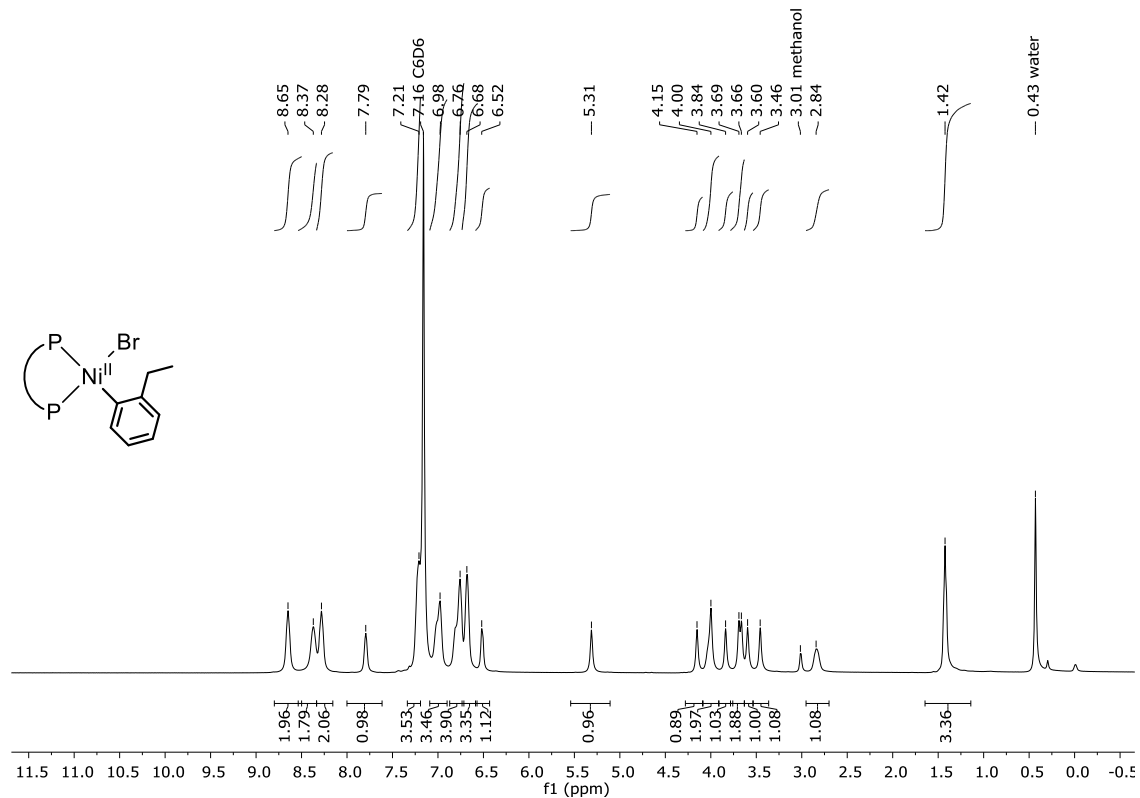

**Figure S13.**  $^1\text{H}$  NMR spectrum (C<sub>6</sub>D<sub>6</sub>, 500 MHz, 25 °C) of  $(\text{dppf})\text{Ni}^{\text{II}}(2\text{-ethylphenyl})(\text{Br})$ , **3**.

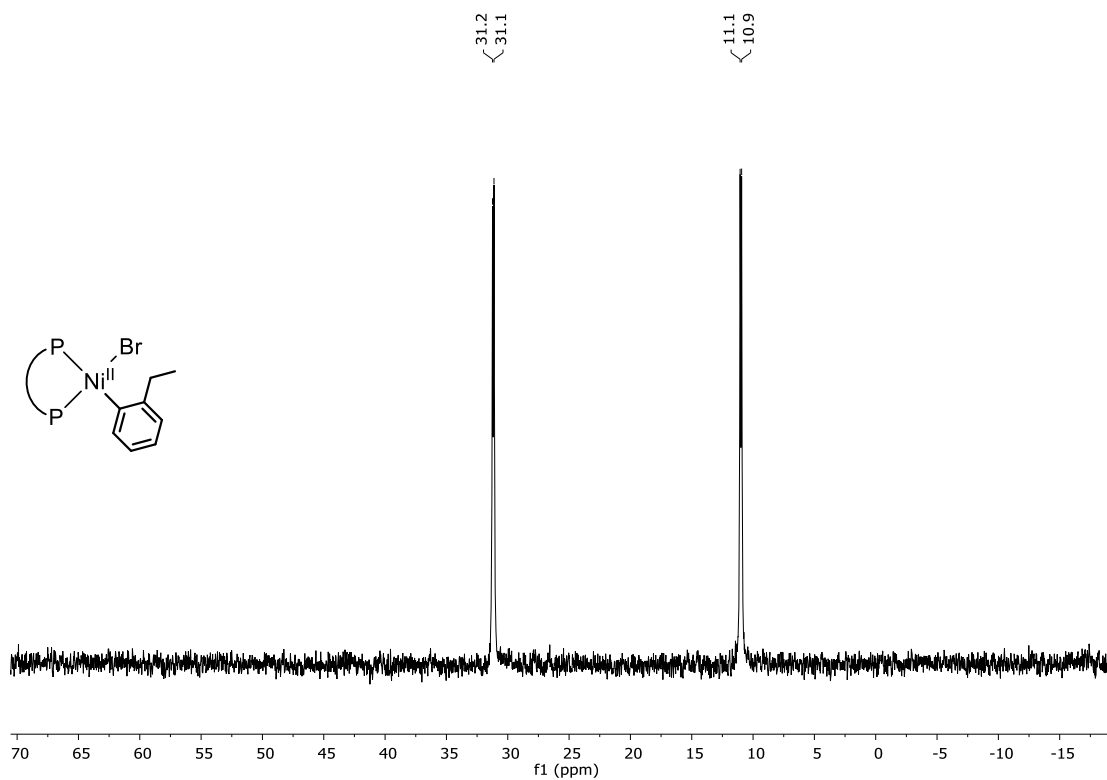

**Figure S14.**  $^{31}\text{P}$  NMR spectrum ( $\text{C}_6\text{D}_6$ , 202 MHz, 25 °C) of  $(\text{dppf})\text{Ni}^{\text{II}}(2\text{-ethylphenyl})(\text{Br})$ , **3**.

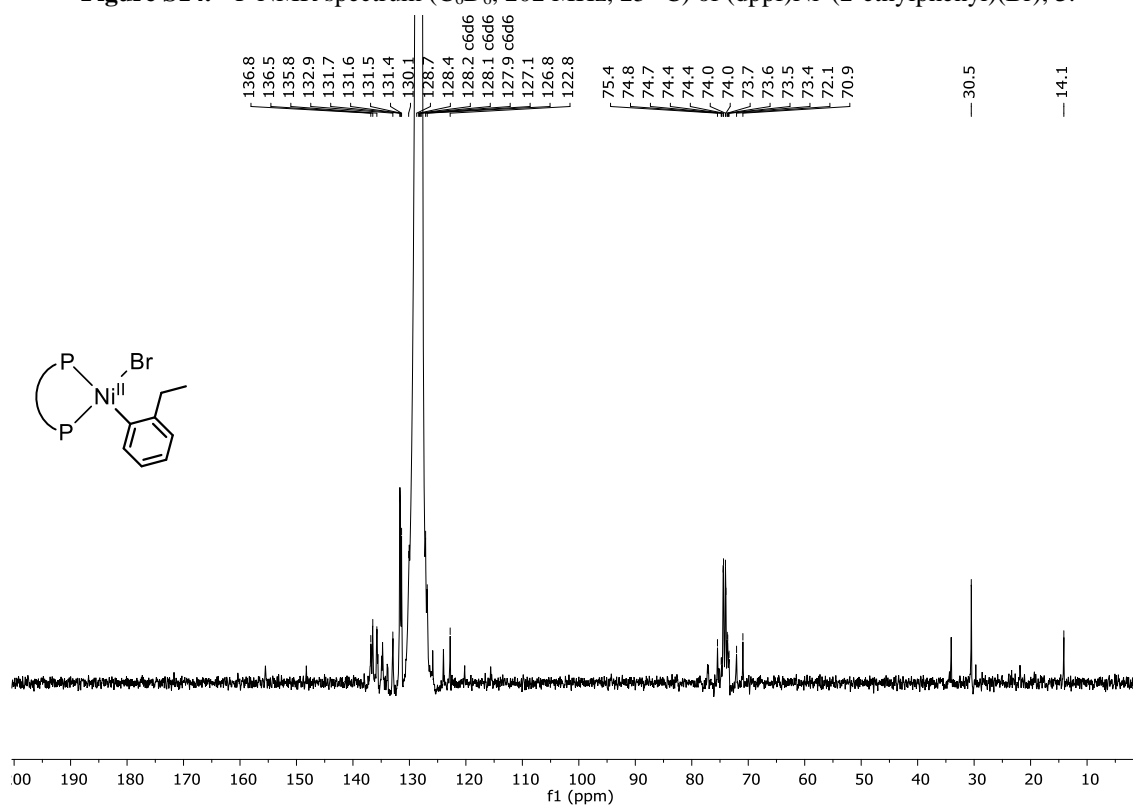

**Figure S15.**  $^{13}\text{C}$  NMR spectrum ( $\text{C}_6\text{D}_6$ , 151 MHz, 25 °C) of  $(\text{dppf})\text{Ni}^{\text{II}}(2\text{-ethylphenyl})(\text{Br})$ , **3**.

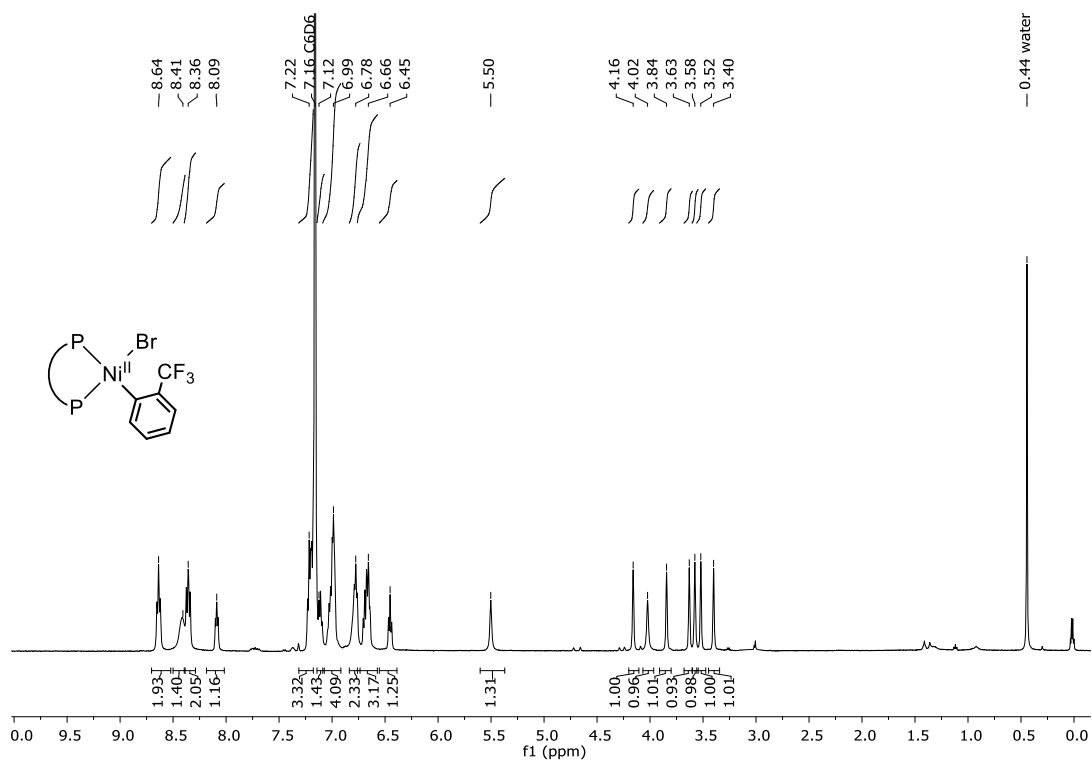

**Figure S16.**  $^1\text{H}$  NMR spectrum ( $\text{C}_6\text{D}_6$ , 500 MHz, 25 °C) of  $(\text{dppf})\text{Ni}^{\text{II}}(2\text{-trifluoromethylphenyl})(\text{Br})$ , **4**.

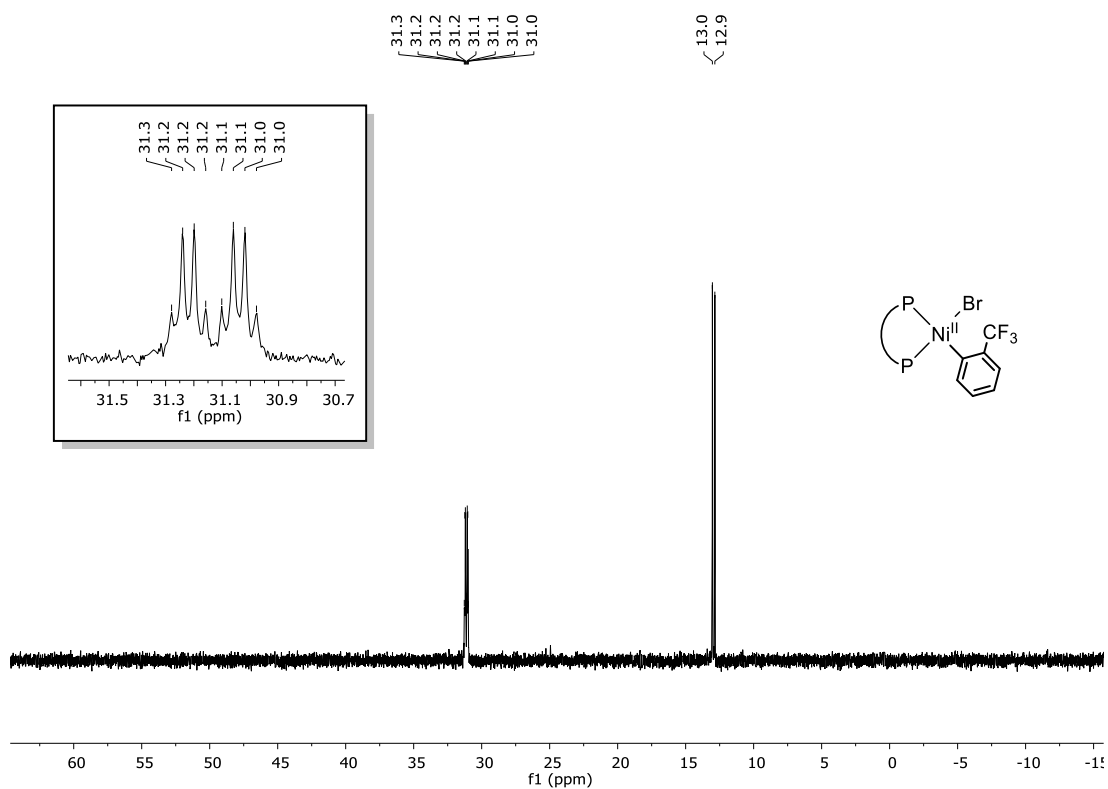

**Figure S17.**  $^{31}\text{P}$  NMR spectrum ( $\text{C}_6\text{D}_6$ , 202 MHz, 25 °C) of  $(\text{dppf})\text{Ni}^{\text{II}}(2\text{-trifluoromethylphenyl})(\text{Br})$ , **4**.

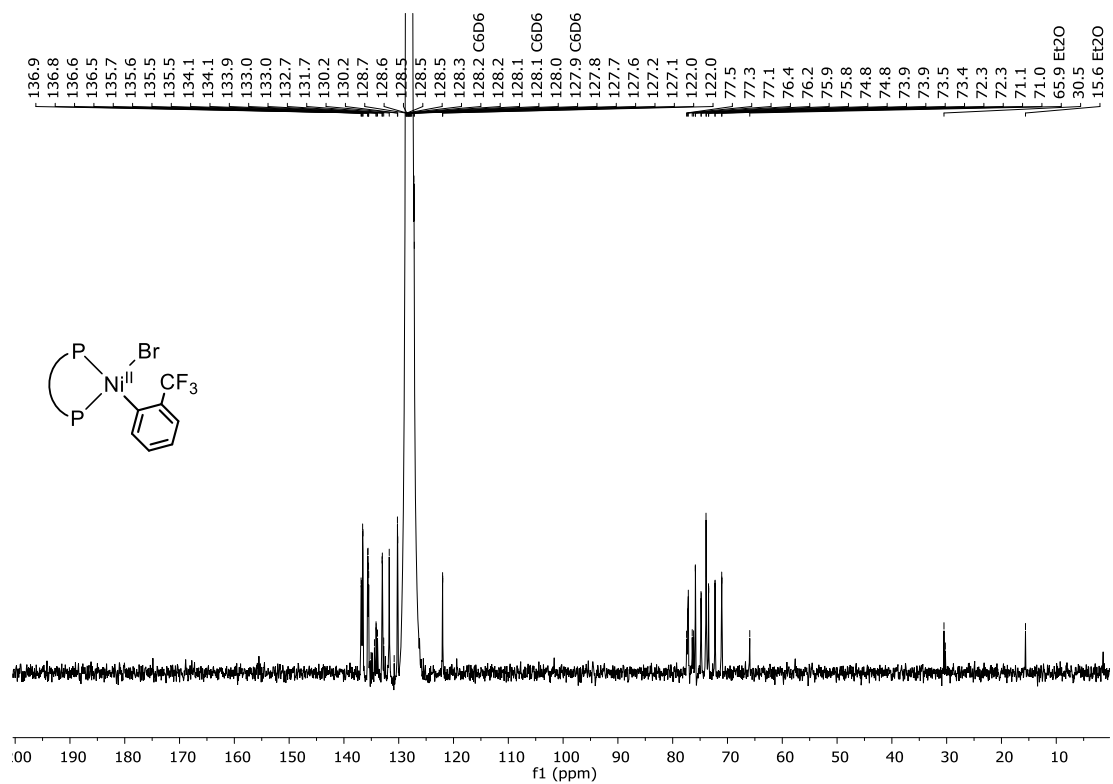

**Figure S18.**  $^{13}\text{C}$  NMR spectrum (C<sub>6</sub>D<sub>6</sub>, 151 MHz, 25 °C) of  $(\text{dppf})\text{Ni}^{\text{II}}(2\text{-trifluoromethylphenyl})(\text{Br})$ , **4**.

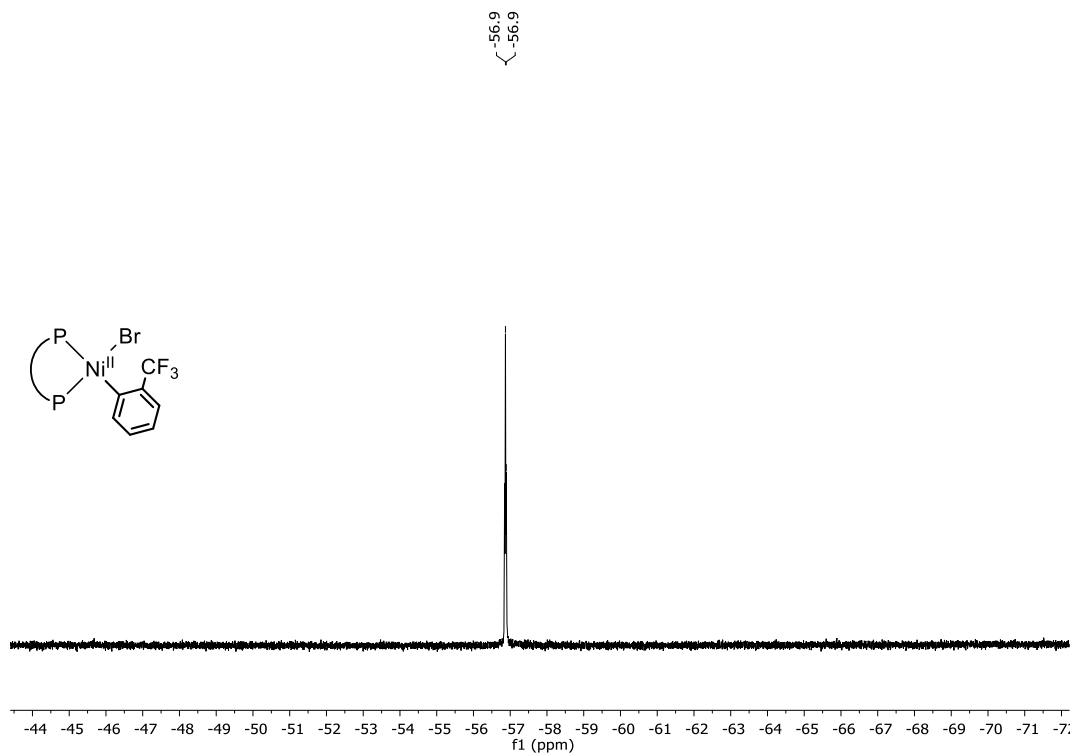

**Figure S19.**  $^{19}\text{F}$  NMR spectrum (C<sub>6</sub>D<sub>6</sub>, 470 MHz, 25 °C) of  $(\text{dppf})\text{Ni}^{\text{II}}(2\text{-trifluoromethylphenyl})(\text{Br})$ , **4**.

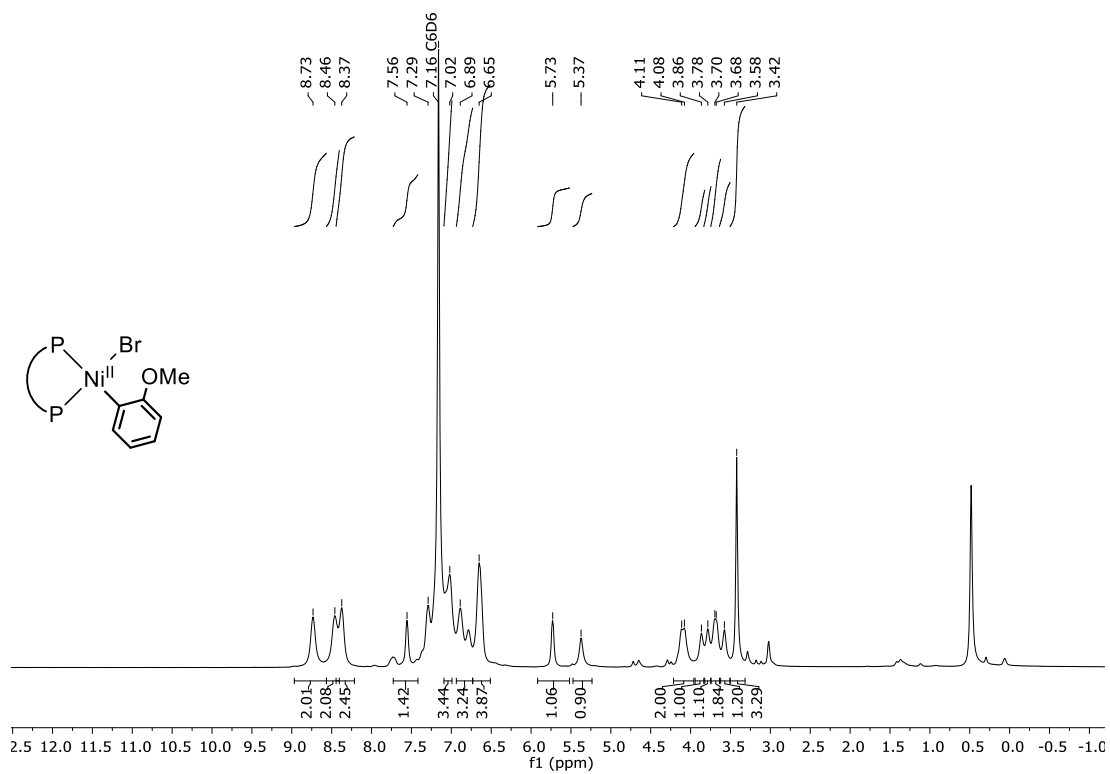

**Figure S20.** <sup>1</sup>H NMR spectrum (C<sub>6</sub>D<sub>6</sub>, 500 MHz, 25 °C) of (dppf)Ni<sup>II</sup>(2-methoxyphenyl)(Br) **5**.

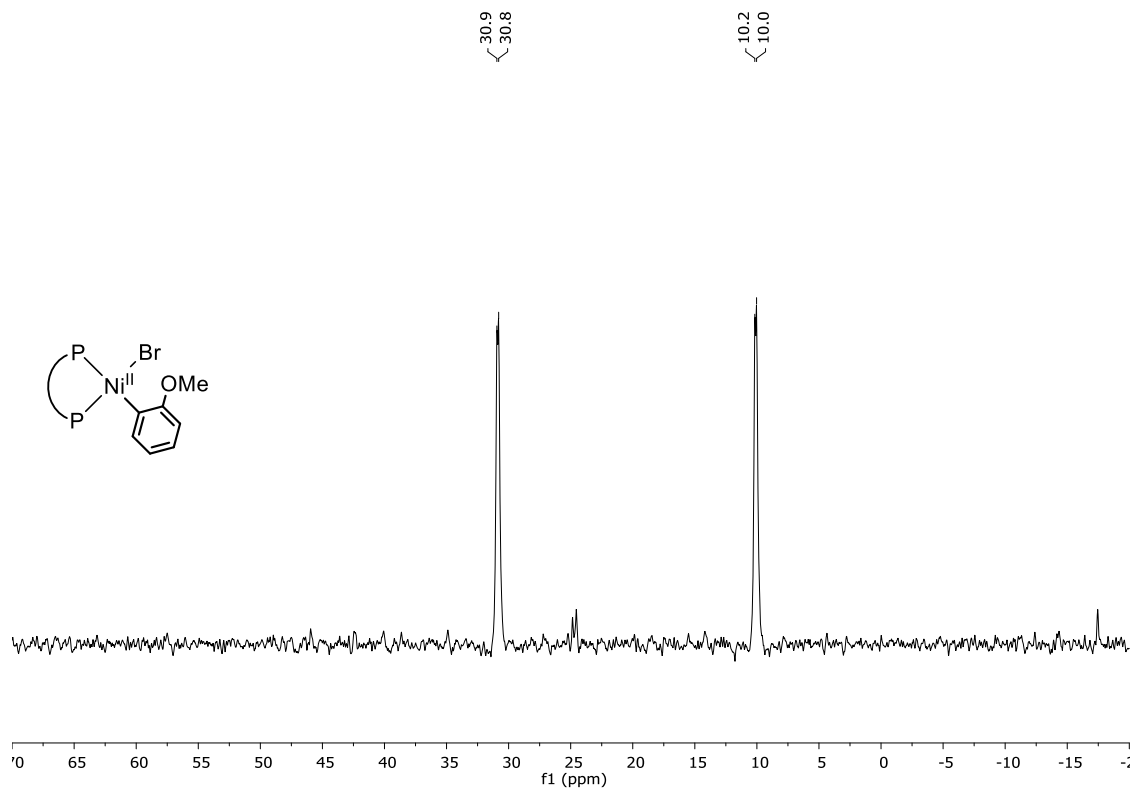

**Figure S21.** <sup>31</sup>P NMR spectrum (C<sub>6</sub>D<sub>6</sub>, 202 MHz, 25 °C) of (dppf)Ni<sup>II</sup>(2-methoxyphenyl)(Br) **5**.

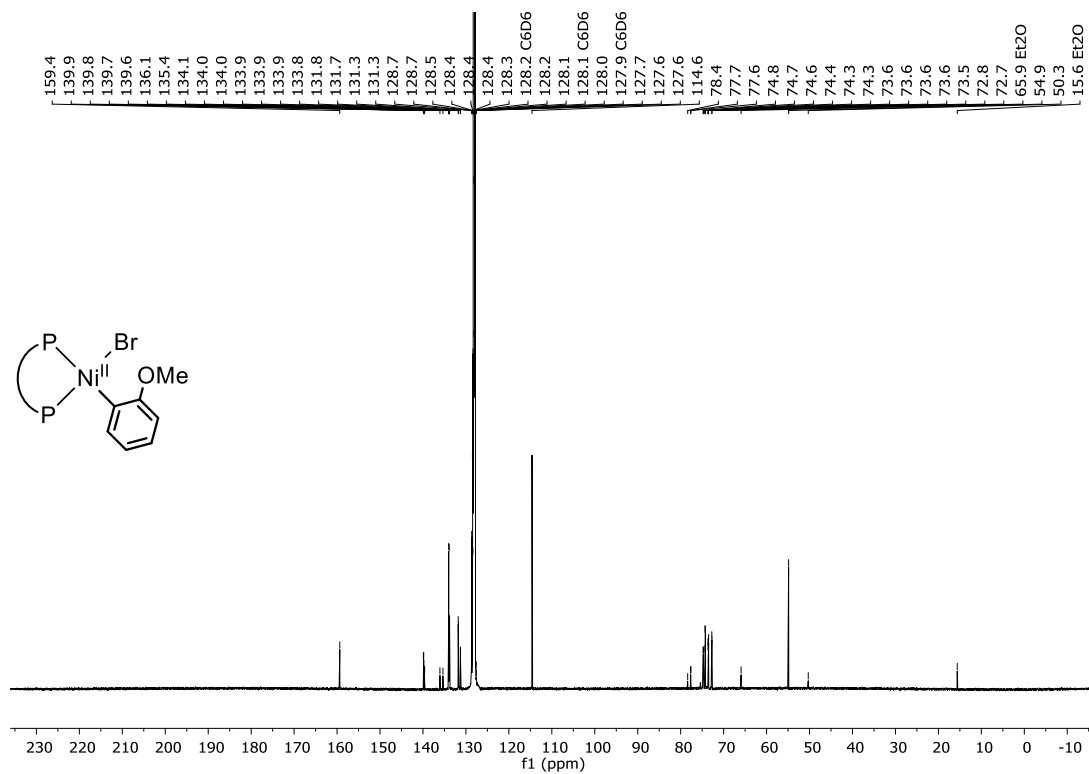

**Figure S22.**  $^{13}\text{C}$  NMR spectrum (C<sub>6</sub>D<sub>6</sub>, 151 MHz, 25 °C) of  $(\text{dppf})\text{Ni}^{\text{II}}(2\text{-methoxyphenyl})(\text{Br})$ , **5**.

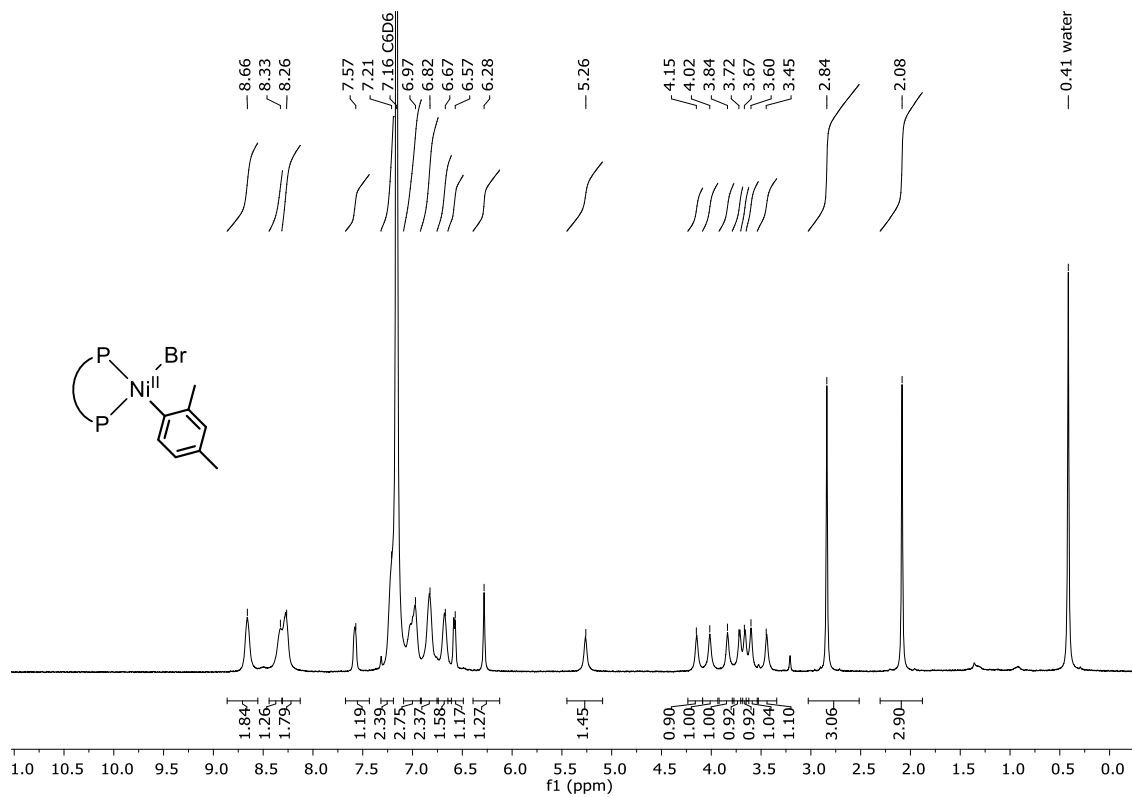

**Figure S23.**  $^1\text{H}$  NMR spectrum (C<sub>6</sub>D<sub>6</sub>, 500 MHz, 25 °C) of  $(\text{dppf})\text{Ni}^{\text{II}}(2,4\text{-xylyl})(\text{Br})$ , **6**.

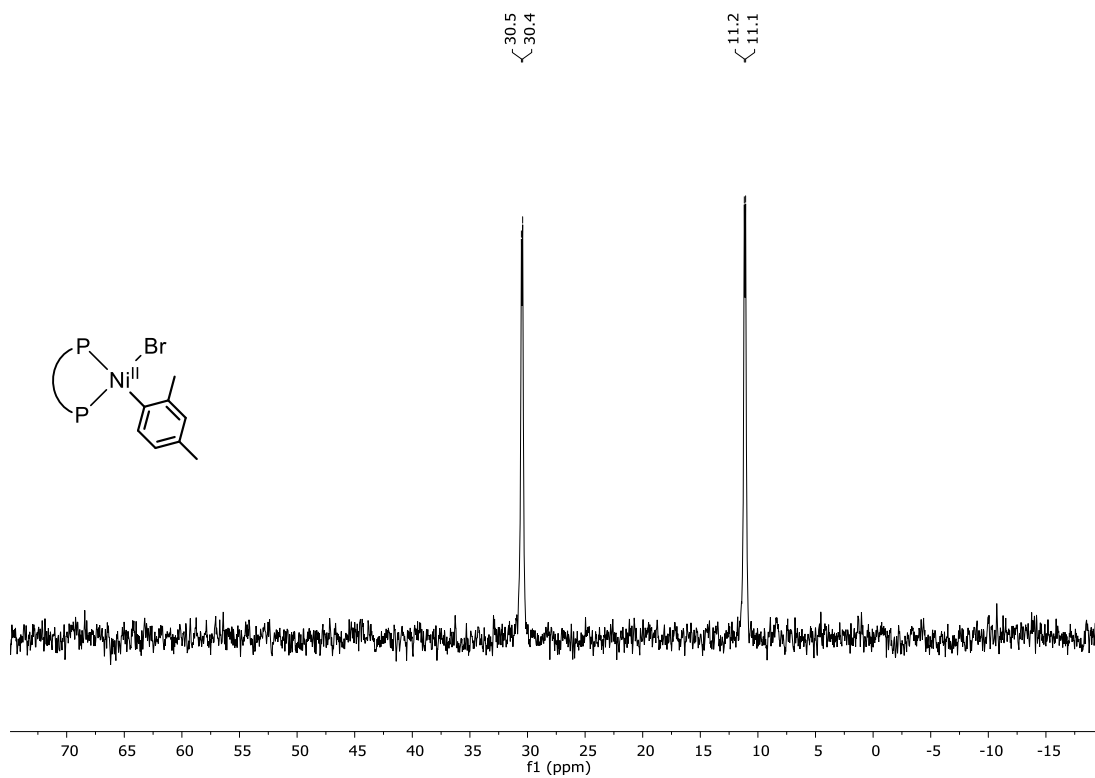

**Figure S24.**  $^{31}\text{P}$  NMR spectrum ( $\text{C}_6\text{D}_6$ , 202 MHz, 25 °C) of  $(\text{dppf})\text{Ni}^{\text{II}}(2,4\text{-xylyl})(\text{Br})$ , **6**.

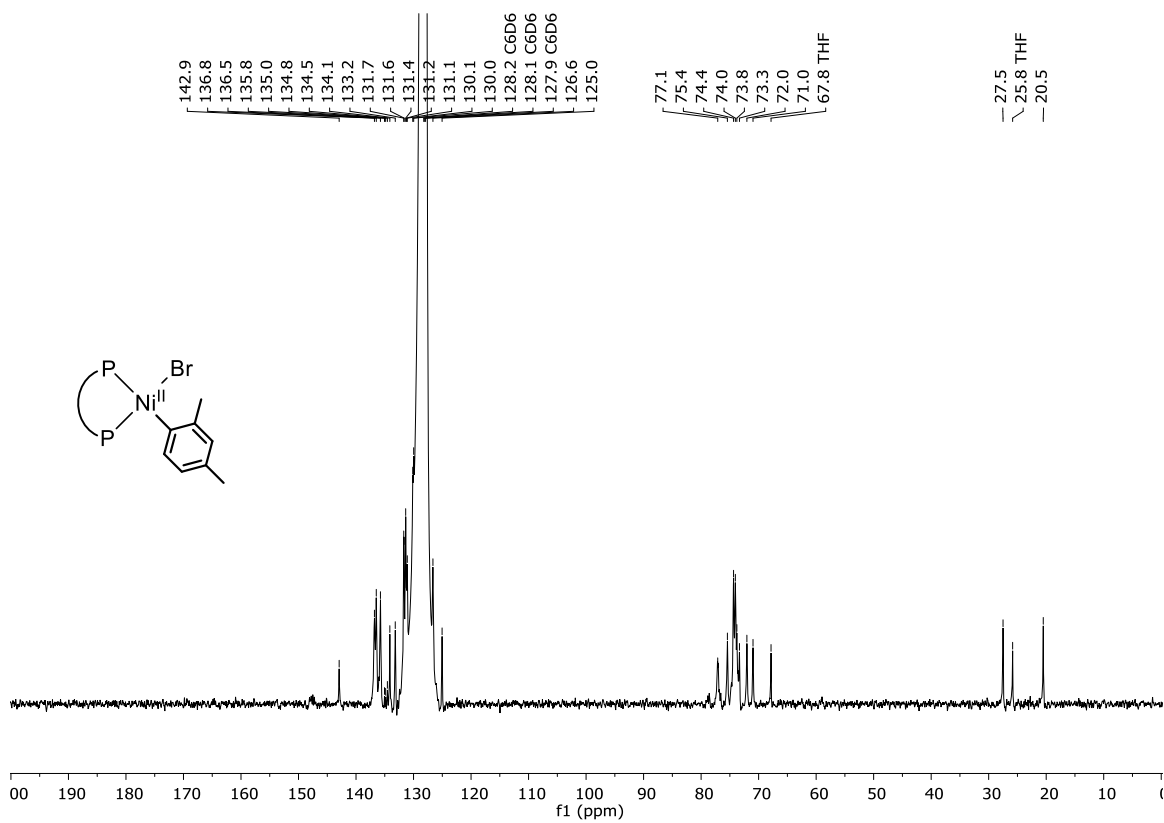

**Figure S25.**  $^{13}\text{C}$  NMR spectrum ( $\text{C}_6\text{D}_6$ , 151 MHz, 25 °C) of  $(\text{dppf})\text{Ni}^{\text{II}}(2,4\text{-xylyl})(\text{Br})$ , **6**.

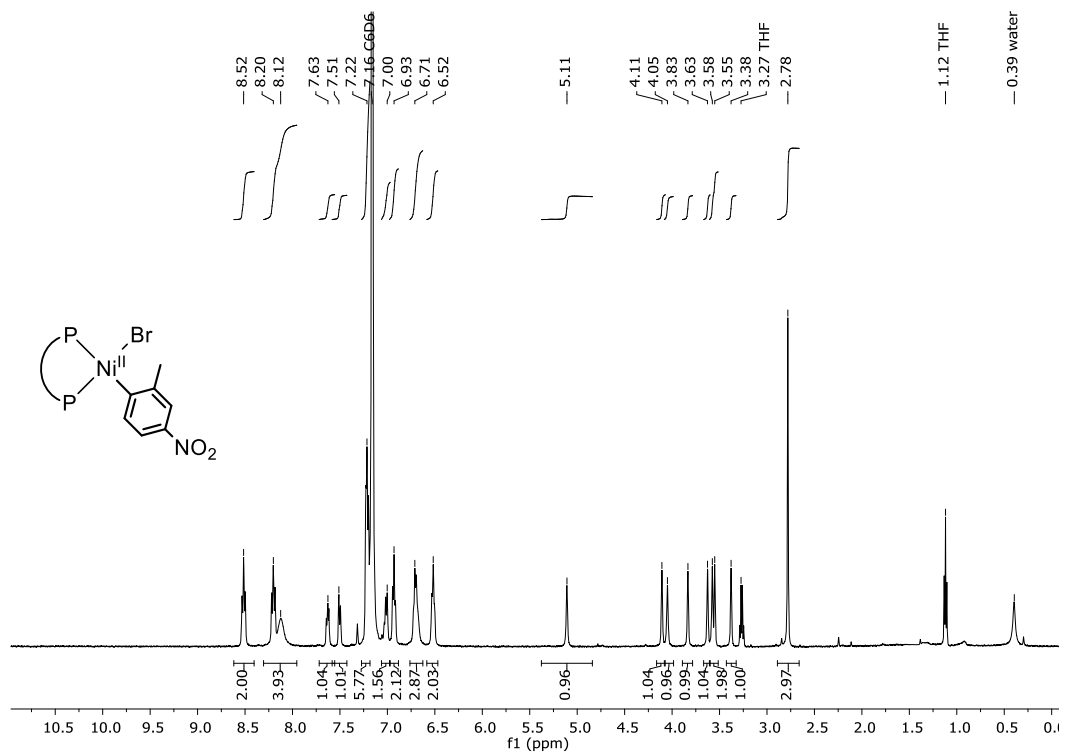

**Figure S26.**  $^1\text{H}$  NMR spectrum (C<sub>6</sub>D<sub>6</sub>, 500 MHz, 25 °C) of  $(\text{dppf})\text{Ni}^{\text{II}}(2\text{-methyl-4-nitrophenyl})(\text{Br})$ , **7**.

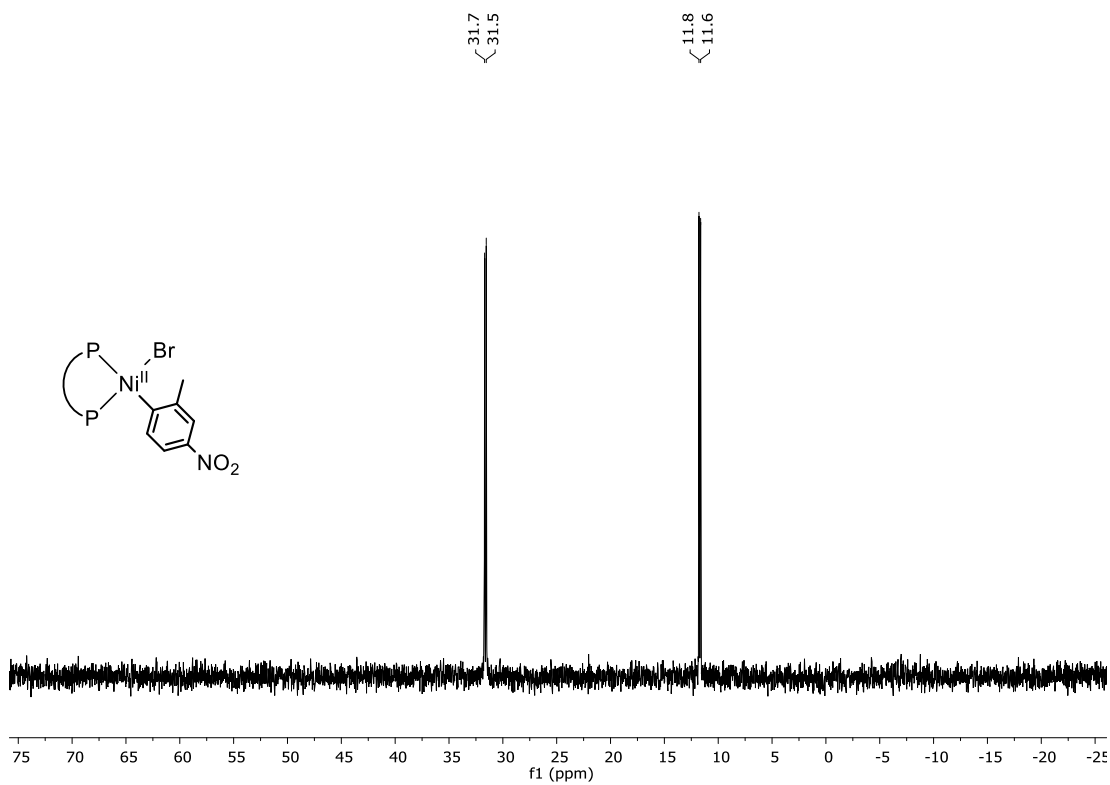

**Figure S27.**  $^{31}\text{P}$  NMR spectrum (C<sub>6</sub>D<sub>6</sub>, 202 MHz, 25 °C) of  $(\text{dppf})\text{Ni}^{\text{II}}(2\text{-methyl-4-nitrophenyl})(\text{Br})$ , **7**.



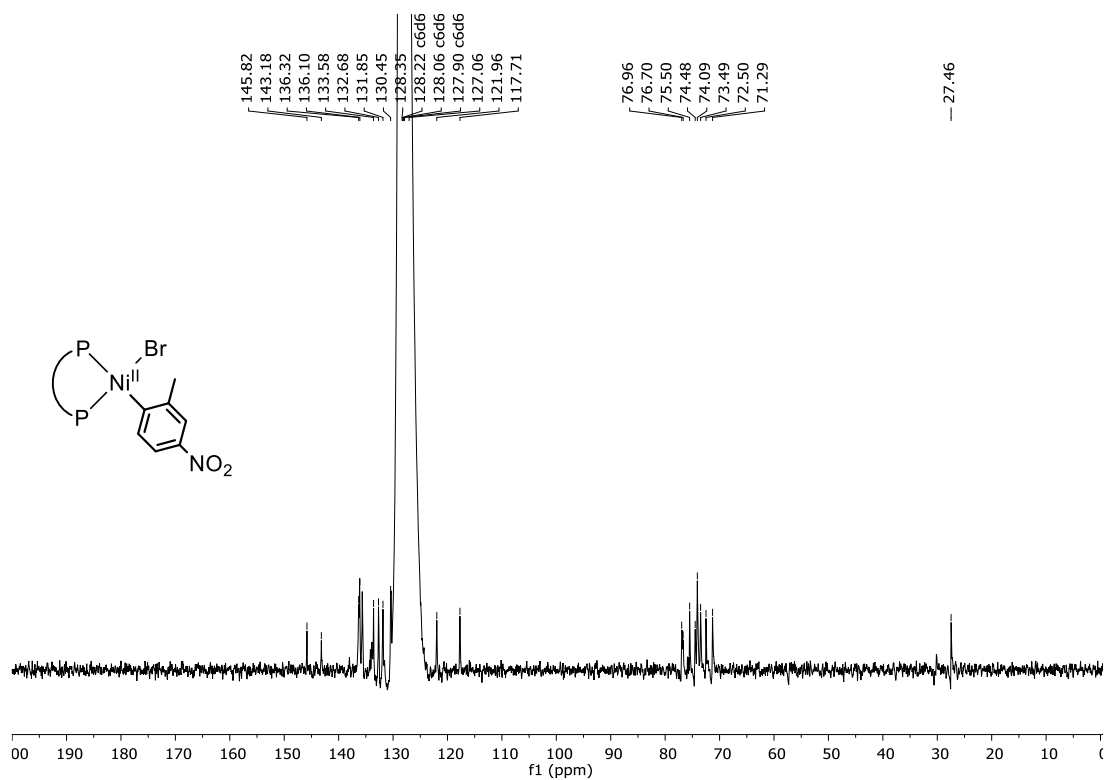

**Figure S28.** <sup>13</sup>C NMR spectrum (C<sub>6</sub>D<sub>6</sub>, 151 MHz, 25 °C) of (dppf)Ni<sup>II</sup>(2-methyl-4-nitrophenyl)(Br), **7**.

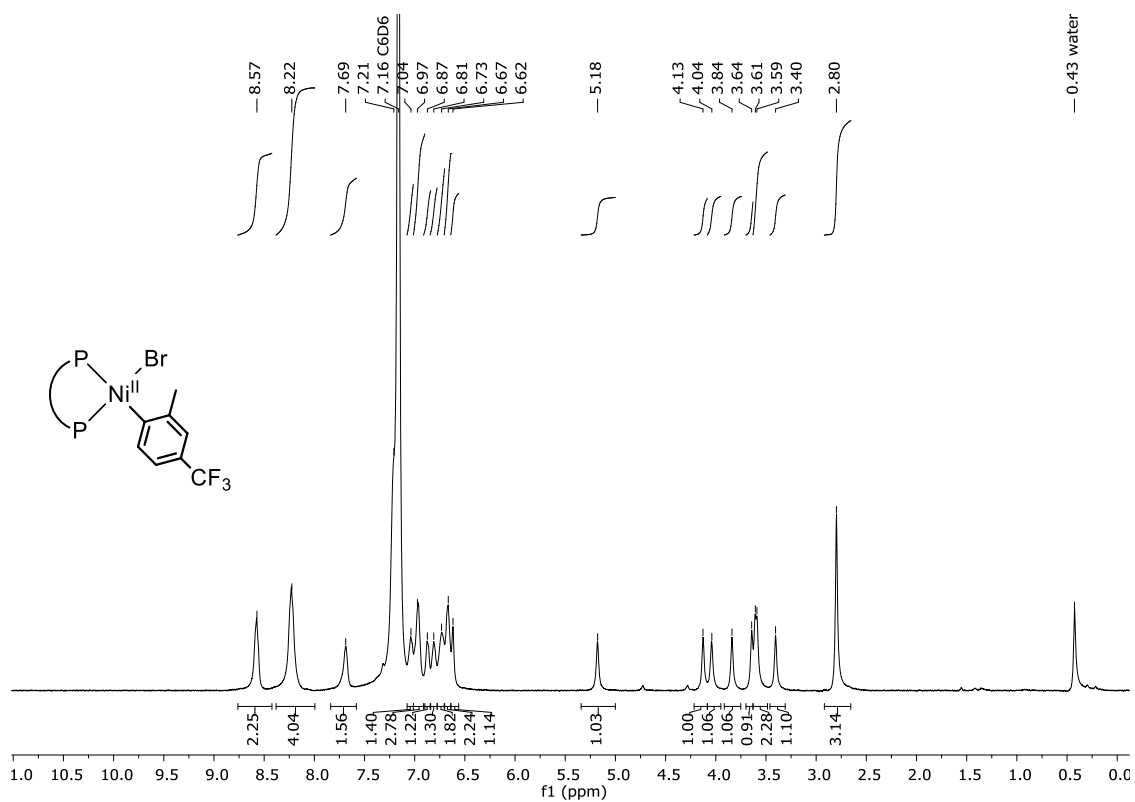

**Figure S29.** <sup>1</sup>H NMR spectrum (C<sub>6</sub>D<sub>6</sub>, 500 MHz, 25 °C) of (dppf)Ni<sup>II</sup>(2-methyl-4-trifluoromethylphenyl)(Br), **8**.

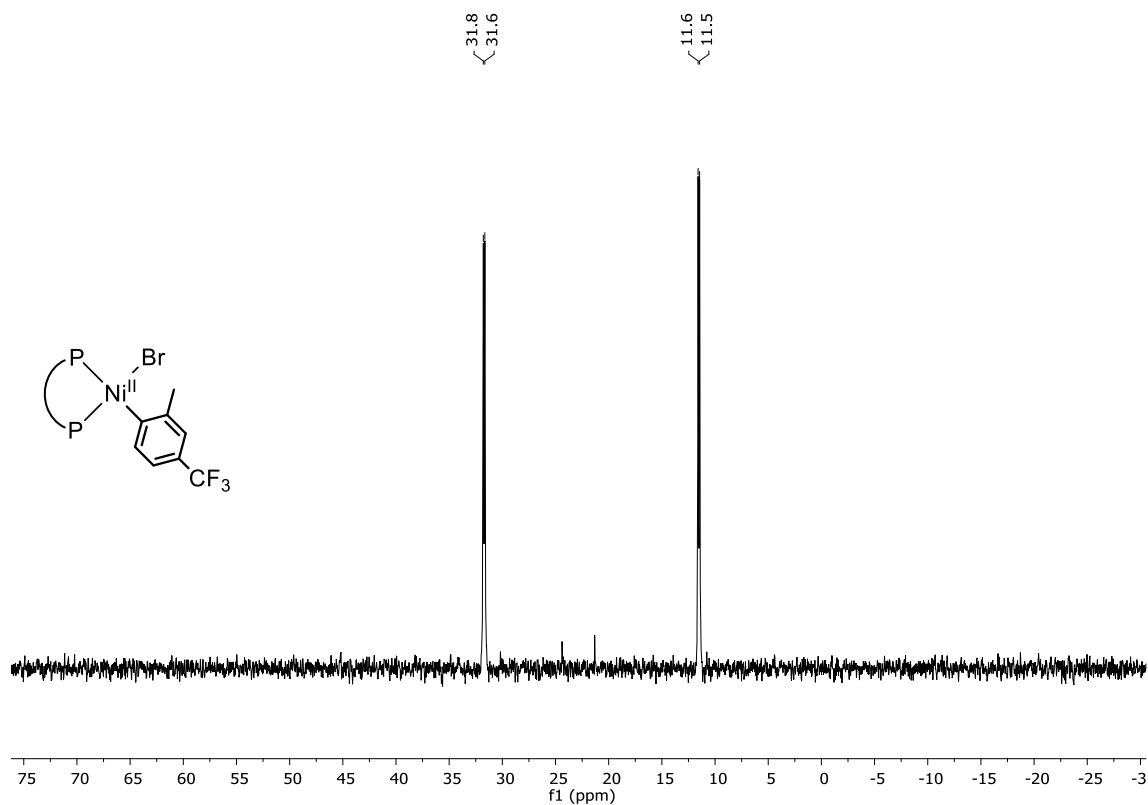

**Figure S30.**  $^{31}\text{P}$  NMR spectrum ( $\text{C}_6\text{D}_6$ , 202 MHz, 25 °C) of  $(\text{dppf})\text{Ni}^{\text{II}}(2\text{-methyl-4-trifluoromethylphenyl})(\text{Br})$ , **8**.

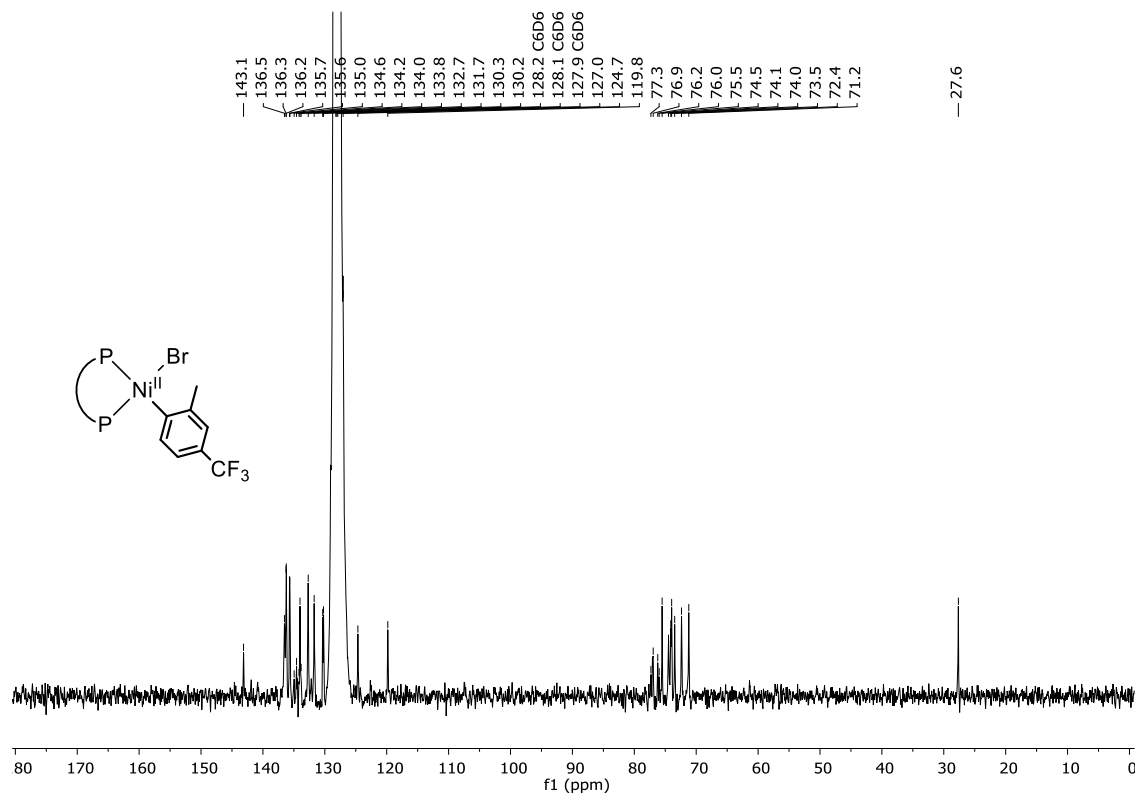

**Figure S31.**  $^{13}\text{C}$  NMR spectrum ( $\text{C}_6\text{D}_6$ , 151 MHz, 25 °C) of  $(\text{dppf})\text{Ni}^{\text{II}}(2\text{-methyl-4-trifluoromethylphenyl})(\text{Br})$ , **8**.

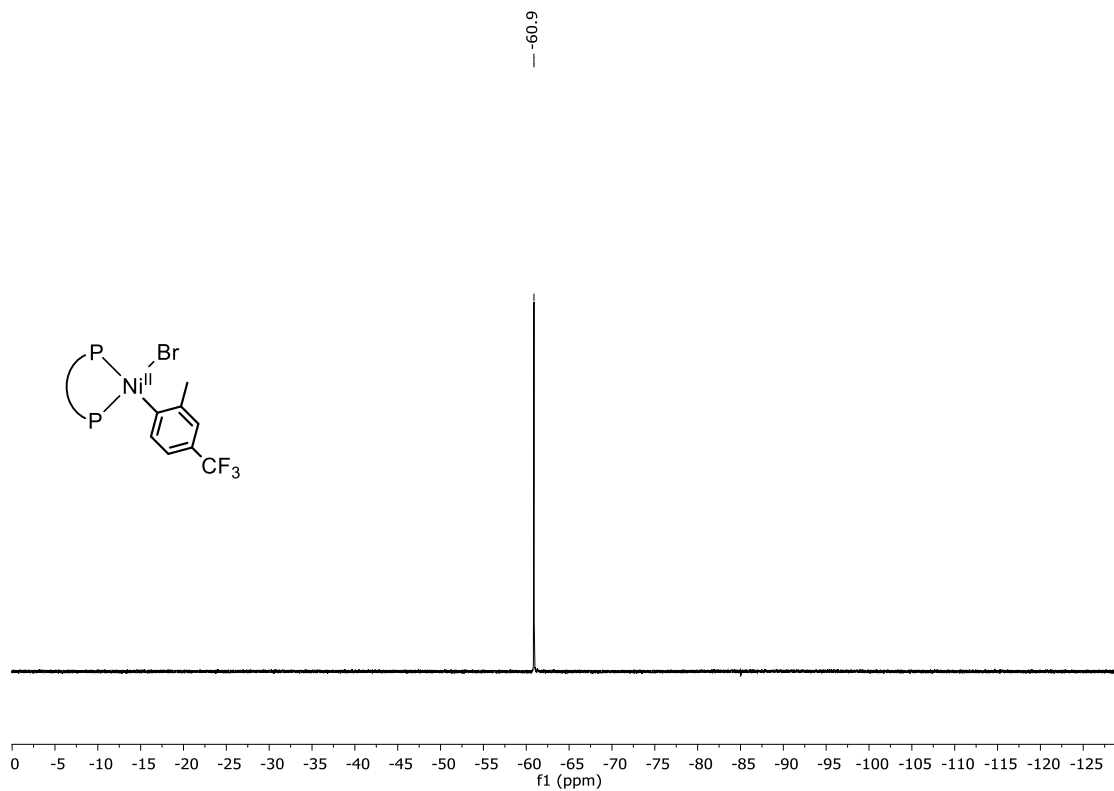

**Figure S32.**  $^{19}\text{F}$  NMR spectrum (C<sub>6</sub>D<sub>6</sub>, 470 MHz, 25 °C) of (dppf)Ni<sup>II</sup>(2-methyl-4-trifluoromethylphenyl)(Br), **8**.

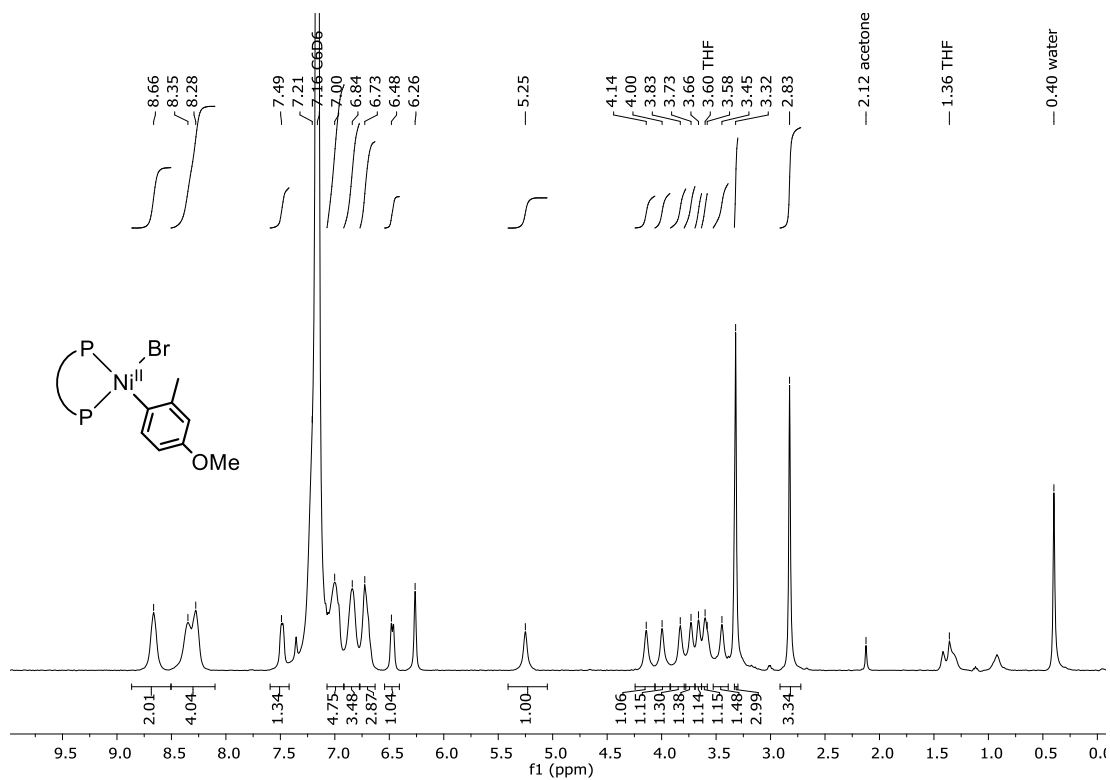

**Figure S33.**  $^1\text{H}$  NMR spectrum (C<sub>6</sub>D<sub>6</sub>, 400 MHz, 25 °C) of (dppf)Ni<sup>II</sup>(2-methyl-4-methoxyphenyl)(Br), **9**.

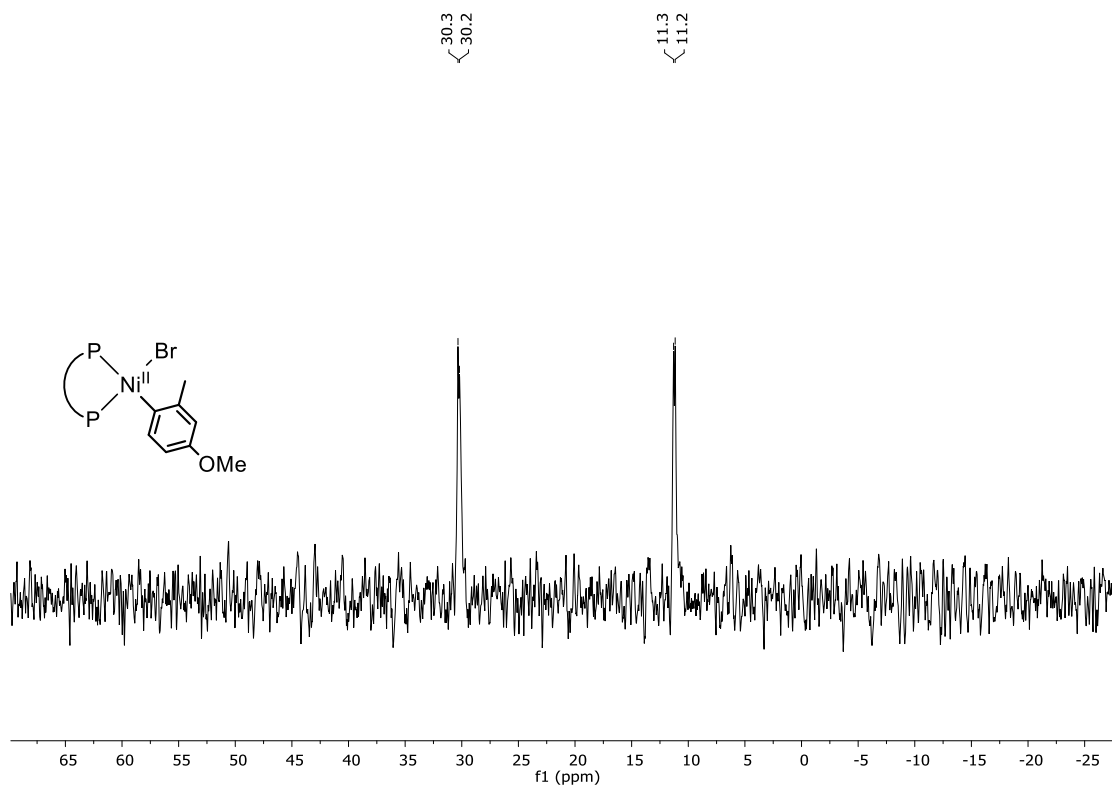

**Figure S34.**  $^{31}\text{P}$  NMR spectrum (C<sub>6</sub>D<sub>6</sub>, 162 MHz, 25 °C) of (dppf)Ni<sup>II</sup>(2-methyl-4-methoxyphenyl)(Br), **9**.

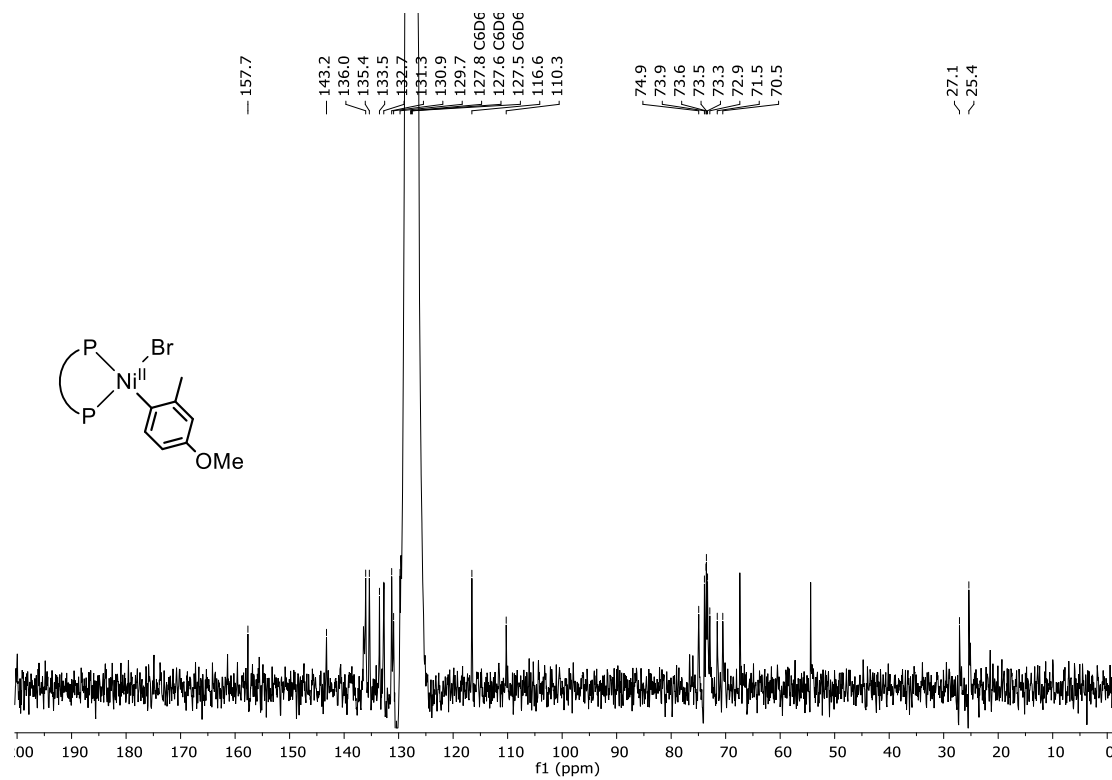

**Figure S35.**  $^{13}\text{C}$  NMR spectrum (C<sub>6</sub>D<sub>6</sub>, 151 MHz, 25 °C) of (dppf)Ni<sup>II</sup>(2-methyl-4-methoxyphenyl)(Br), **9**.

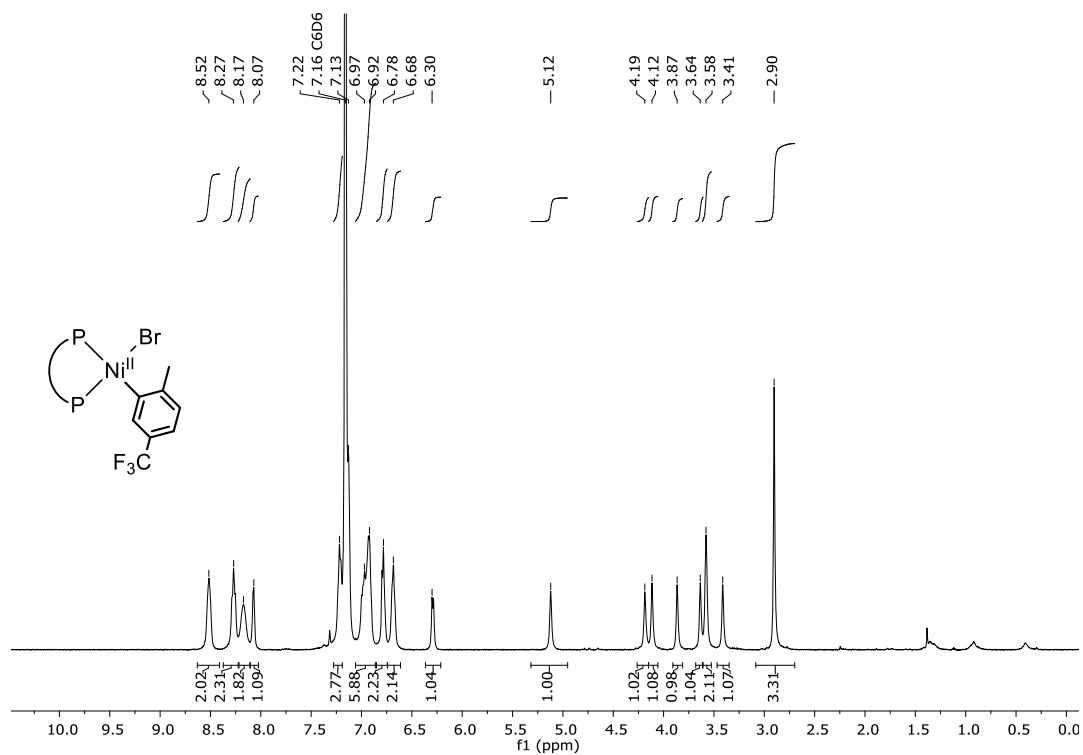

**Figure S36.**  $^1\text{H}$  NMR spectrum ( $\text{C}_6\text{D}_6$ , 500 MHz, 25 °C) of  $(\text{dppf})\text{Ni}^{\text{II}}(2\text{-methyl-5-trifluoromethylphenyl})(\text{Br})$ , **10**.

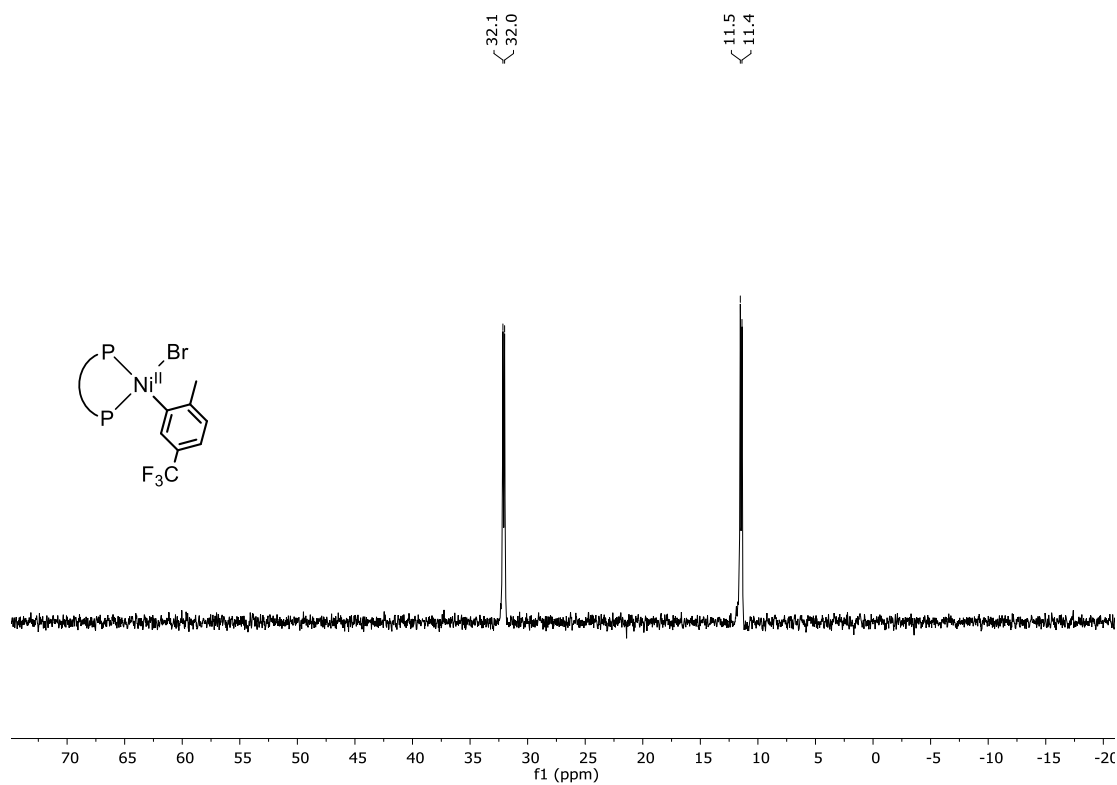

**Figure S37.**  $^{31}\text{P}$  NMR spectrum ( $\text{C}_6\text{D}_6$ , 202 MHz, 25 °C) of  $(\text{dppf})\text{Ni}^{\text{II}}(2\text{-methyl-5-trifluoromethylphenyl})(\text{Br})$ , **10**.

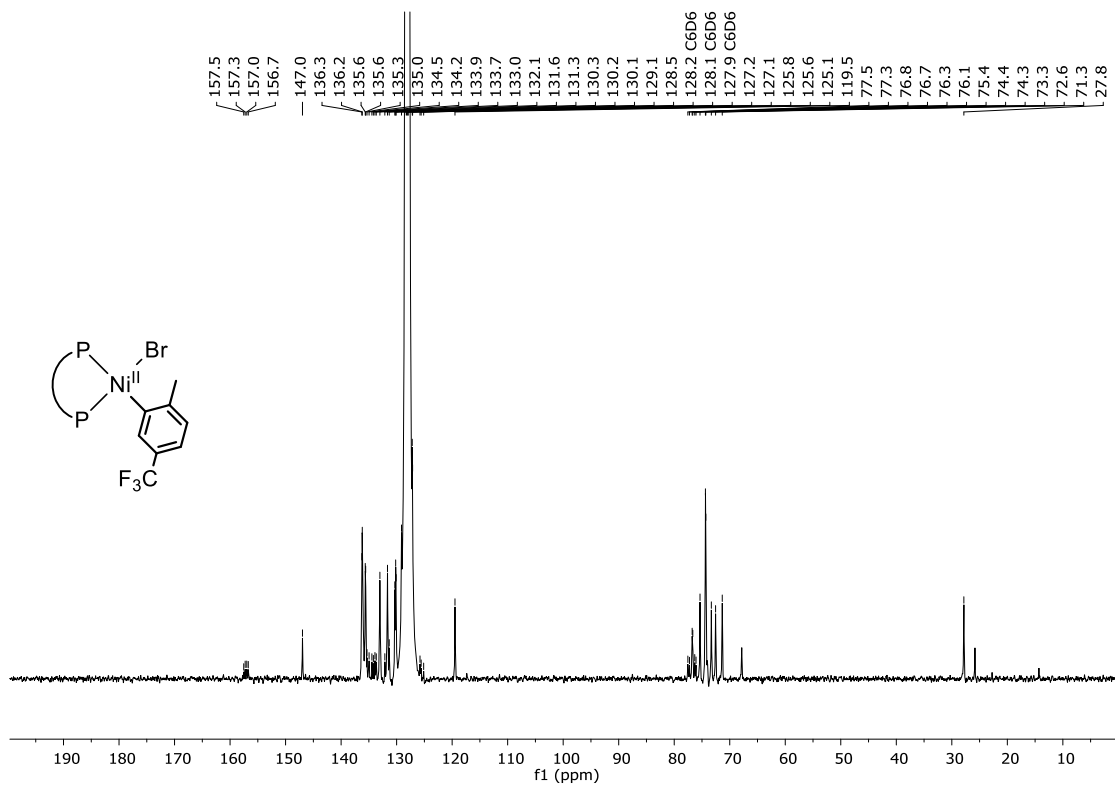

**Figure S38.**  $^{13}\text{C}$  NMR spectrum (C<sub>6</sub>D<sub>6</sub>, 151 MHz, 25 °C) of  $(\text{dppf})\text{Ni}^{\text{II}}(2\text{-methyl-5-trifluoromethylphenyl})(\text{Br})$ , **10**.

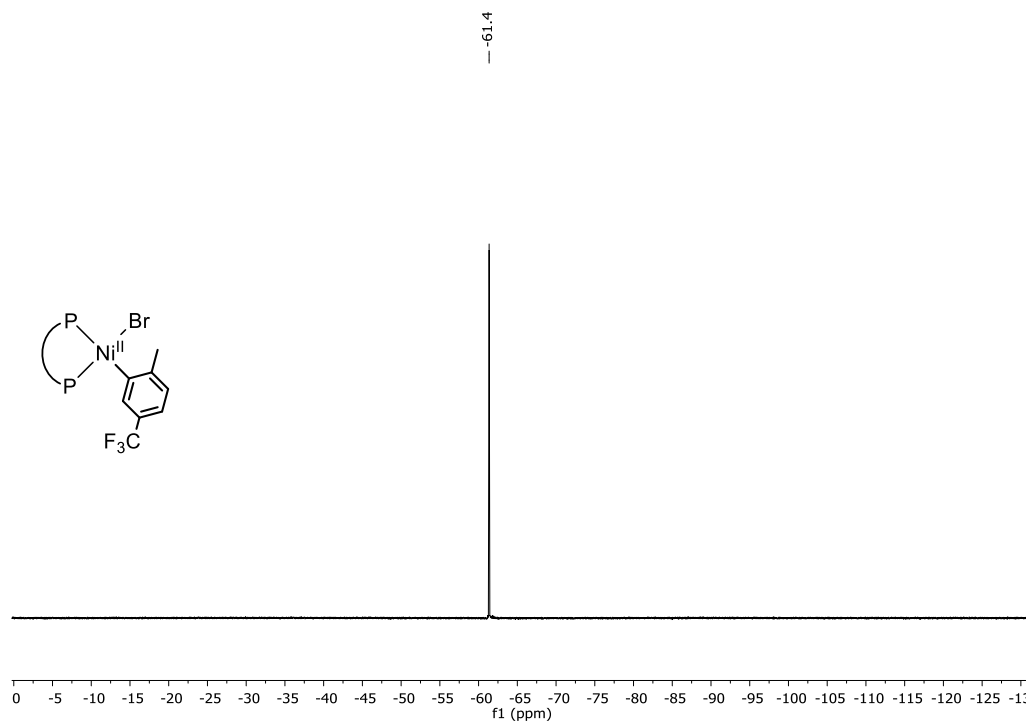

**Figure S39.**  $^{19}\text{F}$  NMR spectrum (C<sub>6</sub>D<sub>6</sub>, 470 MHz, 25 °C) of  $(\text{dppf})\text{Ni}^{\text{II}}(2\text{-methyl-5-trifluoromethylphenyl})(\text{Br})$ , **10**.

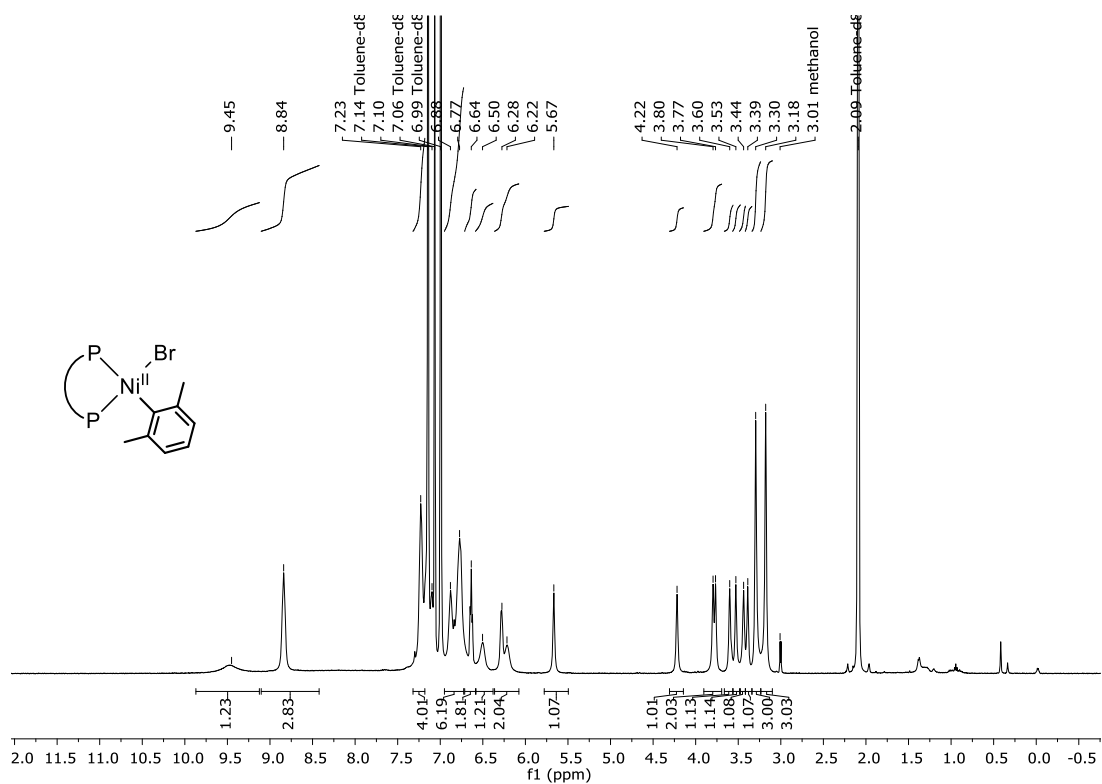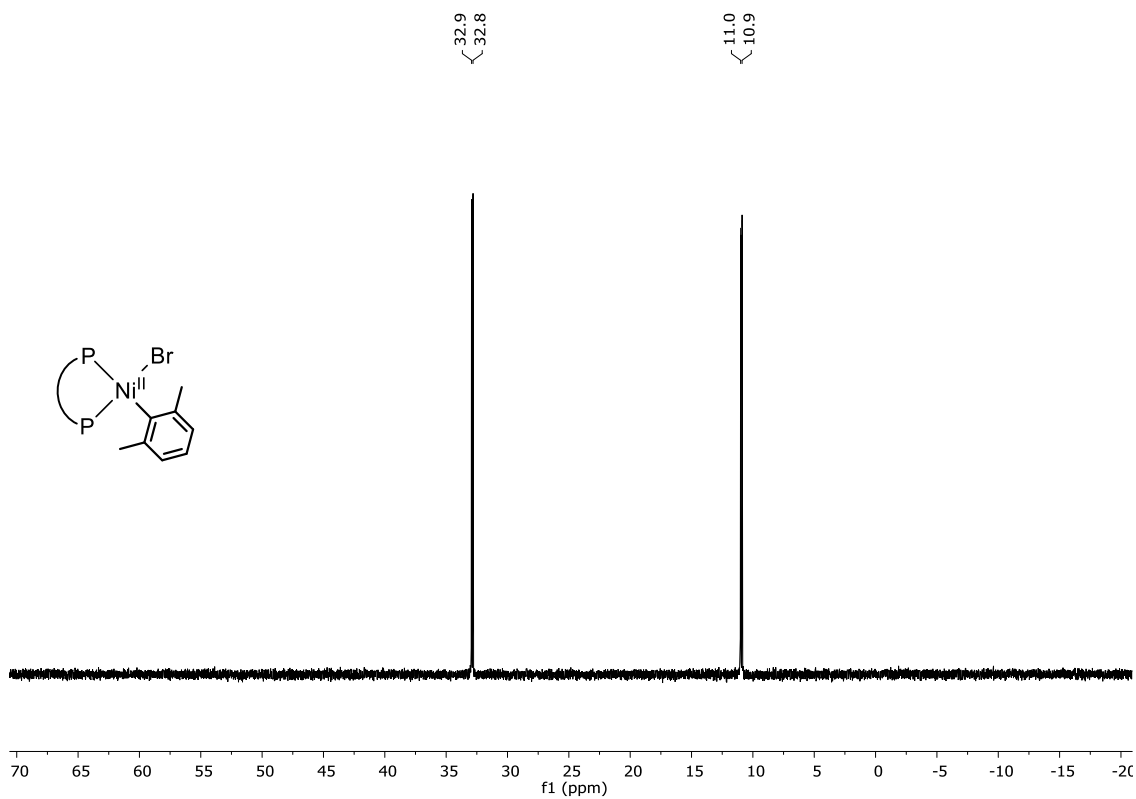

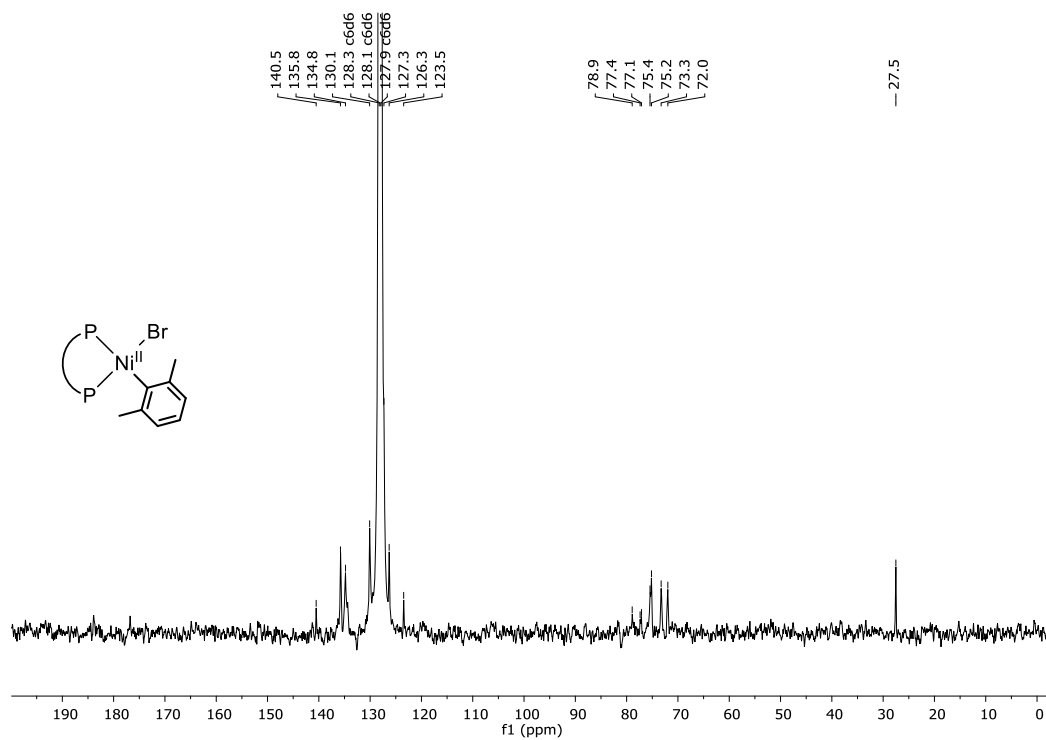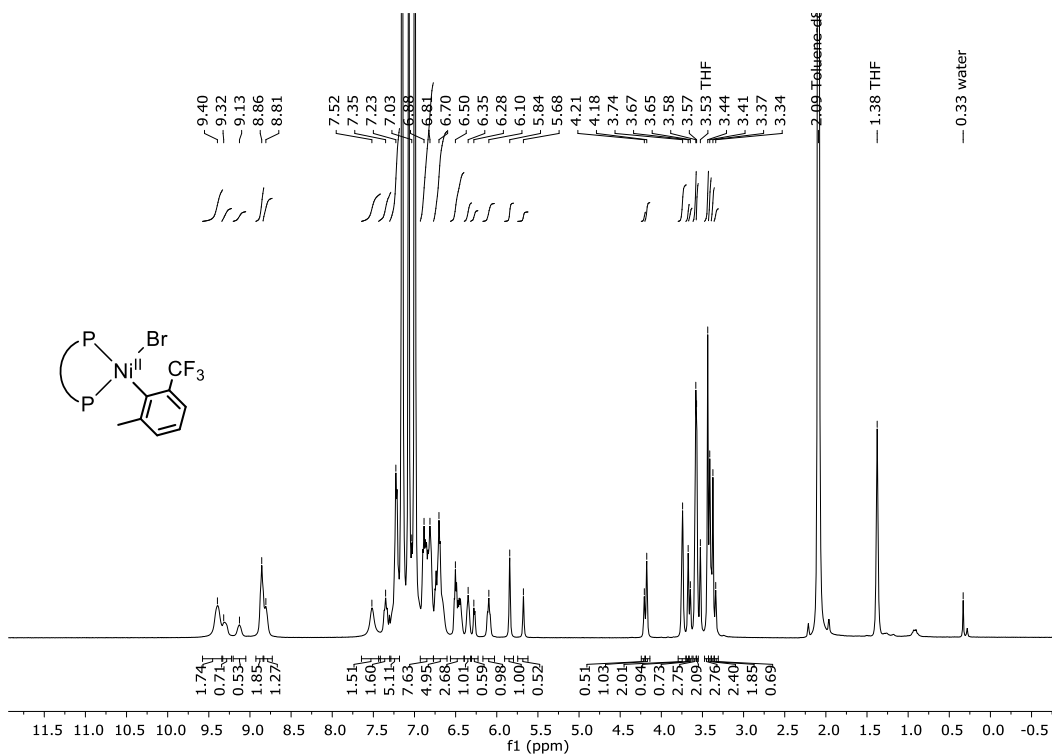

**Figure S43.**  $^1\text{H}$  NMR spectrum (*d*<sub>8</sub>-toluene, 500 MHz, -50 °C) of (dppf)Ni<sup>II</sup>(2-trifluoromethyl-6-methylphenyl)(Br), **12**.



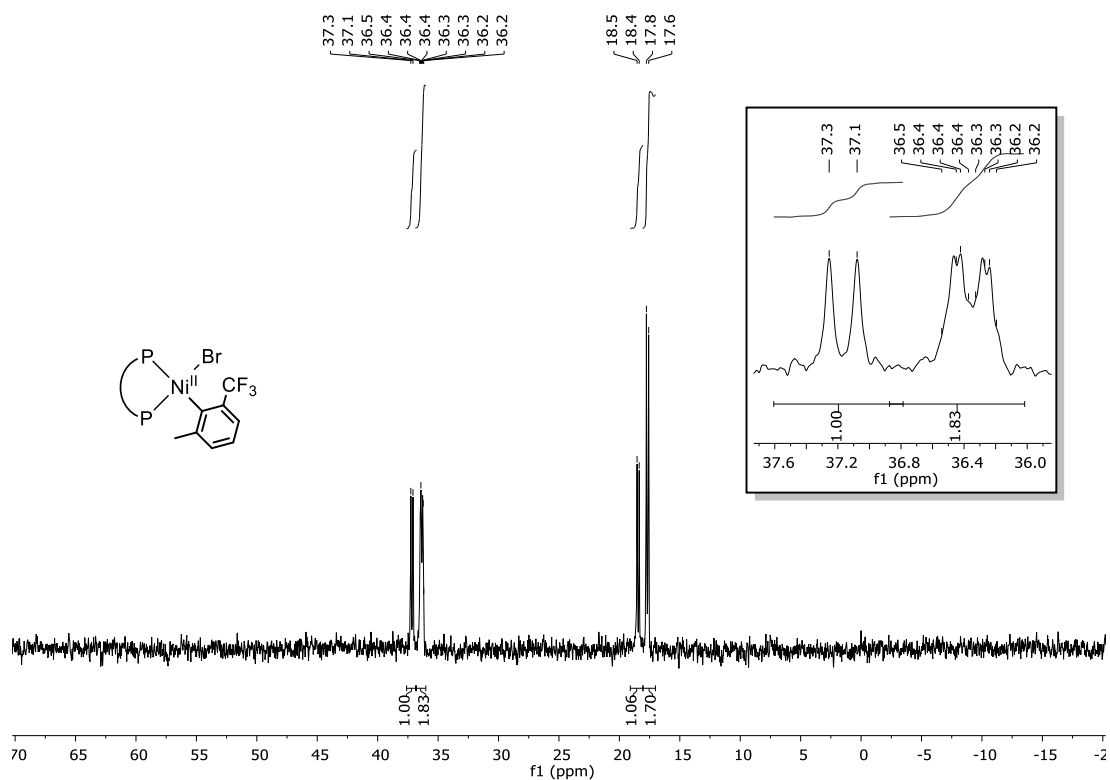

**Figure S44.**  $^{31}\text{P}$  NMR spectrum ( $d_8$ -toluene, 202 MHz,  $-50\text{ }^\circ\text{C}$ ) of  $(\text{dppf})\text{Ni}^{\text{II}}(2\text{-trifluoromethyl-6-methylphenyl})(\text{Br})$ , **12**.

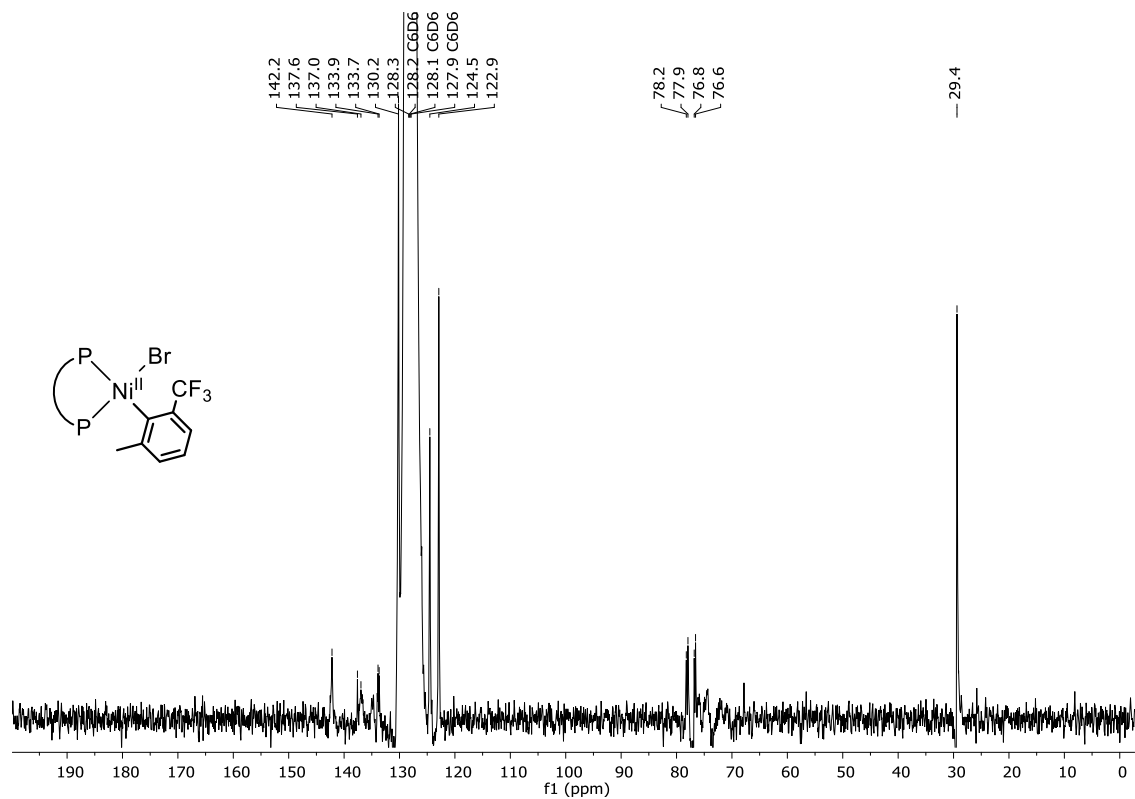

**Figure S45.**  $^{13}\text{C}$  NMR spectrum ( $\text{C}_6\text{D}_6$ , 151 MHz,  $25\text{ }^\circ\text{C}$ ) of  $(\text{dppf})\text{Ni}^{\text{II}}(2\text{-trifluoromethyl-6-methylphenyl})(\text{Br})$ , **12**.

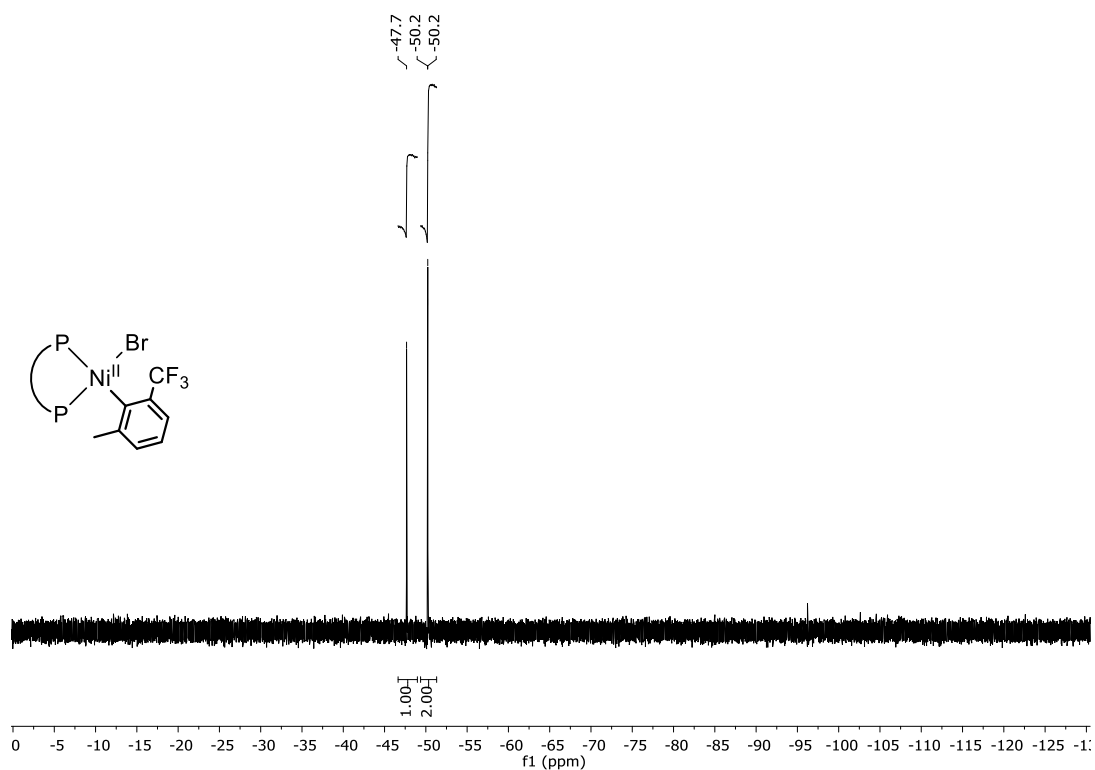

Figure S46.  $^{19}\text{F}$  NMR spectrum ( $d_8$ -toluene, 376 MHz,  $-50\text{ }^\circ\text{C}$ ) of  $(\text{dppf})\text{Ni}^{\text{II}}(2\text{-trifluoromethyl-6-methylphenyl})(\text{Br})$ , **12**.

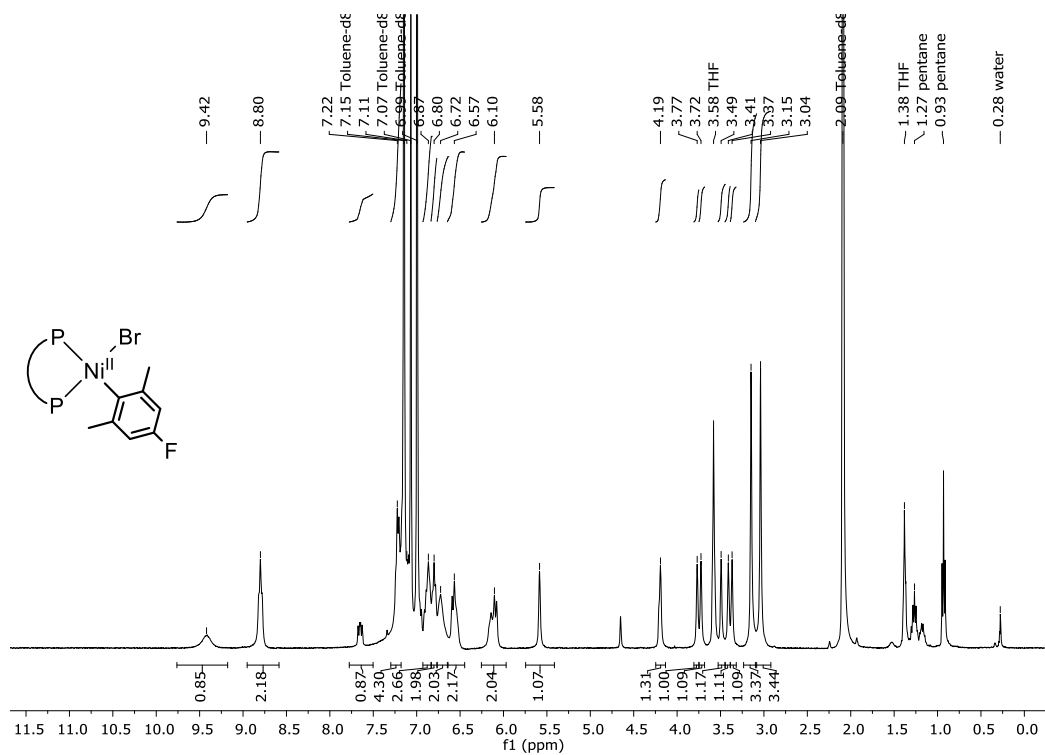

Figure S47.  $^1\text{H}$  NMR spectrum ( $d_8$ -toluene, 400 MHz,  $-50\text{ }^\circ\text{C}$ ) of  $(\text{dppf})\text{Ni}^{\text{II}}(2,6\text{-dimethyl-4-fluorophenyl})(\text{Br})$ , **13**.

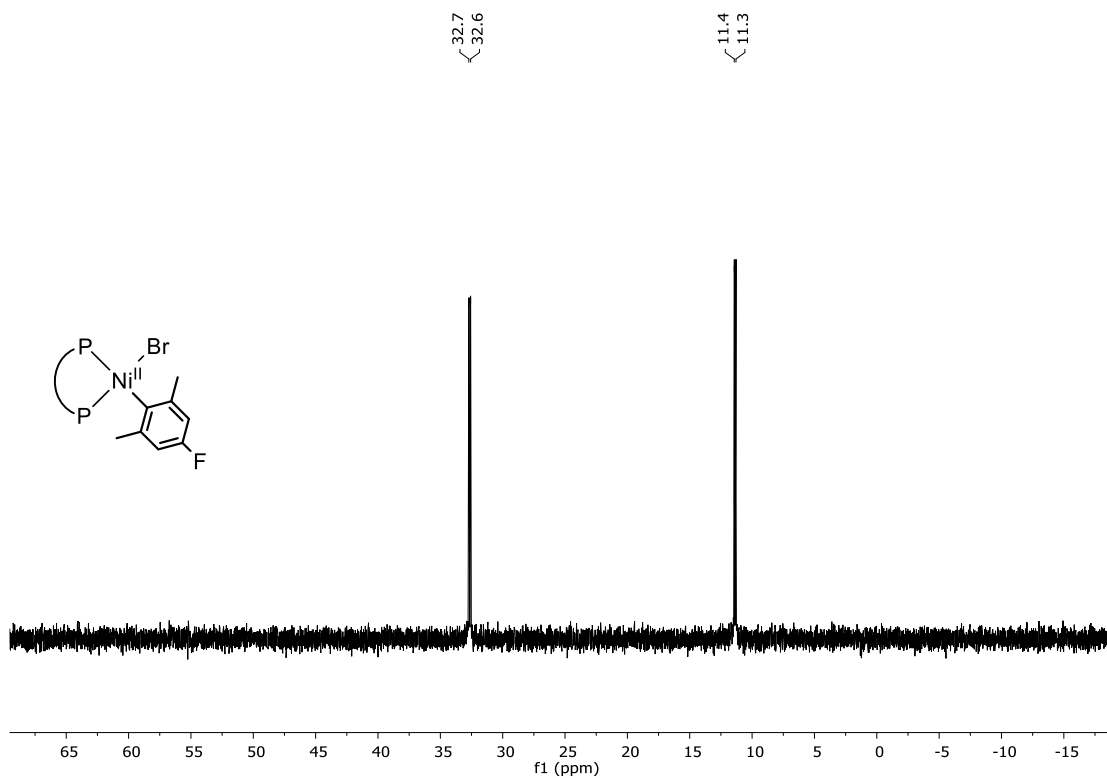

**Figure S48.**  $^{31}\text{P}$  NMR spectrum ( $\text{C}_6\text{D}_6$ , 202 MHz, 25 °C) of  $(\text{dppf})\text{Ni}^{\text{II}}(2,6\text{-dimethyl-4-fluorophenyl})(\text{Br})$ , **13**.

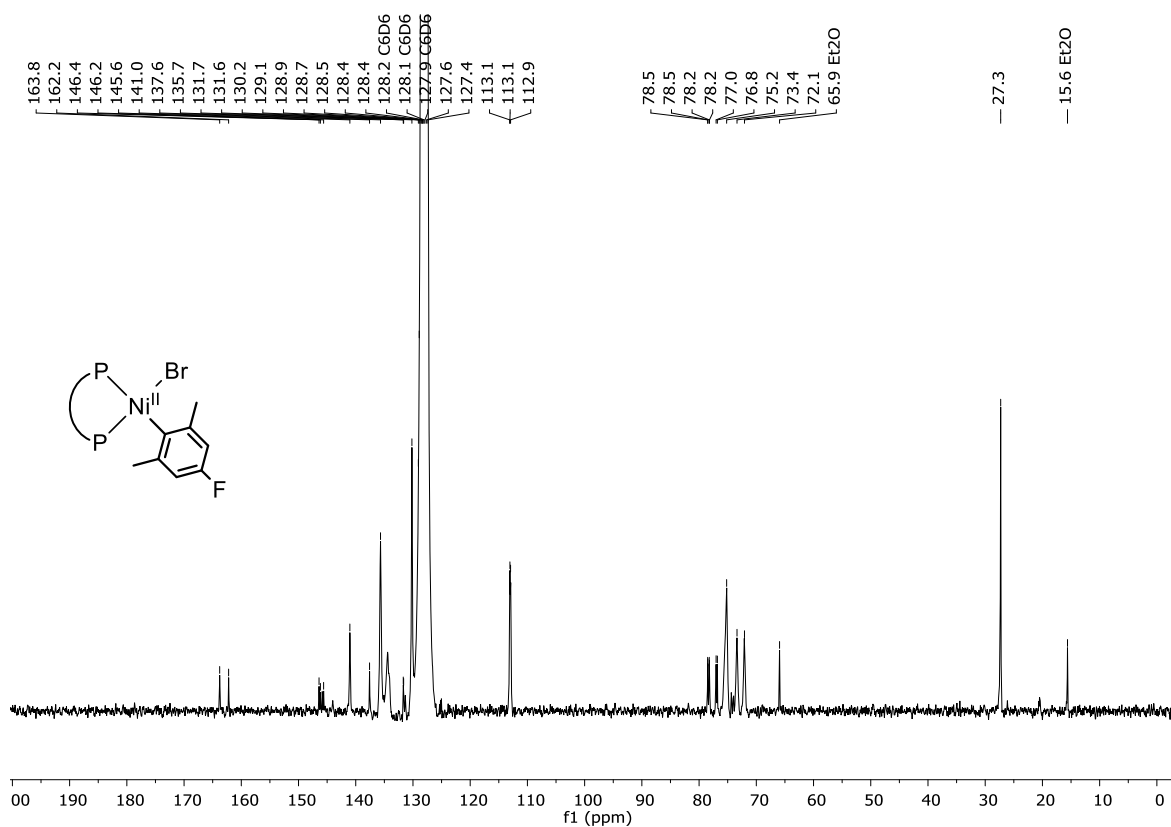

**Figure S49.**  $^{13}\text{C}$  NMR spectrum ( $\text{C}_6\text{D}_6$ , 151 MHz, 25 °C) of  $(\text{dppf})\text{Ni}^{\text{II}}(2,6\text{-dimethyl-4-fluorophenyl})(\text{Br})$ , **13**.

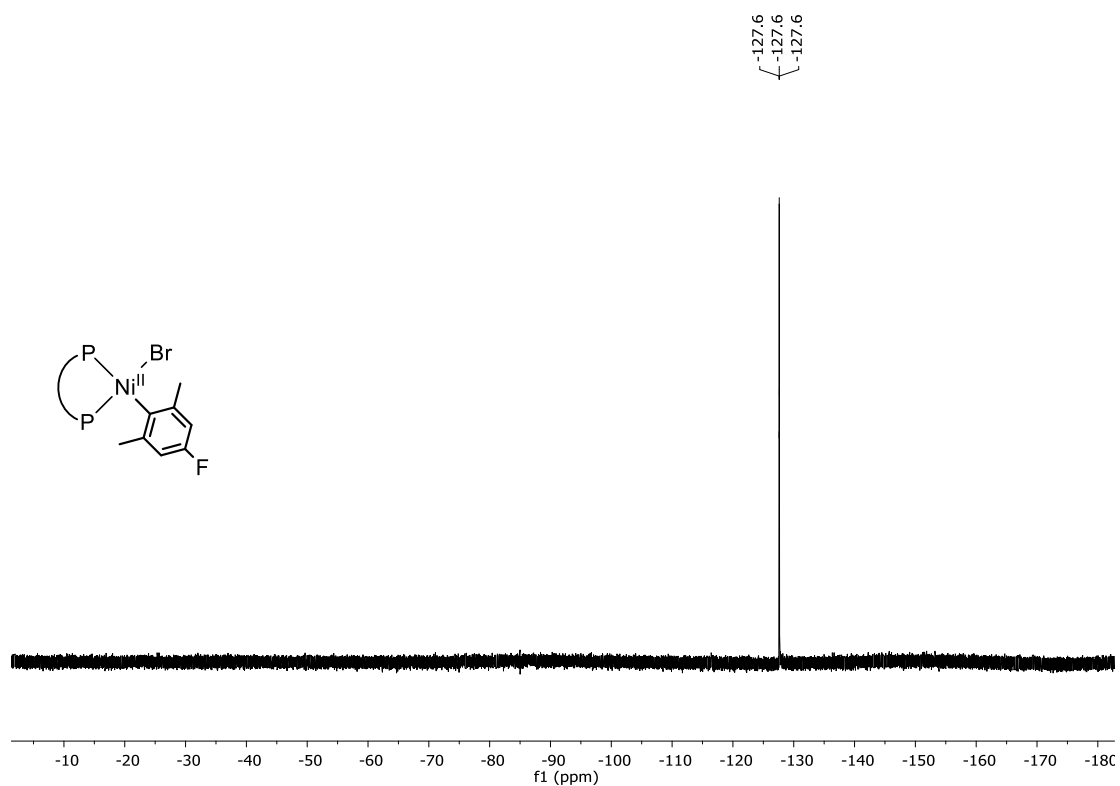

**Figure S50.**  $^{19}\text{F}$  NMR spectrum ( $\text{C}_6\text{D}_6$ , 470 MHz, 25 °C) of  $(\text{dppf})\text{Ni}^{\text{II}}(2,6\text{-dimethyl-4-fluorophenyl})(\text{Br})$ , **13**.

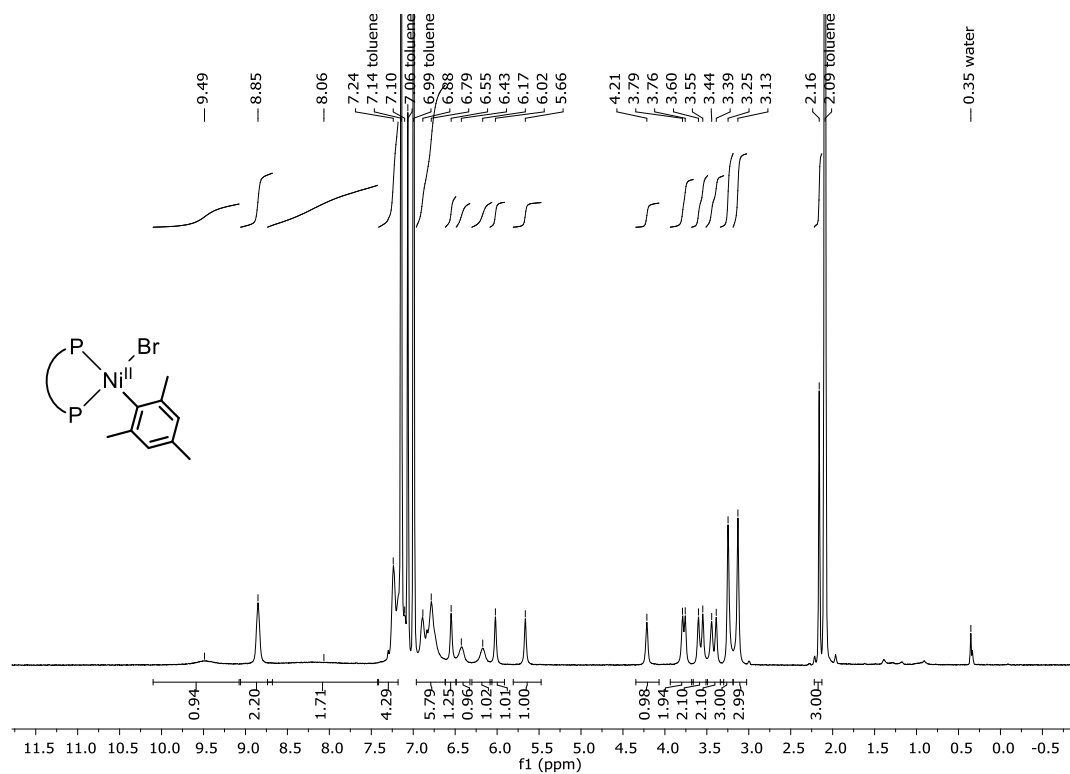

**Figure S51.**  $^1\text{H}$  NMR spectrum ( $d_8\text{-toluene}$ , 500 MHz, -50 °C) of  $(\text{dppf})\text{Ni}^{\text{II}}(\text{mesityl})(\text{Br})$ , **14**.

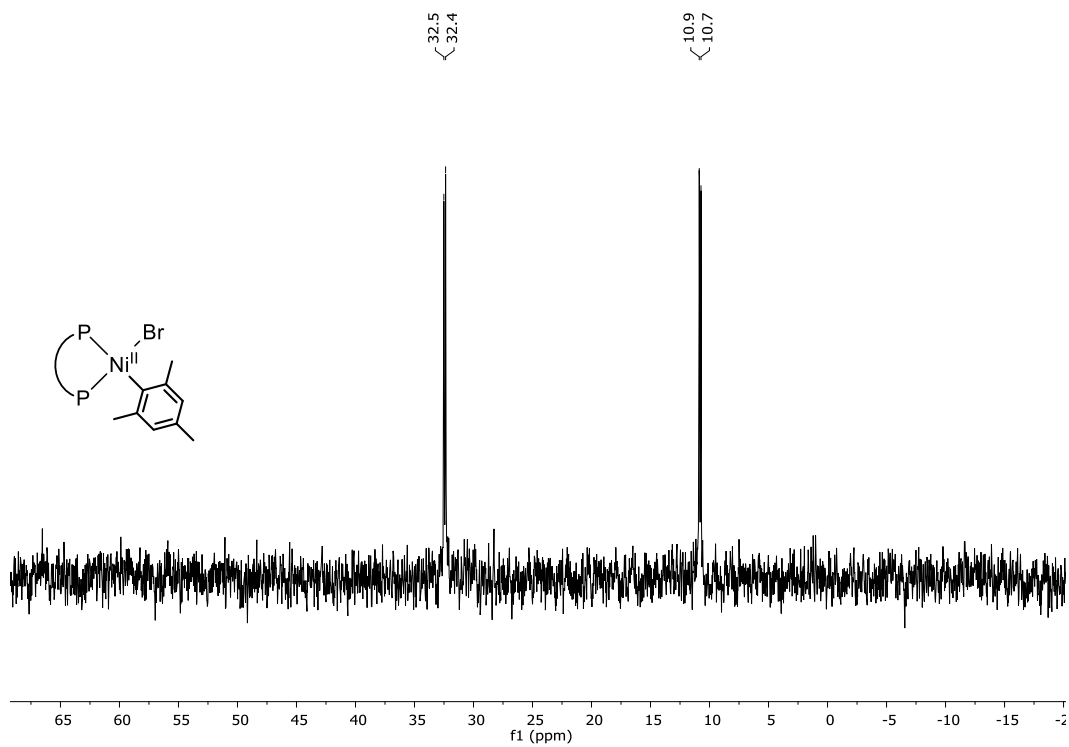

**Figure S52.**  $^{31}\text{P}$  NMR spectrum ( $\text{C}_6\text{D}_6$ , 161 MHz, 25 °C) of  $(\text{dppf})\text{Ni}^{\text{II}}(\text{mesityl})(\text{Br})$ , **14**.

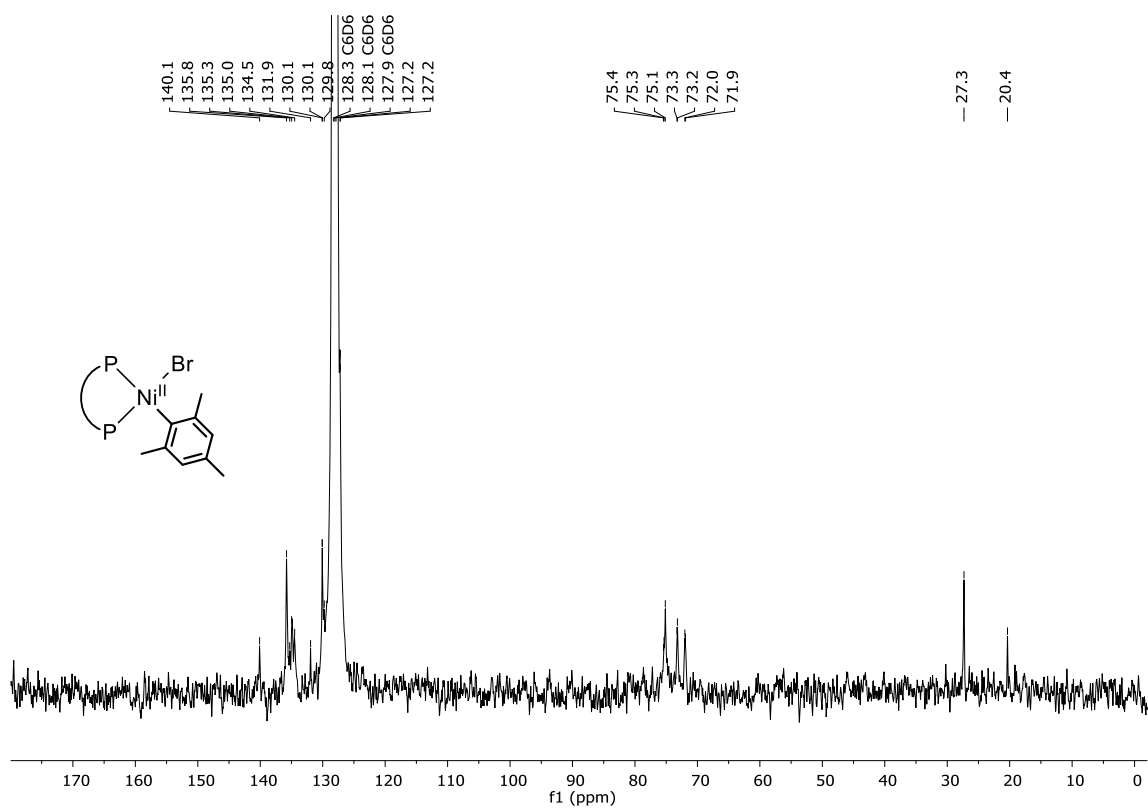

**Figure S53.**  $^{13}\text{C}$  NMR spectrum ( $\text{C}_6\text{D}_6$ , 126 MHz, 25 °C) of  $(\text{dppf})\text{Ni}^{\text{II}}(\text{mesityl})(\text{Br})$ , **14**.

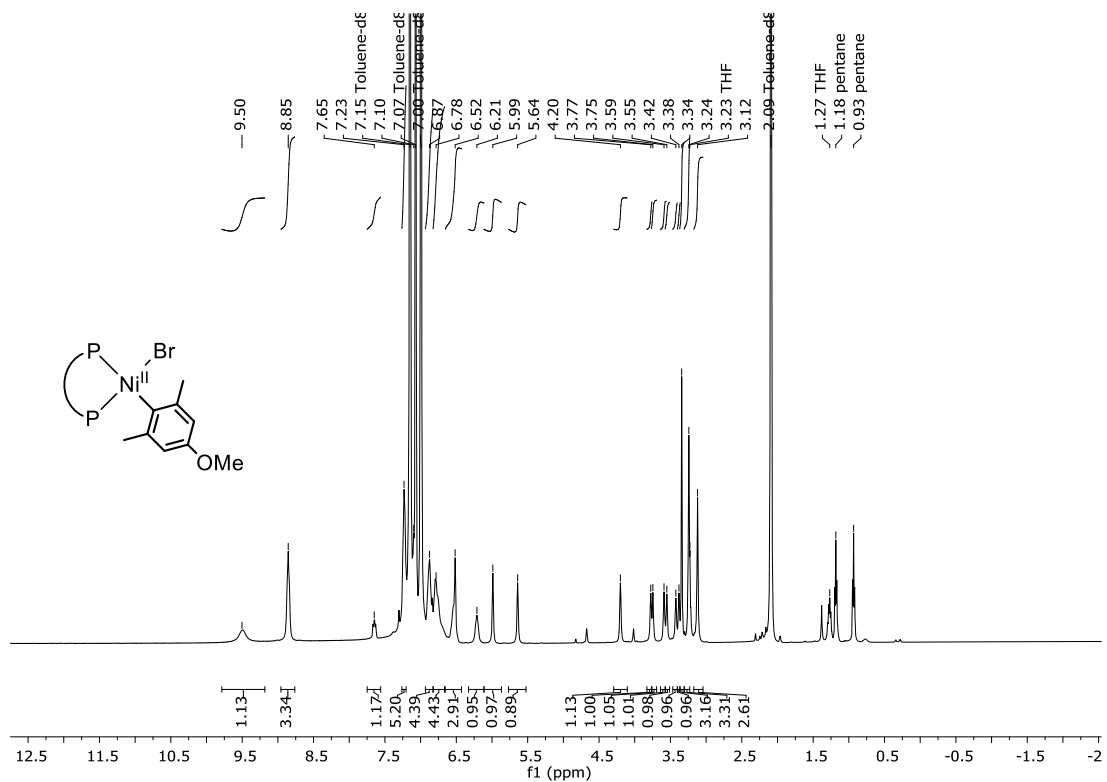

**Figure S54.**  $^1\text{H}$  NMR spectrum ( $d_8$ -toluene, 500 MHz,  $-50\text{ }^\circ\text{C}$ ) of  $(\text{dppf})\text{Ni}^{\text{II}}(2,6\text{-dimethyl-4-methoxyphenyl})(\text{Br})$ , **15**.

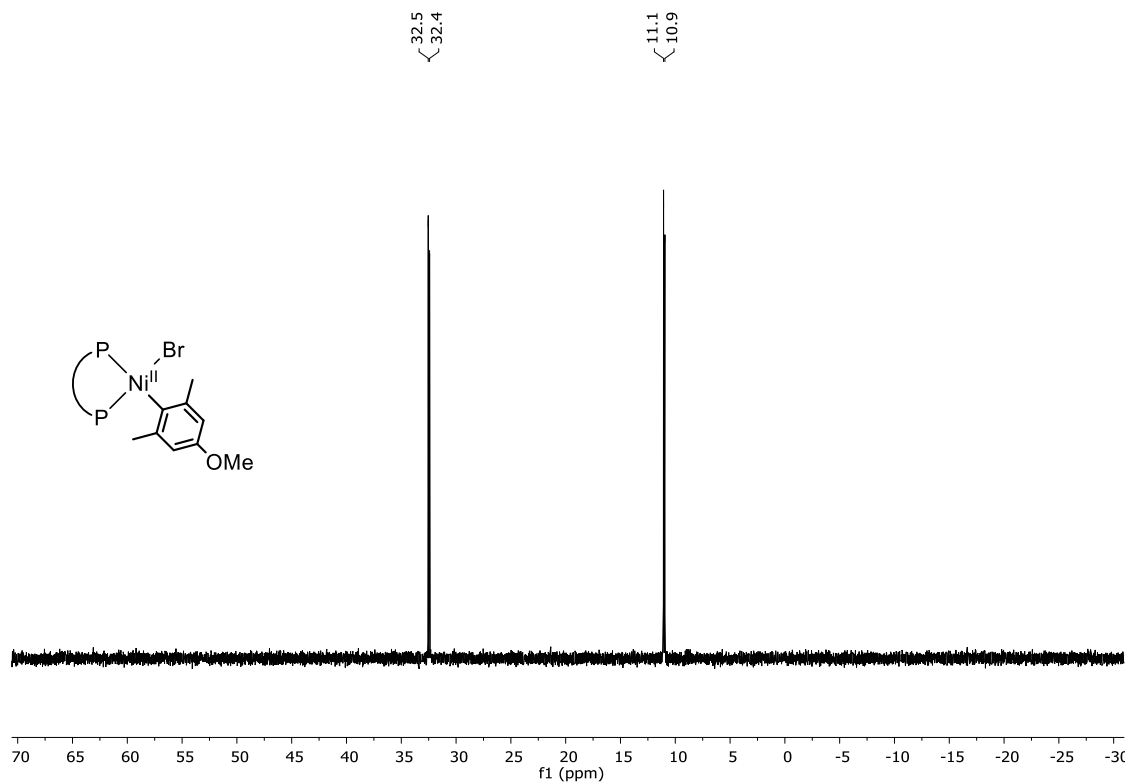

**Figure S55.**  $^{31}\text{P}$  NMR spectrum ( $\text{C}_6\text{D}_6$ , 202 MHz,  $25\text{ }^\circ\text{C}$ ) of  $(\text{dppf})\text{Ni}^{\text{II}}(2,6\text{-dimethyl-4-methoxyphenyl})(\text{Br})$ , **15**.

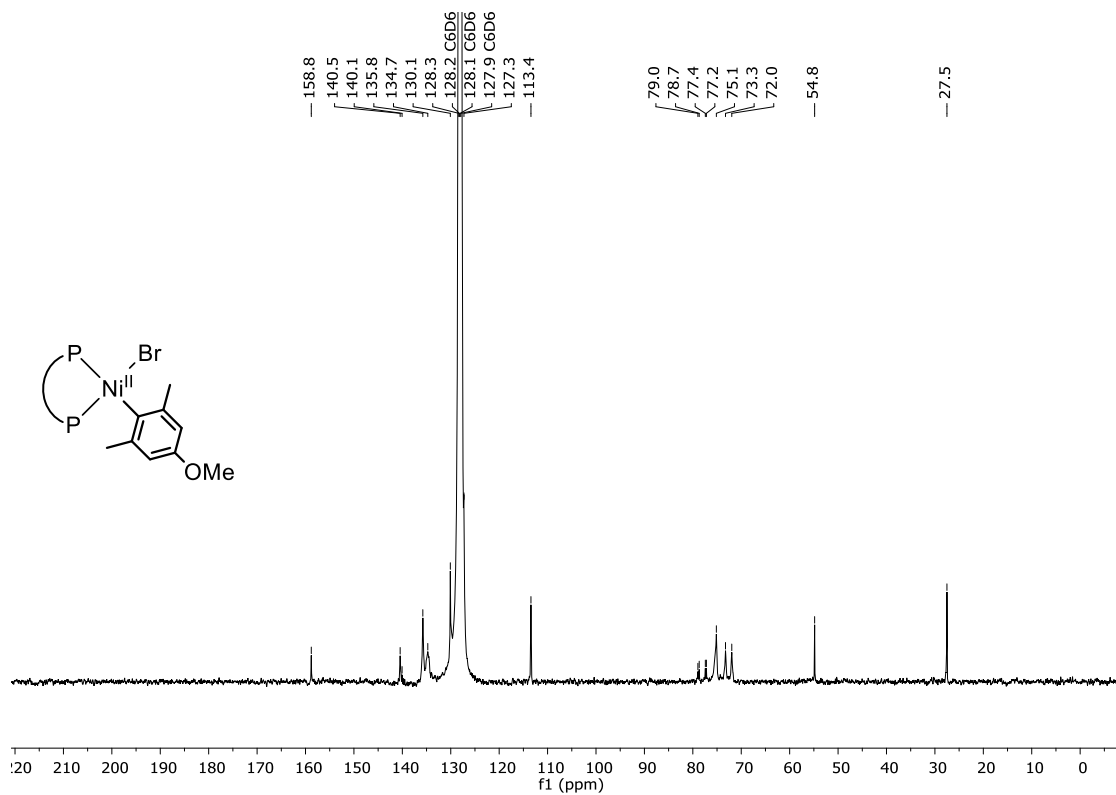

**Figure S56.**  $^{13}\text{C}$  NMR spectrum ( $\text{C}_6\text{D}_6$ , 151 MHz, 25 °C) of  $(\text{dppf})\text{Ni}^{\text{II}}(2,6\text{-dimethyl-4-methoxyphenyl})(\text{Br})$ , **15**.

## SVII. X-ray Diffraction Data

Further characterization of precatalysts was conducted through X-ray Crystallography. A comparison of relevant bond metrics for all catalysts crystallized is given in Table S4. Specific details regarding data collection and processing for each species is given below.

**Table S4.** Select bond lengths and angles of the crystallized precatalysts.

| Species              | Ni-C <sub>aryl</sub> (Å) | Ni-P <sub>trans</sub> (Å) | P-Ni-P (°)             |
|----------------------|--------------------------|---------------------------|------------------------|
| <b>2</b>             | 1.924(6)                 | 2.2871(14)                | 99.76(5)               |
| <b>3<sup>a</sup></b> | 1.898(14), 1.905(14)     | 2.278(4), 2.281(4)        | 101.63(16), 102.43(16) |
| <b>4</b>             | 1.897(6)                 | 2.2564(17)                | 101.39(6)              |
| <b>5<sup>a</sup></b> | 1.896(18), 1.898(17)     | 2.274(6), 2.263(5)        | 100.08(19), 100.09(19) |
| <b>6</b>             | 1.890(7)                 | 2.278(2)                  | 102.54(8)              |
| <b>7<sup>b</sup></b> | 1.87(3)                  | 2.276(10)                 | 102.0(3)               |
| <b>8</b>             | 1.891(9)                 | 2.280(3)                  | 101.77(10)             |
| <b>10</b>            | 1.888(4)                 | 2.2616(13)                | 100.16(5)              |
| <b>12</b>            | 1.932(4)                 | 2.3172(11)                | 97.04(4)               |
| <b>13</b>            | 1.914(2)                 | 2.2957(7)                 | 98.96(2)               |
| <b>14</b>            | 1.906(6)                 | 2.2460(17)                | 100.11(6)              |

<sup>a</sup><sup>b</sup>Two sets of geometric parameters are included because there are two independent molecules in the unit cell. <sup>b</sup>Only low angle diffraction data used.

### X-ray Diffraction Data for *(dppf)Ni(1-naphthyl)(Br)* (**2**)

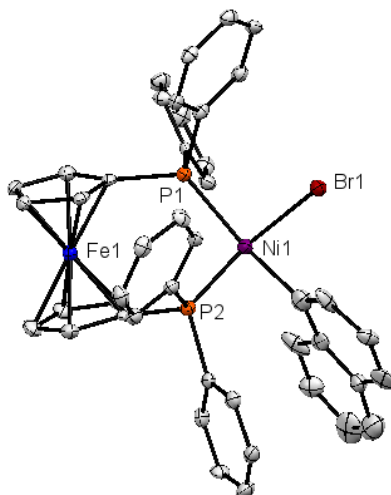

**Figure S57.** ORTEP of **2**, with ellipsoids shown at 50% probability. Hydrogen atoms and solvent of crystallization have been removed for clarity.

Crystals suitable for X-ray diffraction were grown from a concentrated solution of **2** in THF layered with pentane at -15 °C. Low-temperature diffraction data ( $\omega$ -scans) were collected on a



Rigaku SCX Mini diffractometer coupled to a Rigaku Mercury275R CCD with Mo K $\alpha$  radiation ( $\lambda = 0.71073 \text{ \AA}$ ) for the structure of **2** (Figure S57). The diffraction images were processed and scaled using Rigaku Oxford Diffraction software.<sup>10</sup> The structure was solved with SHELXT and was refined against F<sup>2</sup> on all data by full-matrix least squares with SHELXL<sup>11</sup>. All non-hydrogen atoms were refined anisotropically. Hydrogen atoms were included in the model at geometrically calculated positions and refined using a riding model. The isotropic displacement parameters of all hydrogen atoms were fixed to 1.2 times the U value of the atoms to which they are linked (1.5 times for methyl groups). Eight reflections were omitted in which the Error/esd value was abnormally high. These reflections were located close to the beamstop. The full numbering scheme of compound **2** can be found in the full details of the X-ray structure determination (CIF), which is included as Supporting Information. CCDC number 1860562 contains the supplementary crystallographic data for this paper. These data can be obtained free of charge from The Cambridge Crystallographic Data Center via [www.ccdc.cam.ac.uk/data\\_request/cif](http://www.ccdc.cam.ac.uk/data_request/cif).

**Table S5.** Crystal data and structure refinement for **2**.

|                                                |                                                                        |
|------------------------------------------------|------------------------------------------------------------------------|
| Empirical formula                              | C <sub>48</sub> H <sub>43</sub> BrFeNiOP <sub>2</sub>                  |
| Formula weight                                 | 892.23                                                                 |
| Temperature/K                                  | 93.15                                                                  |
| Crystal system                                 | monoclinic                                                             |
| Space group                                    | P2 <sub>1</sub> /c                                                     |
| a/ $\text{\AA}$                                | 12.6607(7)                                                             |
| b/ $\text{\AA}$                                | 15.1096(8)                                                             |
| c/ $\text{\AA}$                                | 20.4830(12)                                                            |
| $\alpha$ / $^\circ$                            | 90                                                                     |
| $\beta$ / $^\circ$                             | 104.423(6)                                                             |
| $\gamma$ / $^\circ$                            | 90                                                                     |
| Volume/ $\text{\AA}^3$                         | 3794.9(4)                                                              |
| Z                                              | 4                                                                      |
| $\rho_{\text{calc}}/\text{g/cm}^3$             | 1.562                                                                  |
| $\mu/\text{mm}^{-1}$                           | 2.054                                                                  |
| F(000)                                         | 1832.0                                                                 |
| Crystal size/ $\text{mm}^3$                    | 0.1 $\times$ 0.1 $\times$ 0.05                                         |
| Radiation                                      | MoK $\alpha$ ( $\lambda = 0.71073$ )                                   |
| 2 $\Theta$ range for data collection/ $^\circ$ | 5.326 to 50.05                                                         |
| Index ranges                                   | -15 $\leq$ h $\leq$ 15, -17 $\leq$ k $\leq$ 17, -24 $\leq$ l $\leq$ 24 |
| Reflections collected                          | 53514                                                                  |
| Independent reflections                        | 6688 [ $R_{\text{int}} = 0.1437$ , $R_{\text{sigma}} = 0.0834$ ]       |
| Data/restraints/parameters                     | 6688/0/487                                                             |

|                                         |                                  |
|-----------------------------------------|----------------------------------|
| Goodness-of-fit on $F^2$                | 1.035                            |
| Final R indexes [ $I \geq 2\sigma(I)$ ] | $R_1 = 0.0503$ , $wR_2 = 0.0990$ |
| Final R indexes [all data]              | $R_1 = 0.0884$ , $wR_2 = 0.1139$ |

**Table S6.** Fractional Atomic Coordinates ( $\times 10^4$ ) and Equivalent Isotropic Displacement Parameters ( $\text{\AA}^2 \times 10^3$ ) for **2**.  $U_{\text{eq}}$  is defined as 1/3 of the trace of the orthogonalised  $U_{\text{ij}}$  tensor.

| Atom | x          | y         | z         | $U(\text{eq})$ |
|------|------------|-----------|-----------|----------------|
| Br1  | 4123.7(4)  | 2867.5(3) | 8049.4(2) | 19.59(14)      |
| Ni1  | 2993.6(5)  | 3369.5(4) | 7052.1(3) | 18.27(17)      |
| Fe1  | 2962.8(6)  | 3470.2(5) | 5000.1(3) | 16.35(18)      |
| P1   | 4442.6(10) | 3327.7(9) | 6572.7(6) | 14.3(3)        |
| P2   | 1790.6(11) | 3947.4(9) | 6240.7(6) | 16.0(3)        |
| C1   | 1908(5)    | 3531(4)   | 7552(3)   | 33.1(15)       |
| C2   | 1129(4)    | 2919(4)   | 7582(3)   | 31.1(15)       |
| C3   | 1149(5)    | 2059(4)   | 7206(3)   | 36.0(16)       |
| C4   | 343(5)     | 1497(4)   | 7201(3)   | 28.6(14)       |
| C5   | -493(6)    | 1672(5)   | 7519(3)   | 49.5(19)       |
| C6   | -536(5)    | 2407(5)   | 7859(3)   | 47.2(18)       |
| C7   | 295(4)     | 3010(4)   | 7900(3)   | 23.7(13)       |
| C8   | 304(5)     | 3845(4)   | 8288(3)   | 43.2(18)       |
| C9   | 1092(4)    | 4441(4)   | 8291(3)   | 24.3(13)       |
| C10  | 1844(5)    | 4272(4)   | 7911(3)   | 30.7(15)       |
| C11  | 4992(4)    | 2218(3)   | 6571(2)   | 15.1(11)       |
| C12  | 6014(4)    | 2084(3)   | 6454(2)   | 19.3(12)       |
| C13  | 6379(4)    | 1237(3)   | 6403(3)   | 24.0(13)       |
| C14  | 5745(4)    | 528(4)    | 6463(3)   | 24.9(13)       |
| C15  | 4746(4)    | 651(4)    | 6595(2)   | 22.9(13)       |
| C16  | 4379(4)    | 1500(3)   | 6649(2)   | 18.2(12)       |
| C17  | 5613(4)    | 3961(3)   | 7033(2)   | 16.6(11)       |
| C18  | 6353(4)    | 3594(3)   | 7575(2)   | 18.9(12)       |
| C19  | 7220(4)    | 4081(3)   | 7934(2)   | 18.8(12)       |
| C20  | 7367(4)    | 4932(3)   | 7756(2)   | 19.6(12)       |
| C21  | 6647(4)    | 5308(3)   | 7218(2)   | 17.6(11)       |
| C22  | 5770(4)    | 4836(3)   | 6864(2)   | 17.4(11)       |
| C23  | 2137(4)    | 5107(3)   | 6224(2)   | 16.5(11)       |
| C24  | 3044(4)    | 5404(3)   | 6687(2)   | 16.6(11)       |
| C25  | 3407(4)    | 6264(3)   | 6672(2)   | 20.4(12)       |
| C26  | 2840(4)    | 6828(3)   | 6185(2)   | 21.4(12)       |
| C27  | 1906(4)    | 6554(3)   | 5738(3)   | 22.6(12)       |
| C28  | 1555(4)    | 5697(3)   | 5752(3)   | 19.7(12)       |
| C29  | 368(4)     | 3958(3)   | 6245(2)   | 17.2(11)       |
| C30  | -299(4)    | 3253(3)   | 5983(2)   | 19.6(12)       |

|     |          |          |         |          |
|-----|----------|----------|---------|----------|
| C31 | -1366(4) | 3231(3)  | 6016(2) | 20.3(12) |
| C32 | -1776(4) | 3915(4)  | 6320(3) | 23.6(13) |
| C33 | -1132(4) | 4625(3)  | 6573(2) | 19.1(12) |
| C34 | -64(4)   | 4642(3)  | 6535(2) | 19.8(12) |
| C35 | 4358(4)  | 3646(3)  | 5710(2) | 14.0(11) |
| C36 | 3963(4)  | 4463(3)  | 5401(2) | 17.0(11) |
| C37 | 3906(4)  | 4401(3)  | 4706(2) | 17.2(11) |
| C38 | 4261(4)  | 3553(4)  | 4577(2) | 20.3(12) |
| C39 | 4541(4)  | 3088(4)  | 5190(2) | 20.1(12) |
| C40 | 1714(4)  | 3485(3)  | 5430(2) | 15.1(11) |
| C41 | 1411(4)  | 3883(4)  | 4782(2) | 20.9(12) |
| C42 | 1530(4)  | 3259(4)  | 4298(3) | 24.1(13) |
| C43 | 1910(4)  | 2466(4)  | 4634(3) | 21.1(12) |
| C44 | 2025(4)  | 2593(4)  | 5325(3) | 19.8(12) |
| O1  | 2274(6)  | 8570(3)  | 5084(3) | 87(2)    |
| C45 | 1312(7)  | 9080(5)  | 4983(4) | 65(2)    |
| C46 | 1692(7)  | 10009(5) | 5168(4) | 65(2)    |
| C47 | 2824(7)  | 10016(5) | 5048(3) | 59(2)    |
| C48 | 3212(7)  | 9093(4)  | 5251(3) | 56(2)    |

**Table S7.** Anisotropic Displacement Parameters ( $\text{\AA}^2 \times 10^3$ ) for **2**. The Anisotropic displacement factor exponent takes the form:  $-2\pi^2[h^2a^{*2}U_{11}+2hka^*b^*U_{12}+\dots]$ .

| Atom | U <sub>11</sub> | U <sub>22</sub> | U <sub>33</sub> | U <sub>23</sub> | U <sub>13</sub> | U <sub>12</sub> |
|------|-----------------|-----------------|-----------------|-----------------|-----------------|-----------------|
| Br1  | 17.6(3)         | 24.3(3)         | 16.7(3)         | 4.7(2)          | 4.0(2)          | 2.3(2)          |
| Ni1  | 13.0(4)         | 24.8(4)         | 17.2(3)         | 7.5(3)          | 4.1(3)          | 0.9(3)          |
| Fe1  | 16.1(4)         | 19.4(4)         | 13.8(4)         | -0.8(3)         | 4.2(3)          | -1.4(3)         |
| P1   | 13.6(7)         | 15.9(7)         | 13.5(6)         | 1.0(6)          | 3.7(5)          | -0.7(6)         |
| P2   | 13.6(7)         | 18.3(7)         | 15.8(7)         | 2.5(6)          | 2.9(6)          | -1.6(6)         |
| C1   | 29(4)           | 40(4)           | 29(3)           | 13(3)           | 5(3)            | 8(3)            |
| C2   | 19(3)           | 48(4)           | 26(3)           | 27(3)           | 4(3)            | 8(3)            |
| C3   | 35(4)           | 20(3)           | 39(4)           | 9(3)            | -15(3)          | 2(3)            |
| C4   | 28(3)           | 21(3)           | 36(3)           | 3(3)            | 6(3)            | 4(3)            |
| C5   | 60(5)           | 43(4)           | 44(4)           | 21(4)           | 11(4)           | 30(4)           |
| C6   | 40(4)           | 55(5)           | 49(4)           | 26(4)           | 16(3)           | 13(4)           |
| C7   | 19(3)           | 33(3)           | 19(3)           | 7(3)            | 3(2)            | 0(3)            |
| C8   | 26(4)           | 56(5)           | 39(4)           | 15(3)           | -7(3)           | 19(3)           |
| C9   | 16(3)           | 25(3)           | 28(3)           | 0(3)            | -1(3)           | 5(3)            |
| C10  | 34(4)           | 34(3)           | 17(3)           | -13(3)          | -6(3)           | 16(3)           |
| C11  | 16(3)           | 19(3)           | 9(2)            | 3(2)            | 0(2)            | -2(2)           |
| C12  | 14(3)           | 21(3)           | 23(3)           | 1(2)            | 3(2)            | -2(2)           |
| C13  | 21(3)           | 26(3)           | 28(3)           | -1(3)           | 10(3)           | 5(3)            |
| C14  | 31(3)           | 20(3)           | 26(3)           | -6(3)           | 11(3)           | 2(3)            |

|     |        |       |       |        |        |        |
|-----|--------|-------|-------|--------|--------|--------|
| C15 | 26(3)  | 23(3) | 19(3) | -7(2)  | 6(2)   | -10(2) |
| C16 | 14(3)  | 22(3) | 17(3) | 0(2)   | 0(2)   | 2(2)   |
| C17 | 17(3)  | 17(3) | 17(3) | -2(2)  | 8(2)   | -1(2)  |
| C18 | 18(3)  | 20(3) | 21(3) | 6(2)   | 8(2)   | 2(2)   |
| C19 | 11(3)  | 26(3) | 18(3) | -1(2)  | 1(2)   | 4(2)   |
| C20 | 16(3)  | 23(3) | 20(3) | -6(2)  | 5(2)   | 0(2)   |
| C21 | 20(3)  | 14(3) | 21(3) | -2(2)  | 10(2)  | -3(2)  |
| C22 | 16(3)  | 23(3) | 14(3) | -1(2)  | 6(2)   | 0(2)   |
| C23 | 13(3)  | 21(3) | 17(3) | -1(2)  | 6(2)   | 0(2)   |
| C24 | 15(3)  | 22(3) | 14(3) | 3(2)   | 5(2)   | 3(2)   |
| C25 | 21(3)  | 21(3) | 17(3) | -6(2)  | 1(2)   | -1(2)  |
| C26 | 27(3)  | 17(3) | 22(3) | -3(2)  | 10(3)  | 1(2)   |
| C27 | 28(3)  | 21(3) | 17(3) | 4(2)   | 3(2)   | 3(3)   |
| C28 | 16(3)  | 25(3) | 20(3) | -2(2)  | 6(2)   | 0(2)   |
| C29 | 14(3)  | 21(3) | 16(3) | 7(2)   | 4(2)   | 1(2)   |
| C30 | 25(3)  | 21(3) | 14(3) | -1(2)  | 5(2)   | 0(2)   |
| C31 | 14(3)  | 25(3) | 21(3) | 0(2)   | 1(2)   | -8(2)  |
| C32 | 17(3)  | 30(3) | 26(3) | 4(3)   | 10(2)  | 1(3)   |
| C33 | 19(3)  | 21(3) | 19(3) | 6(2)   | 8(2)   | 6(2)   |
| C34 | 20(3)  | 22(3) | 18(3) | 7(2)   | 5(2)   | 2(2)   |
| C35 | 9(3)   | 18(3) | 14(3) | -1(2)  | 3(2)   | -4(2)  |
| C36 | 10(3)  | 21(3) | 21(3) | 1(2)   | 5(2)   | -3(2)  |
| C37 | 14(3)  | 22(3) | 15(3) | 5(2)   | 4(2)   | -3(2)  |
| C38 | 14(3)  | 34(3) | 14(3) | -5(2)  | 7(2)   | -6(2)  |
| C39 | 14(3)  | 27(3) | 19(3) | -1(2)  | 4(2)   | -3(2)  |
| C40 | 8(3)   | 19(3) | 17(3) | 1(2)   | 0(2)   | -4(2)  |
| C41 | 13(3)  | 28(3) | 21(3) | 3(2)   | 3(2)   | 0(2)   |
| C42 | 21(3)  | 30(3) | 18(3) | -2(3)  | -1(2)  | -6(3)  |
| C43 | 20(3)  | 22(3) | 20(3) | -5(2)  | 2(2)   | -6(2)  |
| C44 | 12(3)  | 25(3) | 21(3) | -2(2)  | 2(2)   | -7(2)  |
| O1  | 103(5) | 38(3) | 99(5) | -5(3)  | -12(4) | 2(3)   |
| C45 | 92(7)  | 48(5) | 58(5) | 12(4)  | 24(5)  | -7(5)  |
| C46 | 112(8) | 44(5) | 40(4) | 5(4)   | 21(5)  | 17(5)  |
| C47 | 93(7)  | 43(4) | 30(4) | 3(3)   | -6(4)  | -7(4)  |
| C48 | 95(6)  | 42(4) | 26(4) | -11(3) | 4(4)   | -12(4) |

**Table S8.** Bond Lengths for **2**.

| Atom | Atom | Length/Å   | Atom | Atom | Length/Å |
|------|------|------------|------|------|----------|
| Br1  | Ni1  | 2.3106(8)  | C14  | C15  | 1.370(7) |
| Ni1  | P1   | 2.2871(14) | C15  | C16  | 1.379(7) |
| Ni1  | P2   | 2.1409(14) | C17  | C18  | 1.380(7) |
| Ni1  | C1   | 1.924(6)   | C17  | C22  | 1.394(7) |

|     |     |          |     |     |           |
|-----|-----|----------|-----|-----|-----------|
| Fe1 | C35 | 2.006(5) | C18 | C19 | 1.372(7)  |
| Fe1 | C36 | 2.003(5) | C19 | C20 | 1.362(7)  |
| Fe1 | C37 | 2.031(5) | C20 | C21 | 1.367(7)  |
| Fe1 | C38 | 2.044(5) | C21 | C22 | 1.365(7)  |
| Fe1 | C39 | 2.022(5) | C23 | C24 | 1.370(7)  |
| Fe1 | C40 | 1.992(5) | C23 | C28 | 1.384(7)  |
| Fe1 | C41 | 2.003(5) | C24 | C25 | 1.381(7)  |
| Fe1 | C42 | 2.040(5) | C25 | C26 | 1.371(7)  |
| Fe1 | C43 | 2.035(5) | C26 | C27 | 1.367(7)  |
| Fe1 | C44 | 2.001(5) | C27 | C28 | 1.372(7)  |
| P1  | C11 | 1.816(5) | C29 | C30 | 1.382(7)  |
| P1  | C17 | 1.818(5) | C29 | C34 | 1.373(7)  |
| P1  | C35 | 1.808(5) | C30 | C31 | 1.369(7)  |
| P2  | C23 | 1.809(5) | C31 | C32 | 1.374(7)  |
| P2  | C29 | 1.804(5) | C32 | C33 | 1.369(7)  |
| P2  | C40 | 1.782(5) | C33 | C34 | 1.373(7)  |
| C1  | C2  | 1.364(8) | C35 | C36 | 1.421(7)  |
| C1  | C10 | 1.352(8) | C35 | C39 | 1.422(7)  |
| C2  | C3  | 1.515(8) | C36 | C37 | 1.409(7)  |
| C2  | C7  | 1.378(7) | C37 | C38 | 1.405(7)  |
| C3  | C4  | 1.327(8) | C38 | C39 | 1.405(7)  |
| C4  | C5  | 1.401(8) | C40 | C41 | 1.420(7)  |
| C5  | C6  | 1.318(9) | C40 | C44 | 1.434(7)  |
| C6  | C7  | 1.378(8) | C41 | C42 | 1.404(7)  |
| C7  | C8  | 1.490(8) | C42 | C43 | 1.406(7)  |
| C8  | C9  | 1.343(8) | C43 | C44 | 1.400(7)  |
| C9  | C10 | 1.394(8) | O1  | C45 | 1.412(9)  |
| C11 | C12 | 1.388(7) | O1  | C48 | 1.397(9)  |
| C11 | C16 | 1.366(7) | C45 | C46 | 1.501(10) |
| C12 | C13 | 1.373(7) | C46 | C47 | 1.513(11) |
| C13 | C14 | 1.363(7) | C47 | C48 | 1.503(9)  |

**Table S9.** Bond Angles for **2**.

| <b>Atom</b> | <b>Atom</b> | <b>Atom</b> | <b>Angle/°</b> | <b>Atom</b> | <b>Atom</b> | <b>Atom</b> | <b>Angle/°</b> |
|-------------|-------------|-------------|----------------|-------------|-------------|-------------|----------------|
| P1          | Ni1         | Br1         | 89.10(4)       | C9          | C8          | C7          | 118.6(6)       |
| P2          | Ni1         | Br1         | 169.84(5)      | C8          | C9          | C10         | 118.9(6)       |
| P2          | Ni1         | P1          | 99.76(5)       | C1          | C10         | C9          | 126.6(6)       |
| C1          | Ni1         | Br1         | 86.47(17)      | C12         | C11         | P1          | 120.6(4)       |
| C1          | Ni1         | P1          | 171.17(19)     | C16         | C11         | P1          | 120.3(4)       |
| C1          | Ni1         | P2          | 84.08(17)      | C16         | C11         | C12         | 119.1(5)       |
| C35         | Fe1         | C37         | 69.32(19)      | C13         | C12         | C11         | 119.6(5)       |
| C35         | Fe1         | C38         | 69.13(19)      | C14         | C13         | C12         | 120.6(5)       |

|     |     |     |            |     |     |     |          |
|-----|-----|-----|------------|-----|-----|-----|----------|
| C35 | Fe1 | C39 | 41.34(19)  | C13 | C14 | C15 | 120.3(5) |
| C35 | Fe1 | C42 | 178.1(2)   | C14 | C15 | C16 | 119.2(5) |
| C35 | Fe1 | C43 | 138.0(2)   | C11 | C16 | C15 | 121.1(5) |
| C36 | Fe1 | C35 | 41.54(19)  | C18 | C17 | P1  | 120.6(4) |
| C36 | Fe1 | C37 | 40.88(19)  | C18 | C17 | C22 | 118.1(5) |
| C36 | Fe1 | C38 | 68.6(2)    | C22 | C17 | P1  | 121.3(4) |
| C36 | Fe1 | C39 | 69.0(2)    | C19 | C18 | C17 | 120.5(5) |
| C36 | Fe1 | C42 | 140.0(2)   | C20 | C19 | C18 | 120.5(5) |
| C36 | Fe1 | C43 | 177.0(2)   | C19 | C20 | C21 | 120.0(5) |
| C37 | Fe1 | C38 | 40.3(2)    | C22 | C21 | C20 | 120.2(5) |
| C37 | Fe1 | C42 | 112.6(2)   | C21 | C22 | C17 | 120.7(5) |
| C37 | Fe1 | C43 | 141.9(2)   | C24 | C23 | P2  | 118.0(4) |
| C39 | Fe1 | C37 | 68.2(2)    | C24 | C23 | C28 | 118.8(5) |
| C39 | Fe1 | C38 | 40.42(19)  | C28 | C23 | P2  | 123.2(4) |
| C39 | Fe1 | C42 | 138.9(2)   | C23 | C24 | C25 | 121.2(5) |
| C39 | Fe1 | C43 | 112.5(2)   | C26 | C25 | C24 | 119.0(5) |
| C40 | Fe1 | C35 | 109.30(19) | C27 | C26 | C25 | 120.6(5) |
| C40 | Fe1 | C36 | 107.5(2)   | C26 | C27 | C28 | 120.1(5) |
| C40 | Fe1 | C37 | 135.5(2)   | C27 | C28 | C23 | 120.3(5) |
| C40 | Fe1 | C38 | 175.7(2)   | C30 | C29 | P2  | 120.4(4) |
| C40 | Fe1 | C39 | 140.6(2)   | C34 | C29 | P2  | 121.0(4) |
| C40 | Fe1 | C41 | 41.66(19)  | C34 | C29 | C30 | 118.6(5) |
| C40 | Fe1 | C42 | 69.5(2)    | C31 | C30 | C29 | 121.0(5) |
| C40 | Fe1 | C43 | 69.6(2)    | C30 | C31 | C32 | 119.5(5) |
| C40 | Fe1 | C44 | 42.1(2)    | C33 | C32 | C31 | 120.2(5) |
| C41 | Fe1 | C35 | 139.3(2)   | C32 | C33 | C34 | 119.8(5) |
| C41 | Fe1 | C36 | 110.1(2)   | C29 | C34 | C33 | 120.9(5) |
| C41 | Fe1 | C37 | 109.5(2)   | P1  | C35 | Fe1 | 120.0(2) |
| C41 | Fe1 | C38 | 137.2(2)   | C36 | C35 | Fe1 | 69.1(3)  |
| C41 | Fe1 | C39 | 177.6(2)   | C36 | C35 | P1  | 126.5(4) |
| C41 | Fe1 | C42 | 40.6(2)    | C36 | C35 | C39 | 106.6(4) |
| C41 | Fe1 | C43 | 68.5(2)    | C39 | C35 | Fe1 | 69.9(3)  |
| C42 | Fe1 | C38 | 112.2(2)   | C39 | C35 | P1  | 126.4(4) |
| C43 | Fe1 | C38 | 114.3(2)   | C35 | C36 | Fe1 | 69.3(3)  |
| C43 | Fe1 | C42 | 40.4(2)    | C37 | C36 | Fe1 | 70.6(3)  |
| C44 | Fe1 | C35 | 109.5(2)   | C37 | C36 | C35 | 108.4(4) |
| C44 | Fe1 | C36 | 136.6(2)   | C36 | C37 | Fe1 | 68.5(3)  |
| C44 | Fe1 | C37 | 177.2(2)   | C38 | C37 | Fe1 | 70.3(3)  |
| C44 | Fe1 | C38 | 142.0(2)   | C38 | C37 | C36 | 108.2(4) |
| C44 | Fe1 | C39 | 112.8(2)   | C37 | C38 | Fe1 | 69.3(3)  |
| C44 | Fe1 | C41 | 69.5(2)    | C39 | C38 | Fe1 | 69.0(3)  |
| C44 | Fe1 | C42 | 68.5(2)    | C39 | C38 | C37 | 108.0(4) |

|     |     |     |            |     |     |     |          |
|-----|-----|-----|------------|-----|-----|-----|----------|
| C44 | Fe1 | C43 | 40.58(19)  | C35 | C39 | Fe1 | 68.7(3)  |
| C11 | P1  | Ni1 | 112.01(16) | C38 | C39 | Fe1 | 70.6(3)  |
| C11 | P1  | C17 | 102.9(2)   | C38 | C39 | C35 | 108.7(5) |
| C17 | P1  | Ni1 | 113.61(16) | P2  | C40 | Fe1 | 123.5(3) |
| C35 | P1  | Ni1 | 123.60(16) | C41 | C40 | Fe1 | 69.6(3)  |
| C35 | P1  | C11 | 100.0(2)   | C41 | C40 | P2  | 130.1(4) |
| C35 | P1  | C17 | 102.1(2)   | C41 | C40 | C44 | 106.2(4) |
| C23 | P2  | Ni1 | 106.32(17) | C44 | C40 | Fe1 | 69.3(3)  |
| C29 | P2  | Ni1 | 121.23(16) | C44 | C40 | P2  | 123.7(4) |
| C29 | P2  | C23 | 103.8(2)   | C40 | C41 | Fe1 | 68.8(3)  |
| C40 | P2  | Ni1 | 115.25(17) | C42 | C41 | Fe1 | 71.1(3)  |
| C40 | P2  | C23 | 108.6(2)   | C42 | C41 | C40 | 108.9(5) |
| C40 | P2  | C29 | 100.7(2)   | C41 | C42 | Fe1 | 68.3(3)  |
| C2  | C1  | Ni1 | 123.9(5)   | C41 | C42 | C43 | 108.0(5) |
| C10 | C1  | Ni1 | 122.8(5)   | C43 | C42 | Fe1 | 69.6(3)  |
| C10 | C1  | C2  | 113.2(6)   | C42 | C43 | Fe1 | 70.0(3)  |
| C1  | C2  | C3  | 117.0(5)   | C44 | C43 | Fe1 | 68.4(3)  |
| C1  | C2  | C7  | 127.0(6)   | C44 | C43 | C42 | 108.4(5) |
| C7  | C2  | C3  | 115.9(5)   | C40 | C44 | Fe1 | 68.6(3)  |
| C4  | C3  | C2  | 116.3(6)   | C43 | C44 | Fe1 | 71.0(3)  |
| C3  | C4  | C5  | 123.0(6)   | C43 | C44 | C40 | 108.5(5) |
| C6  | C5  | C4  | 122.7(7)   | C48 | O1  | C45 | 112.2(6) |
| C5  | C6  | C7  | 117.2(7)   | O1  | C45 | C46 | 105.2(7) |
| C2  | C7  | C8  | 115.5(5)   | C45 | C46 | C47 | 102.9(6) |
| C6  | C7  | C2  | 124.7(6)   | C48 | C47 | C46 | 101.9(6) |
| C6  | C7  | C8  | 119.8(6)   | O1  | C48 | C47 | 104.9(6) |

*X-ray Diffraction Data for (dppf)Ni(2-ethylphenyl)(Br) (3)*

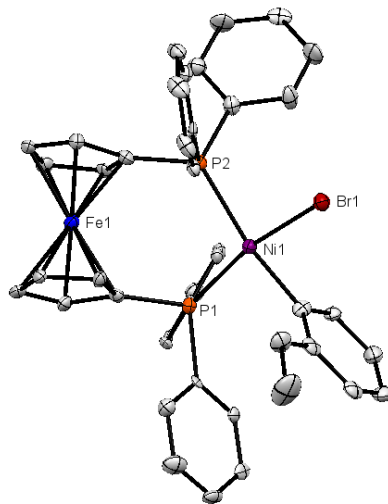

**Figure S58.** ORTEP of **3**, with ellipsoids shown at 50% probability. Hydrogen atoms and solvent of crystallization have been removed for clarity. Only one molecule present in the unit cell is shown.

Crystals suitable for X-ray diffraction were grown from a concentrated solution of **3** in THF layered with pentane at -15 °C. Low-temperature diffraction data ( $\omega$ -scans) were collected on a Rigaku SCX Mini diffractometer coupled to a Rigaku Mercury275R CCD with Mo  $K\alpha$  radiation ( $\lambda = 0.71073 \text{ \AA}$ ) for the structure of **3** (Figure S58). The diffraction images were processed and scaled using Rigaku Oxford Diffraction software.<sup>10</sup> Refined as a 2-component inversion twin. The contribution of the second twin component to the reflections was freely refined to 0.402(18). The structure was solved with SHELXT and was refined against  $F^2$  on all data by full-matrix least squares with SHELXL.<sup>11</sup> All non-hydrogen atoms were refined anisotropically. Hydrogen atoms were included in the model at geometrically calculated positions and refined using a riding model. The isotropic displacement parameters of all hydrogen atoms were fixed to 1.2 times the U value of the atoms to which they are linked (1.5 times for methyl groups). The data was poor and required a global rigid bond restraint to prevent the thermal ellipsoids from converging to non-positive definite matrices. The thermal parameter of C92 and C93 were constrained to be identical. These atoms represent disordered positions in the THF molecule. The full numbering scheme of compound **3** can be found in the full details of the X-ray structure determination (CIF), which is included as Supporting Information. CCDC number 1860567 contains the supplementary



crystallographic data for this paper. These data can be obtained free of charge from The Cambridge Crystallographic Data Center via [www.ccdc.cam.ac.uk/data\\_request/cif](http://www.ccdc.cam.ac.uk/data_request/cif).

**Table S10.** Crystal data and structure refinement for **3**.

|                                    |                                                               |
|------------------------------------|---------------------------------------------------------------|
| Empirical formula                  | C <sub>46</sub> H <sub>45</sub> BrFeNiOP <sub>2</sub>         |
| Formula weight                     | 870.23                                                        |
| Temperature/K                      | 93(2)                                                         |
| Crystal system                     | monoclinic                                                    |
| Space group                        | P2 <sub>1</sub>                                               |
| a/Å                                | 13.7174(11)                                                   |
| b/Å                                | 20.7385(10)                                                   |
| c/Å                                | 14.7169(11)                                                   |
| α/°                                | 90                                                            |
| β/°                                | 116.752(10)                                                   |
| γ/°                                | 90                                                            |
| Volume/Å <sup>3</sup>              | 3738.5(5)                                                     |
| Z                                  | 4                                                             |
| ρ <sub>calc</sub> /cm <sup>3</sup> | 1.546                                                         |
| μ/mm <sup>-1</sup>                 | 2.083                                                         |
| F(000)                             | 1792.0                                                        |
| Crystal size/mm <sup>3</sup>       | 0.200 × 0.200 × 0.100                                         |
| Radiation                          | MoKα (λ = 0.71073)                                            |
| 2θ range for data collection/°     | 3.1 to 41.624                                                 |
| Index ranges                       | -13 ≤ h ≤ 13, -20 ≤ k ≤ 20, -14 ≤ l ≤ 14                      |
| Reflections collected              | 34571                                                         |
| Independent reflections            | 7815 [R <sub>int</sub> = 0.0941, R <sub>sigma</sub> = 0.0704] |
| Data/restraints/parameters         | 7815/1057/944                                                 |
| Goodness-of-fit on F <sup>2</sup>  | 1.031                                                         |
| Final R indexes [I ≥ 2σ (I)]       | R <sub>1</sub> = 0.0380, wR <sub>2</sub> = 0.0667             |
| Final R indexes [all data]         | R <sub>1</sub> = 0.0556, wR <sub>2</sub> = 0.0731             |

**Table S11.** Fractional Atomic Coordinates (×10<sup>4</sup>) and Equivalent Isotropic Displacement Parameters (Å<sup>2</sup>×10<sup>3</sup>) for **3**. U<sub>eq</sub> is defined as 1/3 of the trace of the orthogonalised U<sub>ij</sub> tensor.

| Atom | x          | y          | z          | U(eq)    |
|------|------------|------------|------------|----------|
| Br1  | 4831.1(10) | 4832.4(7)  | -673.0(10) | 18.7(4)  |
| Ni1  | 4431.7(13) | 3948.5(9)  | 70.4(13)   | 13.9(5)  |
| Fe1  | 4786.4(15) | 1937.0(10) | -27.3(14)  | 15.1(6)  |
| P1   | 3666(3)    | 3220.3(19) | 572(3)     | 14.0(10) |
| P2   | 5805(3)    | 3389(2)    | -43(3)     | 14.6(10) |
| C1   | 3495(10)   | 4521(7)    | 322(10)    | 17(3)    |
| C2   | 2502(10)   | 4694(7)    | -403(10)   | 22(2)    |
| C3   | 1882(10)   | 5145(7)    | -170(10)   | 22(2)    |

|     |            |            |            |         |
|-----|------------|------------|------------|---------|
| C4  | 2267(11)   | 5405(7)    | 781(11)    | 26(4)   |
| C5  | 3281(10)   | 5228(7)    | 1520(10)   | 26(3)   |
| C6  | 3874(10)   | 4785(7)    | 1293(9)    | 17(3)   |
| C7  | 2075(9)    | 4440(7)    | -1465(10)  | 25(3)   |
| C8  | 914(10)    | 4565(7)    | -2186(10)  | 52(5)   |
| C9  | 3576(9)    | 2444(7)    | 25(10)     | 13(3)   |
| C10 | 3357(9)    | 2339(7)    | -1002(10)  | 15(3)   |
| C11 | 3320(9)    | 1672(7)    | -1182(11)  | 15(3)   |
| C12 | 3505(10)   | 1347(8)    | -262(10)   | 18(3)   |
| C13 | 3652(9)    | 1814(7)    | 468(10)    | 17(3)   |
| C14 | 5996(10)   | 2538(7)    | 175(10)    | 16(3)   |
| C15 | 6222(9)    | 2212(7)    | 1118(10)   | 15(3)   |
| C16 | 6241(9)    | 1547(8)    | 945(11)    | 19(3)   |
| C17 | 6062(9)    | 1448(8)    | -62(10)    | 16(3)   |
| C18 | 5930(10)   | 2038(7)    | -534(10)   | 16(3)   |
| C19 | 2265(9)    | 3326(7)    | 355(10)    | 14(3)   |
| C20 | 1424(10)   | 3058(8)    | -495(10)   | 21(4)   |
| C21 | 351(10)    | 3165(8)    | -692(11)   | 27(4)   |
| C22 | 117(10)    | 3540(8)    | -46(11)    | 21(3)   |
| C23 | 954(10)    | 3801(7)    | 795(10)    | 17(3)   |
| C24 | 2006(10)   | 3692(7)    | 988(11)    | 16(3)   |
| C25 | 4385(9)    | 3120(7)    | 1935(9)    | 10(3)   |
| C26 | 3936(10)   | 2789(7)    | 2466(10)   | 13(3)   |
| C27 | 4506(10)   | 2722(7)    | 3504(10)   | 16(3)   |
| C28 | 5535(10)   | 2983(8)    | 4006(10)   | 21(4)   |
| C29 | 5980(10)   | 3300(7)    | 3507(10)   | 18(3)   |
| C30 | 5416(9)    | 3367(7)    | 2459(11)   | 15(3)   |
| C31 | 5732(10)   | 3427(7)    | -1321(10)  | 14(3)   |
| C32 | 6617(11)   | 3342(8)    | -1481(11)  | 21(4)   |
| C33 | 6536(11)   | 3346(8)    | -2455(10)  | 21(4)   |
| C34 | 5538(10)   | 3437(8)    | -3266(11)  | 25(4)   |
| C35 | 4631(11)   | 3510(8)    | -3089(10)  | 22(4)   |
| C36 | 4717(10)   | 3508(7)    | -2128(10)  | 15(4)   |
| C37 | 7174(10)   | 3684(7)    | 780(10)    | 18(3)   |
| C38 | 7402(10)   | 4330(7)    | 974(10)    | 25(4)   |
| C39 | 8440(10)   | 4538(7)    | 1583(10)   | 30(4)   |
| C40 | 9274(10)   | 4119(7)    | 2016(9)    | 19(3)   |
| C41 | 9070(10)   | 3485(8)    | 1813(11)   | 29(4)   |
| C42 | 8037(9)    | 3255(8)    | 1217(10)   | 21(3)   |
| Br2 | 9616.3(10) | 5155.7(7)  | 4182.9(10) | 19.6(4) |
| Ni2 | 9130.8(12) | 6042.6(9)  | 4850.5(13) | 14.4(5) |
| Fe2 | 9648.4(14) | 8045.7(10) | 4910.0(14) | 16.3(6) |

|     |           |            |          |          |
|-----|-----------|------------|----------|----------|
| P3  | 10575(3)  | 6576(2)    | 4835(3)  | 14.4(10) |
| P4  | 8431(3)   | 6771.3(19) | 5398(3)  | 14.2(10) |
| C43 | 8127(11)  | 5483(7)    | 5015(10) | 20(3)    |
| C44 | 7089(9)   | 5327(6)    | 4274(9)  | 16(3)    |
| C45 | 6467(9)   | 4886(7)    | 4476(9)  | 20(3)    |
| C46 | 6864(10)  | 4576(7)    | 5402(10) | 22(3)    |
| C47 | 7893(10)  | 4720(7)    | 6145(10) | 20(3)    |
| C48 | 8529(10)  | 5170(7)    | 5948(10) | 19(3)    |
| C49 | 6604(10)  | 5631(7)    | 3252(9)  | 20(3)    |
| C50 | 6684(9)   | 5214(6)    | 2442(8)  | 27(3)    |
| C51 | 10840(9)  | 7424(7)    | 5102(10) | 14(3)    |
| C52 | 10779(10) | 7909(7)    | 4416(11) | 18(3)    |
| C53 | 10967(9)  | 8510(8)    | 4931(11) | 16(3)    |
| C54 | 11150(10) | 8398(8)    | 5916(11) | 21(3)    |
| C55 | 11071(9)  | 7723(7)    | 6042(10) | 13(3)    |
| C56 | 8391(10)  | 7576(7)    | 4923(10) | 14(3)    |
| C57 | 8212(9)   | 7704(7)    | 3904(10) | 16(3)    |
| C58 | 8223(10)  | 8381(7)    | 3782(12) | 23(3)    |
| C59 | 8397(10)  | 8651(8)    | 4697(11) | 25(3)    |
| C60 | 8495(9)   | 8165(7)    | 5404(10) | 18(3)    |
| C61 | 10554(9)  | 6544(7)    | 3595(10) | 12(3)    |
| C62 | 11483(10) | 6619(8)    | 3458(11) | 20(4)    |
| C63 | 11409(11) | 6620(8)    | 2498(10) | 25(4)    |
| C64 | 10414(10) | 6548(8)    | 1676(11) | 23(4)    |
| C65 | 9499(11)  | 6480(8)    | 1772(11) | 22(4)    |
| C66 | 9566(10)  | 6467(7)    | 2731(10) | 18(4)    |
| C67 | 11911(10) | 6248(7)    | 5716(10) | 16(3)    |
| C68 | 12847(9)  | 6614(7)    | 6020(9)  | 15(3)    |
| C69 | 13836(10) | 6393(7)    | 6650(10) | 22(4)    |
| C70 | 13941(10) | 5758(7)    | 6985(10) | 22(3)    |
| C72 | 13035(9)  | 5393(7)    | 6727(9)  | 20(3)    |
| C73 | 12035(10) | 5631(6)    | 6103(9)  | 17(3)    |
| C74 | 7027(9)   | 6684(7)    | 5193(10) | 12(3)    |
| C75 | 6765(11)  | 6294(7)    | 5818(10) | 19(4)    |
| C76 | 5697(10)  | 6194(7)    | 5605(11) | 24(4)    |
| C77 | 4870(11)  | 6474(8)    | 4750(10) | 26(4)    |
| C78 | 5116(10)  | 6850(8)    | 4143(10) | 22(4)    |
| C79 | 6191(10)  | 6964(7)    | 4363(9)  | 16(3)    |
| C80 | 9180(10)  | 6860(7)    | 6761(10) | 17(3)    |
| C81 | 10187(10) | 6554(7)    | 7283(10) | 16(3)    |
| C82 | 10780(11) | 6599(7)    | 8316(10) | 22(4)    |
| C83 | 10350(11) | 6934(8)    | 8876(11) | 24(4)    |

|     |          |          |          |        |
|-----|----------|----------|----------|--------|
| C84 | 9334(10) | 7206(8)  | 8374(11) | 24(4)  |
| C85 | 8761(11) | 7177(8)  | 7338(10) | 21(4)  |
| O1  | 7835(7)  | 9248(5)  | 6706(8)  | 33(3)  |
| C86 | 6723(10) | 9106(8)  | 6080(11) | 34(4)  |
| C87 | 6340(11) | 9616(7)  | 5280(10) | 28(3)  |
| C88 | 6969(10) | 10201(8) | 5883(10) | 27(3)  |
| C89 | 8026(10) | 9918(7)  | 6636(11) | 31(4)  |
| O2  | 3124(8)  | 708(5)   | 1817(9)  | 43(3)  |
| C90 | 3129(10) | 26(8)    | 1898(11) | 32(4)  |
| C91 | 1981(10) | -186(9)  | 1204(12) | 46(4)  |
| C92 | 1420(40) | 390(20)  | 570(50)  | 64(16) |
| C93 | 1350(20) | 423(12)  | 1250(40) | 37(9)  |
| C94 | 2065(12) | 908(9)   | 1238(13) | 44(4)  |

**Table S12.** Anisotropic Displacement Parameters ( $\text{\AA}^2 \times 10^3$ ) for **3**. The Anisotropic displacement factor exponent takes the form:  $-2\pi^2[h^2a^{*2}U_{11}+2hka^*b^*U_{12}+\dots]$ .

| Atom | U <sub>11</sub> | U <sub>22</sub> | U <sub>33</sub> | U <sub>23</sub> | U <sub>13</sub> | U <sub>12</sub> |
|------|-----------------|-----------------|-----------------|-----------------|-----------------|-----------------|
| Br1  | 20.0(7)         | 15.5(9)         | 22.2(8)         | 3.7(7)          | 10.9(7)         | 0.8(7)          |
| Ni1  | 14.4(9)         | 11.9(11)        | 17.0(10)        | 0.8(8)          | 8.6(8)          | 0.7(8)          |
| Fe1  | 14.0(11)        | 13.4(14)        | 17.0(11)        | -0.3(11)        | 6.3(10)         | 2.2(9)          |
| P1   | 15.0(18)        | 12(2)           | 14(2)           | -1.1(17)        | 6.4(17)         | -0.1(16)        |
| P2   | 15.3(19)        | 14(2)           | 15(2)           | 0.7(16)         | 7.7(18)         | -0.1(16)        |
| C1   | 21(6)           | 19(7)           | 14(5)           | 5(5)            | 11(5)           | 3(5)            |
| C2   | 22(5)           | 18(6)           | 28(4)           | 10(4)           | 14(4)           | -2(4)           |
| C3   | 22(5)           | 18(6)           | 28(4)           | 10(4)           | 14(4)           | -2(4)           |
| C4   | 25(7)           | 24(9)           | 40(7)           | 5(6)            | 24(6)           | 4(6)            |
| C5   | 27(6)           | 21(8)           | 37(7)           | -5(6)           | 21(6)           | -3(6)           |
| C6   | 18(6)           | 18(7)           | 21(6)           | 0(5)            | 14(5)           | 1(5)            |
| C7   | 19(6)           | 24(8)           | 24(6)           | 6(5)            | 3(5)            | 6(6)            |
| C8   | 30(7)           | 53(11)          | 43(9)           | -11(8)          | -10(7)          | 16(7)           |
| C9   | 9(6)            | 13(5)           | 15(6)           | 1(4)            | 3(5)            | -1(4)           |
| C10  | 11(6)           | 11(6)           | 18(6)           | -2(4)           | 3(5)            | 1(5)            |
| C11  | 13(6)           | 14(7)           | 22(6)           | -6(5)           | 10(5)           | -2(5)           |
| C12  | 11(6)           | 16(6)           | 28(6)           | -1(5)           | 10(5)           | 2(5)            |
| C13  | 15(6)           | 13(6)           | 24(6)           | 3(5)            | 10(5)           | 4(5)            |
| C14  | 14(6)           | 15(5)           | 22(6)           | 0(4)            | 10(5)           | -3(4)           |
| C15  | 8(6)            | 16(7)           | 17(5)           | -2(4)           | 2(5)            | -4(5)           |
| C16  | 13(6)           | 17(7)           | 24(6)           | 2(5)            | 5(5)            | 2(5)            |
| C17  | 11(6)           | 13(7)           | 23(6)           | -3(5)           | 7(5)            | -1(5)           |
| C18  | 16(6)           | 14(7)           | 21(6)           | -2(5)           | 10(5)           | -1(5)           |
| C19  | 15(5)           | 7(7)            | 25(6)           | 1(5)            | 14(5)           | -4(5)           |
| C20  | 19(6)           | 19(9)           | 24(7)           | 1(6)            | 10(5)           | 2(5)            |

|     |          |          |          |          |         |          |
|-----|----------|----------|----------|----------|---------|----------|
| C21 | 16(6)    | 33(10)   | 26(7)    | 7(7)     | 5(5)    | 5(6)     |
| C22 | 13(6)    | 21(9)    | 32(7)    | 12(6)    | 12(5)   | 8(5)     |
| C23 | 21(6)    | 11(8)    | 26(7)    | 12(6)    | 15(5)   | 6(5)     |
| C24 | 16(6)    | 8(8)     | 24(7)    | 4(6)     | 11(5)   | 2(5)     |
| C25 | 12(5)    | 5(7)     | 16(5)    | -3(5)    | 8(4)    | -2(5)    |
| C26 | 9(6)     | 9(8)     | 23(6)    | -1(5)    | 8(5)    | -3(5)    |
| C27 | 22(6)    | 5(8)     | 23(6)    | 1(5)     | 12(5)   | 4(5)     |
| C28 | 19(6)    | 20(9)    | 21(6)    | 1(6)     | 7(5)    | 2(5)     |
| C29 | 16(6)    | 12(8)    | 22(6)    | -6(5)    | 6(5)    | -1(5)    |
| C30 | 16(6)    | 7(8)     | 22(6)    | -3(5)    | 8(5)    | -1(5)    |
| C31 | 19(5)    | 5(9)     | 18(5)    | -3(5)    | 8(5)    | -1(5)    |
| C32 | 22(6)    | 18(10)   | 25(6)    | -8(6)    | 13(5)   | -4(6)    |
| C33 | 21(6)    | 23(11)   | 24(6)    | -9(6)    | 14(5)   | -8(6)    |
| C34 | 31(6)    | 30(12)   | 16(7)    | -4(6)    | 13(5)   | -10(6)   |
| C35 | 28(6)    | 21(10)   | 15(6)    | 0(6)     | 7(6)    | -10(6)   |
| C36 | 19(6)    | 12(10)   | 15(6)    | 0(5)     | 9(5)    | -3(5)    |
| C37 | 20(5)    | 15(6)    | 17(7)    | 0(5)     | 6(5)    | -1(4)    |
| C38 | 20(6)    | 14(6)    | 28(8)    | 4(5)     | -1(6)   | 1(5)     |
| C39 | 18(6)    | 25(7)    | 35(8)    | -9(6)    | 2(6)    | -7(5)    |
| C40 | 17(6)    | 35(7)    | 7(7)     | 2(5)     | 6(5)    | -1(5)    |
| C41 | 9(6)     | 35(8)    | 31(9)    | -3(6)    | -1(6)   | 0(5)     |
| C42 | 18(5)    | 21(7)    | 24(8)    | 2(6)     | 9(5)    | 0(5)     |
| Br2 | 19.2(8)  | 15.8(10) | 26.5(8)  | -5.7(7)  | 12.6(7) | -1.5(6)  |
| Ni2 | 13.7(9)  | 12.3(11) | 17.9(10) | -1.4(9)  | 7.8(9)  | 0.1(8)   |
| Fe2 | 12.2(10) | 13.6(14) | 22.7(11) | 2.8(11)  | 7.6(10) | 1.9(9)   |
| P3  | 14.7(18) | 11(2)    | 17(2)    | -0.5(17) | 6.9(17) | 1.0(16)  |
| P4  | 14.1(19) | 12(2)    | 18(2)    | 0.8(17)  | 8.4(17) | -0.2(16) |
| C43 | 21(6)    | 17(7)    | 24(6)    | -3(5)    | 11(5)   | 0(5)     |
| C44 | 18(6)    | 14(7)    | 20(5)    | -7(5)    | 13(5)   | -3(5)    |
| C45 | 15(6)    | 20(7)    | 24(6)    | 2(5)     | 9(5)    | 0(5)     |
| C46 | 27(6)    | 18(8)    | 27(6)    | -1(5)    | 16(5)   | -3(5)    |
| C47 | 27(6)    | 18(8)    | 19(7)    | 3(6)     | 13(5)   | 9(5)     |
| C48 | 25(7)    | 12(7)    | 24(6)    | -13(5)   | 14(5)   | 1(6)     |
| C49 | 21(7)    | 19(8)    | 21(6)    | 0(5)     | 10(5)   | -5(6)    |
| C50 | 24(7)    | 30(8)    | 23(6)    | -12(6)   | 8(6)    | -14(6)   |
| C51 | 9(6)     | 16(5)    | 13(6)    | -2(4)    | 2(5)    | 0(4)     |
| C52 | 18(6)    | 14(7)    | 20(6)    | 4(5)     | 8(5)    | 0(5)     |
| C53 | 5(6)     | 15(7)    | 27(7)    | 2(5)     | 7(5)    | -2(5)    |
| C54 | 17(6)    | 14(7)    | 29(6)    | -3(5)    | 10(5)   | 0(5)     |
| C55 | 9(5)     | 12(6)    | 18(5)    | -1(5)    | 4(5)    | -4(5)    |
| C56 | 12(6)    | 11(6)    | 18(6)    | 2(4)     | 6(5)    | 2(4)     |
| C57 | 8(6)     | 16(7)    | 23(6)    | 4(5)     | 6(5)    | 0(5)     |

|     |        |        |        |        |        |        |
|-----|--------|--------|--------|--------|--------|--------|
| C58 | 17(6)  | 18(7)  | 32(6)  | 12(5)  | 8(5)   | 1(5)   |
| C59 | 16(6)  | 20(7)  | 37(7)  | 9(5)   | 10(6)  | 3(5)   |
| C60 | 15(6)  | 14(7)  | 24(6)  | 0(5)   | 7(5)   | 0(5)   |
| C61 | 15(5)  | 5(8)   | 19(5)  | 2(5)   | 10(4)  | 3(5)   |
| C62 | 14(6)  | 27(10) | 19(6)  | 0(6)   | 7(5)   | 2(6)   |
| C63 | 26(6)  | 34(12) | 21(6)  | 3(6)   | 16(5)  | 3(6)   |
| C64 | 29(6)  | 22(11) | 19(6)  | 7(6)   | 12(5)  | 10(6)  |
| C65 | 18(6)  | 27(11) | 15(6)  | 5(6)   | 4(5)   | 11(6)  |
| C66 | 21(6)  | 10(10) | 20(6)  | -1(5)  | 8(5)   | -4(5)  |
| C67 | 16(5)  | 13(6)  | 17(7)  | 1(5)   | 6(5)   | 4(4)   |
| C68 | 19(5)  | 15(7)  | 14(7)  | 2(5)   | 10(5)  | 4(5)   |
| C69 | 16(6)  | 30(7)  | 19(8)  | 1(6)   | 6(5)   | 1(5)   |
| C70 | 14(6)  | 35(7)  | 14(8)  | 9(6)   | 3(6)   | 9(5)   |
| C72 | 19(6)  | 20(7)  | 16(7)  | -4(5)  | 4(5)   | 6(5)   |
| C73 | 18(6)  | 14(6)  | 15(7)  | 0(5)   | 5(5)   | 1(5)   |
| C74 | 14(5)  | 6(8)   | 14(6)  | -4(5)  | 5(4)   | -3(5)  |
| C75 | 22(6)  | 17(9)  | 21(7)  | 0(6)   | 12(5)  | 4(5)   |
| C76 | 25(6)  | 16(9)  | 36(7)  | 0(6)   | 18(6)  | -2(5)  |
| C77 | 21(7)  | 28(9)  | 36(8)  | -3(6)  | 18(6)  | -3(6)  |
| C78 | 14(6)  | 23(9)  | 28(7)  | -2(6)  | 7(5)   | 0(5)   |
| C79 | 20(6)  | 12(8)  | 19(7)  | 0(6)   | 12(5)  | 0(5)   |
| C80 | 16(6)  | 16(8)  | 17(5)  | -1(5)  | 5(4)   | -2(5)  |
| C81 | 17(6)  | 12(8)  | 19(6)  | -1(5)  | 8(5)   | -3(5)  |
| C82 | 24(7)  | 22(9)  | 19(6)  | 5(6)   | 9(5)   | -3(6)  |
| C83 | 26(7)  | 28(9)  | 21(7)  | -4(6)  | 12(6)  | -16(6) |
| C84 | 24(6)  | 26(9)  | 26(6)  | -7(6)  | 16(5)  | -12(6) |
| C85 | 23(7)  | 18(9)  | 24(6)  | -5(5)  | 13(5)  | -10(6) |
| O1  | 32(5)  | 22(6)  | 38(6)  | 5(5)   | 11(5)  | 2(4)   |
| C86 | 30(7)  | 22(8)  | 49(8)  | 2(6)   | 17(6)  | 0(6)   |
| C87 | 23(7)  | 29(8)  | 36(7)  | -1(5)  | 17(6)  | 1(5)   |
| C88 | 29(7)  | 18(7)  | 35(7)  | 4(5)   | 16(6)  | 5(5)   |
| C89 | 33(7)  | 22(7)  | 39(8)  | 2(6)   | 16(6)  | 0(5)   |
| O2  | 37(5)  | 30(6)  | 55(7)  | 0(5)   | 15(5)  | -7(4)  |
| C90 | 29(6)  | 28(8)  | 44(8)  | -1(6)  | 21(6)  | -4(5)  |
| C91 | 31(7)  | 34(7)  | 67(10) | -2(7)  | 16(7)  | -5(6)  |
| C92 | 50(15) | 41(12) | 74(19) | -3(10) | 4(15)  | 2(9)   |
| C93 | 24(9)  | 42(10) | 40(20) | 10(10) | 10(10) | 2(7)   |
| C94 | 46(7)  | 32(8)  | 56(10) | 6(7)   | 24(7)  | 3(6)   |

**Table S13.** Bond Lengths for **3**.

| Atom | Atom | Length/Å | Atom | Atom | Length/Å  |
|------|------|----------|------|------|-----------|
| Br1  | Ni1  | 2.323(2) | Fe2  | C51  | 1.999(14) |

|     |     |           |     |     |           |
|-----|-----|-----------|-----|-----|-----------|
| Ni1 | C1  | 1.905(14) | Fe2 | C52 | 2.007(15) |
| Ni1 | P1  | 2.151(4)  | Fe2 | C55 | 2.026(12) |
| Ni1 | P2  | 2.281(4)  | Fe2 | C60 | 2.032(14) |
| Fe1 | C14 | 1.989(14) | Fe2 | C59 | 2.034(15) |
| Fe1 | C9  | 1.996(14) | Fe2 | C58 | 2.035(13) |
| Fe1 | C13 | 2.009(14) | Fe2 | C53 | 2.036(14) |
| Fe1 | C15 | 2.014(12) | Fe2 | C54 | 2.055(13) |
| Fe1 | C10 | 2.017(12) | P3  | C51 | 1.804(15) |
| Fe1 | C16 | 2.027(13) | P3  | C61 | 1.813(15) |
| Fe1 | C18 | 2.029(14) | P3  | C67 | 1.833(13) |
| Fe1 | C11 | 2.039(12) | P4  | C56 | 1.801(15) |
| Fe1 | C12 | 2.040(14) | P4  | C80 | 1.805(13) |
| Fe1 | C17 | 2.043(14) | P4  | C74 | 1.819(13) |
| P1  | C9  | 1.779(15) | C43 | C44 | 1.387(16) |
| P1  | C25 | 1.806(12) | C43 | C48 | 1.388(19) |
| P1  | C19 | 1.813(13) | C44 | C45 | 1.371(17) |
| P2  | C14 | 1.792(15) | C44 | C49 | 1.483(17) |
| P2  | C37 | 1.822(13) | C45 | C46 | 1.378(18) |
| P2  | C31 | 1.840(15) | C46 | C47 | 1.374(16) |
| C1  | C2  | 1.346(16) | C47 | C48 | 1.393(19) |
| C1  | C6  | 1.394(18) | C49 | C50 | 1.516(17) |
| C2  | C3  | 1.407(19) | C51 | C52 | 1.40(2)   |
| C2  | C7  | 1.496(18) | C51 | C55 | 1.415(19) |
| C3  | C4  | 1.365(19) | C52 | C53 | 1.42(2)   |
| C4  | C5  | 1.375(17) | C53 | C54 | 1.38(2)   |
| C5  | C6  | 1.364(18) | C54 | C55 | 1.42(2)   |
| C7  | C8  | 1.486(16) | C56 | C60 | 1.386(19) |
| C9  | C10 | 1.419(19) | C56 | C57 | 1.431(19) |
| C9  | C13 | 1.444(19) | C57 | C58 | 1.417(19) |
| C10 | C11 | 1.406(19) | C58 | C59 | 1.38(2)   |
| C11 | C12 | 1.43(2)   | C59 | C60 | 1.41(2)   |
| C12 | C13 | 1.393(19) | C61 | C62 | 1.39(2)   |
| C14 | C18 | 1.445(19) | C61 | C66 | 1.389(16) |
| C14 | C15 | 1.45(2)   | C62 | C63 | 1.37(2)   |
| C15 | C16 | 1.40(2)   | C63 | C64 | 1.365(17) |
| C16 | C17 | 1.40(2)   | C64 | C65 | 1.33(2)   |
| C17 | C18 | 1.38(2)   | C65 | C66 | 1.374(19) |
| C19 | C24 | 1.367(19) | C67 | C73 | 1.378(18) |
| C19 | C20 | 1.381(18) | C67 | C68 | 1.382(18) |
| C20 | C21 | 1.383(19) | C68 | C69 | 1.334(17) |
| C21 | C22 | 1.37(2)   | C69 | C70 | 1.390(19) |
| C22 | C23 | 1.365(19) | C70 | C72 | 1.355(17) |

|     |     |           |     |     |           |
|-----|-----|-----------|-----|-----|-----------|
| C23 | C24 | 1.358(18) | C72 | C73 | 1.355(16) |
| C25 | C30 | 1.369(17) | C74 | C79 | 1.373(18) |
| C25 | C26 | 1.377(18) | C74 | C75 | 1.388(19) |
| C26 | C27 | 1.374(18) | C75 | C76 | 1.369(19) |
| C27 | C28 | 1.375(18) | C76 | C77 | 1.386(18) |
| C28 | C29 | 1.322(18) | C77 | C78 | 1.339(19) |
| C29 | C30 | 1.386(18) | C78 | C79 | 1.380(18) |
| C31 | C32 | 1.35(2)   | C80 | C85 | 1.386(19) |
| C31 | C36 | 1.374(16) | C80 | C81 | 1.394(18) |
| C32 | C33 | 1.388(19) | C81 | C82 | 1.367(18) |
| C33 | C34 | 1.366(17) | C82 | C83 | 1.39(2)   |
| C34 | C35 | 1.39(2)   | C83 | C84 | 1.37(2)   |
| C35 | C36 | 1.366(19) | C84 | C85 | 1.367(19) |
| C37 | C38 | 1.376(19) | O1  | C86 | 1.413(15) |
| C37 | C42 | 1.387(18) | O1  | C89 | 1.425(18) |
| C38 | C39 | 1.367(16) | C86 | C87 | 1.49(2)   |
| C39 | C40 | 1.347(17) | C87 | C88 | 1.521(19) |
| C40 | C41 | 1.349(19) | C88 | C89 | 1.493(17) |
| C41 | C42 | 1.374(17) | O2  | C94 | 1.376(16) |
| Br2 | Ni2 | 2.320(3)  | O2  | C90 | 1.419(18) |
| Ni2 | C43 | 1.898(14) | C90 | C91 | 1.506(18) |
| Ni2 | P4  | 2.133(4)  | C91 | C92 | 1.50(5)   |
| Ni2 | P3  | 2.278(4)  | C91 | C93 | 1.55(3)   |
| Fe2 | C57 | 1.987(12) | C92 | C94 | 1.45(5)   |
| Fe2 | C56 | 1.988(14) | C93 | C94 | 1.41(3)   |

**Table S14.** Bond Angles for **3**.

| Atom | Atom | Atom | Angle/°    | Atom | Atom | Atom | Angle/°  |
|------|------|------|------------|------|------|------|----------|
| C1   | Ni1  | P1   | 83.9(4)    | C57  | Fe2  | C51  | 110.4(6) |
| C1   | Ni1  | P2   | 169.4(4)   | C56  | Fe2  | C51  | 109.9(6) |
| P1   | Ni1  | P2   | 102.43(16) | C57  | Fe2  | C52  | 110.4(6) |
| C1   | Ni1  | Br1  | 85.6(4)    | C56  | Fe2  | C52  | 138.6(6) |
| P1   | Ni1  | Br1  | 166.08(12) | C51  | Fe2  | C52  | 40.9(6)  |
| P2   | Ni1  | Br1  | 89.37(13)  | C57  | Fe2  | C55  | 139.4(6) |
| C14  | Fe1  | C9   | 108.4(6)   | C56  | Fe2  | C55  | 110.4(6) |
| C14  | Fe1  | C13  | 139.1(6)   | C51  | Fe2  | C55  | 41.2(5)  |
| C9   | Fe1  | C13  | 42.3(6)    | C52  | Fe2  | C55  | 68.7(6)  |
| C14  | Fe1  | C15  | 42.4(6)    | C57  | Fe2  | C60  | 68.9(6)  |
| C9   | Fe1  | C15  | 109.6(6)   | C56  | Fe2  | C60  | 40.3(5)  |
| C13  | Fe1  | C15  | 110.9(6)   | C51  | Fe2  | C60  | 138.3(6) |
| C14  | Fe1  | C10  | 109.0(6)   | C52  | Fe2  | C60  | 178.9(6) |
| C9   | Fe1  | C10  | 41.4(5)    | C55  | Fe2  | C60  | 111.3(5) |



|     |     |     |          |     |     |     |          |
|-----|-----|-----|----------|-----|-----|-----|----------|
| C13 | Fe1 | C10 | 69.3(6)  | C57 | Fe2 | C59 | 67.7(6)  |
| C15 | Fe1 | C10 | 138.6(6) | C56 | Fe2 | C59 | 68.2(6)  |
| C14 | Fe1 | C16 | 69.8(6)  | C51 | Fe2 | C59 | 177.9(6) |
| C9  | Fe1 | C16 | 139.0(6) | C52 | Fe2 | C59 | 140.1(6) |
| C13 | Fe1 | C16 | 111.7(6) | C55 | Fe2 | C59 | 139.9(6) |
| C15 | Fe1 | C16 | 40.7(6)  | C60 | Fe2 | C59 | 40.6(6)  |
| C10 | Fe1 | C16 | 178.8(6) | C57 | Fe2 | C58 | 41.2(5)  |
| C14 | Fe1 | C18 | 42.2(6)  | C56 | Fe2 | C58 | 69.9(6)  |
| C9  | Fe1 | C18 | 139.0(6) | C51 | Fe2 | C58 | 139.5(6) |
| C13 | Fe1 | C18 | 178.6(6) | C52 | Fe2 | C58 | 111.6(6) |
| C15 | Fe1 | C18 | 69.6(6)  | C55 | Fe2 | C58 | 179.3(6) |
| C10 | Fe1 | C18 | 111.2(6) | C60 | Fe2 | C58 | 68.5(6)  |
| C16 | Fe1 | C18 | 67.8(6)  | C59 | Fe2 | C58 | 39.5(6)  |
| C14 | Fe1 | C11 | 137.5(6) | C57 | Fe2 | C53 | 139.1(6) |
| C9  | Fe1 | C11 | 69.4(5)  | C56 | Fe2 | C53 | 178.3(6) |
| C13 | Fe1 | C11 | 68.5(6)  | C51 | Fe2 | C53 | 68.8(6)  |
| C15 | Fe1 | C11 | 179.0(6) | C52 | Fe2 | C53 | 41.1(6)  |
| C10 | Fe1 | C11 | 40.6(5)  | C55 | Fe2 | C53 | 67.9(6)  |
| C16 | Fe1 | C11 | 140.2(6) | C60 | Fe2 | C53 | 140.0(6) |
| C18 | Fe1 | C11 | 111.0(6) | C59 | Fe2 | C53 | 113.1(6) |
| C14 | Fe1 | C12 | 177.9(6) | C58 | Fe2 | C53 | 111.8(6) |
| C9  | Fe1 | C12 | 69.8(6)  | C57 | Fe2 | C54 | 178.2(6) |
| C13 | Fe1 | C12 | 40.2(5)  | C56 | Fe2 | C54 | 139.4(6) |
| C15 | Fe1 | C12 | 139.0(6) | C51 | Fe2 | C54 | 68.7(6)  |
| C10 | Fe1 | C12 | 68.9(6)  | C52 | Fe2 | C54 | 67.9(6)  |
| C16 | Fe1 | C12 | 112.3(6) | C55 | Fe2 | C54 | 40.8(5)  |
| C18 | Fe1 | C12 | 138.5(6) | C60 | Fe2 | C54 | 112.8(6) |
| C11 | Fe1 | C12 | 41.0(6)  | C59 | Fe2 | C54 | 113.2(7) |
| C14 | Fe1 | C17 | 69.4(6)  | C58 | Fe2 | C54 | 138.6(6) |
| C9  | Fe1 | C17 | 177.8(6) | C53 | Fe2 | C54 | 39.3(5)  |
| C13 | Fe1 | C17 | 139.2(6) | C51 | P3  | C61 | 99.5(7)  |
| C15 | Fe1 | C17 | 68.6(6)  | C51 | P3  | C67 | 99.7(6)  |
| C10 | Fe1 | C17 | 139.2(6) | C61 | P3  | C67 | 104.9(6) |
| C16 | Fe1 | C17 | 40.4(6)  | C51 | P3  | Ni2 | 124.1(5) |
| C18 | Fe1 | C17 | 39.6(6)  | C61 | P3  | Ni2 | 111.9(4) |
| C11 | Fe1 | C17 | 112.3(6) | C67 | P3  | Ni2 | 114.2(5) |
| C12 | Fe1 | C17 | 112.3(6) | C56 | P4  | C80 | 103.9(7) |
| C9  | P1  | C25 | 106.9(6) | C56 | P4  | C74 | 100.5(6) |
| C9  | P1  | C19 | 100.2(6) | C80 | P4  | C74 | 103.0(6) |
| C25 | P1  | C19 | 102.5(6) | C56 | P4  | Ni2 | 116.8(5) |
| C9  | P1  | Ni1 | 115.1(5) | C80 | P4  | Ni2 | 111.3(5) |
| C25 | P1  | Ni1 | 110.8(5) | C74 | P4  | Ni2 | 119.3(5) |

|     |     |     |           |     |     |     |           |
|-----|-----|-----|-----------|-----|-----|-----|-----------|
| C19 | P1  | Ni1 | 119.8(5)  | C44 | C43 | C48 | 118.6(13) |
| C14 | P2  | C37 | 100.8(6)  | C44 | C43 | Ni2 | 126.1(10) |
| C14 | P2  | C31 | 99.2(7)   | C48 | C43 | Ni2 | 115.1(10) |
| C37 | P2  | C31 | 103.4(6)  | C45 | C44 | C43 | 120.3(11) |
| C14 | P2  | Ni1 | 123.2(5)  | C45 | C44 | C49 | 117.6(10) |
| C37 | P2  | Ni1 | 114.7(5)  | C43 | C44 | C49 | 122.1(12) |
| C31 | P2  | Ni1 | 112.8(4)  | C44 | C45 | C46 | 121.2(12) |
| C2  | C1  | C6  | 119.1(13) | C47 | C46 | C45 | 119.5(13) |
| C2  | C1  | Ni1 | 122.8(10) | C46 | C47 | C48 | 119.6(12) |
| C6  | C1  | Ni1 | 118.1(9)  | C43 | C48 | C47 | 120.8(12) |
| C1  | C2  | C3  | 119.4(12) | C44 | C49 | C50 | 113.4(11) |
| C1  | C2  | C7  | 121.0(13) | C52 | C51 | C55 | 107.7(13) |
| C3  | C2  | C7  | 119.5(11) | C52 | C51 | P3  | 127.1(11) |
| C4  | C3  | C2  | 121.0(12) | C55 | C51 | P3  | 125.1(11) |
| C3  | C4  | C5  | 119.5(14) | C52 | C51 | Fe2 | 69.8(8)   |
| C6  | C5  | C4  | 119.3(13) | C55 | C51 | Fe2 | 70.4(8)   |
| C5  | C6  | C1  | 121.8(12) | P3  | C51 | Fe2 | 121.8(6)  |
| C8  | C7  | C2  | 118.3(12) | C51 | C52 | C53 | 107.9(13) |
| C10 | C9  | C13 | 106.2(12) | C51 | C52 | Fe2 | 69.2(8)   |
| C10 | C9  | P1  | 124.0(11) | C53 | C52 | Fe2 | 70.6(9)   |
| C13 | C9  | P1  | 129.7(11) | C54 | C53 | C52 | 108.5(15) |
| C10 | C9  | Fe1 | 70.1(8)   | C54 | C53 | Fe2 | 71.1(9)   |
| C13 | C9  | Fe1 | 69.4(8)   | C52 | C53 | Fe2 | 68.3(8)   |
| P1  | C9  | Fe1 | 127.2(7)  | C53 | C54 | C55 | 108.3(15) |
| C11 | C10 | C9  | 108.9(14) | C53 | C54 | Fe2 | 69.6(8)   |
| C11 | C10 | Fe1 | 70.6(7)   | C55 | C54 | Fe2 | 68.5(8)   |
| C9  | C10 | Fe1 | 68.5(7)   | C51 | C55 | C54 | 107.5(14) |
| C10 | C11 | C12 | 108.1(14) | C51 | C55 | Fe2 | 68.4(7)   |
| C10 | C11 | Fe1 | 68.9(7)   | C54 | C55 | Fe2 | 70.7(8)   |
| C12 | C11 | Fe1 | 69.5(7)   | C60 | C56 | C57 | 107.5(13) |
| C13 | C12 | C11 | 107.7(14) | C60 | C56 | P4  | 129.8(11) |
| C13 | C12 | Fe1 | 68.7(8)   | C57 | C56 | P4  | 122.7(11) |
| C11 | C12 | Fe1 | 69.5(8)   | C60 | C56 | Fe2 | 71.5(8)   |
| C12 | C13 | C9  | 109.0(13) | C57 | C56 | Fe2 | 68.9(8)   |
| C12 | C13 | Fe1 | 71.1(8)   | P4  | C56 | Fe2 | 125.7(7)  |
| C9  | C13 | Fe1 | 68.4(8)   | C58 | C57 | C56 | 108.1(14) |
| C18 | C14 | C15 | 105.8(13) | C58 | C57 | Fe2 | 71.2(8)   |
| C18 | C14 | P2  | 128.5(11) | C56 | C57 | Fe2 | 68.9(7)   |
| C15 | C14 | P2  | 125.7(11) | C59 | C58 | C57 | 106.6(15) |
| C18 | C14 | Fe1 | 70.4(8)   | C59 | C58 | Fe2 | 70.2(8)   |
| C15 | C14 | Fe1 | 69.7(8)   | C57 | C58 | Fe2 | 67.6(7)   |
| P2  | C14 | Fe1 | 123.1(7)  | C58 | C59 | C60 | 110.3(15) |

|     |     |     |           |     |     |     |           |
|-----|-----|-----|-----------|-----|-----|-----|-----------|
| C16 | C15 | C14 | 107.4(14) | C58 | C59 | Fe2 | 70.3(9)   |
| C16 | C15 | Fe1 | 70.2(7)   | C60 | C59 | Fe2 | 69.6(8)   |
| C14 | C15 | Fe1 | 67.9(7)   | C56 | C60 | C59 | 107.5(13) |
| C15 | C16 | C17 | 109.1(15) | C56 | C60 | Fe2 | 68.2(8)   |
| C15 | C16 | Fe1 | 69.2(8)   | C59 | C60 | Fe2 | 69.8(9)   |
| C17 | C16 | Fe1 | 70.4(8)   | C62 | C61 | C66 | 117.6(13) |
| C18 | C17 | C16 | 108.8(15) | C62 | C61 | P3  | 122.9(10) |
| C18 | C17 | Fe1 | 69.6(9)   | C66 | C61 | P3  | 119.5(10) |
| C16 | C17 | Fe1 | 69.2(8)   | C63 | C62 | C61 | 120.3(12) |
| C17 | C18 | C14 | 108.9(13) | C64 | C63 | C62 | 119.6(14) |
| C17 | C18 | Fe1 | 70.8(9)   | C65 | C64 | C63 | 122.1(15) |
| C14 | C18 | Fe1 | 67.4(8)   | C64 | C65 | C66 | 118.8(13) |
| C24 | C19 | C20 | 118.2(12) | C65 | C66 | C61 | 121.6(14) |
| C24 | C19 | P1  | 121.8(10) | C73 | C67 | C68 | 116.9(12) |
| C20 | C19 | P1  | 119.9(11) | C73 | C67 | P3  | 122.3(10) |
| C19 | C20 | C21 | 120.1(15) | C68 | C67 | P3  | 120.8(11) |
| C22 | C21 | C20 | 120.3(13) | C69 | C68 | C67 | 122.8(14) |
| C23 | C22 | C21 | 119.2(12) | C68 | C69 | C70 | 118.9(13) |
| C24 | C23 | C22 | 120.4(15) | C72 | C70 | C69 | 119.6(12) |
| C23 | C24 | C19 | 121.8(13) | C73 | C72 | C70 | 120.4(13) |
| C30 | C25 | C26 | 118.7(11) | C72 | C73 | C67 | 121.2(13) |
| C30 | C25 | P1  | 119.5(11) | C79 | C74 | C75 | 118.3(12) |
| C26 | C25 | P1  | 121.8(9)  | C79 | C74 | P4  | 120.2(11) |
| C27 | C26 | C25 | 120.3(12) | C75 | C74 | P4  | 121.3(10) |
| C26 | C27 | C28 | 119.4(14) | C76 | C75 | C74 | 120.5(12) |
| C29 | C28 | C27 | 121.1(13) | C75 | C76 | C77 | 119.9(15) |
| C28 | C29 | C30 | 120.1(12) | C78 | C77 | C76 | 120.0(13) |
| C25 | C30 | C29 | 120.4(14) | C77 | C78 | C79 | 120.5(13) |
| C32 | C31 | C36 | 120.5(14) | C74 | C79 | C78 | 120.8(14) |
| C32 | C31 | P2  | 122.2(10) | C85 | C80 | C81 | 117.3(12) |
| C36 | C31 | P2  | 117.1(10) | C85 | C80 | P4  | 122.9(10) |
| C31 | C32 | C33 | 121.3(13) | C81 | C80 | P4  | 119.6(12) |
| C34 | C33 | C32 | 119.1(14) | C82 | C81 | C80 | 121.9(15) |
| C33 | C34 | C35 | 118.8(14) | C81 | C82 | C83 | 119.5(13) |
| C36 | C35 | C34 | 121.9(13) | C84 | C83 | C82 | 119.0(13) |
| C35 | C36 | C31 | 118.4(13) | C85 | C84 | C83 | 121.1(15) |
| C38 | C37 | C42 | 117.5(12) | C84 | C85 | C80 | 121.1(13) |
| C38 | C37 | P2  | 122.4(10) | C86 | O1  | C89 | 109.7(10) |
| C42 | C37 | P2  | 120.1(12) | O1  | C86 | C87 | 105.0(12) |
| C39 | C38 | C37 | 121.1(13) | C86 | C87 | C88 | 101.6(11) |
| C40 | C39 | C38 | 121.3(14) | C89 | C88 | C87 | 103.0(12) |
| C39 | C40 | C41 | 118.4(12) | O1  | C89 | C88 | 106.8(11) |

|     |     |     |            |     |     |     |           |
|-----|-----|-----|------------|-----|-----|-----|-----------|
| C40 | C41 | C42 | 122.2(14)  | C94 | O2  | C90 | 108.5(11) |
| C41 | C42 | C37 | 119.5(15)  | O2  | C90 | C91 | 105.6(12) |
| C43 | Ni2 | P4  | 84.8(5)    | C92 | C91 | C90 | 106(2)    |
| C43 | Ni2 | P3  | 169.2(4)   | C90 | C91 | C93 | 99.4(16)  |
| P4  | Ni2 | P3  | 101.63(16) | C94 | C92 | C91 | 101(3)    |
| C43 | Ni2 | Br2 | 86.1(4)    | C94 | C93 | C91 | 100.4(19) |
| P4  | Ni2 | Br2 | 170.22(13) | O2  | C94 | C93 | 108.7(17) |
| P3  | Ni2 | Br2 | 87.90(13)  | O2  | C94 | C92 | 110(2)    |
| C57 | Fe2 | C56 | 42.2(6)    |     |     |     |           |

*X-ray Diffraction Data for (dppf)Ni(2-trifluoromethylphenyl)(Br) (4)*

Crystals suitable for X-ray diffraction were grown from a concentrated solution of **4** in THF layered with pentane at -15 °C. Low-temperature diffraction data ( $\omega$ -scans) were collected on a Rigaku SCX Mini diffractometer coupled to a Rigaku Mercury275R CCD with Mo K $\alpha$  radiation ( $\lambda = 0.71073$  Å) for the structure of **4**. The diffraction images were processed and scaled using Rigaku Oxford Diffraction software.<sup>10</sup> The structure was solved with SHELXT and was refined against  $F^2$  on all data by full-matrix least squares with SHELXL.<sup>11</sup> All non-hydrogen atoms were refined anisotropically. Hydrogen atoms were included in the model at geometrically calculated positions and refined using a riding model. The isotropic displacement parameters of all hydrogen atoms were fixed to 1.2 times the U value of the atoms to which they are linked (1.5 times for methyl groups). Seven reflections were omitted in which the Error/esd value was abnormally high. These reflections were located close to the beamstop. The full numbering scheme of compound **4** can be found in the full details of the X-ray structure determination (CIF), which is included as Supporting Information. CCDC number 1860566 contains the supplementary crystallographic data for this paper. These data can be obtained free of charge from The Cambridge Crystallographic Data Center via [www.ccdc.cam.ac.uk/data\\_request/cif](http://www.ccdc.cam.ac.uk/data_request/cif).

**Table S15.** Crystal data and structure refinement for **4**.

|                   |                                                                      |
|-------------------|----------------------------------------------------------------------|
| Empirical formula | C <sub>45</sub> H <sub>40</sub> BrF <sub>3</sub> FeNiOP <sub>2</sub> |
| Formula weight    | 910.18                                                               |
| Temperature/K     | 93.15                                                                |
| Crystal system    | Monoclinic                                                           |
| Space group       | P2 <sub>1</sub> /n                                                   |
| a/Å               | 13.6542(11)                                                          |
| b/Å               | 20.5256(11)                                                          |
| c/Å               | 14.8694(12)                                                          |

|                                                |                                                               |
|------------------------------------------------|---------------------------------------------------------------|
| $\alpha/^\circ$                                | 90                                                            |
| $\beta/^\circ$                                 | 116.959(10)                                                   |
| $\gamma/^\circ$                                | 90                                                            |
| Volume/ $\text{\AA}^3$                         | 3714.4(6)                                                     |
| Z                                              | 4                                                             |
| $\rho_{\text{calc}}/\text{g/cm}^3$             | 1.628                                                         |
| $\mu/\text{mm}^{-1}$                           | 2.112                                                         |
| F(000)                                         | 1856.0                                                        |
| Crystal size/ $\text{mm}^3$                    | $0.02 \times 0.01 \times 0.002$                               |
| Radiation                                      | MoK $\alpha$ ( $\lambda = 0.71073$ )                          |
| 2 $\Theta$ range for data collection/ $^\circ$ | 3.968 to 50.054                                               |
| Index ranges                                   | $-16 \leq h \leq 16, -24 \leq k \leq 24, -17 \leq l \leq 17$  |
| Reflections collected                          | 53046                                                         |
| Independent reflections                        | 6548 [ $R_{\text{int}} = 0.1311, R_{\text{sigma}} = 0.0673$ ] |
| Data/restraints/parameters                     | 6548/0/487                                                    |
| Goodness-of-fit on $F^2$                       | 1.011                                                         |
| Final R indexes [ $I \geq 2\sigma(I)$ ]        | $R_1 = 0.0447, wR_2 = 0.0929$                                 |
| Final R indexes [all data]                     | $R_1 = 0.0754, wR_2 = 0.1061$                                 |

**Table S16.** Fractional Atomic Coordinates ( $\times 10^4$ ) and Equivalent Isotropic Displacement Parameters ( $\text{\AA}^2 \times 10^3$ ) **4.**  $U_{\text{eq}}$  is defined as 1/3 of the trace of the orthogonalised  $U_{\text{H}}$  tensor.

| Atom | x         | y          | z         | $U(\text{eq})$ |
|------|-----------|------------|-----------|----------------|
| Br1  | 7151.0(4) | 7318.7(2)  | 1719.7(3) | 17.53(13)      |
| Ni1  | 6764.1(4) | 6447.6(3)  | 2486.9(4) | 12.82(15)      |
| Fe1  | 7261.9(5) | 4419.3(3)  | 2546.8(5) | 14.27(16)      |
| P1   | 6063.8(9) | 5706.5(5)  | 3041.0(8) | 12.6(3)        |
| P2   | 8164.6(9) | 5900.4(5)  | 2423.7(8) | 13.7(3)        |
| F1   | 4678(2)   | 6483.2(13) | 832.2(19) | 27.5(7)        |
| F2   | 4241(2)   | 7464.7(14) | 355(2)    | 33.8(7)        |
| F3   | 3187(2)   | 6882.4(14) | 708(2)    | 30.3(7)        |
| C1   | 5844(4)   | 7038(2)    | 2734(3)   | 16.5(10)       |
| C2   | 4803(4)   | 7248(2)    | 2063(4)   | 19.7(11)       |
| C3   | 4235(4)   | 7704(2)    | 2334(4)   | 24.7(12)       |
| C4   | 4689(4)   | 7958(2)    | 3279(4)   | 27.6(12)       |
| C5   | 5733(4)   | 7771(2)    | 3957(4)   | 23.3(11)       |
| C6   | 6299(4)   | 7328(2)    | 3696(3)   | 19.5(10)       |
| C7   | 4245(4)   | 7021(2)    | 1012(4)   | 23.7(11)       |
| C8   | 4650(4)   | 5811(2)    | 2817(3)   | 14.9(10)       |
| C9   | 3803(4)   | 5529(2)    | 1983(3)   | 19.5(11)       |
| C10  | 2734(4)   | 5644(2)    | 1774(4)   | 22.3(11)       |
| C11  | 2493(4)   | 6034(2)    | 2389(4)   | 23.8(12)       |

|     |          |            |         |          |
|-----|----------|------------|---------|----------|
| C12 | 3317(4)  | 6314(2)    | 3215(4) | 19.3(11) |
| C13 | 4395(4)  | 6205(2)    | 3432(3) | 16.9(10) |
| C14 | 6801(3)  | 5620(2)    | 4393(3) | 13.0(9)  |
| C15 | 6361(4)  | 5294(2)    | 4929(3) | 16.3(10) |
| C16 | 6933(4)  | 5242(2)    | 5961(3) | 18.6(10) |
| C17 | 7954(4)  | 5524(2)    | 6457(3) | 22.0(11) |
| C18 | 8403(4)  | 5851(2)    | 5939(3) | 21.8(11) |
| C19 | 7825(4)  | 5906(2)    | 4910(3) | 16.0(10) |
| C20 | 8119(4)  | 5921(2)    | 1182(3) | 14.1(10) |
| C21 | 7116(4)  | 5996(2)    | 340(3)  | 18.4(10) |
| C22 | 7041(4)  | 5992(2)    | -604(3) | 21.4(11) |
| C23 | 7964(4)  | 5920(2)    | -732(4) | 23.9(11) |
| C24 | 8971(4)  | 5842(2)    | 97(4)   | 24.5(11) |
| C25 | 9040(4)  | 5838(2)    | 1041(3) | 18.1(10) |
| C26 | 9503(4)  | 6237(2)    | 3272(3) | 14.2(10) |
| C27 | 9617(4)  | 6870(2)    | 3618(3) | 15.8(10) |
| C28 | 10632(4) | 7127(2)    | 4219(3) | 20.6(11) |
| C29 | 11555(4) | 6757(2)    | 4489(3) | 21.6(11) |
| C30 | 11456(4) | 6122(2)    | 4174(3) | 19.3(10) |
| C31 | 10441(4) | 5863(2)    | 3573(3) | 16.1(10) |
| C32 | 6003(3)  | 4903(2)    | 2552(3) | 13.3(10) |
| C33 | 5803(3)  | 4768(2)    | 1551(3) | 17.2(10) |
| C34 | 5822(4)  | 4092(2)    | 1437(4) | 22.1(11) |
| C35 | 6022(4)  | 3803(2)    | 2361(4) | 19.6(11) |
| C36 | 6124(3)  | 4298(2)    | 3046(3) | 15.4(10) |
| C37 | 8441(3)  | 5046(2)    | 2702(3) | 15.4(10) |
| C38 | 8385(4)  | 4545(2)    | 2031(4) | 20.4(11) |
| C39 | 8569(4)  | 3948(2)    | 2541(3) | 18.7(11) |
| C40 | 8771(4)  | 4070(2)    | 3538(4) | 18.3(10) |
| C41 | 8697(3)  | 4748(2)    | 3644(3) | 16.0(10) |
| O1  | 5440(3)  | 3221.8(17) | 4307(3) | 36.8(9)  |
| C42 | 5544(4)  | 2550(2)    | 4181(4) | 30.4(13) |
| C43 | 4461(4)  | 2303(2)    | 3413(4) | 27.2(12) |
| C44 | 3889(4)  | 2910(3)    | 2872(4) | 33.9(13) |
| C45 | 4324(5)  | 3401(3)    | 3699(4) | 35.8(14) |

**Table S17.** Anisotropic Displacement Parameters ( $\text{\AA}^2 \times 10^3$ ) for **4**. The Anisotropic displacement factor exponent takes the form:  $-2\pi^2[h^2a^{*2}U_{11}+2hka^*b^*U_{12}+\dots]$ .

| Atom | U <sub>11</sub> | U <sub>22</sub> | U <sub>33</sub> | U <sub>23</sub> | U <sub>13</sub> | U <sub>12</sub> |
|------|-----------------|-----------------|-----------------|-----------------|-----------------|-----------------|
| Br1  | 20.3(3)         | 13.8(2)         | 20.4(2)         | 3.8(2)          | 10.9(2)         | 0.9(2)          |
| Ni1  | 13.3(3)         | 11.5(3)         | 15.0(3)         | 1.1(2)          | 7.6(2)          | 0.7(2)          |
| Fe1  | 15.1(3)         | 12.0(3)         | 17.0(3)         | -1.6(3)         | 8.5(3)          | -0.1(3)         |

|     |          |          |          |          |          |          |
|-----|----------|----------|----------|----------|----------|----------|
| P1  | 13.7(6)  | 11.5(6)  | 13.2(6)  | 0.2(5)   | 6.5(5)   | 0.4(5)   |
| P2  | 15.5(6)  | 11.8(6)  | 14.2(6)  | 0.2(5)   | 7.0(5)   | 0.1(5)   |
| F1  | 27.4(16) | 31.3(17) | 20.4(15) | -3.5(13) | 7.9(13)  | 3.1(13)  |
| F2  | 28.7(17) | 43.9(19) | 26.3(16) | 14.8(14) | 10.2(13) | 0.0(14)  |
| F3  | 14.3(15) | 45.3(19) | 27.2(16) | 8.1(14)  | 5.8(12)  | 1.4(13)  |
| C1  | 21(3)    | 11(2)    | 22(3)    | 2(2)     | 14(2)    | -1(2)    |
| C2  | 25(3)    | 15(2)    | 29(3)    | 5(2)     | 20(2)    | 0(2)     |
| C3  | 22(3)    | 23(3)    | 33(3)    | 13(2)    | 16(2)    | 6(2)     |
| C4  | 39(3)    | 18(3)    | 39(3)    | 3(2)     | 29(3)    | 7(2)     |
| C5  | 35(3)    | 20(3)    | 25(3)    | -2(2)    | 23(2)    | 0(2)     |
| C6  | 25(3)    | 14(2)    | 23(3)    | 2(2)     | 14(2)    | -1(2)    |
| C7  | 21(3)    | 27(3)    | 23(3)    | 5(2)     | 10(2)    | 4(2)     |
| C8  | 20(3)    | 11(2)    | 16(2)    | 2.3(19)  | 10(2)    | 0.4(19)  |
| C9  | 22(3)    | 20(3)    | 19(3)    | 3(2)     | 11(2)    | 1(2)     |
| C10 | 16(3)    | 22(3)    | 25(3)    | 2(2)     | 6(2)     | -1(2)    |
| C11 | 16(3)    | 21(3)    | 37(3)    | 13(2)    | 15(2)    | 6(2)     |
| C12 | 26(3)    | 9(2)     | 34(3)    | 4(2)     | 23(2)    | 4(2)     |
| C13 | 19(2)    | 11(2)    | 20(2)    | 2.0(19)  | 8(2)     | -4(2)    |
| C14 | 15(2)    | 9(2)     | 14(2)    | -0.8(18) | 6.2(19)  | 5.2(19)  |
| C15 | 19(2)    | 15(2)    | 16(2)    | -1(2)    | 9(2)     | -1(2)    |
| C16 | 27(3)    | 12(2)    | 20(3)    | 5(2)     | 14(2)    | 5(2)     |
| C17 | 26(3)    | 25(3)    | 14(2)    | 1(2)     | 8(2)     | 12(2)    |
| C18 | 15(3)    | 22(3)    | 23(3)    | -5(2)    | 4(2)     | 3(2)     |
| C19 | 18(2)    | 11(2)    | 22(3)    | 0(2)     | 12(2)    | 4(2)     |
| C20 | 19(2)    | 10(2)    | 10(2)    | 0.6(18)  | 3.9(19)  | -1.8(19) |
| C21 | 25(3)    | 16(2)    | 20(3)    | -2(2)    | 14(2)    | 2(2)     |
| C22 | 21(3)    | 21(3)    | 16(3)    | 2(2)     | 3(2)     | -2(2)    |
| C23 | 38(3)    | 21(3)    | 17(3)    | -4(2)    | 15(2)    | -13(2)   |
| C24 | 28(3)    | 23(3)    | 31(3)    | -5(2)    | 20(2)    | -4(2)    |
| C25 | 21(3)    | 17(2)    | 17(2)    | -1(2)    | 9(2)     | -1(2)    |
| C26 | 17(2)    | 12(2)    | 16(2)    | 0.7(18)  | 9(2)     | -3.7(19) |
| C27 | 16(2)    | 16(2)    | 13(2)    | 2.2(19)  | 4(2)     | 3(2)     |
| C28 | 25(3)    | 16(2)    | 21(3)    | -2(2)    | 10(2)    | -5(2)    |
| C29 | 16(3)    | 31(3)    | 18(2)    | -5(2)    | 8(2)     | -9(2)    |
| C30 | 19(3)    | 23(3)    | 18(3)    | 1(2)     | 11(2)    | 3(2)     |
| C31 | 21(3)    | 15(2)    | 14(2)    | 0.4(19)  | 10(2)    | -1(2)    |
| C32 | 9(2)     | 12(2)    | 18(2)    | -0.8(19) | 5.2(19)  | -0.6(18) |
| C33 | 11(2)    | 22(3)    | 15(2)    | -1(2)    | 2.9(19)  | 1(2)     |
| C34 | 21(3)    | 23(3)    | 24(3)    | -9(2)    | 11(2)    | 0(2)     |
| C35 | 17(3)    | 14(2)    | 32(3)    | -4(2)    | 15(2)    | -4(2)    |
| C36 | 13(2)    | 14(2)    | 21(2)    | 2(2)     | 9(2)     | 2.9(19)  |
| C37 | 13(2)    | 14(2)    | 24(3)    | 0(2)     | 12(2)    | -3.0(19) |

|     |       |       |       |          |          |          |
|-----|-------|-------|-------|----------|----------|----------|
| C38 | 23(3) | 22(3) | 23(3) | -4(2)    | 17(2)    | -3(2)    |
| C39 | 23(3) | 8(2)  | 29(3) | -1(2)    | 15(2)    | 3(2)     |
| C40 | 13(2) | 17(2) | 26(3) | 2(2)     | 11(2)    | 1(2)     |
| C41 | 13(2) | 16(2) | 20(3) | -2(2)    | 10(2)    | -1(2)    |
| O1  | 45(2) | 24(2) | 38(2) | -7.7(17) | 15.6(19) | -8.5(18) |
| C42 | 26(3) | 27(3) | 37(3) | -1(2)    | 14(3)    | -3(2)    |
| C43 | 35(3) | 24(3) | 26(3) | -3(2)    | 17(2)    | -6(2)    |
| C44 | 28(3) | 40(3) | 35(3) | 2(3)     | 16(3)    | -4(3)    |
| C45 | 42(4) | 25(3) | 50(4) | -1(3)    | 29(3)    | 7(3)     |

**Table S18.** Bond Lengths for **4**.

| Atom | Atom | Length/Å   | Atom | Atom | Length/Å |
|------|------|------------|------|------|----------|
| Br1  | Ni1  | 2.3074(7)  | C12  | C13  | 1.374(6) |
| Ni1  | P1   | 2.1497(12) | C14  | C15  | 1.371(6) |
| Ni1  | P2   | 2.2561(13) | C14  | C19  | 1.384(6) |
| Ni1  | C1   | 1.898(4)   | C15  | C16  | 1.375(6) |
| Fe1  | C32  | 1.987(4)   | C16  | C17  | 1.374(6) |
| Fe1  | C33  | 2.000(4)   | C17  | C18  | 1.359(6) |
| Fe1  | C34  | 2.024(5)   | C18  | C19  | 1.372(6) |
| Fe1  | C35  | 2.029(4)   | C20  | C21  | 1.383(6) |
| Fe1  | C36  | 2.018(4)   | C20  | C25  | 1.375(6) |
| Fe1  | C37  | 1.991(4)   | C21  | C22  | 1.360(6) |
| Fe1  | C38  | 2.018(4)   | C22  | C23  | 1.366(7) |
| Fe1  | C39  | 2.034(4)   | C23  | C24  | 1.378(7) |
| Fe1  | C40  | 2.044(5)   | C24  | C25  | 1.364(6) |
| Fe1  | C41  | 2.014(4)   | C26  | C27  | 1.380(6) |
| P1   | C8   | 1.817(4)   | C26  | C31  | 1.383(6) |
| P1   | C14  | 1.803(4)   | C27  | C28  | 1.369(6) |
| P1   | C32  | 1.790(4)   | C28  | C29  | 1.367(6) |
| P2   | C20  | 1.820(4)   | C29  | C30  | 1.370(6) |
| P2   | C26  | 1.822(4)   | C30  | C31  | 1.371(6) |
| P2   | C37  | 1.802(4)   | C32  | C33  | 1.413(6) |
| F1   | C7   | 1.335(5)   | C32  | C36  | 1.413(6) |
| F2   | C7   | 1.333(5)   | C33  | C34  | 1.400(6) |
| F3   | C7   | 1.335(5)   | C34  | C35  | 1.404(6) |
| C1   | C2   | 1.385(6)   | C35  | C36  | 1.401(6) |
| C1   | C6   | 1.407(6)   | C37  | C38  | 1.410(6) |
| C2   | C3   | 1.386(6)   | C37  | C41  | 1.420(6) |
| C2   | C7   | 1.470(7)   | C38  | C39  | 1.403(6) |
| C3   | C4   | 1.357(7)   | C39  | C40  | 1.402(6) |
| C4   | C5   | 1.375(7)   | C40  | C41  | 1.410(6) |
| C5   | C6   | 1.360(6)   | O1   | C42  | 1.407(6) |



|     |     |          |     |     |          |
|-----|-----|----------|-----|-----|----------|
| C8  | C9  | 1.382(6) | O1  | C45 | 1.423(6) |
| C8  | C13 | 1.379(6) | C42 | C43 | 1.489(7) |
| C9  | C10 | 1.368(6) | C43 | C44 | 1.497(7) |
| C10 | C11 | 1.363(7) | C44 | C45 | 1.488(7) |
| C11 | C12 | 1.361(7) |     |     |          |

**Table S19.** Bond Angles for **4**.

| <b>Atom</b> | <b>Atom</b> | <b>Atom</b> | <b>Angle/°</b> | <b>Atom</b> | <b>Atom</b> | <b>Atom</b> | <b>Angle/°</b> |
|-------------|-------------|-------------|----------------|-------------|-------------|-------------|----------------|
| P1          | Ni1         | Br1         | 168.27(4)      | F2          | C7          | F3          | 104.7(4)       |
| P1          | Ni1         | P2          | 101.33(5)      | F2          | C7          | C2          | 112.9(4)       |
| P2          | Ni1         | Br1         | 88.67(4)       | F3          | C7          | C2          | 112.7(4)       |
| C1          | Ni1         | Br1         | 85.46(13)      | C9          | C8          | P1          | 120.2(3)       |
| C1          | Ni1         | P1          | 85.94(13)      | C13         | C8          | P1          | 121.0(3)       |
| C1          | Ni1         | P2          | 166.93(14)     | C13         | C8          | C9          | 118.7(4)       |
| C32         | Fe1         | C33         | 41.50(17)      | C10         | C9          | C8          | 120.2(4)       |
| C32         | Fe1         | C34         | 69.30(18)      | C11         | C10         | C9          | 120.4(5)       |
| C32         | Fe1         | C35         | 69.05(18)      | C12         | C11         | C10         | 120.1(4)       |
| C32         | Fe1         | C36         | 41.31(17)      | C11         | C12         | C13         | 120.2(4)       |
| C32         | Fe1         | C37         | 109.41(18)     | C12         | C13         | C8          | 120.4(4)       |
| C32         | Fe1         | C38         | 138.16(18)     | C15         | C14         | P1          | 121.7(3)       |
| C32         | Fe1         | C39         | 178.47(18)     | C15         | C14         | C19         | 118.8(4)       |
| C32         | Fe1         | C40         | 139.73(18)     | C19         | C14         | P1          | 119.4(3)       |
| C32         | Fe1         | C41         | 110.79(18)     | C14         | C15         | C16         | 120.7(4)       |
| C33         | Fe1         | C34         | 40.71(18)      | C15         | C16         | C17         | 119.4(4)       |
| C33         | Fe1         | C35         | 68.48(19)      | C18         | C17         | C16         | 120.8(4)       |
| C33         | Fe1         | C36         | 69.02(18)      | C17         | C18         | C19         | 119.6(4)       |
| C33         | Fe1         | C38         | 110.27(19)     | C18         | C19         | C14         | 120.7(4)       |
| C33         | Fe1         | C39         | 138.51(18)     | C21         | C20         | P2          | 119.0(3)       |
| C33         | Fe1         | C40         | 178.42(19)     | C25         | C20         | P2          | 122.6(3)       |
| C33         | Fe1         | C41         | 139.13(18)     | C25         | C20         | C21         | 118.4(4)       |
| C34         | Fe1         | C35         | 40.55(19)      | C22         | C21         | C20         | 120.9(4)       |
| C34         | Fe1         | C39         | 111.64(19)     | C21         | C22         | C23         | 120.2(4)       |
| C34         | Fe1         | C40         | 139.50(19)     | C22         | C23         | C24         | 119.8(4)       |
| C35         | Fe1         | C39         | 112.46(18)     | C25         | C24         | C23         | 119.8(4)       |
| C35         | Fe1         | C40         | 112.65(19)     | C24         | C25         | C20         | 121.0(4)       |
| C36         | Fe1         | C34         | 68.52(18)      | C27         | C26         | P2          | 121.6(3)       |
| C36         | Fe1         | C35         | 40.51(17)      | C27         | C26         | C31         | 118.1(4)       |
| C36         | Fe1         | C38         | 179.3(2)       | C31         | C26         | P2          | 120.3(3)       |
| C36         | Fe1         | C39         | 140.02(18)     | C28         | C27         | C26         | 121.1(4)       |
| C36         | Fe1         | C40         | 112.56(18)     | C29         | C28         | C27         | 120.2(4)       |
| C37         | Fe1         | C33         | 109.63(19)     | C30         | C29         | C28         | 119.6(4)       |
| C37         | Fe1         | C34         | 138.10(19)     | C29         | C30         | C31         | 120.4(4)       |

|     |     |     |            |     |     |     |          |
|-----|-----|-----|------------|-----|-----|-----|----------|
| C37 | Fe1 | C35 | 178.09(19) | C30 | C31 | C26 | 120.6(4) |
| C37 | Fe1 | C36 | 138.94(18) | P1  | C32 | Fe1 | 125.5(2) |
| C37 | Fe1 | C38 | 41.18(18)  | C33 | C32 | Fe1 | 69.7(2)  |
| C37 | Fe1 | C39 | 69.07(18)  | C33 | C32 | P1  | 124.0(3) |
| C37 | Fe1 | C40 | 69.24(18)  | C33 | C32 | C36 | 107.3(4) |
| C37 | Fe1 | C41 | 41.52(18)  | C36 | C32 | Fe1 | 70.5(2)  |
| C38 | Fe1 | C34 | 110.94(19) | C36 | C32 | P1  | 128.7(3) |
| C38 | Fe1 | C35 | 139.33(18) | C32 | C33 | Fe1 | 68.8(2)  |
| C38 | Fe1 | C39 | 40.52(18)  | C34 | C33 | Fe1 | 70.6(3)  |
| C38 | Fe1 | C40 | 68.15(19)  | C34 | C33 | C32 | 108.4(4) |
| C39 | Fe1 | C40 | 40.22(17)  | C33 | C34 | Fe1 | 68.7(3)  |
| C41 | Fe1 | C34 | 179.6(2)   | C33 | C34 | C35 | 107.9(4) |
| C41 | Fe1 | C35 | 139.84(19) | C35 | C34 | Fe1 | 69.9(3)  |
| C41 | Fe1 | C36 | 111.81(18) | C34 | C35 | Fe1 | 69.6(3)  |
| C41 | Fe1 | C38 | 68.73(19)  | C36 | C35 | Fe1 | 69.3(3)  |
| C41 | Fe1 | C39 | 68.25(18)  | C36 | C35 | C34 | 108.4(4) |
| C41 | Fe1 | C40 | 40.65(17)  | C32 | C36 | Fe1 | 68.2(2)  |
| C8  | P1  | Ni1 | 117.82(14) | C35 | C36 | Fe1 | 70.2(3)  |
| C14 | P1  | Ni1 | 112.10(15) | C35 | C36 | C32 | 108.0(4) |
| C14 | P1  | C8  | 103.1(2)   | P2  | C37 | Fe1 | 121.9(2) |
| C32 | P1  | Ni1 | 116.30(15) | C38 | C37 | Fe1 | 70.4(3)  |
| C32 | P1  | C8  | 100.6(2)   | C38 | C37 | P2  | 127.5(4) |
| C32 | P1  | C14 | 105.2(2)   | C38 | C37 | C41 | 107.1(4) |
| C20 | P2  | Ni1 | 113.02(15) | C41 | C37 | Fe1 | 70.1(2)  |
| C20 | P2  | C26 | 104.8(2)   | C41 | C37 | P2  | 125.3(3) |
| C26 | P2  | Ni1 | 112.66(15) | C37 | C38 | Fe1 | 68.4(2)  |
| C37 | P2  | Ni1 | 124.63(14) | C39 | C38 | Fe1 | 70.4(3)  |
| C37 | P2  | C20 | 99.4(2)    | C39 | C38 | C37 | 108.4(4) |
| C37 | P2  | C26 | 99.8(2)    | C38 | C39 | Fe1 | 69.1(3)  |
| C2  | C1  | Ni1 | 127.8(4)   | C40 | C39 | Fe1 | 70.3(3)  |
| C2  | C1  | C6  | 115.9(4)   | C40 | C39 | C38 | 108.4(4) |
| C6  | C1  | Ni1 | 116.2(3)   | C39 | C40 | Fe1 | 69.5(3)  |
| C1  | C2  | C3  | 121.8(5)   | C39 | C40 | C41 | 107.7(4) |
| C1  | C2  | C7  | 122.4(4)   | C41 | C40 | Fe1 | 68.5(3)  |
| C3  | C2  | C7  | 115.8(4)   | C37 | C41 | Fe1 | 68.4(2)  |
| C4  | C3  | C2  | 120.5(5)   | C40 | C41 | Fe1 | 70.8(3)  |
| C3  | C4  | C5  | 119.2(5)   | C40 | C41 | C37 | 108.3(4) |
| C6  | C5  | C4  | 120.8(5)   | C42 | O1  | C45 | 108.2(4) |
| C5  | C6  | C1  | 121.8(5)   | O1  | C42 | C43 | 108.1(4) |
| F1  | C7  | F3  | 105.4(4)   | C42 | C43 | C44 | 102.9(4) |
| F1  | C7  | C2  | 114.4(4)   | C45 | C44 | C43 | 101.8(4) |
| F2  | C7  | F1  | 105.9(4)   | O1  | C45 | C44 | 105.2(4) |

*X-ray Diffraction Data for (dppf)Ni(2-methoxyphenyl)(Br) (5)*

Crystals suitable for X-ray diffraction were grown from a concentrated solution of **5** in THF layered with pentane at -15 °C. Low-temperature diffraction data ( $\omega$ -scans) were collected on a Rigaku SCX Mini diffractometer coupled to a Rigaku Mercury275R CCD with Mo K $\alpha$  radiation ( $\lambda = 0.71073$  Å) for the structure of **5**. The diffraction images were processed and scaled using Rigaku Oxford Diffraction software.<sup>10</sup> The structure was solved with SHELXT and was refined against  $F^2$  on all data by full-matrix least squares with SHELXL.<sup>11</sup> All non-hydrogen atoms were refined anisotropically. Hydrogen atoms were included in the model at geometrically calculated positions and refined using a riding model. The isotropic displacement parameters of all hydrogen atoms were fixed to 1.2 times the U value of the atoms to which they are linked (1.5 times for methyl groups). The overall data quality was poor. The model reported here is intended to establish the atom connectivity of the target complex. The thermal parameters of each molecular model were globally restrained to behave as rigid bodies. Each cyclopentadienyl group and two aryl groups were constrained to have identical thermal parameters. The oxygen atoms of the THF groups are disordered over two positions with constrained occupancy distributions of 0.6/0.4. The full numbering scheme of compound **5** can be found in the full details of the X-ray structure determination (CIF), which is included as Supporting Information. CCDC number 1860571 contains the supplementary crystallographic data for this paper. These data can be obtained free of charge from The Cambridge Crystallographic Data Center via [www.ccdc.cam.ac.uk/data\\_request/cif](http://www.ccdc.cam.ac.uk/data_request/cif).

**Table S20.** Crystal data and structure refinement for **5**.

|                       |                                                                     |
|-----------------------|---------------------------------------------------------------------|
| Empirical formula     | C <sub>45</sub> H <sub>43</sub> BrFeNiO <sub>2</sub> P <sub>2</sub> |
| Formula weight        | 872.20                                                              |
| Temperature/K         | 93(2)                                                               |
| Crystal system        | triclinic                                                           |
| Space group           | P-1                                                                 |
| a/Å                   | 10.6336(9)                                                          |
| b/Å                   | 14.7133(14)                                                         |
| c/Å                   | 24.133(2)                                                           |
| $\alpha$ /°           | 82.664(8)                                                           |
| $\beta$ /°            | 84.682(8)                                                           |
| $\gamma$ /°           | 89.874(7)                                                           |
| Volume/Å <sup>3</sup> | 3728.5(6)                                                           |

|                                                |                                                               |
|------------------------------------------------|---------------------------------------------------------------|
| Z                                              | 4                                                             |
| $\rho_{\text{calc}}/\text{cm}^3$               | 1.554                                                         |
| $\mu/\text{mm}^{-1}$                           | 2.091                                                         |
| F(000)                                         | 1792.0                                                        |
| Crystal size/ $\text{mm}^3$                    | $0.200 \times 0.200 \times 0.100$                             |
| Radiation                                      | MoK $\alpha$ ( $\lambda = 0.71073$ )                          |
| 2 $\Theta$ range for data collection/ $^\circ$ | 3.846 to 41.63                                                |
| Index ranges                                   | $-10 \leq h \leq 10, -14 \leq k \leq 14, -24 \leq l \leq 24$  |
| Reflections collected                          | 33581                                                         |
| Independent reflections                        | 7802 [ $R_{\text{int}} = 0.2421, R_{\text{sigma}} = 0.1944$ ] |
| Data/restraints/parameters                     | 7802/1068/801                                                 |
| Goodness-of-fit on $F^2$                       | 1.057                                                         |
| Final R indexes [ $I \geq 2\sigma(I)$ ]        | $R_1 = 0.0932, wR_2 = 0.1852$                                 |
| Final R indexes [all data]                     | $R_1 = 0.1777, wR_2 = 0.2268$                                 |

**Table S21.** Fractional Atomic Coordinates ( $\times 10^4$ ) and Equivalent Isotropic Displacement Parameters ( $\text{\AA}^2 \times 10^3$ ) for **5**.  $U_{\text{eq}}$  is defined as 1/3 of the trace of the orthogonalised  $U_{\text{II}}$  tensor.

| Atom | x           | y          | z          | U(eq)    |
|------|-------------|------------|------------|----------|
| Br1  | 10815.7(16) | 8060.7(12) | 8053.1(8)  | 31.8(6)  |
| Ni1  | 9138.6(19)  | 8841.7(15) | 7661.9(10) | 25.8(6)  |
| Fe1  | 5287(2)     | 9094.5(17) | 8183.7(11) | 27.4(7)  |
| P1   | 7716(4)     | 9519(3)    | 7183(2)    | 24.8(12) |
| P2   | 8248(4)     | 8929(3)    | 8547(2)    | 28.6(12) |
| O1   | 8829(11)    | 7518(8)    | 6909(5)    | 39(3)    |
| C1   | 10060(15)   | 8799(12)   | 6955(8)    | 32(3)    |
| C2   | 9787(17)    | 8098(12)   | 6658(8)    | 35(4)    |
| C3   | 10398(17)   | 7989(13)   | 6128(8)    | 43(5)    |
| C4   | 11305(18)   | 8609(13)   | 5902(9)    | 48(5)    |
| C5   | 11657(17)   | 9328(13)   | 6197(8)    | 44(5)    |
| C6   | 11014(15)   | 9405(12)   | 6726(8)    | 33(4)    |
| C7   | 8454(17)    | 6791(12)   | 6610(8)    | 43(5)    |
| C8   | 6136(15)    | 9110(11)   | 7406(7)    | 26.7(17) |
| C9   | 4939(14)    | 9534(11)   | 7374(7)    | 26.7(17) |
| C10  | 4024(15)    | 8951(11)   | 7620(7)    | 26.7(17) |
| C11  | 4587(14)    | 8066(11)   | 7777(7)    | 26.7(17) |
| C12  | 5882(15)    | 8184(11)   | 7633(7)    | 26.7(17) |
| C13  | 6581(15)    | 9237(11)   | 8721(8)    | 29.7(17) |
| C14  | 6042(15)    | 10122(11)  | 8540(7)    | 29.7(17) |
| C15  | 4757(15)    | 10003(11)  | 8714(7)    | 29.7(17) |
| C16  | 4446(16)    | 9155(11)   | 8991(7)    | 29.7(17) |
| C17  | 5579(15)    | 8644(12)   | 8994(7)    | 29.7(17) |

|     |            |            |            |          |
|-----|------------|------------|------------|----------|
| C18 | 7776(15)   | 9486(11)   | 6427(7)    | 24(3)    |
| C19 | 7105(16)   | 8834(11)   | 6209(7)    | 29(4)    |
| C20 | 7187(16)   | 8817(12)   | 5644(8)    | 33(4)    |
| C21 | 7944(16)   | 9410(11)   | 5268(8)    | 33(4)    |
| C22 | 8649(16)   | 10061(12)  | 5494(8)    | 34(4)    |
| C23 | 8542(15)   | 10085(11)  | 6053(8)    | 27(4)    |
| C24 | 7696(16)   | 10740(11)  | 7236(8)    | 30(4)    |
| C25 | 8559(16)   | 11105(11)  | 7537(8)    | 35(4)    |
| C26 | 8531(16)   | 12022(11)  | 7608(8)    | 35(5)    |
| C27 | 7660(17)   | 12597(12)  | 7364(9)    | 44(5)    |
| C28 | 6799(16)   | 12247(11)  | 7057(8)    | 35(4)    |
| C29 | 6855(16)   | 11342(11)  | 6979(8)    | 34(4)    |
| C30 | 8384(15)   | 7864(11)   | 8996(7)    | 22(3)    |
| C31 | 9227(16)   | 7773(12)   | 9417(7)    | 34(4)    |
| C32 | 9350(17)   | 6909(12)   | 9718(8)    | 37(5)    |
| C33 | 8647(17)   | 6172(12)   | 9618(8)    | 35(5)    |
| C34 | 7830(16)   | 6264(12)   | 9220(7)    | 32(4)    |
| C35 | 7727(15)   | 7099(11)   | 8894(7)    | 27(4)    |
| C36 | 9029(16)   | 9791(11)   | 8885(8)    | 32(4)    |
| C37 | 10235(15)  | 10092(10)  | 8688(7)    | 26(4)    |
| C38 | 10841(17)  | 10769(11)  | 8913(8)    | 35(4)    |
| C39 | 10241(17)  | 11155(12)  | 9348(8)    | 35(4)    |
| C40 | 9036(17)   | 10836(11)  | 9575(8)    | 32(4)    |
| C41 | 8485(17)   | 10169(12)  | 9344(8)    | 36(4)    |
| Br2 | 5775.7(16) | 5625.5(12) | 8099.5(8)  | 30.0(5)  |
| Ni2 | 4121.1(19) | 5023.1(14) | 7684.0(10) | 23.6(6)  |
| Fe2 | 265(2)     | 4537.3(16) | 8173.5(11) | 24.6(7)  |
| P3  | 2712(4)    | 4556(3)    | 7188(2)    | 21.5(11) |
| P4  | 3225(4)    | 4534(3)    | 8558(2)    | 23.9(12) |
| O2  | 3812(10)   | 6673(7)    | 6923(5)    | 36(3)    |
| C42 | 5055(14)   | 5392(11)   | 6982(8)    | 26(3)    |
| C43 | 4770(15)   | 6194(11)   | 6679(8)    | 28(4)    |
| C44 | 5393(17)   | 6475(13)   | 6149(8)    | 38(4)    |
| C45 | 6318(17)   | 5985(13)   | 5940(9)    | 45(5)    |
| C46 | 6664(16)   | 5158(13)   | 6229(8)    | 38(4)    |
| C47 | 6026(14)   | 4863(12)   | 6746(8)    | 29(4)    |
| C48 | 3437(16)   | 7509(11)   | 6617(8)    | 39(5)    |
| C49 | 1115(14)   | 4882(11)   | 7409(7)    | 23.3(16) |
| C50 | 853(14)    | 5685(11)   | 7651(7)    | 23.3(16) |
| C51 | -470(14)   | 5732(11)   | 7781(7)    | 23.3(16) |
| C52 | -1000(15)  | 4972(10)   | 7617(7)    | 23.3(16) |
| C53 | -53(14)    | 4434(11)   | 7373(7)    | 23.3(16) |

|     |          |          |          |          |
|-----|----------|----------|----------|----------|
| C54 | 1562(14) | 4158(11) | 8711(7)  | 25.1(16) |
| C55 | 571(14)  | 4650(11) | 8984(7)  | 25.1(16) |
| C56 | -566(15) | 4167(10) | 8971(7)  | 25.1(16) |
| C57 | -273(14) | 3393(11) | 8696(7)  | 25.1(16) |
| C58 | 1048(14) | 3362(11) | 8544(7)  | 25.1(16) |
| C59 | 2771(15) | 4900(11) | 6437(7)  | 26(3)    |
| C60 | 2119(15) | 5660(11) | 6215(7)  | 26(4)    |
| C61 | 2197(18) | 5946(13) | 5640(8)  | 45(5)    |
| C62 | 2975(16) | 5452(13) | 5291(8)  | 40(5)    |
| C63 | 3652(16) | 4720(12) | 5508(8)  | 34(4)    |
| C64 | 3568(16) | 4442(12) | 6069(8)  | 31(4)    |
| C65 | 2718(14) | 3313(11) | 7236(7)  | 20(3)    |
| C66 | 3580(15) | 2838(11) | 7543(7)  | 26(4)    |
| C67 | 3549(16) | 1876(12) | 7613(8)  | 35(4)    |
| C68 | 2682(16) | 1421(13) | 7377(8)  | 37(5)    |
| C69 | 1836(16) | 1871(12) | 7062(8)  | 34(4)    |
| C70 | 1868(14) | 2830(11) | 6961(7)  | 23(4)    |
| C71 | 3258(15) | 5405(11) | 9019(8)  | 27.7(19) |
| C72 | 2788(14) | 6269(11) | 8858(8)  | 27.7(19) |
| C73 | 2701(14) | 6934(12) | 9209(8)  | 27.7(19) |
| C74 | 3104(14) | 6774(12) | 9717(8)  | 27.7(19) |
| C75 | 3543(14) | 5935(11) | 9919(8)  | 27.7(19) |
| C76 | 3615(14) | 5261(12) | 9568(7)  | 27.7(19) |
| C77 | 4036(15) | 3517(11) | 8896(8)  | 28.2(19) |
| C78 | 5253(15) | 3339(11) | 8694(8)  | 28.2(19) |
| C79 | 5812(15) | 2517(11) | 8939(7)  | 28.2(19) |
| C80 | 5191(15) | 1955(11) | 9364(7)  | 28.2(19) |
| C81 | 4003(15) | 2164(11) | 9549(8)  | 28.2(19) |
| C82 | 3431(16) | 2955(11) | 9315(7)  | 28.2(19) |
| O3  | 5570(30) | 8940(18) | 3900(13) | 85(7)    |
| O4  | 6370(30) | 8680(20) | 4304(18) | 69(9)    |
| C83 | 5080(20) | 9236(14) | 4385(10) | 60(5)    |
| C84 | 4226(19) | 8515(13) | 4700(9)  | 59(5)    |
| C85 | 4730(20) | 7639(14) | 4513(10) | 74(7)    |
| C86 | 5840(20) | 7956(16) | 4134(12) | 88(7)    |
| O5  | 570(20)  | 6552(16) | 3897(12) | 71(6)    |
| O6  | 1360(40) | 6610(30) | 4258(18) | 75(10)   |
| C87 | 870(20)  | 7433(16) | 4152(12) | 94(7)    |
| C88 | -240(20) | 7583(16) | 4506(12) | 96(8)    |
| C89 | -760(20) | 6646(14) | 4690(11) | 73(6)    |
| C90 | 80(20)   | 6025(15) | 4370(10) | 68(6)    |

**Table S22.** Anisotropic Displacement Parameters ( $\text{\AA}^2 \times 10^3$ ) for **5**. The Anisotropic displacement factor exponent takes the form:  $-2\pi^2[h^2a^{*2}U_{11}+2hka^*b^*U_{12}+\dots]$ .

| Atom | U <sub>11</sub> | U <sub>22</sub> | U <sub>33</sub> | U <sub>23</sub> | U <sub>13</sub> | U <sub>12</sub> |
|------|-----------------|-----------------|-----------------|-----------------|-----------------|-----------------|
| Br1  | 12.7(11)        | 33.8(12)        | 48.1(14)        | 0.0(10)         | -5.4(9)         | 4.4(8)          |
| Ni1  | 9.6(13)         | 26.7(14)        | 40.3(16)        | -1.2(11)        | -3.0(11)        | 0.3(10)         |
| Fe1  | 10.5(14)        | 29.7(16)        | 41.9(18)        | -5.7(13)        | 0.3(12)         | -1.3(11)        |
| P1   | 9(2)            | 22(3)           | 42(3)           | -3(2)           | 0(2)            | -0.9(19)        |
| P2   | 17(3)           | 23(3)           | 46(3)           | -2(2)           | -3(2)           | -3(2)           |
| O1   | 26(7)           | 44(7)           | 47(7)           | -10(5)          | -3(5)           | -5(5)           |
| C1   | 9(6)            | 38(7)           | 47(6)           | -1(5)           | -4(5)           | 7(5)            |
| C2   | 22(8)           | 36(7)           | 46(7)           | -1(6)           | -7(6)           | 2(6)            |
| C3   | 30(9)           | 50(9)           | 46(8)           | 1(6)            | -3(6)           | 10(7)           |
| C4   | 35(10)          | 55(10)          | 51(9)           | 4(7)            | 2(7)            | 6(7)            |
| C5   | 19(9)           | 54(10)          | 54(9)           | 5(7)            | 3(7)            | 7(7)            |
| C6   | 9(7)            | 40(8)           | 48(8)           | 6(6)            | -6(6)           | 3(6)            |
| C7   | 34(11)          | 46(9)           | 50(12)          | -10(8)          | -8(9)           | -6(8)           |
| C8   | 11(3)           | 26(4)           | 43(3)           | -6(3)           | 1(3)            | -4(3)           |
| C9   | 11(3)           | 26(4)           | 43(3)           | -6(3)           | 1(3)            | -4(3)           |
| C10  | 11(3)           | 26(4)           | 43(3)           | -6(3)           | 1(3)            | -4(3)           |
| C11  | 11(3)           | 26(4)           | 43(3)           | -6(3)           | 1(3)            | -4(3)           |
| C12  | 11(3)           | 26(4)           | 43(3)           | -6(3)           | 1(3)            | -4(3)           |
| C13  | 17(3)           | 27(4)           | 44(3)           | -6(3)           | 2(3)            | -3(3)           |
| C14  | 17(3)           | 27(4)           | 44(3)           | -6(3)           | 2(3)            | -3(3)           |
| C15  | 17(3)           | 27(4)           | 44(3)           | -6(3)           | 2(3)            | -3(3)           |
| C16  | 17(3)           | 27(4)           | 44(3)           | -6(3)           | 2(3)            | -3(3)           |
| C17  | 17(3)           | 27(4)           | 44(3)           | -6(3)           | 2(3)            | -3(3)           |
| C18  | 10(7)           | 22(7)           | 42(5)           | -5(4)           | 0(4)            | 5(5)            |
| C19  | 26(9)           | 27(8)           | 34(7)           | -2(6)           | -5(6)           | -5(7)           |
| C20  | 33(10)          | 33(9)           | 34(7)           | 1(6)            | -7(6)           | -4(7)           |
| C21  | 26(10)          | 34(9)           | 37(8)           | 4(6)            | -6(6)           | 4(7)            |
| C22  | 22(9)           | 37(9)           | 41(7)           | -3(6)           | -1(6)           | 4(7)            |
| C23  | 12(8)           | 27(8)           | 42(6)           | -1(6)           | -4(6)           | 1(6)            |
| C24  | 19(8)           | 17(5)           | 53(9)           | -3(5)           | 2(7)            | 0(4)            |
| C25  | 26(8)           | 22(6)           | 55(11)          | -1(6)           | -2(8)           | -2(5)           |
| C26  | 18(8)           | 22(6)           | 64(12)          | -7(7)           | 3(8)            | 2(5)            |
| C27  | 25(9)           | 22(7)           | 85(13)          | -9(7)           | -8(9)           | 6(6)            |
| C28  | 15(8)           | 21(6)           | 67(12)          | -1(6)           | 7(8)            | -2(6)           |
| C29  | 18(8)           | 24(6)           | 57(11)          | 2(6)            | 3(8)            | 0(5)            |
| C30  | 13(7)           | 22(5)           | 28(7)           | -4(5)           | 8(5)            | 0(4)            |
| C31  | 31(9)           | 31(7)           | 41(9)           | -5(6)           | -6(7)           | 2(6)            |
| C32  | 31(9)           | 32(7)           | 47(10)          | -1(6)           | -8(8)           | 2(6)            |
| C33  | 35(10)          | 29(7)           | 41(10)          | 0(6)            | -4(8)           | 0(6)            |

|     |          |          |          |          |          |          |
|-----|----------|----------|----------|----------|----------|----------|
| C34 | 28(9)    | 27(7)    | 38(10)   | 2(6)     | 2(7)     | 1(6)     |
| C35 | 23(9)    | 23(6)    | 35(9)    | -4(5)    | 0(7)     | 0(5)     |
| C36 | 27(6)    | 24(7)    | 46(8)    | 1(6)     | -7(5)    | -6(5)    |
| C37 | 25(7)    | 8(7)     | 43(9)    | 12(6)    | -10(6)   | 0(5)     |
| C38 | 27(8)    | 20(8)    | 57(10)   | 0(7)     | -6(7)    | -5(6)    |
| C39 | 32(8)    | 20(8)    | 54(10)   | 1(7)     | -11(7)   | 1(6)     |
| C40 | 33(8)    | 24(8)    | 40(9)    | 0(7)     | -15(7)   | -3(6)    |
| C41 | 34(8)    | 27(9)    | 47(9)    | -2(7)    | -4(7)    | -11(6)   |
| Br2 | 10.9(10) | 30.1(11) | 49.8(14) | -7.1(10) | -3.8(9)  | -3.5(8)  |
| Ni2 | 5.7(12)  | 23.9(13) | 40.8(16) | -4.2(11) | -0.4(11) | -2.3(10) |
| Fe2 | 6.2(14)  | 23.0(15) | 43.5(18) | -0.4(13) | -2.1(12) | 0.5(11)  |
| P3  | 5(2)     | 21(2)    | 39(3)    | -4(2)    | -2(2)    | -0.1(18) |
| P4  | 9(2)     | 23(3)    | 40(3)    | -4(2)    | 0(2)     | 0.7(19)  |
| O2  | 24(6)    | 29(6)    | 55(8)    | -4(5)    | -3(5)    | 5(5)     |
| C42 | 7(6)     | 25(6)    | 47(6)    | -7(4)    | -3(4)    | -8(4)    |
| C43 | 14(7)    | 26(6)    | 45(7)    | -8(5)    | -9(5)    | -6(5)    |
| C44 | 30(9)    | 37(8)    | 48(8)    | -7(6)    | -2(6)    | -9(6)    |
| C45 | 30(9)    | 45(9)    | 60(9)    | -9(7)    | 1(7)     | -9(7)    |
| C46 | 15(8)    | 45(9)    | 56(9)    | -15(6)   | -2(6)    | -8(7)    |
| C47 | 7(7)     | 28(7)    | 54(8)    | -14(6)   | -6(6)    | -6(6)    |
| C48 | 24(10)   | 34(8)    | 58(12)   | -2(7)    | -8(9)    | 2(7)     |
| C49 | 4(3)     | 24(3)    | 41(3)    | -2(3)    | 0(2)     | 3(2)     |
| C50 | 4(3)     | 24(3)    | 41(3)    | -2(3)    | 0(2)     | 3(2)     |
| C51 | 4(3)     | 24(3)    | 41(3)    | -2(3)    | 0(2)     | 3(2)     |
| C52 | 4(3)     | 24(3)    | 41(3)    | -2(3)    | 0(2)     | 3(2)     |
| C53 | 4(3)     | 24(3)    | 41(3)    | -2(3)    | 0(2)     | 3(2)     |
| C54 | 8(3)     | 23(3)    | 43(3)    | 0(3)     | -1(2)    | 3(2)     |
| C55 | 8(3)     | 23(3)    | 43(3)    | 0(3)     | -1(2)    | 3(2)     |
| C56 | 8(3)     | 23(3)    | 43(3)    | 0(3)     | -1(2)    | 3(2)     |
| C57 | 8(3)     | 23(3)    | 43(3)    | 0(3)     | -1(2)    | 3(2)     |
| C58 | 8(3)     | 23(3)    | 43(3)    | 0(3)     | -1(2)    | 3(2)     |
| C59 | 21(8)    | 17(7)    | 39(5)    | -4(4)    | 0(4)     | -9(5)    |
| C60 | 15(8)    | 17(7)    | 41(7)    | 4(5)     | 4(6)     | -11(6)   |
| C61 | 36(11)   | 49(9)    | 44(7)    | 7(6)     | 7(7)     | 1(8)     |
| C62 | 27(10)   | 49(10)   | 41(8)    | 4(6)     | 1(7)     | -4(7)    |
| C63 | 20(9)    | 42(9)    | 40(7)    | -6(6)    | -3(6)    | -11(7)   |
| C64 | 21(9)    | 33(8)    | 39(6)    | -6(6)    | -1(6)    | -3(7)    |
| C65 | 6(7)     | 24(5)    | 30(8)    | -4(4)    | 6(6)     | 1(4)     |
| C66 | 14(8)    | 33(6)    | 30(9)    | -5(6)    | 5(7)     | 5(5)     |
| C67 | 14(8)    | 33(7)    | 57(11)   | -5(6)    | 1(8)     | 4(5)     |
| C68 | 15(9)    | 33(7)    | 61(12)   | -3(7)    | 1(8)     | 1(6)     |
| C69 | 15(8)    | 29(6)    | 60(12)   | -9(6)    | -2(8)    | -1(5)    |



|     |        |        |         |         |        |        |
|-----|--------|--------|---------|---------|--------|--------|
| C70 | 8(7)   | 29(6)  | 33(9)   | -9(6)   | 6(7)   | 3(5)   |
| C71 | 8(4)   | 33(4)  | 45(5)   | -12(4)  | -5(3)  | -1(3)  |
| C72 | 8(4)   | 33(4)  | 45(5)   | -12(4)  | -5(3)  | -1(3)  |
| C73 | 8(4)   | 33(4)  | 45(5)   | -12(4)  | -5(3)  | -1(3)  |
| C74 | 8(4)   | 33(4)  | 45(5)   | -12(4)  | -5(3)  | -1(3)  |
| C75 | 8(4)   | 33(4)  | 45(5)   | -12(4)  | -5(3)  | -1(3)  |
| C76 | 8(4)   | 33(4)  | 45(5)   | -12(4)  | -5(3)  | -1(3)  |
| C77 | 13(4)  | 28(4)  | 43(5)   | -7(3)   | -3(3)  | 1(3)   |
| C78 | 13(4)  | 28(4)  | 43(5)   | -7(3)   | -3(3)  | 1(3)   |
| C79 | 13(4)  | 28(4)  | 43(5)   | -7(3)   | -3(3)  | 1(3)   |
| C80 | 13(4)  | 28(4)  | 43(5)   | -7(3)   | -3(3)  | 1(3)   |
| C81 | 13(4)  | 28(4)  | 43(5)   | -7(3)   | -3(3)  | 1(3)   |
| C82 | 13(4)  | 28(4)  | 43(5)   | -7(3)   | -3(3)  | 1(3)   |
| O3  | 94(17) | 60(10) | 99(13)  | -19(9)  | 16(11) | -3(10) |
| O4  | 55(11) | 39(11) | 110(20) | 5(12)   | 3(10)  | 18(8)  |
| C83 | 50(11) | 51(9)  | 80(13)  | -11(8)  | -12(9) | 14(7)  |
| C84 | 47(10) | 51(9)  | 80(13)  | -12(9)  | -11(9) | 13(7)  |
| C85 | 71(12) | 45(9)  | 103(16) | -11(8)  | 12(11) | 6(7)   |
| C86 | 80(12) | 60(9)  | 121(15) | -17(9)  | 25(11) | 1(8)   |
| O5  | 47(14) | 45(10) | 112(14) | 8(9)    | 7(10)  | 14(9)  |
| O6  | 57(11) | 52(11) | 110(30) | -21(12) | 10(11) | -18(9) |
| C87 | 71(12) | 55(9)  | 147(17) | -7(10)  | 32(11) | -12(8) |
| C88 | 71(13) | 59(10) | 152(19) | -18(10) | 28(13) | -13(8) |
| C89 | 45(11) | 66(10) | 107(15) | -14(10) | 3(10)  | -16(8) |
| C90 | 57(11) | 51(9)  | 94(15)  | -2(8)   | -6(10) | -11(8) |

**Table S23.** Bond Lengths for **5**.

| Atom | Atom | Length/Å  | Atom | Atom | Length/Å  |
|------|------|-----------|------|------|-----------|
| Br1  | Ni1  | 2.328(3)  | Fe2  | C57  | 2.019(16) |
| Ni1  | C1   | 1.896(18) | Fe2  | C52  | 2.033(16) |
| Ni1  | P1   | 2.155(5)  | Fe2  | C50  | 2.036(16) |
| Ni1  | P2   | 2.274(6)  | Fe2  | C55  | 2.040(18) |
| Fe1  | C8   | 2.004(17) | Fe2  | C56  | 2.049(17) |
| Fe1  | C13  | 2.004(18) | Fe2  | C58  | 2.054(16) |
| Fe1  | C15  | 2.011(17) | Fe2  | C51  | 2.075(16) |
| Fe1  | C10  | 2.027(17) | P3   | C59  | 1.814(18) |
| Fe1  | C14  | 2.033(17) | P3   | C49  | 1.814(16) |
| Fe1  | C17  | 2.035(18) | P3   | C65  | 1.818(16) |
| Fe1  | C9   | 2.046(18) | P4   | C71  | 1.803(17) |
| Fe1  | C12  | 2.063(17) | P4   | C54  | 1.844(16) |
| Fe1  | C16  | 2.079(17) | P4   | C77  | 1.860(17) |

|     |     |           |     |     |           |
|-----|-----|-----------|-----|-----|-----------|
| Fe1 | C11 | 2.080(16) | O2  | C43 | 1.369(19) |
| P1  | C8  | 1.798(16) | O2  | C48 | 1.428(19) |
| P1  | C24 | 1.817(16) | C42 | C43 | 1.36(2)   |
| P1  | C18 | 1.826(18) | C42 | C47 | 1.41(2)   |
| P2  | C30 | 1.801(17) | C43 | C44 | 1.40(2)   |
| P2  | C36 | 1.832(18) | C44 | C45 | 1.32(2)   |
| P2  | C13 | 1.853(17) | C45 | C46 | 1.39(2)   |
| O1  | C2  | 1.38(2)   | C46 | C47 | 1.38(2)   |
| O1  | C7  | 1.442(19) | C49 | C50 | 1.40(2)   |
| C1  | C2  | 1.37(2)   | C49 | C53 | 1.42(2)   |
| C1  | C6  | 1.38(2)   | C50 | C51 | 1.42(2)   |
| C2  | C3  | 1.41(2)   | C51 | C52 | 1.37(2)   |
| C3  | C4  | 1.36(2)   | C52 | C53 | 1.41(2)   |
| C4  | C5  | 1.42(3)   | C54 | C58 | 1.41(2)   |
| C5  | C6  | 1.41(2)   | C54 | C55 | 1.43(2)   |
| C8  | C12 | 1.42(2)   | C55 | C56 | 1.41(2)   |
| C8  | C9  | 1.42(2)   | C56 | C57 | 1.41(2)   |
| C9  | C10 | 1.34(2)   | C57 | C58 | 1.42(2)   |
| C10 | C11 | 1.45(2)   | C59 | C60 | 1.39(2)   |
| C11 | C12 | 1.39(2)   | C59 | C64 | 1.41(2)   |
| C13 | C17 | 1.43(2)   | C60 | C61 | 1.39(2)   |
| C13 | C14 | 1.45(2)   | C61 | C62 | 1.40(2)   |
| C14 | C15 | 1.40(2)   | C62 | C63 | 1.37(2)   |
| C15 | C16 | 1.36(2)   | C63 | C64 | 1.36(2)   |
| C16 | C17 | 1.42(2)   | C65 | C66 | 1.37(2)   |
| C18 | C19 | 1.38(2)   | C65 | C70 | 1.41(2)   |
| C18 | C23 | 1.39(2)   | C66 | C67 | 1.40(2)   |
| C19 | C20 | 1.36(2)   | C67 | C68 | 1.35(2)   |
| C20 | C21 | 1.38(2)   | C68 | C69 | 1.35(2)   |
| C21 | C22 | 1.41(2)   | C69 | C70 | 1.40(2)   |
| C22 | C23 | 1.35(2)   | C71 | C72 | 1.39(2)   |
| C24 | C25 | 1.37(2)   | C71 | C76 | 1.40(2)   |
| C24 | C29 | 1.39(2)   | C72 | C73 | 1.37(2)   |
| C25 | C26 | 1.38(2)   | C73 | C74 | 1.33(2)   |
| C26 | C27 | 1.38(2)   | C74 | C75 | 1.37(2)   |
| C27 | C28 | 1.37(2)   | C75 | C76 | 1.38(2)   |
| C28 | C29 | 1.37(2)   | C77 | C82 | 1.34(2)   |
| C30 | C35 | 1.39(2)   | C77 | C78 | 1.38(2)   |
| C30 | C31 | 1.41(2)   | C78 | C79 | 1.43(2)   |
| C31 | C32 | 1.39(2)   | C79 | C80 | 1.35(2)   |
| C32 | C33 | 1.38(2)   | C80 | C81 | 1.35(2)   |
| C33 | C34 | 1.35(2)   | C81 | C82 | 1.39(2)   |

|     |     |           |     |     |         |
|-----|-----|-----------|-----|-----|---------|
| C34 | C35 | 1.38(2)   | O3  | C83 | 1.36(3) |
| C36 | C37 | 1.38(2)   | O3  | C86 | 1.52(3) |
| C36 | C41 | 1.38(2)   | O4  | C86 | 1.33(4) |
| C37 | C38 | 1.38(2)   | O4  | C83 | 1.61(4) |
| C38 | C39 | 1.36(2)   | C83 | C84 | 1.48(3) |
| C39 | C40 | 1.40(2)   | C84 | C85 | 1.50(3) |
| C40 | C41 | 1.35(2)   | C85 | C86 | 1.46(3) |
| Br2 | Ni2 | 2.334(3)  | O5  | C90 | 1.36(3) |
| Ni2 | C42 | 1.898(17) | O5  | C87 | 1.55(3) |
| Ni2 | P3  | 2.167(5)  | O6  | C87 | 1.32(4) |
| Ni2 | P4  | 2.263(5)  | O6  | C90 | 1.59(4) |
| Fe2 | C49 | 1.983(17) | C87 | C88 | 1.43(3) |
| Fe2 | C54 | 2.010(17) | C88 | C89 | 1.48(3) |
| Fe2 | C53 | 2.018(17) | C89 | C90 | 1.51(3) |

**Table S24.** Bond Angles for **5**.

| Atom | Atom | Atom | Angle/°    | Atom | Atom | Atom | Angle/°  |
|------|------|------|------------|------|------|------|----------|
| C1   | Ni1  | P1   | 85.0(5)    | C54  | Fe2  | C53  | 139.1(6) |
| C1   | Ni1  | P2   | 173.4(6)   | C49  | Fe2  | C57  | 138.9(7) |
| P1   | Ni1  | P2   | 100.09(19) | C54  | Fe2  | C57  | 68.2(6)  |
| C1   | Ni1  | Br1  | 86.7(5)    | C53  | Fe2  | C57  | 112.1(7) |
| P1   | Ni1  | Br1  | 171.53(18) | C49  | Fe2  | C52  | 68.7(6)  |
| P2   | Ni1  | Br1  | 88.32(15)  | C54  | Fe2  | C52  | 177.5(7) |
| C8   | Fe1  | C13  | 109.8(7)   | C53  | Fe2  | C52  | 40.8(6)  |
| C8   | Fe1  | C15  | 137.9(7)   | C57  | Fe2  | C52  | 114.3(6) |
| C13  | Fe1  | C15  | 67.9(7)    | C49  | Fe2  | C50  | 40.7(6)  |
| C8   | Fe1  | C10  | 68.3(7)    | C54  | Fe2  | C50  | 110.4(7) |
| C13  | Fe1  | C10  | 178.1(7)   | C53  | Fe2  | C50  | 68.5(7)  |
| C15  | Fe1  | C10  | 113.5(7)   | C57  | Fe2  | C50  | 178.6(6) |
| C8   | Fe1  | C14  | 108.3(7)   | C52  | Fe2  | C50  | 67.0(6)  |
| C13  | Fe1  | C14  | 42.2(6)    | C49  | Fe2  | C55  | 138.6(6) |
| C15  | Fe1  | C14  | 40.4(6)    | C54  | Fe2  | C55  | 41.5(6)  |
| C10  | Fe1  | C14  | 138.0(7)   | C53  | Fe2  | C55  | 179.4(6) |
| C8   | Fe1  | C17  | 140.2(7)   | C57  | Fe2  | C55  | 68.0(7)  |
| C13  | Fe1  | C17  | 41.6(6)    | C52  | Fe2  | C55  | 138.6(6) |
| C15  | Fe1  | C17  | 66.9(7)    | C50  | Fe2  | C55  | 111.4(7) |
| C10  | Fe1  | C17  | 139.9(6)   | C49  | Fe2  | C56  | 178.4(7) |
| C14  | Fe1  | C17  | 70.2(7)    | C54  | Fe2  | C56  | 68.7(6)  |
| C8   | Fe1  | C9   | 41.0(6)    | C53  | Fe2  | C56  | 139.4(6) |
| C13  | Fe1  | C9   | 140.0(7)   | C57  | Fe2  | C56  | 40.5(6)  |
| C15  | Fe1  | C9   | 112.9(7)   | C52  | Fe2  | C56  | 112.9(6) |

|     |     |     |           |     |     |     |           |
|-----|-----|-----|-----------|-----|-----|-----|-----------|
| C10 | Fe1 | C9  | 38.5(6)   | C50 | Fe2 | C56 | 139.8(6)  |
| C14 | Fe1 | C9  | 110.9(7)  | C55 | Fe2 | C56 | 40.3(6)   |
| C17 | Fe1 | C9  | 178.3(6)  | C49 | Fe2 | C58 | 109.8(7)  |
| C8  | Fe1 | C12 | 40.8(6)   | C54 | Fe2 | C58 | 40.7(6)   |
| C13 | Fe1 | C12 | 111.0(7)  | C53 | Fe2 | C58 | 111.4(7)  |
| C15 | Fe1 | C12 | 178.2(6)  | C57 | Fe2 | C58 | 40.8(6)   |
| C10 | Fe1 | C12 | 67.6(7)   | C52 | Fe2 | C58 | 141.4(6)  |
| C14 | Fe1 | C12 | 137.9(6)  | C50 | Fe2 | C58 | 137.9(6)  |
| C17 | Fe1 | C12 | 113.3(7)  | C55 | Fe2 | C58 | 69.1(7)   |
| C9  | Fe1 | C12 | 66.9(7)   | C56 | Fe2 | C58 | 68.9(6)   |
| C8  | Fe1 | C16 | 176.7(7)  | C49 | Fe2 | C51 | 68.4(6)   |
| C13 | Fe1 | C16 | 68.6(7)   | C54 | Fe2 | C51 | 138.8(6)  |
| C15 | Fe1 | C16 | 38.9(6)   | C53 | Fe2 | C51 | 67.8(7)   |
| C10 | Fe1 | C16 | 113.2(7)  | C57 | Fe2 | C51 | 141.1(6)  |
| C14 | Fe1 | C16 | 68.5(7)   | C52 | Fe2 | C51 | 39.0(6)   |
| C17 | Fe1 | C16 | 40.4(6)   | C50 | Fe2 | C51 | 40.3(6)   |
| C9  | Fe1 | C16 | 138.5(7)  | C55 | Fe2 | C51 | 111.7(7)  |
| C12 | Fe1 | C16 | 142.3(6)  | C56 | Fe2 | C51 | 112.9(6)  |
| C8  | Fe1 | C11 | 68.3(6)   | C58 | Fe2 | C51 | 178.0(7)  |
| C13 | Fe1 | C11 | 138.2(7)  | C59 | P3  | C49 | 100.9(8)  |
| C15 | Fe1 | C11 | 142.4(6)  | C59 | P3  | C65 | 102.3(8)  |
| C10 | Fe1 | C11 | 41.4(6)   | C49 | P3  | C65 | 106.9(7)  |
| C14 | Fe1 | C11 | 176.6(7)  | C59 | P3  | Ni2 | 121.4(5)  |
| C17 | Fe1 | C11 | 112.3(7)  | C49 | P3  | Ni2 | 113.6(6)  |
| C9  | Fe1 | C11 | 66.7(7)   | C65 | P3  | Ni2 | 110.3(6)  |
| C12 | Fe1 | C11 | 39.3(6)   | C71 | P4  | C54 | 99.7(8)   |
| C16 | Fe1 | C11 | 114.9(7)  | C71 | P4  | C77 | 106.7(8)  |
| C8  | P1  | C24 | 105.8(8)  | C54 | P4  | C77 | 100.5(7)  |
| C8  | P1  | C18 | 101.1(8)  | C71 | P4  | Ni2 | 112.2(6)  |
| C24 | P1  | C18 | 102.9(8)  | C54 | P4  | Ni2 | 123.6(6)  |
| C8  | P1  | Ni1 | 114.1(6)  | C77 | P4  | Ni2 | 112.3(6)  |
| C24 | P1  | Ni1 | 111.0(6)  | C43 | O2  | C48 | 117.7(14) |
| C18 | P1  | Ni1 | 120.4(5)  | C43 | C42 | C47 | 117.2(17) |
| C30 | P2  | C36 | 105.4(8)  | C43 | C42 | Ni2 | 119.2(13) |
| C30 | P2  | C13 | 102.1(8)  | C47 | C42 | Ni2 | 123.5(14) |
| C36 | P2  | C13 | 99.3(8)   | C42 | C43 | O2  | 114.9(16) |
| C30 | P2  | Ni1 | 111.5(5)  | C42 | C43 | C44 | 121.3(17) |
| C36 | P2  | Ni1 | 112.2(6)  | O2  | C43 | C44 | 123.8(17) |
| C13 | P2  | Ni1 | 124.3(6)  | C45 | C44 | C43 | 121(2)    |
| C2  | O1  | C7  | 117.8(14) | C44 | C45 | C46 | 121(2)    |
| C2  | C1  | C6  | 117.8(18) | C47 | C46 | C45 | 118.5(18) |
| C2  | C1  | Ni1 | 117.7(14) | C46 | C47 | C42 | 121.2(18) |

|     |     |     |           |     |     |     |           |
|-----|-----|-----|-----------|-----|-----|-----|-----------|
| C6  | C1  | Ni1 | 124.4(15) | C50 | C49 | C53 | 108.0(14) |
| C1  | C2  | O1  | 114.8(17) | C50 | C49 | P3  | 122.3(12) |
| C1  | C2  | C3  | 123.5(18) | C53 | C49 | P3  | 129.7(13) |
| O1  | C2  | C3  | 121.7(17) | C50 | C49 | Fe2 | 71.7(10)  |
| C4  | C3  | C2  | 118(2)    | C53 | C49 | Fe2 | 70.5(9)   |
| C3  | C4  | C5  | 121(2)    | P3  | C49 | Fe2 | 124.1(9)  |
| C6  | C5  | C4  | 118.5(18) | C49 | C50 | C51 | 108.3(14) |
| C1  | C6  | C5  | 121.1(19) | C49 | C50 | Fe2 | 67.6(9)   |
| C12 | C8  | C9  | 105.9(14) | C51 | C50 | Fe2 | 71.3(9)   |
| C12 | C8  | P1  | 121.7(12) | C52 | C51 | C50 | 107.4(15) |
| C9  | C8  | P1  | 132.3(13) | C52 | C51 | Fe2 | 68.9(9)   |
| C12 | C8  | Fe1 | 71.8(10)  | C50 | C51 | Fe2 | 68.4(9)   |
| C9  | C8  | Fe1 | 71.1(10)  | C51 | C52 | C53 | 110.2(15) |
| P1  | C8  | Fe1 | 124.9(9)  | C51 | C52 | Fe2 | 72.2(10)  |
| C10 | C9  | C8  | 110.0(16) | C53 | C52 | Fe2 | 69.0(9)   |
| C10 | C9  | Fe1 | 70.0(11)  | C52 | C53 | C49 | 106.1(15) |
| C8  | C9  | Fe1 | 67.9(10)  | C52 | C53 | Fe2 | 70.2(10)  |
| C9  | C10 | C11 | 108.5(15) | C49 | C53 | Fe2 | 67.9(10)  |
| C9  | C10 | Fe1 | 71.5(10)  | C58 | C54 | C55 | 109.2(14) |
| C11 | C10 | Fe1 | 71.3(10)  | C58 | C54 | P4  | 124.9(12) |
| C12 | C11 | C10 | 106.0(15) | C55 | C54 | P4  | 125.9(12) |
| C12 | C11 | Fe1 | 69.7(9)   | C58 | C54 | Fe2 | 71.3(10)  |
| C10 | C11 | Fe1 | 67.3(9)   | C55 | C54 | Fe2 | 70.4(9)   |
| C11 | C12 | C8  | 109.2(15) | P4  | C54 | Fe2 | 121.4(9)  |
| C11 | C12 | Fe1 | 71.0(10)  | C56 | C55 | C54 | 107.4(15) |
| C8  | C12 | Fe1 | 67.4(10)  | C56 | C55 | Fe2 | 70.2(10)  |
| C17 | C13 | C14 | 108.1(14) | C54 | C55 | Fe2 | 68.1(10)  |
| C17 | C13 | P2  | 127.4(13) | C55 | C56 | C57 | 107.4(14) |
| C14 | C13 | P2  | 124.1(12) | C55 | C56 | Fe2 | 69.5(10)  |
| C17 | C13 | Fe1 | 70.3(10)  | C57 | C56 | Fe2 | 68.6(10)  |
| C14 | C13 | Fe1 | 70.0(10)  | C56 | C57 | C58 | 110.2(15) |
| P2  | C13 | Fe1 | 120.3(9)  | C56 | C57 | Fe2 | 70.9(10)  |
| C15 | C14 | C13 | 103.7(15) | C58 | C57 | Fe2 | 70.9(9)   |
| C15 | C14 | Fe1 | 68.9(10)  | C54 | C58 | C57 | 105.8(14) |
| C13 | C14 | Fe1 | 67.8(10)  | C54 | C58 | Fe2 | 68.0(9)   |
| C16 | C15 | C14 | 114.1(16) | C57 | C58 | Fe2 | 68.3(9)   |
| C16 | C15 | Fe1 | 73.2(10)  | C60 | C59 | C64 | 118.3(17) |
| C14 | C15 | Fe1 | 70.7(10)  | C60 | C59 | P3  | 121.4(13) |
| C15 | C16 | C17 | 106.5(15) | C64 | C59 | P3  | 120.1(14) |
| C15 | C16 | Fe1 | 67.8(10)  | C61 | C60 | C59 | 121.7(17) |
| C17 | C16 | Fe1 | 68.1(10)  | C60 | C61 | C62 | 117.8(19) |
| C16 | C17 | C13 | 107.5(15) | C63 | C62 | C61 | 121.0(19) |

|     |     |     |           |            |     |     |           |           |
|-----|-----|-----|-----------|------------|-----|-----|-----------|-----------|
| C16 | C17 | Fe1 | 71.5(10)  | C64        | C63 | C62 | 121.0(19) |           |
| C13 | C17 | Fe1 | 68.1(10)  | C63        | C64 | C59 | 120.3(18) |           |
| C19 | C18 | C23 | 117.6(17) | C66        | C65 | C70 | 119.5(15) |           |
| C19 | C18 | P1  | 121.1(13) | C66        | C65 | P3  | 118.6(13) |           |
| C23 | C18 | P1  | 121.2(13) | C70        | C65 | P3  | 121.9(12) |           |
| C20 | C19 | C18 | 119.7(17) | C65        | C66 | C67 | 119.4(16) |           |
| C19 | C20 | C21 | 123.3(18) | C68        | C67 | C66 | 120.6(17) |           |
| C20 | C21 | C22 | 116.7(18) | C67        | C68 | C69 | 121.4(18) |           |
| C23 | C22 | C21 | 119.7(18) | C68        | C69 | C70 | 120.1(17) |           |
| C22 | C23 | C18 | 123.1(17) | C69        | C70 | C65 | 118.7(16) |           |
| C25 | C24 | C29 | 117.0(16) | C72        | C71 | C76 | 115.0(16) |           |
| C25 | C24 | P1  | 119.5(13) | C72        | C71 | P4  | 119.7(14) |           |
| C29 | C24 | P1  | 123.5(14) | C76        | C71 | P4  | 124.9(13) |           |
| C24 | C25 | C26 | 121.0(17) | C73        | C72 | C71 | 122.1(18) |           |
| C27 | C26 | C25 | 120.6(18) | C74        | C73 | C72 | 120.4(18) |           |
| C28 | C27 | C26 | 119.2(17) | C73        | C74 | C75 | 121.6(18) |           |
| C29 | C28 | C27 | 119.5(18) | C74        | C75 | C76 | 117.9(18) |           |
| C28 | C29 | C24 | 122.4(18) | C75        | C76 | C71 | 122.9(17) |           |
| C35 | C30 | C31 | 119.3(16) | C82        | C77 | C78 | 120.8(17) |           |
| C35 | C30 | P2  | 119.2(13) | C82        | C77 | P4  | 120.4(13) |           |
| C31 | C30 | P2  | 121.3(13) | C78        | C77 | P4  | 118.7(14) |           |
| C32 | C31 | C30 | 117.9(17) | C77        | C78 | C79 | 117.0(16) |           |
| C33 | C32 | C31 | 121.2(18) | C80        | C79 | C78 | 121.6(16) |           |
| C34 | C33 | C32 | 120.8(18) | C81        | C80 | C79 | 119.1(17) |           |
| C33 | C34 | C35 | 119.8(18) | C80        | C81 | C82 | 120.6(17) |           |
| C34 | C35 | C30 | 121.0(17) | C77        | C82 | C81 | 120.9(16) |           |
| C37 | C36 | C41 | 115.9(17) | C83        | O3  | C86 | 98(2)     |           |
| C37 | C36 | P2  | 120.2(15) | C86        | O4  | C83 | 96(3)     |           |
| C41 | C36 | P2  | 123.8(14) | O3         | C83 | C84 | 109(2)    |           |
| C36 | C37 | C38 | 122.4(18) | C84        | C83 | O4  | 101(2)    |           |
| C39 | C38 | C37 | 119.5(18) | C83        | C84 | C85 | 104.3(18) |           |
| C38 | C39 | C40 | 119.5(18) | C86        | C85 | C84 | 102.5(18) |           |
| C41 | C40 | C39 | 118.8(18) | O4         | C86 | C85 | 111(3)    |           |
| C40 | C41 | C36 | 123.7(18) | C85        | C86 | O3  | 106(2)    |           |
| C42 | Ni2 | P3  | 85.1(5)   | C90        | O5  | C87 | 99(2)     |           |
| C42 | Ni2 | P4  | 173.4(5)  | C87        | O6  | C90 | 99(3)     |           |
|     | P3  | Ni2 | P4        | 100.08(19) | O6  | C87 | C88       | 114(3)    |
| C42 | Ni2 | Br2 | 87.1(5)   | C88        | C87 | O5  | 104(2)    |           |
|     | P3  | Ni2 | Br2       | 172.02(18) | C87 | C88 | C89       | 104(2)    |
|     | P4  | Ni2 | Br2       | 87.85(15)  | C88 | C89 | C90       | 104.9(19) |
| C49 | Fe2 | C54 | 109.7(7)  | O5         | C90 | C89 | 106(2)    |           |
| C49 | Fe2 | C53 | 41.6(6)   | C89        | C90 | O6  | 101(2)    |           |

*X-ray Diffraction Data for (dppf)Ni(2,4-xylyl)(Br) (6)*

Crystals suitable for X-ray diffraction were grown from a concentrated solution of **6** in THF layered with pentane at -15 °C. Low-temperature diffraction data ( $\omega$ -scans) were collected on a Rigaku SCX Mini diffractometer coupled to a Rigaku Mercury275R CCD with Mo K $\alpha$  radiation ( $\lambda = 0.71073 \text{ \AA}$ ) for the structure of **6**. The diffraction images were processed and scaled using Rigaku Oxford Diffraction software.<sup>10</sup> The structure was solved with SHELXT and was refined against  $F^2$  on all data by full-matrix least squares with SHELXL.<sup>11</sup> All non-hydrogen atoms were refined anisotropically. Hydrogen atoms were included in the model at geometrically calculated positions and refined using a riding model. The isotropic displacement parameters of all hydrogen atoms were fixed to 1.2 times the U value of the atoms to which they are linked (1.5 times for methyl groups). The crystal diffracted poorly, resulting in a low  $I/\sigma$  and a high value of RInt. Seven reflections were omitted in which the Error/esd value was abnormally high. These reflections were located close to the beamstop. The full numbering scheme of compound **6** can be found in the full details of the X-ray structure determination (CIF), which is included as Supporting Information. CCDC number 1860563 contains the supplementary crystallographic data for this paper. These data can be obtained free of charge from The Cambridge Crystallographic Data Center via [www.ccdc.cam.ac.uk/data\\_request/cif](http://www.ccdc.cam.ac.uk/data_request/cif).

**Table S25.** Crystal data and structure refinement for **6**.

|                                    |                                                       |
|------------------------------------|-------------------------------------------------------|
| Empirical formula                  | C <sub>46</sub> H <sub>45</sub> BrFeNiOP <sub>2</sub> |
| Formula weight                     | 870.23                                                |
| Temperature/K                      | 93.15                                                 |
| Crystal system                     | monoclinic                                            |
| Space group                        | P2 <sub>1</sub> /c                                    |
| a/ $\text{\AA}$                    | 12.2522(7)                                            |
| b/ $\text{\AA}$                    | 15.2797(7)                                            |
| c/ $\text{\AA}$                    | 20.2170(10)                                           |
| $\alpha/^\circ$                    | 90                                                    |
| $\beta/^\circ$                     | 96.736(5)                                             |
| $\gamma/^\circ$                    | 90                                                    |
| Volume/ $\text{\AA}^3$             | 3758.7(3)                                             |
| Z                                  | 4                                                     |
| $\rho_{\text{calc}}/\text{g/cm}^3$ | 1.538                                                 |
| $\mu/\text{mm}^{-1}$               | 2.072                                                 |

|                                                  |                                                                        |
|--------------------------------------------------|------------------------------------------------------------------------|
| F(000)                                           | 1792.0                                                                 |
| Crystal size/mm <sup>3</sup>                     | 0.02 × 0.02 × 0.002                                                    |
| Radiation                                        | MoK $\alpha$ ( $\lambda$ = 0.71073)                                    |
| 2 $\Theta$ range for data collection/ $^{\circ}$ | 4.902 to 50.048                                                        |
| Index ranges                                     | -14 $\leq$ h $\leq$ 14, -18 $\leq$ k $\leq$ 18, -24 $\leq$ l $\leq$ 24 |
| Reflections collected                            | 52841                                                                  |
| Independent reflections                          | 6634 [R <sub>int</sub> = 0.1836, R <sub>sigma</sub> = 0.0992]          |
| Data/restraints/parameters                       | 6634/0/471                                                             |
| Goodness-of-fit on F <sup>2</sup>                | 0.933                                                                  |
| Final R indexes [ $I \geq 2\sigma(I)$ ]          | R <sub>1</sub> = 0.0617, wR <sub>2</sub> = 0.1353                      |
| Final R indexes [all data]                       | R <sub>1</sub> = 0.1098, wR <sub>2</sub> = 0.1613                      |

**Table S26.** Fractional Atomic Coordinates ( $\times 10^4$ ) and Equivalent Isotropic Displacement Parameters ( $\text{\AA}^2 \times 10^3$ ) for **6**.  $U_{eq}$  is defined as 1/3 of the trace of the orthogonalised  $U_{ij}$  tensor.

| Atom | x          | y          | z         | U(eq)    |
|------|------------|------------|-----------|----------|
| Br1  | 6540.0(6)  | 7058.0(4)  | 1908.6(3) | 26.2(2)  |
| Ni1  | 7002.4(7)  | 7673.3(5)  | 2955.3(4) | 19.2(2)  |
| Fe1  | 6887.6(7)  | 6935.7(6)  | 4935.6(4) | 20.4(2)  |
| P1   | 5805.6(14) | 6735.8(11) | 3369.9(8) | 19.6(4)  |
| P2   | 7707.1(14) | 8357.6(10) | 3829.4(8) | 19.8(4)  |
| C1   | 7873(5)    | 8453(4)    | 2516(3)   | 20.7(14) |
| C2   | 8942(5)    | 8221(4)    | 2404(3)   | 22.3(15) |
| C3   | 9542(6)    | 8792(4)    | 2069(3)   | 28.6(17) |
| C4   | 9126(6)    | 9594(4)    | 1824(3)   | 27.0(16) |
| C5   | 8068(6)    | 9791(4)    | 1923(3)   | 27.1(16) |
| C6   | 7456(6)    | 9240(4)    | 2266(3)   | 26.7(16) |
| C7   | 9379(6)    | 7359(4)    | 2637(4)   | 30.5(17) |
| C8   | 9833(6)    | 10198(5)   | 1474(4)   | 38.3(19) |
| C9   | 6097(5)    | 5606(4)    | 3201(3)   | 20.1(14) |
| C10  | 5337(6)    | 4965(4)    | 3289(3)   | 21.8(15) |
| C11  | 5533(6)    | 4100(4)    | 3154(3)   | 28.3(16) |
| C12  | 6498(6)    | 3876(4)    | 2927(4)   | 33.3(17) |
| C13  | 7272(6)    | 4493(5)    | 2842(3)   | 30.6(17) |
| C14  | 7077(6)    | 5367(4)    | 2981(3)   | 23.9(15) |
| C15  | 4383(5)    | 6809(4)    | 2989(3)   | 22.1(15) |
| C16  | 3561(5)    | 7173(4)    | 3314(3)   | 26.1(16) |
| C17  | 2494(6)    | 7194(4)    | 3010(3)   | 27.9(16) |
| C18  | 2237(6)    | 6857(4)    | 2381(3)   | 28.5(16) |
| C19  | 3052(5)    | 6490(4)    | 2064(3)   | 23.7(15) |
| C20  | 4114(5)    | 6461(4)    | 2360(3)   | 23.0(15) |
| C21  | 5761(5)    | 9261(4)    | 3643(3)   | 22.0(15) |
| C22  | 5027(6)    | 9905(4)    | 3778(3)   | 25.4(16) |



|     |          |          |         |          |
|-----|----------|----------|---------|----------|
| C23 | 5297(6)  | 10504(4) | 4273(3) | 30.7(17) |
| C24 | 6304(6)  | 10461(4) | 4641(3) | 27.7(16) |
| C25 | 7048(5)  | 9833(4)  | 4518(3) | 23.0(15) |
| C26 | 6774(5)  | 9212(4)  | 4024(3) | 21.5(15) |
| C27 | 9030(5)  | 8925(4)  | 3847(3) | 19.9(14) |
| C28 | 9994(6)  | 8509(4)  | 4071(3) | 25.4(16) |
| C29 | 10979(6) | 8915(5)  | 4036(3) | 30.1(17) |
| C30 | 11035(6) | 9744(5)  | 3794(3) | 32.8(17) |
| C31 | 10073(6) | 10170(5) | 3581(3) | 30.9(17) |
| C32 | 9076(6)  | 9771(4)  | 3602(3) | 25.6(16) |
| C33 | 7974(5)  | 7699(4)  | 4561(3) | 18.5(14) |
| C34 | 8298(5)  | 6806(4)  | 4545(3) | 24.0(15) |
| C35 | 8439(5)  | 6492(4)  | 5199(3) | 25.6(15) |
| C36 | 8211(5)  | 7164(4)  | 5625(3) | 24.8(15) |
| C37 | 7939(5)  | 7911(4)  | 5239(3) | 22.4(14) |
| C38 | 5625(5)  | 6681(4)  | 4244(3) | 22.9(15) |
| C39 | 5367(5)  | 7393(4)  | 4647(3) | 24.9(15) |
| C40 | 5436(5)  | 7088(4)  | 5311(3) | 25.8(16) |
| C41 | 5724(5)  | 6205(4)  | 5322(3) | 26.6(16) |
| C42 | 5839(5)  | 5940(4)  | 4669(3) | 22.7(15) |
| O1  | 12417(5) | 7263(3)  | 4789(3) | 48.8(15) |
| C43 | 12210(7) | 7514(5)  | 5439(4) | 45(2)    |
| C44 | 11489(7) | 6827(5)  | 5653(4) | 41(2)    |
| C45 | 11812(8) | 6003(5)  | 5304(4) | 50(2)    |
| C46 | 12570(7) | 6324(5)  | 4822(4) | 46(2)    |

**Table S27.** Anisotropic Displacement Parameters ( $\text{\AA}^2 \times 10^3$ ) for **6**. The Anisotropic displacement factor exponent takes the form:  $-2\pi^2[h^2a^{*2}U_{11}+2hka^*b^*U_{12}+\dots]$ .

| Atom | U <sub>11</sub> | U <sub>22</sub> | U <sub>33</sub> | U <sub>23</sub> | U <sub>13</sub> | U <sub>12</sub> |
|------|-----------------|-----------------|-----------------|-----------------|-----------------|-----------------|
| Br1  | 36.4(4)         | 27.5(4)         | 14.3(3)         | -0.7(3)         | 1.8(3)          | -7.1(3)         |
| Ni1  | 26.5(5)         | 17.9(4)         | 13.2(4)         | 0.6(3)          | 1.9(3)          | -0.5(4)         |
| Fe1  | 26.6(5)         | 21.6(5)         | 13.0(5)         | 1.5(4)          | 2.1(4)          | -1.3(4)         |
| P1   | 28.0(10)        | 17.1(8)         | 13.3(8)         | 0.9(6)          | 1.0(7)          | -0.4(7)         |
| P2   | 27.1(10)        | 16.2(8)         | 15.9(8)         | 0.8(7)          | 2.5(7)          | 0.5(7)          |
| C1   | 25(4)           | 18(3)           | 19(3)           | -5(3)           | 1(3)            | -7(3)           |
| C2   | 31(4)           | 20(3)           | 16(3)           | -2(3)           | -1(3)           | -2(3)           |
| C3   | 32(4)           | 35(4)           | 19(4)           | -13(3)          | 2(3)            | -11(3)          |
| C4   | 40(4)           | 27(4)           | 14(3)           | -4(3)           | 5(3)            | -10(3)          |
| C5   | 34(4)           | 22(4)           | 23(4)           | -3(3)           | -9(3)           | -5(3)           |
| C6   | 40(4)           | 20(4)           | 20(4)           | 5(3)            | 3(3)            | -8(3)           |
| C7   | 26(4)           | 28(4)           | 38(4)           | -8(3)           | 5(3)            | 4(3)            |
| C8   | 45(5)           | 32(4)           | 38(5)           | -4(3)           | 4(4)            | -13(4)          |

|     |       |       |       |       |       |        |
|-----|-------|-------|-------|-------|-------|--------|
| C9  | 31(4) | 18(3) | 10(3) | 1(3)  | 0(3)  | 2(3)   |
| C10 | 35(4) | 17(3) | 14(3) | 1(3)  | 3(3)  | 5(3)   |
| C11 | 40(4) | 18(4) | 26(4) | 3(3)  | -3(3) | -11(3) |
| C12 | 46(5) | 17(4) | 36(4) | 2(3)  | -3(4) | 9(4)   |
| C13 | 28(4) | 36(4) | 25(4) | -6(3) | -6(3) | 8(3)   |
| C14 | 26(4) | 23(4) | 21(3) | 1(3)  | -3(3) | 3(3)   |
| C15 | 34(4) | 13(3) | 20(3) | 2(3)  | 8(3)  | -2(3)  |
| C16 | 27(4) | 32(4) | 20(3) | -1(3) | 5(3)  | 0(3)   |
| C17 | 28(4) | 33(4) | 25(4) | 0(3)  | 11(3) | 1(3)   |
| C18 | 26(4) | 26(4) | 32(4) | 3(3)  | -3(3) | -5(3)  |
| C19 | 34(4) | 21(3) | 15(3) | -1(3) | 1(3)  | -3(3)  |
| C20 | 33(4) | 22(3) | 15(3) | -3(3) | 5(3)  | -1(3)  |
| C21 | 32(4) | 20(3) | 13(3) | 2(3)  | 1(3)  | -6(3)  |
| C22 | 34(4) | 24(4) | 20(4) | 6(3)  | 10(3) | 0(3)   |
| C23 | 46(5) | 17(4) | 32(4) | 4(3)  | 20(4) | 7(3)   |
| C24 | 44(5) | 23(4) | 18(4) | 0(3)  | 13(3) | 0(3)   |
| C25 | 28(4) | 26(4) | 16(3) | 1(3)  | 7(3)  | 1(3)   |
| C26 | 33(4) | 14(3) | 19(3) | 5(3)  | 10(3) | 0(3)   |
| C27 | 31(4) | 18(3) | 10(3) | 3(3)  | 0(3)  | 0(3)   |
| C28 | 38(4) | 24(4) | 13(3) | 0(3)  | 1(3)  | 0(3)   |
| C29 | 23(4) | 41(4) | 25(4) | -5(3) | -5(3) | 1(3)   |
| C30 | 33(4) | 38(4) | 27(4) | -2(3) | 3(3)  | -10(4) |
| C31 | 40(5) | 25(4) | 29(4) | 1(3)  | 9(3)  | -2(4)  |
| C32 | 38(4) | 18(3) | 20(4) | -3(3) | 3(3)  | 3(3)   |
| C33 | 24(4) | 19(3) | 14(3) | 4(3)  | 5(3)  | -2(3)  |
| C34 | 28(4) | 21(3) | 22(4) | -8(3) | -1(3) | 4(3)   |
| C35 | 26(4) | 29(4) | 22(4) | 7(3)  | 3(3)  | 2(3)   |
| C36 | 29(4) | 30(4) | 14(3) | -1(3) | -3(3) | 2(3)   |
| C37 | 24(4) | 22(3) | 20(3) | 0(3)  | -2(3) | 3(3)   |
| C38 | 26(4) | 23(3) | 20(3) | 1(3)  | 1(3)  | -4(3)  |
| C39 | 27(4) | 28(4) | 20(4) | 1(3)  | 6(3)  | -3(3)  |
| C40 | 29(4) | 34(4) | 15(3) | -8(3) | 6(3)  | -7(3)  |
| C41 | 31(4) | 30(4) | 19(4) | 2(3)  | 4(3)  | -9(3)  |
| C42 | 31(4) | 16(3) | 21(3) | -3(3) | 2(3)  | 0(3)   |
| O1  | 74(4) | 40(3) | 35(3) | 10(3) | 20(3) | 10(3)  |
| C43 | 56(6) | 51(5) | 29(4) | -6(4) | 9(4)  | 4(4)   |
| C44 | 42(5) | 51(5) | 31(4) | 3(4)  | 5(4)  | -3(4)  |
| C45 | 77(7) | 34(5) | 38(5) | -1(4) | 9(4)  | -7(5)  |
| C46 | 45(5) | 46(5) | 47(5) | -2(4) | 10(4) | -11(4) |

**Table S28.** Bond Lengths for **6**.

| Atom | Atom | Length/Å   | Atom | Atom | Length/Å  |
|------|------|------------|------|------|-----------|
| Br1  | Ni1  | 2.3241(10) | C15  | C16  | 1.381(9)  |
| Ni1  | P1   | 2.2787(19) | C15  | C20  | 1.383(8)  |
| Ni1  | P2   | 2.1456(18) | C16  | C17  | 1.378(9)  |
| Ni1  | C1   | 1.889(6)   | C17  | C18  | 1.374(9)  |
| Fe1  | C33  | 1.986(6)   | C18  | C19  | 1.368(9)  |
| Fe1  | C34  | 1.993(7)   | C19  | C20  | 1.367(9)  |
| Fe1  | C35  | 2.030(7)   | C21  | C22  | 1.382(9)  |
| Fe1  | C36  | 2.041(6)   | C21  | C26  | 1.383(9)  |
| Fe1  | C37  | 2.018(6)   | C22  | C23  | 1.368(9)  |
| Fe1  | C38  | 1.998(6)   | C23  | C24  | 1.365(10) |
| Fe1  | C39  | 2.011(7)   | C24  | C25  | 1.367(9)  |
| Fe1  | C40  | 2.027(7)   | C25  | C26  | 1.389(9)  |
| Fe1  | C41  | 2.038(6)   | C27  | C28  | 1.371(9)  |
| Fe1  | C42  | 2.023(6)   | C27  | C32  | 1.387(9)  |
| P1   | C9   | 1.804(6)   | C28  | C29  | 1.366(9)  |
| P1   | C15  | 1.825(7)   | C29  | C30  | 1.362(10) |
| P1   | C38  | 1.809(6)   | C30  | C31  | 1.371(10) |
| P2   | C26  | 1.809(6)   | C31  | C32  | 1.371(9)  |
| P2   | C27  | 1.834(7)   | C33  | C34  | 1.423(8)  |
| P2   | C33  | 1.787(6)   | C33  | C37  | 1.414(8)  |
| C1   | C2   | 1.401(9)   | C34  | C35  | 1.398(9)  |
| C1   | C6   | 1.379(9)   | C35  | C36  | 1.389(9)  |
| C2   | C3   | 1.370(9)   | C36  | C37  | 1.401(9)  |
| C2   | C7   | 1.479(9)   | C38  | C39  | 1.417(9)  |
| C3   | C4   | 1.394(9)   | C38  | C42  | 1.426(9)  |
| C4   | C5   | 1.368(9)   | C39  | C40  | 1.413(9)  |
| C4   | C8   | 1.500(9)   | C40  | C41  | 1.394(9)  |
| C5   | C6   | 1.369(9)   | C41  | C42  | 1.404(8)  |
| C9   | C10  | 1.376(9)   | O1   | C43  | 1.420(8)  |
| C9   | C14  | 1.379(9)   | O1   | C46  | 1.447(9)  |
| C10  | C11  | 1.376(9)   | C43  | C44  | 1.469(10) |
| C11  | C12  | 1.362(10)  | C44  | C45  | 1.519(10) |
| C12  | C13  | 1.362(10)  | C45  | C46  | 1.505(10) |
| C13  | C14  | 1.391(9)   |      |      |           |

**Table S29.** Bond Angles for **6**.

| Atom | Atom | Atom | Angle/°   | Atom | Atom | Atom | Angle/°  |
|------|------|------|-----------|------|------|------|----------|
| P1   | Ni1  | Br1  | 88.97(5)  | C5   | C6   | C1   | 121.4(7) |
| P2   | Ni1  | Br1  | 168.13(6) | C10  | C9   | P1   | 120.3(5) |
| P2   | Ni1  | P1   | 102.56(7) | C10  | C9   | C14  | 118.8(6) |

|     |     |     |            |     |     |     |          |
|-----|-----|-----|------------|-----|-----|-----|----------|
| C1  | Ni1 | Br1 | 85.28(18)  | C14 | C9  | P1  | 120.9(5) |
| C1  | Ni1 | P1  | 173.02(19) | C11 | C10 | C9  | 121.4(6) |
| C1  | Ni1 | P2  | 83.40(19)  | C12 | C11 | C10 | 119.1(7) |
| C33 | Fe1 | C34 | 41.9(2)    | C13 | C12 | C11 | 120.8(6) |
| C33 | Fe1 | C35 | 69.3(3)    | C12 | C13 | C14 | 120.1(7) |
| C33 | Fe1 | C36 | 69.2(3)    | C9  | C14 | C13 | 119.7(7) |
| C33 | Fe1 | C37 | 41.4(2)    | C16 | C15 | P1  | 122.5(5) |
| C33 | Fe1 | C38 | 110.2(3)   | C16 | C15 | C20 | 119.0(6) |
| C33 | Fe1 | C39 | 109.0(3)   | C20 | C15 | P1  | 118.5(5) |
| C33 | Fe1 | C40 | 137.1(3)   | C17 | C16 | C15 | 120.2(6) |
| C33 | Fe1 | C41 | 177.2(3)   | C18 | C17 | C16 | 120.5(6) |
| C33 | Fe1 | C42 | 140.6(2)   | C19 | C18 | C17 | 119.1(6) |
| C34 | Fe1 | C35 | 40.7(2)    | C20 | C19 | C18 | 121.2(6) |
| C34 | Fe1 | C36 | 68.4(3)    | C19 | C20 | C15 | 120.1(6) |
| C34 | Fe1 | C37 | 69.0(3)    | C22 | C21 | C26 | 119.3(6) |
| C34 | Fe1 | C38 | 109.8(3)   | C23 | C22 | C21 | 120.9(7) |
| C34 | Fe1 | C39 | 137.5(3)   | C24 | C23 | C22 | 119.5(7) |
| C34 | Fe1 | C40 | 178.4(3)   | C23 | C24 | C25 | 121.0(6) |
| C34 | Fe1 | C41 | 140.9(3)   | C24 | C25 | C26 | 120.0(6) |
| C34 | Fe1 | C42 | 111.9(3)   | C21 | C26 | P2  | 117.8(5) |
| C35 | Fe1 | C36 | 39.9(3)    | C21 | C26 | C25 | 119.3(6) |
| C35 | Fe1 | C41 | 113.1(3)   | C25 | C26 | P2  | 122.9(5) |
| C37 | Fe1 | C35 | 67.8(3)    | C28 | C27 | P2  | 120.8(5) |
| C37 | Fe1 | C36 | 40.4(2)    | C28 | C27 | C32 | 118.7(6) |
| C37 | Fe1 | C40 | 111.0(3)   | C32 | C27 | P2  | 120.4(5) |
| C37 | Fe1 | C41 | 137.6(3)   | C29 | C28 | C27 | 120.3(6) |
| C37 | Fe1 | C42 | 177.7(2)   | C30 | C29 | C28 | 121.5(7) |
| C38 | Fe1 | C35 | 138.0(3)   | C29 | C30 | C31 | 118.4(7) |
| C38 | Fe1 | C36 | 177.9(3)   | C32 | C31 | C30 | 121.1(7) |
| C38 | Fe1 | C37 | 140.4(3)   | C31 | C32 | C27 | 119.9(7) |
| C38 | Fe1 | C39 | 41.4(3)    | P2  | C33 | Fe1 | 125.5(3) |
| C38 | Fe1 | C40 | 69.1(3)    | C34 | C33 | Fe1 | 69.3(4)  |
| C38 | Fe1 | C41 | 69.0(3)    | C34 | C33 | P2  | 123.1(5) |
| C38 | Fe1 | C42 | 41.6(2)    | C37 | C33 | Fe1 | 70.5(4)  |
| C39 | Fe1 | C35 | 178.1(3)   | C37 | C33 | P2  | 130.5(5) |
| C39 | Fe1 | C36 | 140.7(3)   | C37 | C33 | C34 | 106.4(5) |
| C39 | Fe1 | C37 | 111.6(3)   | C33 | C34 | Fe1 | 68.8(3)  |
| C39 | Fe1 | C40 | 41.0(3)    | C35 | C34 | Fe1 | 71.1(4)  |
| C39 | Fe1 | C41 | 68.6(3)    | C35 | C34 | C33 | 108.1(5) |
| C39 | Fe1 | C42 | 69.3(3)    | C34 | C35 | Fe1 | 68.3(4)  |
| C40 | Fe1 | C35 | 140.9(3)   | C36 | C35 | Fe1 | 70.5(4)  |
| C40 | Fe1 | C36 | 112.8(3)   | C36 | C35 | C34 | 108.8(6) |

|     |     |     |          |     |     |     |          |
|-----|-----|-----|----------|-----|-----|-----|----------|
| C40 | Fe1 | C41 | 40.1(3)  | C35 | C36 | Fe1 | 69.6(4)  |
| C41 | Fe1 | C36 | 111.6(3) | C35 | C36 | C37 | 108.0(6) |
| C42 | Fe1 | C35 | 111.4(3) | C37 | C36 | Fe1 | 68.9(4)  |
| C42 | Fe1 | C36 | 137.7(3) | C33 | C37 | Fe1 | 68.1(4)  |
| C42 | Fe1 | C40 | 68.2(3)  | C36 | C37 | Fe1 | 70.7(4)  |
| C42 | Fe1 | C41 | 40.4(2)  | C36 | C37 | C33 | 108.7(6) |
| C9  | P1  | Ni1 | 112.5(2) | P1  | C38 | Fe1 | 120.1(3) |
| C9  | P1  | C15 | 100.3(3) | C39 | C38 | Fe1 | 69.8(4)  |
| C9  | P1  | C38 | 100.9(3) | C39 | C38 | P1  | 126.0(5) |
| C15 | P1  | Ni1 | 115.5(2) | C39 | C38 | C42 | 107.5(5) |
| C38 | P1  | Ni1 | 123.1(2) | C42 | C38 | Fe1 | 70.2(4)  |
| C38 | P1  | C15 | 101.2(3) | C42 | C38 | P1  | 126.2(5) |
| C26 | P2  | Ni1 | 109.1(2) | C38 | C39 | Fe1 | 68.8(4)  |
| C26 | P2  | C27 | 103.6(3) | C40 | C39 | Fe1 | 70.2(4)  |
| C27 | P2  | Ni1 | 121.0(2) | C40 | C39 | C38 | 107.5(6) |
| C33 | P2  | Ni1 | 115.1(2) | C39 | C40 | Fe1 | 68.9(4)  |
| C33 | P2  | C26 | 106.6(3) | C41 | C40 | Fe1 | 70.3(4)  |
| C33 | P2  | C27 | 100.1(3) | C41 | C40 | C39 | 108.7(6) |
| C2  | C1  | Ni1 | 120.5(5) | C40 | C41 | Fe1 | 69.5(4)  |
| C6  | C1  | Ni1 | 121.1(5) | C40 | C41 | C42 | 108.5(6) |
| C6  | C1  | C2  | 118.3(6) | C42 | C41 | Fe1 | 69.2(4)  |
| C1  | C2  | C7  | 119.0(6) | C38 | C42 | Fe1 | 68.3(4)  |
| C3  | C2  | C1  | 119.0(6) | C41 | C42 | Fe1 | 70.3(4)  |
| C3  | C2  | C7  | 122.0(6) | C41 | C42 | C38 | 107.8(6) |
| C2  | C3  | C4  | 122.7(7) | C43 | O1  | C46 | 105.2(6) |
| C3  | C4  | C8  | 120.1(7) | O1  | C43 | C44 | 105.0(6) |
| C5  | C4  | C3  | 117.0(6) | C43 | C44 | C45 | 104.9(6) |
| C5  | C4  | C8  | 122.9(6) | C46 | C45 | C44 | 104.1(6) |
| C4  | C5  | C6  | 121.6(7) | O1  | C46 | C45 | 105.5(6) |

*X-ray Diffraction Data for (dppf)Ni(2-methyl-4-nitrophenyl)(Br) (7)*

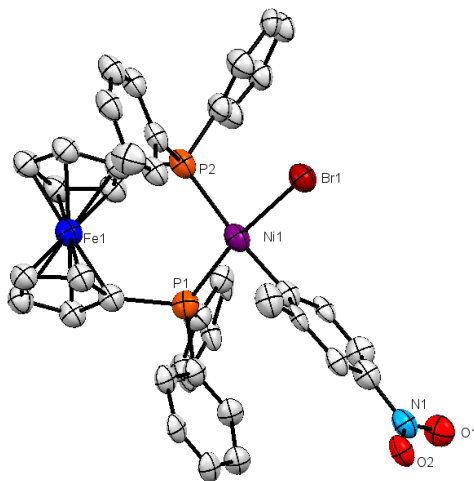

**Figure S59.** ORTEP of **7**, with ellipsoids shown at 50% probability. Hydrogen atoms and solvent of crystallization have been removed for clarity.

Crystals suitable for X-ray diffraction were grown from a concentrated solution of **7** in THF layered with pentane at  $-15\text{ }^{\circ}\text{C}$ . Low-temperature diffraction data ( $\omega$ -scans) were collected on a Rigaku MicroMax-007HF diffractometer coupled to a Saturn994+ CCD detector with Cu  $K\alpha$  ( $\lambda = 1.54178\text{ \AA}$ ) for the structure of **7** (Figure S59). The diffraction images were processed and scaled using Rigaku Oxford Diffraction software.<sup>10</sup> The structure was solved with SHELXT and was refined against  $F^2$  on all data by full-matrix least squares with SHELXL.<sup>11</sup> The model presented here was obtained from low angle data. The crystal weakly diffracted, but the connectivity of this model was determined from the low resolution Fourier map. This model is intended to establish only the connectivity of the compound that crystallized. Additionally, this data was refined as a 2-component twin. The fractional volume contribution of the minor twin component was freely refined to a converged value of 0.188(8). The HKLF5 data was generated by the program PLATON, and the twin law was found by TWINROTMAT. An anisotropic refinement was performed, which increased the number of refined parameters. Due to the small number of reflections collected and poor resolution, a global rigid body restraint was used in the refinement. Hydrogen atoms were included in the model at geometrically calculated positions and refined using a riding model. The isotropic displacement parameters of all hydrogen atoms were fixed to 1.2 times the U value of the atoms to which they are linked (1.5 times for methyl groups). The full numbering scheme of compound **7** can be found in the full details of the X-ray structure

determination (CIF), which is included as Supporting Information. CCDC number 1860569 contains the supplementary crystallographic data for this paper. These data can be obtained free of charge from The Cambridge Crystallographic Data Center via [www.ccdc.cam.ac.uk/data\\_request/cif](http://www.ccdc.cam.ac.uk/data_request/cif).

**Table S30.** Crystal data and structure refinement for **7**.

|                                      |                                                                      |
|--------------------------------------|----------------------------------------------------------------------|
| Empirical formula                    | C <sub>41</sub> H <sub>34</sub> BrFeNNiO <sub>2</sub> P <sub>2</sub> |
| Formula weight                       | 829.10                                                               |
| Temperature/K                        | 93(2)                                                                |
| Crystal system                       | monoclinic                                                           |
| Space group                          | P2 <sub>1</sub> /c                                                   |
| a/Å                                  | 12.0139(13)                                                          |
| b/Å                                  | 11.9643(11)                                                          |
| c/Å                                  | 25.102(4)                                                            |
| α/°                                  | 90                                                                   |
| β/°                                  | 103.138(13)                                                          |
| γ/°                                  | 90                                                                   |
| Volume/Å <sup>3</sup>                | 3513.7(7)                                                            |
| Z                                    | 4                                                                    |
| ρ <sub>calc</sub> /g/cm <sup>3</sup> | 1.567                                                                |
| μ/mm <sup>-1</sup>                   | 6.467                                                                |
| F(000)                               | 1688.0                                                               |
| Crystal size/mm <sup>3</sup>         | 0.100 × 0.030 × 0.020                                                |
| Radiation                            | CuKα (λ = 1.54184)                                                   |
| 2θ range for data collection/°       | 7.232 to 80.026                                                      |
| Index ranges                         | -10 ≤ h ≤ 9, -9 ≤ k ≤ 9, -20 ≤ l ≤ 20                                |
| Reflections collected                | 2113                                                                 |
| Independent reflections              | 2113 [R <sub>int</sub> = 0.2707, R <sub>sigma</sub> = 0.0995]        |
| Data/restraints/parameters           | 2113/510/444                                                         |
| Goodness-of-fit on F <sup>2</sup>    | 1.111                                                                |
| Final R indexes [I ≥ 2σ (I)]         | R <sub>1</sub> = 0.1118, wR <sub>2</sub> = 0.2808                    |
| Final R indexes [all data]           | R <sub>1</sub> = 0.1376, wR <sub>2</sub> = 0.3028                    |

**Table S31.** Fractional Atomic Coordinates (×10<sup>4</sup>) and Equivalent Isotropic Displacement Parameters (Å<sup>2</sup>×10<sup>3</sup>) for **7**. U<sub>eq</sub> is defined as 1/3 of the trace of the orthogonalised U<sub>ij</sub> tensor.

| Atom | x       | y       | z          | U(eq)    |
|------|---------|---------|------------|----------|
| Br1  | 5786(3) | 6449(3) | 2235.4(13) | 48.9(13) |
| Ni1  | 6922(4) | 4865(4) | 2250.2(19) | 43.1(17) |
| Fe1  | 7484(4) | 2312(4) | 1137.4(19) | 46.4(17) |
| P1   | 8024(7) | 3402(7) | 2420(3)    | 45(2)    |
| P2   | 6330(7) | 4800(7) | 1323(3)    | 44(2)    |

|     |           |          |          |       |
|-----|-----------|----------|----------|-------|
| O1  | 9429(17)  | 6247(18) | 4889(8)  | 56(6) |
| O2  | 8208(16)  | 5070(16) | 5019(8)  | 47(5) |
| N1  | 8670(20)  | 5590(20) | 4721(11) | 43(7) |
| C1  | 7410(20)  | 5070(20) | 3004(12) | 40(5) |
| C2  | 6750(20)  | 4770(20) | 3376(12) | 36(7) |
| C3  | 7140(20)  | 4920(20) | 3960(12) | 38(7) |
| C4  | 8160(30)  | 5490(30) | 4111(13) | 45(8) |
| C5  | 8780(30)  | 5830(30) | 3781(13) | 46(8) |
| C6  | 8420(20)  | 5720(20) | 3225(12) | 36(7) |
| C7  | 5590(20)  | 4240(30) | 3202(13) | 53(8) |
| C8  | 7790(20)  | 2220(30) | 1949(12) | 41(4) |
| C9  | 6720(30)  | 1730(30) | 1728(11) | 45(5) |
| C10 | 6840(20)  | 840(30)  | 1371(12) | 45(5) |
| C11 | 8030(20)  | 770(30)  | 1403(12) | 46(5) |
| C12 | 8590(30)  | 1570(20) | 1761(11) | 43(5) |
| C13 | 6930(30)  | 3870(30) | 877(12)  | 47(4) |
| C14 | 6360(30)  | 3070(20) | 506(11)  | 46(5) |
| C15 | 7130(20)  | 2440(30) | 301(12)  | 46(5) |
| C16 | 8280(30)  | 2880(30) | 554(11)  | 46(5) |
| C17 | 8120(20)  | 3770(20) | 909(12)  | 44(5) |
| C18 | 8120(20)  | 2690(30) | 3084(12) | 41(6) |
| C19 | 8960(20)  | 2950(30) | 3553(11) | 42(8) |
| C20 | 8970(20)  | 2430(30) | 4035(12) | 42(8) |
| C21 | 8080(20)  | 1670(20) | 4056(12) | 40(8) |
| C22 | 7280(30)  | 1450(20) | 3610(12) | 38(7) |
| C23 | 7250(20)  | 1910(20) | 3097(12) | 40(7) |
| C24 | 9480(20)  | 3800(30) | 2408(12) | 43(6) |
| C25 | 10440(20) | 3100(30) | 2647(11) | 43(7) |
| C26 | 11550(30) | 3360(30) | 2607(12) | 47(8) |
| C27 | 11700(30) | 4340(30) | 2337(12) | 47(8) |
| C28 | 10790(20) | 5010(20) | 2089(11) | 37(7) |
| C29 | 9730(20)  | 4760(30) | 2165(11) | 38(7) |
| C30 | 4800(20)  | 4350(20) | 1129(13) | 42(6) |
| C31 | 4380(20)  | 3770(20) | 1497(13) | 44(8) |
| C32 | 3320(30)  | 3250(30) | 1369(14) | 61(9) |
| C33 | 2650(30)  | 3470(30) | 850(13)  | 50(8) |
| C34 | 3030(30)  | 4070(30) | 487(13)  | 49(8) |
| C35 | 4120(20)  | 4530(20) | 587(12)  | 44(7) |
| C36 | 6400(30)  | 6170(30) | 1013(12) | 45(6) |
| C37 | 5500(30)  | 6870(30) | 857(12)  | 53(8) |
| C38 | 5630(30)  | 7940(20) | 636(11)  | 41(7) |
| C39 | 6700(20)  | 8320(30) | 594(12)  | 48(8) |



|     |          |          |         |       |
|-----|----------|----------|---------|-------|
| C40 | 7670(30) | 7570(30) | 780(12) | 48(8) |
| C41 | 7500(30) | 6520(30) | 971(13) | 54(8) |

**Table S32.** Anisotropic Displacement Parameters ( $\text{\AA}^2 \times 10^3$ ) for **7**. The Anisotropic displacement factor exponent takes the form:  $-2\pi^2[h^2a^{*2}U_{11}+2hka^*b^*U_{12}+\dots]$ .

| Atom | U <sub>11</sub> | U <sub>22</sub> | U <sub>33</sub> | U <sub>23</sub> | U <sub>13</sub> | U <sub>12</sub> |
|------|-----------------|-----------------|-----------------|-----------------|-----------------|-----------------|
| Br1  | 43(2)           | 46(3)           | 59(2)           | 0.3(19)         | 14.6(17)        | 5.1(19)         |
| Ni1  | 35(3)           | 38(3)           | 58(3)           | -1(3)           | 13(2)           | 2(3)            |
| Fe1  | 41(3)           | 46(4)           | 53(3)           | -1(2)           | 13(2)           | 1(3)            |
| P1   | 36(4)           | 47(5)           | 52(5)           | -4(4)           | 11(4)           | -3(4)           |
| P2   | 38(5)           | 37(5)           | 61(5)           | 0(4)            | 17(4)           | 0(4)            |
| O1   | 52(12)          | 52(14)          | 66(12)          | 4(9)            | 16(9)           | -12(10)         |
| O2   | 49(12)          | 33(12)          | 66(11)          | -2(9)           | 28(9)           | 2(10)           |
| N1   | 36(13)          | 36(15)          | 63(9)           | -1(8)           | 21(8)           | 5(9)            |
| C1   | 29(10)          | 35(12)          | 57(7)           | -1(6)           | 12(6)           | 2(8)            |
| C2   | 36(10)          | 17(16)          | 59(8)           | -2(8)           | 17(7)           | 7(10)           |
| C3   | 32(11)          | 28(17)          | 59(9)           | -2(8)           | 20(7)           | 3(11)           |
| C4   | 35(12)          | 41(18)          | 62(9)           | 0(8)            | 20(7)           | -1(11)          |
| C5   | 32(12)          | 50(19)          | 59(9)           | -1(9)           | 16(7)           | -7(12)          |
| C6   | 25(11)          | 24(15)          | 60(9)           | -1(8)           | 12(7)           | 8(10)           |
| C7   | 43(11)          | 50(20)          | 75(16)          | -9(14)          | 20(10)          | -4(12)          |
| C8   | 35(9)           | 40(8)           | 50(6)           | -1(5)           | 12(5)           | -1(6)           |
| C9   | 37(9)           | 45(9)           | 53(8)           | -1(6)           | 12(6)           | -1(6)           |
| C10  | 41(9)           | 44(8)           | 50(10)          | 1(6)            | 10(7)           | 0(6)            |
| C11  | 42(9)           | 43(7)           | 53(9)           | -3(6)           | 12(7)           | 3(6)            |
| C12  | 37(8)           | 41(8)           | 52(8)           | 0(6)            | 12(6)           | 0(6)            |
| C13  | 40(8)           | 44(7)           | 57(8)           | 0(5)            | 15(6)           | 4(6)            |
| C14  | 42(9)           | 44(9)           | 55(8)           | 2(6)            | 14(6)           | 5(6)            |
| C15  | 41(10)          | 44(10)          | 54(7)           | 1(6)            | 14(6)           | 4(7)            |
| C16  | 42(9)           | 45(10)          | 54(9)           | 2(7)            | 16(6)           | 5(7)            |
| C17  | 38(8)           | 43(8)           | 53(10)          | 2(6)            | 15(7)           | 5(6)            |
| C18  | 43(12)          | 39(12)          | 46(7)           | -6(7)           | 19(7)           | 5(9)            |
| C19  | 44(13)          | 42(16)          | 44(9)           | 1(9)            | 21(8)           | -4(11)          |
| C20  | 46(14)          | 43(17)          | 44(10)          | 0(9)            | 21(9)           | -4(12)          |
| C21  | 45(15)          | 39(17)          | 44(11)          | -7(10)          | 28(9)           | -2(12)          |
| C22  | 43(14)          | 32(15)          | 46(11)          | -9(10)          | 26(9)           | 7(11)           |
| C23  | 42(13)          | 39(14)          | 45(11)          | -8(9)           | 22(9)           | 6(11)           |
| C24  | 33(7)           | 50(11)          | 47(14)          | -1(9)           | 9(7)            | -4(6)           |
| C25  | 33(8)           | 43(13)          | 49(17)          | -12(11)         | -1(9)           | -8(8)           |
| C26  | 34(9)           | 31(15)          | 73(19)          | -18(13)         | 7(9)            | -8(9)           |
| C27  | 32(11)          | 30(15)          | 80(20)          | -18(13)         | 17(10)          | -2(9)           |
| C28  | 34(10)          | 28(13)          | 56(17)          | -21(11)         | 25(11)          | 0(9)            |

|     |        |        |        |         |        |         |
|-----|--------|--------|--------|---------|--------|---------|
| C29 | 30(10) | 47(12) | 41(16) | -7(11)  | 14(9)  | 1(8)    |
| C30 | 37(7)  | 27(14) | 65(11) | -4(9)   | 17(6)  | 1(7)    |
| C31 | 35(11) | 34(17) | 65(12) | 0(11)   | 15(8)  | 0(10)   |
| C32 | 43(12) | 60(20) | 81(15) | 11(14)  | 11(9)  | -15(13) |
| C33 | 42(12) | 33(19) | 76(15) | -1(13)  | 16(10) | -3(11)  |
| C34 | 40(11) | 34(19) | 74(14) | 0(12)   | 14(9)  | -2(10)  |
| C35 | 38(10) | 31(17) | 65(11) | -2(10)  | 15(8)  | 1(10)   |
| C36 | 41(10) | 38(8)  | 55(14) | -5(7)   | 5(9)   | -8(7)   |
| C37 | 44(11) | 43(11) | 70(20) | 3(11)   | 10(10) | -6(8)   |
| C38 | 40(12) | 36(11) | 45(17) | -10(11) | 6(11)  | -8(9)   |
| C39 | 41(12) | 36(12) | 67(19) | -1(12)  | 11(13) | -8(9)   |
| C40 | 40(12) | 38(12) | 60(20) | -5(12)  | 8(11)  | -8(8)   |
| C41 | 42(11) | 42(12) | 80(20) | 2(12)   | 9(10)  | -8(8)   |

**Table S33.** Bond Lengths for **7**.

| Atom | Atom | Length/Å  | Atom | Atom | Length/Å |
|------|------|-----------|------|------|----------|
| Br1  | Ni1  | 2.331(6)  | C9   | C10  | 1.42(4)  |
| Ni1  | C1   | 1.87(3)   | C10  | C11  | 1.42(4)  |
| Ni1  | P1   | 2.178(10) | C11  | C12  | 1.39(4)  |
| Ni1  | P2   | 2.276(10) | C13  | C14  | 1.40(4)  |
| Fe1  | C8   | 1.99(3)   | C13  | C17  | 1.42(4)  |
| Fe1  | C12  | 2.01(3)   | C14  | C15  | 1.39(4)  |
| Fe1  | C11  | 2.03(3)   | C15  | C16  | 1.47(4)  |
| Fe1  | C17  | 2.04(3)   | C16  | C17  | 1.42(4)  |
| Fe1  | C16  | 2.04(3)   | C18  | C19  | 1.40(4)  |
| Fe1  | C9   | 2.04(3)   | C18  | C23  | 1.40(4)  |
| Fe1  | C13  | 2.04(3)   | C19  | C20  | 1.36(4)  |
| Fe1  | C14  | 2.05(3)   | C20  | C21  | 1.42(4)  |
| Fe1  | C15  | 2.05(3)   | C21  | C22  | 1.33(4)  |
| Fe1  | C10  | 2.06(3)   | C22  | C23  | 1.39(4)  |
| P1   | C24  | 1.82(3)   | C24  | C29  | 1.36(4)  |
| P1   | C8   | 1.82(3)   | C24  | C25  | 1.44(4)  |
| P1   | C18  | 1.85(3)   | C25  | C26  | 1.40(4)  |
| P2   | C36  | 1.83(3)   | C26  | C27  | 1.38(4)  |
| P2   | C13  | 1.83(3)   | C27  | C28  | 1.39(4)  |
| P2   | C30  | 1.87(3)   | C28  | C29  | 1.36(3)  |
| O1   | N1   | 1.21(3)   | C30  | C31  | 1.34(4)  |
| O2   | N1   | 1.20(3)   | C30  | C35  | 1.43(4)  |
| N1   | C4   | 1.52(4)   | C31  | C32  | 1.39(4)  |
| C1   | C2   | 1.40(4)   | C32  | C33  | 1.39(4)  |
| C1   | C6   | 1.45(4)   | C33  | C34  | 1.32(4)  |
| C2   | C3   | 1.44(4)   | C34  | C35  | 1.39(4)  |

|    |     |         |     |     |         |
|----|-----|---------|-----|-----|---------|
| C2 | C7  | 1.51(4) | C36 | C37 | 1.36(4) |
| C3 | C4  | 1.37(4) | C36 | C41 | 1.41(4) |
| C4 | C5  | 1.31(4) | C37 | C38 | 1.42(4) |
| C5 | C6  | 1.37(4) | C38 | C39 | 1.39(4) |
| C8 | C12 | 1.40(4) | C39 | C40 | 1.46(4) |
| C8 | C9  | 1.41(4) | C40 | C41 | 1.38(4) |

**Table S34.** Bond Angles for **7**.

| Atom | Atom | Atom | Angle/°   | Atom | Atom | Atom | Angle/°   |
|------|------|------|-----------|------|------|------|-----------|
| C1   | Ni1  | P1   | 82.4(9)   | C5   | C4   | C3   | 126(3)    |
| C1   | Ni1  | P2   | 174.6(10) | C5   | C4   | N1   | 117(3)    |
| P1   | Ni1  | P2   | 102.0(3)  | C3   | C4   | N1   | 117(3)    |
| C1   | Ni1  | Br1  | 87.7(9)   | C4   | C5   | C6   | 121(3)    |
| P1   | Ni1  | Br1  | 169.9(3)  | C5   | C6   | C1   | 119(3)    |
| P2   | Ni1  | Br1  | 88.1(3)   | C12  | C8   | C9   | 106(3)    |
| C8   | Fe1  | C12  | 41.0(11)  | C12  | C8   | P1   | 129(2)    |
| C8   | Fe1  | C11  | 69.1(12)  | C9   | C8   | P1   | 125(2)    |
| C12  | Fe1  | C11  | 40.1(10)  | C12  | C8   | Fe1  | 70.4(17)  |
| C8   | Fe1  | C17  | 110.0(12) | C9   | C8   | Fe1  | 71.5(17)  |
| C12  | Fe1  | C17  | 111.6(12) | P1   | C8   | Fe1  | 126.0(16) |
| C11  | Fe1  | C17  | 139.3(11) | C8   | C9   | C10  | 110(3)    |
| C8   | Fe1  | C16  | 138.5(12) | C8   | C9   | Fe1  | 67.6(17)  |
| C12  | Fe1  | C16  | 111.9(12) | C10  | C9   | Fe1  | 70.4(17)  |
| C11  | Fe1  | C16  | 111.9(12) | C11  | C10  | C9   | 105(3)    |
| C17  | Fe1  | C16  | 40.8(11)  | C11  | C10  | Fe1  | 68.5(18)  |
| C8   | Fe1  | C9   | 40.9(11)  | C9   | C10  | Fe1  | 69.1(18)  |
| C12  | Fe1  | C9   | 67.2(11)  | C12  | C11  | C10  | 109(3)    |
| C11  | Fe1  | C9   | 67.4(12)  | C12  | C11  | Fe1  | 69.5(18)  |
| C17  | Fe1  | C9   | 139.3(12) | C10  | C11  | Fe1  | 70.9(18)  |
| C16  | Fe1  | C9   | 179.1(12) | C11  | C12  | C8   | 110(3)    |
| C8   | Fe1  | C13  | 110.3(12) | C11  | C12  | Fe1  | 70.4(17)  |
| C12  | Fe1  | C13  | 139.5(12) | C8   | C12  | Fe1  | 68.6(17)  |
| C11  | Fe1  | C13  | 179.5(12) | C14  | C13  | C17  | 108(3)    |
| C17  | Fe1  | C13  | 40.8(11)  | C14  | C13  | P2   | 128(2)    |
| C16  | Fe1  | C13  | 68.5(12)  | C17  | C13  | P2   | 123(2)    |
| C9   | Fe1  | C13  | 112.2(12) | C14  | C13  | Fe1  | 70.3(18)  |
| C8   | Fe1  | C14  | 138.6(12) | C17  | C13  | Fe1  | 69.5(17)  |
| C12  | Fe1  | C14  | 179.6(13) | P2   | C13  | Fe1  | 120.2(16) |
| C11  | Fe1  | C14  | 140.2(12) | C15  | C14  | C13  | 110(3)    |
| C17  | Fe1  | C14  | 68.2(12)  | C15  | C14  | Fe1  | 70.3(17)  |
| C16  | Fe1  | C14  | 68.2(12)  | C13  | C14  | Fe1  | 69.6(17)  |
| C9   | Fe1  | C14  | 112.7(12) | C14  | C15  | C16  | 107(3)    |

|     |     |     |           |     |     |     |          |
|-----|-----|-----|-----------|-----|-----|-----|----------|
| C13 | Fe1 | C14 | 40.2(11)  | C14 | C15 | Fe1 | 70.1(17) |
| C8  | Fe1 | C15 | 178.1(12) | C16 | C15 | Fe1 | 68.4(16) |
| C12 | Fe1 | C15 | 140.9(12) | C17 | C16 | C15 | 107(3)   |
| C11 | Fe1 | C15 | 112.5(12) | C17 | C16 | Fe1 | 69.6(17) |
| C17 | Fe1 | C15 | 69.5(12)  | C15 | C16 | Fe1 | 69.4(16) |
| C16 | Fe1 | C15 | 42.2(11)  | C16 | C17 | C13 | 108(3)   |
| C9  | Fe1 | C15 | 138.5(11) | C16 | C17 | Fe1 | 69.6(17) |
| C13 | Fe1 | C15 | 68.0(12)  | C13 | C17 | Fe1 | 69.7(17) |
| C14 | Fe1 | C15 | 39.5(10)  | C19 | C18 | C23 | 122(3)   |
| C8  | Fe1 | C10 | 69.8(12)  | C19 | C18 | P1  | 123(2)   |
| C12 | Fe1 | C10 | 68.2(12)  | C23 | C18 | P1  | 116(2)   |
| C11 | Fe1 | C10 | 40.6(11)  | C20 | C19 | C18 | 120(3)   |
| C17 | Fe1 | C10 | 179.8(13) | C19 | C20 | C21 | 118(3)   |
| C16 | Fe1 | C10 | 139.3(12) | C22 | C21 | C20 | 120(3)   |
| C9  | Fe1 | C10 | 40.5(11)  | C21 | C22 | C23 | 124(3)   |
| C13 | Fe1 | C10 | 139.3(12) | C22 | C23 | C18 | 115(3)   |
| C14 | Fe1 | C10 | 112.0(12) | C29 | C24 | C25 | 116(3)   |
| C15 | Fe1 | C10 | 110.7(12) | C29 | C24 | P1  | 122(2)   |
| C24 | P1  | C8  | 101.6(14) | C25 | C24 | P1  | 121(2)   |
| C24 | P1  | C18 | 105.7(14) | C26 | C25 | C24 | 122(3)   |
| C8  | P1  | C18 | 101.3(14) | C27 | C26 | C25 | 117(3)   |
| C24 | P1  | Ni1 | 109.3(11) | C26 | C27 | C28 | 122(3)   |
| C8  | P1  | Ni1 | 119.8(10) | C29 | C28 | C27 | 118(3)   |
| C18 | P1  | Ni1 | 117.3(10) | C24 | C29 | C28 | 124(3)   |
| C36 | P2  | C13 | 102.7(14) | C31 | C30 | C35 | 121(3)   |
| C36 | P2  | C30 | 106.7(14) | C31 | C30 | P2  | 118(2)   |
| C13 | P2  | C30 | 99.7(14)  | C35 | C30 | P2  | 121(2)   |
| C36 | P2  | Ni1 | 111.7(10) | C30 | C31 | C32 | 123(3)   |
| C13 | P2  | Ni1 | 124.7(10) | C31 | C32 | C33 | 116(3)   |
| C30 | P2  | Ni1 | 109.6(10) | C34 | C33 | C32 | 122(3)   |
| O2  | N1  | O1  | 123(3)    | C33 | C34 | C35 | 123(3)   |
| O2  | N1  | C4  | 117(3)    | C34 | C35 | C30 | 115(3)   |
| O1  | N1  | C4  | 121(3)    | C37 | C36 | C41 | 120(3)   |
| C2  | C1  | C6  | 116(3)    | C37 | C36 | P2  | 124(2)   |
| C2  | C1  | Ni1 | 123(2)    | C41 | C36 | P2  | 116(2)   |
| C6  | C1  | Ni1 | 120(2)    | C36 | C37 | C38 | 121(3)   |
| C1  | C2  | C3  | 123(3)    | C39 | C38 | C37 | 121(3)   |
| C1  | C2  | C7  | 123(3)    | C38 | C39 | C40 | 117(3)   |
| C3  | C2  | C7  | 114(3)    | C41 | C40 | C39 | 120(3)   |
| C4  | C3  | C2  | 114(3)    | C40 | C41 | C36 | 121(3)   |

*X-ray Diffraction Data for (dppf)Ni(2-methyl-4-trifluoromethylphenyl)(Br) (8)*

Crystals suitable for X-ray diffraction were grown from a concentrated solution of **8** in THF layered with pentane at -15 °C. Low-temperature diffraction data ( $\omega$ -scans) were collected on a Rigaku SCX Mini diffractometer coupled to a Rigaku Mercury275R CCD with Mo K $\alpha$  radiation ( $\lambda = 0.71073$  Å) for the structure of **8**. The diffraction images were processed and scaled using Rigaku Oxford Diffraction software.<sup>10</sup> The structure was solved with SHELXT and was refined against  $F^2$  on all data by full-matrix least squares with SHELXL.<sup>11</sup> All non-hydrogen atoms were refined anisotropically. Hydrogen atoms were included in the model at geometrically calculated positions and refined using a riding model. The isotropic displacement parameters of all hydrogen atoms were fixed to 1.2 times the U value of the atoms to which they are linked (1.5 times for methyl groups). The crystal diffracted poorly, resulting in a low  $I/\sigma$  and a high value of RInt. Nine reflections were omitted in which the Error/esd value was abnormally high. These reflections were located close to the beamstop. The full numbering scheme of compound **8** can be found in the full details of the X-ray structure determination (CIF), which is included as Supporting Information. CCDC number 1860568 contains the supplementary crystallographic data for this paper. These data can be obtained free of charge from The Cambridge Crystallographic Data Center via [www.ccdc.cam.ac.uk/data\\_request/cif](http://www.ccdc.cam.ac.uk/data_request/cif).

**Table S35.** Crystal data and structure refinement for **8**.

|                                  |                                                                      |
|----------------------------------|----------------------------------------------------------------------|
| Empirical formula                | C <sub>46</sub> H <sub>42</sub> BrF <sub>3</sub> FeNiOP <sub>2</sub> |
| Formula weight                   | 924.20                                                               |
| Temperature/K                    | 93.15                                                                |
| Crystal system                   | monoclinic                                                           |
| Space group                      | P2 <sub>1</sub> /c                                                   |
| a/Å                              | 12.3226(12)                                                          |
| b/Å                              | 15.3912(11)                                                          |
| c/Å                              | 20.3093(15)                                                          |
| $\alpha$ /°                      | 90                                                                   |
| $\beta$ /°                       | 93.380(8)                                                            |
| $\gamma$ /°                      | 90                                                                   |
| Volume/Å <sup>3</sup>            | 3845.2(5)                                                            |
| Z                                | 4                                                                    |
| $\rho_{\text{calc}}/\text{cm}^3$ | 1.596                                                                |
| $\mu/\text{mm}^{-1}$             | 2.041                                                                |
| F(000)                           | 1888.0                                                               |
| Crystal size/mm <sup>3</sup>     | 0.1 × 0.02 × 0.01                                                    |

|                                                  |                                                               |
|--------------------------------------------------|---------------------------------------------------------------|
| Radiation                                        | MoK $\alpha$ ( $\lambda = 0.71073$ )                          |
| 2 $\Theta$ range for data collection/ $^{\circ}$ | 5.356 to 50.052                                               |
| Index ranges                                     | $-14 \leq h \leq 14, -18 \leq k \leq 18, -24 \leq l \leq 24$  |
| Reflections collected                            | 54043                                                         |
| Independent reflections                          | 6796 [ $R_{\text{int}} = 0.2399, R_{\text{sigma}} = 0.1358$ ] |
| Data/restraints/parameters                       | 6796/0/497                                                    |
| Goodness-of-fit on $F^2$                         | 1.002                                                         |
| Final R indexes [ $I \geq 2\sigma(I)$ ]          | $R_1 = 0.0666, wR_2 = 0.1105$                                 |
| Final R indexes [all data]                       | $R_1 = 0.1379, wR_2 = 0.1321$                                 |

**Table S36.** Fractional Atomic Coordinates ( $\times 10^4$ ) and Equivalent Isotropic Displacement Parameters ( $\text{\AA}^2 \times 10^3$ ) for **8**.  $U_{\text{eq}}$  is defined as 1/3 of the trace of the orthogonalised  $U_{\text{ij}}$  tensor.

| Atom | <i>x</i>   | <i>y</i>   | <i>z</i>  | $U(\text{eq})$ |
|------|------------|------------|-----------|----------------|
| Br1  | 6662.3(7)  | 7930.0(4)  | 6887.7(3) | 30.4(2)        |
| Ni1  | 7056.7(8)  | 7285.0(5)  | 7905.4(4) | 19.8(2)        |
| Fe1  | 6984.3(8)  | 8007.0(6)  | 9889.0(4) | 22.4(3)        |
| P1   | 5917.5(16) | 8243.5(11) | 8372.0(8) | 21.5(4)        |
| P2   | 7697.0(15) | 6570.9(11) | 8752.1(8) | 19.3(4)        |
| F1   | 10210(6)   | 4194(4)    | 6722(2)   | 102(3)         |
| F2   | 10054(5)   | 4901(3)    | 5861(3)   | 80(2)          |
| F3   | 8940(5)    | 3976(4)    | 6085(3)   | 106(3)         |
| C1   | 7831(5)    | 6459(4)    | 7429(3)   | 17.8(15)       |
| C2   | 7312(6)    | 5727(4)    | 7185(3)   | 22.7(17)       |
| C3   | 7843(6)    | 5127(4)    | 6814(3)   | 26.4(17)       |
| C4   | 8896(6)    | 5266(4)    | 6682(3)   | 25.2(17)       |
| C4   | 9474(6)    | 7421(4)    | 7487(3)   | 29.4(18)       |
| C5   | 9526(7)    | 4616(5)    | 6336(4)   | 37(2)          |
| C6   | 9431(6)    | 6002(4)    | 6914(3)   | 25.5(17)       |
| C7   | 8906(6)    | 6616(4)    | 7279(3)   | 21.3(16)       |
| C8   | 4503(6)    | 8166(4)    | 8039(3)   | 21.4(16)       |
| C9   | 3693(6)    | 7796(4)    | 8386(3)   | 25.7(17)       |
| C10  | 2639(6)    | 7788(4)    | 8132(4)   | 29.0(18)       |
| C11  | 2379(6)    | 8144(4)    | 7520(4)   | 27.5(18)       |
| C12  | 3188(6)    | 8499(4)    | 7168(3)   | 27.5(18)       |
| C13  | 4244(6)    | 8519(4)    | 7426(3)   | 25.6(17)       |
| C14  | 6199(6)    | 9375(4)    | 8194(3)   | 22.2(17)       |
| C15  | 5436(6)    | 9997(4)    | 8313(3)   | 25.4(17)       |
| C16  | 5627(7)    | 10856(4)   | 8162(3)   | 29.2(19)       |
| C17  | 6562(7)    | 11081(4)   | 7899(3)   | 32.2(19)       |
| C18  | 7345(7)    | 10473(5)   | 7789(3)   | 35(2)          |
| C19  | 7155(6)    | 9604(4)    | 7945(3)   | 27.2(18)       |
| C20  | 8953(6)    | 5956(4)    | 8723(3)   | 24.0(17)       |

|     |          |         |          |          |
|-----|----------|---------|----------|----------|
| C21 | 9919(6)  | 6322(5) | 8944(3)  | 29.6(18) |
| C22 | 10882(6) | 5863(5) | 8910(3)  | 33.7(19) |
| C23 | 10881(7) | 5045(5) | 8657(4)  | 37(2)    |
| C24 | 9927(7)  | 4679(5) | 8435(3)  | 37(2)    |
| C25 | 8949(6)  | 5127(4) | 8464(3)  | 25.4(17) |
| C26 | 6727(6)  | 5756(4) | 8965(3)  | 21.9(17) |
| C27 | 6971(6)  | 5124(4) | 9434(3)  | 22.4(17) |
| C28 | 6207(7)  | 4504(4) | 9562(4)  | 31.5(19) |
| C29 | 5209(7)  | 4491(4) | 9228(4)  | 35(2)    |
| C30 | 4972(6)  | 5108(4) | 8756(3)  | 27.0(18) |
| C31 | 5731(6)  | 5737(4) | 8627(3)  | 22.1(17) |
| C32 | 5749(6)  | 8295(4) | 9248(3)  | 21.4(17) |
| C33 | 5473(6)  | 7598(4) | 9659(3)  | 24.0(17) |
| C34 | 5536(6)  | 7890(4) | 10318(3) | 26.7(17) |
| C35 | 5881(6)  | 8768(4) | 10314(3) | 30.5(19) |
| C36 | 5993(6)  | 9015(4) | 9664(3)  | 26.6(18) |
| C37 | 8300(6)  | 7744(4) | 10512(3) | 27.1(17) |
| C38 | 7975(6)  | 7012(4) | 10146(3) | 24.4(17) |
| C39 | 8000(5)  | 7212(4) | 9466(3)  | 18.7(15) |
| C40 | 8373(6)  | 8092(4) | 9427(3)  | 26.5(18) |
| C41 | 8541(6)  | 8395(5) | 10075(3) | 33.3(19) |
| O1  | 7761(7)  | 2349(6) | 5080(3)  | 94(3)    |
| C42 | 7323(9)  | 3205(9) | 4915(7)  | 120(6)   |
| C43 | 8145(10) | 3615(9) | 4513(5)  | 106(5)   |
| C44 | 8571(10) | 2848(9) | 4153(6)  | 101(5)   |
| C45 | 8513(11) | 2088(8) | 4578(5)  | 115(5)   |

**Table S37.** Anisotropic Displacement Parameters ( $\text{\AA}^2 \times 10^3$ ) for **8**. The Anisotropic displacement factor exponent takes the form:  $-2\pi^2[h^2a^{*2}U_{11}+2hka^*b^*U_{12}+\dots]$ .

| Atom | U <sub>11</sub> | U <sub>22</sub> | U <sub>33</sub> | U <sub>23</sub> | U <sub>13</sub> | U <sub>12</sub> |
|------|-----------------|-----------------|-----------------|-----------------|-----------------|-----------------|
| Br1  | 49.2(6)         | 27.0(4)         | 14.7(4)         | 1.6(3)          | 0.6(3)          | 14.3(4)         |
| Ni1  | 31.1(6)         | 13.7(4)         | 14.3(4)         | -0.1(4)         | -0.8(4)         | 1.0(4)          |
| Fe1  | 34.9(7)         | 18.3(5)         | 14.2(5)         | -0.5(4)         | 1.6(5)          | -0.2(5)         |
| P1   | 35.6(13)        | 13.8(9)         | 14.9(9)         | 1.5(7)          | 1.1(9)          | 1.3(8)          |
| P2   | 28.1(12)        | 12.8(9)         | 16.8(9)         | -0.4(7)         | -0.2(8)         | -1.7(8)         |
| F1   | 150(6)          | 111(5)          | 44(3)           | 0(3)            | 3(4)            | 109(5)          |
| F2   | 138(5)          | 32(3)           | 79(4)           | 24(3)           | 87(4)           | 36(3)           |
| F3   | 93(5)           | 70(4)           | 163(7)          | -78(4)          | 71(5)           | -19(4)          |
| C1   | 20(4)           | 15(3)           | 18(4)           | 7(3)            | 0(3)            | 1(3)            |
| C2   | 25(5)           | 24(4)           | 19(4)           | 3(3)            | -1(3)           | 3(3)            |
| C3   | 30(5)           | 25(4)           | 24(4)           | -3(3)           | 0(4)            | 0(3)            |
| C4   | 40(5)           | 23(4)           | 12(4)           | 3(3)            | 4(3)            | 8(4)            |

|     |         |         |         |        |        |         |
|-----|---------|---------|---------|--------|--------|---------|
| C4  | 25(5)   | 32(4)   | 32(4)   | -3(3)  | 5(4)   | -3(3)   |
| C5  | 59(6)   | 21(4)   | 30(5)   | 7(4)   | 5(4)   | 10(4)   |
| C6  | 23(5)   | 32(4)   | 22(4)   | 10(3)  | 2(3)   | -1(3)   |
| C7  | 34(5)   | 13(4)   | 17(4)   | 3(3)   | -1(3)  | 2(3)    |
| C8  | 33(5)   | 14(4)   | 17(4)   | 2(3)   | 2(3)   | 4(3)    |
| C9  | 38(5)   | 13(4)   | 25(4)   | 7(3)   | 0(4)   | -2(3)   |
| C10 | 31(5)   | 17(4)   | 40(5)   | -1(3)  | 13(4)  | -3(3)   |
| C11 | 19(4)   | 23(4)   | 40(5)   | -2(3)  | -2(4)  | 1(3)    |
| C12 | 40(5)   | 17(4)   | 25(4)   | -1(3)  | -4(4)  | 6(4)    |
| C13 | 34(5)   | 21(4)   | 22(4)   | -2(3)  | 3(4)   | 8(3)    |
| C14 | 38(5)   | 13(4)   | 16(4)   | 2(3)   | 9(3)   | 0(3)    |
| C15 | 36(5)   | 16(4)   | 24(4)   | 0(3)   | -1(3)  | 0(3)    |
| C16 | 44(6)   | 24(4)   | 19(4)   | -3(3)  | -3(4)  | 6(4)    |
| C17 | 51(6)   | 17(4)   | 29(4)   | 3(3)   | 1(4)   | 1(4)    |
| C18 | 51(6)   | 36(5)   | 17(4)   | 3(3)   | 3(4)   | -14(4)  |
| C19 | 33(5)   | 20(4)   | 28(4)   | -3(3)  | 4(4)   | 0(3)    |
| C20 | 38(5)   | 18(4)   | 17(4)   | 1(3)   | 5(3)   | 3(3)    |
| C21 | 37(5)   | 29(4)   | 22(4)   | -1(3)  | -5(4)  | -6(4)   |
| C22 | 26(5)   | 46(5)   | 29(4)   | 9(4)   | 1(4)   | -6(4)   |
| C23 | 41(6)   | 40(5)   | 31(5)   | 2(4)   | -1(4)  | 14(4)   |
| C24 | 61(7)   | 26(4)   | 26(4)   | 3(3)   | 10(4)  | 14(4)   |
| C25 | 28(5)   | 23(4)   | 25(4)   | -1(3)  | 3(3)   | 1(3)    |
| C26 | 31(5)   | 16(4)   | 18(4)   | -5(3)  | -1(3)  | -6(3)   |
| C27 | 28(5)   | 15(4)   | 23(4)   | -2(3)  | 4(3)   | 5(3)    |
| C28 | 50(6)   | 17(4)   | 29(4)   | 0(3)   | 14(4)  | 6(4)    |
| C29 | 52(6)   | 17(4)   | 37(5)   | -7(3)  | 18(5)  | -8(4)   |
| C30 | 30(5)   | 24(4)   | 27(4)   | -14(3) | 7(4)   | -3(3)   |
| C31 | 38(5)   | 9(3)    | 20(4)   | -7(3)  | 7(4)   | -2(3)   |
| C32 | 32(5)   | 13(3)   | 20(4)   | 1(3)   | 4(3)   | 1(3)    |
| C33 | 24(4)   | 23(4)   | 25(4)   | 2(3)   | 9(3)   | 7(3)    |
| C34 | 35(5)   | 31(4)   | 14(4)   | 6(3)   | 5(3)   | 4(4)    |
| C35 | 47(6)   | 28(4)   | 17(4)   | -2(3)  | 3(4)   | 11(4)   |
| C36 | 35(5)   | 20(4)   | 25(4)   | 0(3)   | 1(4)   | 0(3)    |
| C37 | 30(5)   | 32(4)   | 18(4)   | -2(3)  | -3(3)  | -3(4)   |
| C38 | 36(5)   | 23(4)   | 14(3)   | 2(3)   | -3(3)  | -5(3)   |
| C39 | 17(4)   | 21(4)   | 18(4)   | 0(3)   | -2(3)  | 1(3)    |
| C40 | 35(5)   | 28(4)   | 17(4)   | -2(3)  | 6(3)   | -8(3)   |
| C41 | 37(5)   | 28(4)   | 35(5)   | -12(4) | 8(4)   | -12(4)  |
| O1  | 113(7)  | 113(7)  | 57(5)   | 26(5)  | 5(5)   | -43(5)  |
| C42 | 52(8)   | 154(13) | 149(13) | 87(11) | -27(8) | -31(8)  |
| C43 | 130(12) | 151(13) | 34(6)   | 39(7)  | -4(7)  | -88(10) |
| C44 | 94(10)  | 142(12) | 65(8)   | 39(8)  | -15(7) | -58(9)  |



C45 157(14) 146(13) 41(7) 39(8) -13(8) -49(11)

**Table S38.** Bond Lengths for **8**.

| Atom | Atom | Length/Å   | Atom | Atom | Length/Å  |
|------|------|------------|------|------|-----------|
| Br1  | Ni1  | 2.3185(10) | C11  | C12  | 1.375(9)  |
| Ni1  | P1   | 2.281(2)   | C12  | C13  | 1.374(9)  |
| Ni1  | P2   | 2.1512(19) | C14  | C15  | 1.373(9)  |
| Ni1  | C1   | 1.890(6)   | C14  | C19  | 1.356(9)  |
| Fe1  | C32  | 1.994(7)   | C15  | C16  | 1.382(9)  |
| Fe1  | C33  | 1.995(7)   | C16  | C17  | 1.343(10) |
| Fe1  | C34  | 2.040(7)   | C17  | C18  | 1.372(10) |
| Fe1  | C35  | 2.026(7)   | C18  | C19  | 1.398(9)  |
| Fe1  | C36  | 2.010(7)   | C20  | C21  | 1.369(9)  |
| Fe1  | C37  | 2.038(7)   | C20  | C25  | 1.379(9)  |
| Fe1  | C38  | 2.008(7)   | C21  | C22  | 1.387(10) |
| Fe1  | C39  | 1.983(6)   | C22  | C23  | 1.358(10) |
| Fe1  | C40  | 2.004(7)   | C23  | C24  | 1.357(10) |
| Fe1  | C41  | 2.024(7)   | C24  | C25  | 1.393(9)  |
| P1   | C8   | 1.837(7)   | C26  | C27  | 1.382(8)  |
| P1   | C14  | 1.816(6)   | C26  | C31  | 1.370(9)  |
| P1   | C32  | 1.804(6)   | C27  | C28  | 1.376(9)  |
| P2   | C20  | 1.818(7)   | C28  | C29  | 1.369(10) |
| P2   | C26  | 1.802(7)   | C29  | C30  | 1.368(9)  |
| P2   | C39  | 1.775(6)   | C30  | C31  | 1.381(9)  |
| F1   | C5   | 1.292(8)   | C32  | C33  | 1.413(8)  |
| F2   | C5   | 1.272(8)   | C32  | C36  | 1.416(8)  |
| F3   | C5   | 1.307(9)   | C33  | C34  | 1.409(9)  |
| C1   | C2   | 1.373(9)   | C34  | C35  | 1.418(9)  |
| C1   | C7   | 1.396(9)   | C35  | C36  | 1.388(9)  |
| C2   | C3   | 1.381(9)   | C37  | C38  | 1.394(9)  |
| C3   | C4   | 1.357(9)   | C37  | C41  | 1.383(9)  |
| C4   | C5   | 1.472(9)   | C38  | C39  | 1.417(8)  |
| C4   | C6   | 1.380(9)   | C39  | C40  | 1.434(8)  |
| C4   | C7   | 1.473(9)   | C40  | C41  | 1.400(9)  |
| C6   | C7   | 1.385(9)   | O1   | C42  | 1.455(13) |
| C8   | C9   | 1.378(9)   | O1   | C45  | 1.473(13) |
| C8   | C13  | 1.378(8)   | C42  | C43  | 1.480(13) |
| C9   | C10  | 1.370(9)   | C43  | C44  | 1.500(15) |
| C10  | C11  | 1.378(9)   | C44  | C45  | 1.458(13) |

**Table S39.** Bond Angles for **8**.

| <b>Atom</b> | <b>Atom</b> | <b>Atom</b> | <b>Angle/°</b> | <b>Atom</b> | <b>Atom</b> | <b>Atom</b> | <b>Angle/°</b> |
|-------------|-------------|-------------|----------------|-------------|-------------|-------------|----------------|
| P1          | Ni1         | Br1         | 89.52(5)       | C4          | C6          | C7          | 120.9(7)       |
| P2          | Ni1         | Br1         | 168.27(7)      | C1          | C7          | C4          | 121.6(6)       |
| P2          | Ni1         | P1          | 101.77(7)      | C6          | C7          | C1          | 118.5(6)       |
| C1          | Ni1         | Br1         | 85.24(18)      | C6          | C7          | C4          | 119.9(7)       |
| C1          | Ni1         | P1          | 171.7(2)       | C9          | C8          | P1          | 122.6(5)       |
| C1          | Ni1         | P2          | 83.87(19)      | C13         | C8          | P1          | 118.1(5)       |
| C32         | Fe1         | C33         | 41.5(2)        | C13         | C8          | C9          | 119.3(7)       |
| C32         | Fe1         | C34         | 69.2(3)        | C10         | C9          | C8          | 120.7(6)       |
| C32         | Fe1         | C35         | 69.2(3)        | C9          | C10         | C11         | 120.1(7)       |
| C32         | Fe1         | C36         | 41.4(2)        | C12         | C11         | C10         | 119.3(7)       |
| C32         | Fe1         | C37         | 177.0(3)       | C13         | C12         | C11         | 120.6(7)       |
| C32         | Fe1         | C38         | 140.2(3)       | C12         | C13         | C8          | 120.0(7)       |
| C32         | Fe1         | C40         | 108.7(3)       | C15         | C14         | P1          | 119.5(5)       |
| C32         | Fe1         | C41         | 137.3(3)       | C19         | C14         | P1          | 120.3(5)       |
| C33         | Fe1         | C34         | 40.9(2)        | C19         | C14         | C15         | 120.2(6)       |
| C33         | Fe1         | C35         | 69.0(3)        | C14         | C15         | C16         | 120.1(7)       |
| C33         | Fe1         | C36         | 69.2(3)        | C17         | C16         | C15         | 119.7(7)       |
| C33         | Fe1         | C37         | 141.3(3)       | C16         | C17         | C18         | 121.2(7)       |
| C33         | Fe1         | C38         | 111.4(3)       | C17         | C18         | C19         | 119.1(7)       |
| C33         | Fe1         | C40         | 136.2(3)       | C14         | C19         | C18         | 119.6(7)       |
| C33         | Fe1         | C41         | 176.9(3)       | C21         | C20         | P2          | 120.0(5)       |
| C35         | Fe1         | C34         | 40.8(3)        | C21         | C20         | C25         | 119.3(7)       |
| C35         | Fe1         | C37         | 112.3(3)       | C25         | C20         | P2          | 120.7(6)       |
| C36         | Fe1         | C34         | 68.3(3)        | C20         | C21         | C22         | 120.2(7)       |
| C36         | Fe1         | C35         | 40.2(2)        | C23         | C22         | C21         | 120.6(7)       |
| C36         | Fe1         | C37         | 138.1(3)       | C24         | C23         | C22         | 119.5(8)       |
| C36         | Fe1         | C41         | 111.8(3)       | C23         | C24         | C25         | 121.0(7)       |
| C37         | Fe1         | C34         | 113.6(3)       | C20         | C25         | C24         | 119.4(7)       |
| C38         | Fe1         | C34         | 110.8(3)       | C27         | C26         | P2          | 122.3(6)       |
| C38         | Fe1         | C35         | 138.0(3)       | C31         | C26         | P2          | 118.9(5)       |
| C38         | Fe1         | C36         | 178.0(3)       | C31         | C26         | C27         | 118.8(6)       |
| C38         | Fe1         | C37         | 40.3(2)        | C28         | C27         | C26         | 119.6(7)       |
| C38         | Fe1         | C41         | 67.7(3)        | C29         | C28         | C27         | 121.4(7)       |
| C39         | Fe1         | C32         | 109.4(3)       | C30         | C29         | C28         | 119.0(7)       |
| C39         | Fe1         | C33         | 107.9(3)       | C29         | C30         | C31         | 120.0(7)       |
| C39         | Fe1         | C34         | 136.1(3)       | C26         | C31         | C30         | 121.1(7)       |
| C39         | Fe1         | C35         | 176.8(3)       | P1          | C32         | Fe1         | 120.4(4)       |
| C39         | Fe1         | C36         | 140.3(3)       | C33         | C32         | Fe1         | 69.3(4)        |
| C39         | Fe1         | C37         | 69.3(3)        | C33         | C32         | P1          | 126.5(5)       |
| C39         | Fe1         | C38         | 41.6(2)        | C33         | C32         | C36         | 106.9(6)       |

|     |     |     |          |     |     |     |           |
|-----|-----|-----|----------|-----|-----|-----|-----------|
| C39 | Fe1 | C40 | 42.2(2)  | C36 | C32 | Fe1 | 69.9(4)   |
| C39 | Fe1 | C41 | 69.3(3)  | C36 | C32 | P1  | 126.2(5)  |
| C40 | Fe1 | C34 | 177.1(3) | C32 | C33 | Fe1 | 69.2(4)   |
| C40 | Fe1 | C35 | 140.8(3) | C34 | C33 | Fe1 | 71.3(4)   |
| C40 | Fe1 | C36 | 111.6(3) | C34 | C33 | C32 | 108.5(6)  |
| C40 | Fe1 | C37 | 68.5(3)  | C33 | C34 | Fe1 | 67.9(4)   |
| C40 | Fe1 | C38 | 69.4(3)  | C33 | C34 | C35 | 107.4(6)  |
| C40 | Fe1 | C41 | 40.7(3)  | C35 | C34 | Fe1 | 69.1(4)   |
| C41 | Fe1 | C34 | 142.2(3) | C34 | C35 | Fe1 | 70.1(4)   |
| C41 | Fe1 | C35 | 113.7(3) | C36 | C35 | Fe1 | 69.3(4)   |
| C41 | Fe1 | C37 | 39.8(3)  | C36 | C35 | C34 | 108.2(6)  |
| C8  | P1  | Ni1 | 113.5(2) | C32 | C36 | Fe1 | 68.7(4)   |
| C14 | P1  | Ni1 | 114.1(2) | C35 | C36 | Fe1 | 70.5(4)   |
| C14 | P1  | C8  | 100.2(3) | C35 | C36 | C32 | 109.0(6)  |
| C32 | P1  | Ni1 | 123.2(2) | C38 | C37 | Fe1 | 68.7(4)   |
| C32 | P1  | C8  | 101.8(3) | C41 | C37 | Fe1 | 69.5(4)   |
| C32 | P1  | C14 | 100.9(3) | C41 | C37 | C38 | 108.0(6)  |
| C20 | P2  | Ni1 | 120.8(2) | C37 | C38 | Fe1 | 71.0(4)   |
| C26 | P2  | Ni1 | 109.2(2) | C37 | C38 | C39 | 108.8(6)  |
| C26 | P2  | C20 | 102.9(3) | C39 | C38 | Fe1 | 68.2(4)   |
| C39 | P2  | Ni1 | 114.8(2) | P2  | C39 | Fe1 | 126.1(4)  |
| C39 | P2  | C20 | 100.2(3) | C38 | C39 | Fe1 | 70.2(4)   |
| C39 | P2  | C26 | 107.6(3) | C38 | C39 | P2  | 131.3(5)  |
| C2  | C1  | Ni1 | 119.8(5) | C38 | C39 | C40 | 106.5(5)  |
| C2  | C1  | C7  | 119.4(6) | C40 | C39 | Fe1 | 69.7(4)   |
| C7  | C1  | Ni1 | 120.6(5) | C40 | C39 | P2  | 122.2(5)  |
| C1  | C2  | C3  | 121.3(7) | C39 | C40 | Fe1 | 68.1(4)   |
| C4  | C3  | C2  | 119.4(7) | C41 | C40 | Fe1 | 70.4(4)   |
| C3  | C4  | C5  | 121.7(7) | C41 | C40 | C39 | 107.0(6)  |
| C3  | C4  | C6  | 120.4(6) | C37 | C41 | Fe1 | 70.6(4)   |
| C6  | C4  | C5  | 117.8(7) | C37 | C41 | C40 | 109.7(6)  |
| F1  | C5  | F3  | 100.6(7) | C40 | C41 | Fe1 | 68.9(4)   |
| F1  | C5  | C4  | 113.3(6) | C42 | O1  | C45 | 109.1(8)  |
| F2  | C5  | F1  | 106.9(8) | O1  | C42 | C43 | 104.9(11) |
| F2  | C5  | F3  | 105.0(7) | C42 | C43 | C44 | 101.8(11) |
| F2  | C5  | C4  | 115.8(6) | C45 | C44 | C43 | 108.2(10) |
| F3  | C5  | C4  | 113.8(7) | C44 | C45 | O1  | 104.2(11) |

*X-ray Diffraction Data for (dppf)Ni(2-methyl-5-trifluoromethylphenyl)(Br) (10)*

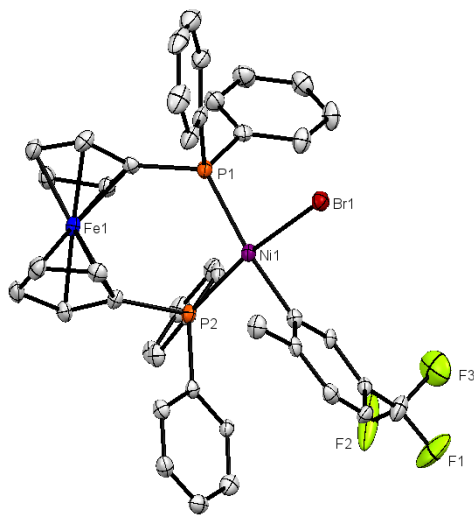

**Figure S60.** ORTEP of **10**, with ellipsoids shown at 50% probability. Hydrogen atoms and solvent of crystallization have been removed for clarity.

Crystals suitable for X-ray diffraction were grown from a concentrated solution of **10** in THF layered with pentane at  $-15\text{ }^{\circ}\text{C}$ . Low-temperature diffraction data ( $\omega$ -scans) were collected on a Rigaku SCX Mini diffractometer coupled to a Rigaku Mercury275R CCD with Mo  $K\alpha$  radiation ( $\lambda = 0.71073\text{ \AA}$ ) for the structure of **10** (Figure S60). The diffraction images were processed and scaled using Rigaku Oxford Diffraction software.<sup>10</sup> The structure was solved with SHELXT and was refined against  $F^2$  on all data by full-matrix least squares with SHELXL.<sup>11</sup> All non-hydrogen atoms were refined anisotropically. Hydrogen atoms were included in the model at geometrically calculated positions and refined using a riding model. The isotropic displacement parameters of all hydrogen atoms were fixed to 1.2 times the U value of the atoms to which they are linked (1.5 times for methyl groups). There is disorder in the position of the fluorine atoms that was not modelled in the refinement, as the model did not result in an improved fit of the data. The THF solvent in the crystal lattice lies on a special position, and only half of the molecule is present in the asymmetric unit. Six reflections were omitted in which the Error/esd value was abnormally high. These reflections were located close to the beamstop. The full numbering scheme of compound **10** can be found in the full details of the X-ray structure determination (CIF), which is included as Supporting Information. CCDC number 1860570 contains the supplementary crystallographic data for this paper. These data can be obtained free of charge from The Cambridge Crystallographic Data Center via [www.ccdc.cam.ac.uk/data\\_request/cif](http://www.ccdc.cam.ac.uk/data_request/cif).

**Table S40.** Crystal data and structure refinement for **10**.

|                                      |                                                                                      |
|--------------------------------------|--------------------------------------------------------------------------------------|
| Empirical formula                    | C <sub>44</sub> H <sub>38</sub> BrF <sub>3</sub> FeNiO <sub>0.5</sub> P <sub>2</sub> |
| Formula weight                       | 888.15                                                                               |
| Temperature/K                        | 93.15                                                                                |
| Crystal system                       | monoclinic                                                                           |
| Space group                          | I2/a                                                                                 |
| a/Å                                  | 18.5727(8)                                                                           |
| b/Å                                  | 9.4426(4)                                                                            |
| c/Å                                  | 42.528(2)                                                                            |
| α/°                                  | 90                                                                                   |
| β/°                                  | 93.412(4)                                                                            |
| γ/°                                  | 90                                                                                   |
| Volume/Å <sup>3</sup>                | 7445.1(6)                                                                            |
| Z                                    | 8                                                                                    |
| ρ <sub>calc</sub> /g/cm <sup>3</sup> | 1.585                                                                                |
| μ/mm <sup>-1</sup>                   | 2.104                                                                                |
| F(000)                               | 3616.0                                                                               |
| Crystal size/mm <sup>3</sup>         | 0.1 × 0.05 × 0.03                                                                    |
| Radiation                            | MoKα (λ = 0.71073)                                                                   |
| 2θ range for data collection/°       | 5.16 to 50.05                                                                        |
| Index ranges                         | -22 ≤ h ≤ 22, -11 ≤ k ≤ 11, -50 ≤ l ≤ 50                                             |
| Reflections collected                | 52026                                                                                |
| Independent reflections              | 6581 [R <sub>int</sub> = 0.1044, R <sub>sigma</sub> = 0.0541]                        |
| Data/restraints/parameters           | 6581/0/475                                                                           |
| Goodness-of-fit on F <sup>2</sup>    | 1.012                                                                                |
| Final R indexes [I ≥ 2σ (I)]         | R <sub>1</sub> = 0.0457, wR <sub>2</sub> = 0.1167                                    |
| Final R indexes [all data]           | R <sub>1</sub> = 0.0715, wR <sub>2</sub> = 0.1334                                    |

**Table S41.** Fractional Atomic Coordinates (×10<sup>4</sup>) and Equivalent Isotropic Displacement Parameters (Å<sup>2</sup>×10<sup>3</sup>) for **10**. U<sub>eq</sub> is defined as 1/3 of the trace of the orthogonalised U<sub>ij</sub> tensor.

| Atom | x          | y          | z          | U(eq)     |
|------|------------|------------|------------|-----------|
| Br1  | 2989.1(2)  | 2158.3(5)  | 3957.7(2)  | 20.49(14) |
| Ni1  | 3996.9(3)  | 2793.7(6)  | 3688.4(2)  | 14.89(16) |
| Fe1  | 5647.3(3)  | 5787.6(6)  | 3834.2(2)  | 17.76(17) |
| P1   | 4591.5(6)  | 3385.1(12) | 4149.3(3)  | 17.7(3)   |
| P2   | 4779.9(6)  | 3395.4(11) | 3364.8(3)  | 14.7(3)   |
| F1   | 3135(2)    | -1896(4)   | 2641.4(9)  | 63.1(11)  |
| F2   | 4206.1(19) | -1451(4)   | 2813.6(13) | 91.1(17)  |
| F3   | 3466(2)    | -2335(3)   | 3102.2(9)  | 57.8(10)  |
| O1   | 7500       | 387(6)     | 5000       | 42.5(14)  |

|     |         |          |            |          |
|-----|---------|----------|------------|----------|
| C1  | 3506(2) | 2012(4)  | 3327.6(10) | 17.0(9)  |
| C2  | 3665(2) | 656(4)   | 3236.0(10) | 16.1(9)  |
| C3  | 3313(2) | 46(4)    | 2974.8(10) | 17.4(10) |
| C4  | 2783(2) | 782(5)   | 2805.5(11) | 21.2(10) |
| C5  | 2613(2) | 2122(5)  | 2899.8(10) | 20.2(10) |
| C6  | 2967(2) | 2756(5)  | 3156.1(10) | 17.3(9)  |
| C7  | 3534(3) | -1366(5) | 2874.4(12) | 29.0(12) |
| C8  | 2785(2) | 4235(5)  | 3246.5(11) | 24.1(11) |
| C9  | 4542(2) | 3518(5)  | 2948.1(10) | 15.3(9)  |
| C10 | 4574(2) | 2357(5)  | 2747.7(10) | 16.9(9)  |
| C11 | 4382(2) | 2482(5)  | 2434.2(11) | 22.3(10) |
| C12 | 4149(2) | 3753(5)  | 2311.0(11) | 21.9(10) |
| C13 | 4111(2) | 4902(5)  | 2504.0(11) | 22.4(10) |
| C14 | 4311(2) | 4793(5)  | 2819.6(10) | 18.1(10) |
| C15 | 5554(2) | 2228(4)  | 3384.3(10) | 16.7(9)  |
| C16 | 6088(2) | 2370(5)  | 3174.3(11) | 20.5(10) |
| C17 | 6712(2) | 1592(5)  | 3212.2(11) | 22.6(10) |
| C18 | 6810(3) | 657(5)   | 3457.0(12) | 25.3(11) |
| C19 | 6273(2) | 486(5)   | 3663.0(11) | 23.6(11) |
| C20 | 5646(2) | 1265(4)  | 3625.8(11) | 19.8(10) |
| C21 | 4053(2) | 4397(5)  | 4410.9(11) | 23.2(11) |
| C22 | 4160(3) | 4303(5)  | 4732.9(11) | 27.5(11) |
| C23 | 3807(3) | 5207(6)  | 4924.9(13) | 36.2(13) |
| C24 | 3350(3) | 6214(6)  | 4793.7(13) | 37.0(14) |
| C25 | 3233(3) | 6306(6)  | 4474.2(13) | 33.9(13) |
| C26 | 3582(2) | 5387(5)  | 4279.6(12) | 27.0(11) |
| C27 | 4888(3) | 1816(5)  | 4369.1(10) | 20.9(10) |
| C28 | 4505(2) | 570(5)   | 4334.0(12) | 25.7(11) |
| C29 | 4734(3) | -646(5)  | 4485.5(12) | 29.7(12) |
| C30 | 5361(3) | -648(5)  | 4672.7(12) | 29.0(12) |
| C31 | 5754(3) | 573(5)   | 4708.7(12) | 30.4(12) |
| C32 | 5521(3) | 1797(5)  | 4556.6(11) | 27.2(11) |
| C33 | 5400(2) | 4458(5)  | 4176.2(10) | 16.4(9)  |
| C34 | 5436(2) | 5876(5)  | 4293.5(11) | 23.3(10) |
| C35 | 6129(3) | 6393(5)  | 4255.4(11) | 24.7(11) |
| C36 | 6535(2) | 5328(5)  | 4121.0(11) | 23.5(10) |
| C37 | 6089(2) | 4136(5)  | 4073.7(10) | 20.4(10) |
| C38 | 5148(2) | 5123(4)  | 3432.8(10) | 16.3(9)  |
| C39 | 5849(2) | 5624(5)  | 3375.2(10) | 20.8(10) |
| C40 | 5894(3) | 7059(5)  | 3467.4(11) | 22.7(10) |
| C41 | 5232(3) | 7446(5)  | 3579.9(11) | 25.2(11) |
| C42 | 4767(2) | 6275(5)  | 3560.4(10) | 21.5(10) |

|     |         |          |            |          |
|-----|---------|----------|------------|----------|
| C43 | 7629(3) | -505(7)  | 4734.6(12) | 42.4(15) |
| C44 | 7493(6) | -1965(7) | 4838.9(15) | 76(3)    |

**Table S42.** Anisotropic Displacement Parameters ( $\text{\AA}^2 \times 10^3$ ) for **10**. The Anisotropic displacement factor exponent takes the form:  $-2\pi^2[h^2a^{*2}U_{11}+2hka^*b^*U_{12}+\dots]$ .

| Atom | U <sub>11</sub> | U <sub>22</sub> | U <sub>33</sub> | U <sub>23</sub> | U <sub>13</sub> | U <sub>12</sub> |
|------|-----------------|-----------------|-----------------|-----------------|-----------------|-----------------|
| Br1  | 16.7(2)         | 21.9(3)         | 23.3(3)         | -2.81(18)       | 4.70(19)        | -2.67(18)       |
| Ni1  | 13.0(3)         | 13.0(3)         | 18.9(3)         | -1.9(2)         | 2.5(2)          | -1.1(2)         |
| Fe1  | 17.5(3)         | 12.4(3)         | 23.3(4)         | -1.6(3)         | 0.6(3)          | -1.9(3)         |
| P1   | 17.2(6)         | 15.3(6)         | 20.8(6)         | -2.3(5)         | 2.6(5)          | -3.2(5)         |
| P2   | 13.6(5)         | 11.0(6)         | 19.7(6)         | -1.6(4)         | 1.7(5)          | -0.1(4)         |
| F1   | 78(3)           | 39(2)           | 69(3)           | -33.9(18)       | -25(2)          | 10.7(19)        |
| F2   | 39(2)           | 45(2)           | 196(5)          | -69(3)          | 61(3)           | -20.2(18)       |
| F3   | 80(3)           | 23.6(18)        | 72(3)           | 2.0(17)         | 16(2)           | 14.5(18)        |
| O1   | 35(3)           | 51(4)           | 42(3)           | 0               | 4(3)            | 0               |
| C1   | 15(2)           | 15(2)           | 21(2)           | 0.8(18)         | 2.7(19)         | -1.6(18)        |
| C2   | 10(2)           | 15(2)           | 23(2)           | -0.8(18)        | 2.2(18)         | -3.4(18)        |
| C3   | 17(2)           | 14(2)           | 22(2)           | -1.4(18)        | 4.7(19)         | -3.7(18)        |
| C4   | 20(2)           | 24(3)           | 19(2)           | -5.4(19)        | -0.9(19)        | -7(2)           |
| C5   | 13(2)           | 24(3)           | 23(2)           | 5(2)            | 0.1(19)         | -1.8(19)        |
| C6   | 13(2)           | 16(2)           | 23(2)           | 0.7(18)         | 4.9(19)         | -4.2(18)        |
| C7   | 23(3)           | 24(3)           | 40(3)           | -13(2)          | 2(2)            | -6(2)           |
| C8   | 21(2)           | 19(3)           | 32(3)           | 0(2)            | 0(2)            | 2(2)            |
| C9   | 11(2)           | 16(2)           | 19(2)           | 0.6(18)         | 0.7(18)         | -2.0(18)        |
| C10  | 15(2)           | 15(2)           | 20(2)           | -2.2(18)        | 3.3(18)         | -3.8(18)        |
| C11  | 16(2)           | 25(3)           | 27(3)           | -6(2)           | 5(2)            | 0(2)            |
| C12  | 15(2)           | 31(3)           | 20(2)           | 1(2)            | 0.4(19)         | -2(2)           |
| C13  | 20(2)           | 20(2)           | 27(3)           | 5(2)            | 0(2)            | -3(2)           |
| C14  | 18(2)           | 14(2)           | 22(2)           | 1.2(18)         | 3.8(19)         | 2.4(18)         |
| C15  | 17(2)           | 11(2)           | 21(2)           | -4.4(18)        | -0.6(19)        | 1.4(18)         |
| C16  | 20(2)           | 13(2)           | 29(3)           | 2.2(19)         | 1(2)            | 2.7(19)         |
| C17  | 21(2)           | 16(2)           | 31(3)           | -2(2)           | 8(2)            | 1(2)            |
| C18  | 20(2)           | 18(2)           | 38(3)           | -6(2)           | 1(2)            | 4(2)            |
| C19  | 26(3)           | 13(2)           | 31(3)           | 0.1(19)         | -2(2)           | 2(2)            |
| C20  | 19(2)           | 13(2)           | 28(3)           | -4.1(19)        | 5(2)            | -4.2(19)        |
| C21  | 19(2)           | 21(3)           | 29(3)           | -7(2)           | -1(2)           | -8(2)           |
| C22  | 27(3)           | 28(3)           | 27(3)           | -8(2)           | 3(2)            | -6(2)           |
| C23  | 33(3)           | 42(3)           | 34(3)           | -13(3)          | 7(2)            | -10(3)          |
| C24  | 27(3)           | 42(3)           | 44(3)           | -26(3)          | 15(3)           | -11(3)          |
| C25  | 17(2)           | 34(3)           | 51(4)           | -13(3)          | 5(2)            | 3(2)            |
| C26  | 22(2)           | 26(3)           | 33(3)           | -10(2)          | 2(2)            | -5(2)           |
| C27  | 25(3)           | 21(2)           | 17(2)           | -2.3(18)        | 5(2)            | -2(2)           |

|     |        |       |       |          |          |          |
|-----|--------|-------|-------|----------|----------|----------|
| C28 | 19(2)  | 21(3) | 38(3) | -3(2)    | 1(2)     | 0(2)     |
| C29 | 28(3)  | 13(2) | 47(3) | 1(2)     | 3(2)     | 0(2)     |
| C30 | 31(3)  | 22(3) | 34(3) | 7(2)     | 5(2)     | 6(2)     |
| C31 | 28(3)  | 35(3) | 28(3) | 7(2)     | -3(2)    | -2(2)    |
| C32 | 27(3)  | 28(3) | 26(3) | 4(2)     | -1(2)    | -4(2)    |
| C33 | 15(2)  | 17(2) | 17(2) | 3.2(18)  | -0.6(18) | -0.2(18) |
| C34 | 23(2)  | 21(3) | 26(3) | -7(2)    | -2(2)    | 0(2)     |
| C35 | 29(3)  | 18(2) | 26(3) | -3(2)    | -3(2)    | -7(2)    |
| C36 | 17(2)  | 23(3) | 30(3) | 5(2)     | -2(2)    | -3(2)    |
| C37 | 18(2)  | 20(2) | 23(2) | 2.5(19)  | -1.6(19) | -3.4(19) |
| C38 | 15(2)  | 13(2) | 20(2) | -1.1(18) | -2.9(18) | 0.1(18)  |
| C39 | 23(2)  | 15(2) | 24(2) | 2.2(19)  | 2(2)     | -2.0(19) |
| C40 | 25(3)  | 17(2) | 26(3) | 4(2)     | -1(2)    | -7(2)    |
| C41 | 32(3)  | 13(2) | 30(3) | -1.1(19) | -5(2)    | -1(2)    |
| C42 | 22(2)  | 20(2) | 22(2) | 2.6(19)  | 0(2)     | 3(2)     |
| C43 | 32(3)  | 72(4) | 24(3) | -1(3)    | 6(2)     | 4(3)     |
| C44 | 131(7) | 48(4) | 50(4) | 0(3)     | 11(5)    | 28(5)    |

**Table S43.** Bond Lengths for **10**.

| Atom | Atom | Length/Å   | Atom | Atom | Length/Å |
|------|------|------------|------|------|----------|
| Br1  | Ni1  | 2.3303(7)  | C10  | C11  | 1.365(6) |
| Ni1  | P1   | 2.2616(13) | C11  | C12  | 1.369(7) |
| Ni1  | P2   | 2.1378(12) | C12  | C13  | 1.364(7) |
| Ni1  | C1   | 1.888(4)   | C13  | C14  | 1.375(6) |
| Fe1  | C33  | 1.995(4)   | C15  | C16  | 1.379(6) |
| Fe1  | C34  | 2.017(5)   | C15  | C20  | 1.375(6) |
| Fe1  | C35  | 2.036(5)   | C16  | C17  | 1.373(6) |
| Fe1  | C36  | 2.039(5)   | C17  | C18  | 1.369(7) |
| Fe1  | C37  | 2.011(4)   | C18  | C19  | 1.375(6) |
| Fe1  | C38  | 1.995(4)   | C19  | C20  | 1.379(6) |
| Fe1  | C39  | 2.015(5)   | C21  | C22  | 1.375(7) |
| Fe1  | C40  | 2.042(5)   | C21  | C26  | 1.375(7) |
| Fe1  | C41  | 2.029(5)   | C22  | C23  | 1.374(7) |
| Fe1  | C42  | 2.003(4)   | C23  | C24  | 1.371(8) |
| P1   | C21  | 1.812(5)   | C24  | C25  | 1.366(7) |
| P1   | C27  | 1.820(5)   | C25  | C26  | 1.387(7) |
| P1   | C33  | 1.810(4)   | C27  | C28  | 1.379(6) |
| P2   | C9   | 1.804(4)   | C27  | C32  | 1.381(7) |
| P2   | C15  | 1.810(4)   | C28  | C29  | 1.372(7) |
| P2   | C38  | 1.785(4)   | C29  | C30  | 1.372(7) |
| F1   | C7   | 1.302(6)   | C30  | C31  | 1.367(7) |
| F2   | C7   | 1.292(6)   | C31  | C32  | 1.381(7) |



|    |                  |          |     |                  |           |
|----|------------------|----------|-----|------------------|-----------|
| F3 | C7               | 1.344(6) | C33 | C34              | 1.428(6)  |
| O1 | C43              | 1.440(6) | C33 | C37              | 1.410(6)  |
| O1 | C43 <sup>1</sup> | 1.440(6) | C34 | C35              | 1.395(6)  |
| C1 | C2               | 1.375(6) | C35 | C36              | 1.400(7)  |
| C1 | C6               | 1.393(6) | C36 | C37              | 1.404(6)  |
| C2 | C3               | 1.381(6) | C38 | C39              | 1.421(6)  |
| C3 | C4               | 1.374(6) | C38 | C42              | 1.423(6)  |
| C3 | C7               | 1.466(6) | C39 | C40              | 1.412(6)  |
| C4 | C5               | 1.370(6) | C40 | C41              | 1.395(7)  |
| C5 | C6               | 1.376(6) | C41 | C42              | 1.401(6)  |
| C6 | C8               | 1.493(6) | C43 | C44              | 1.475(9)  |
| C9 | C10              | 1.392(6) | C44 | C44 <sup>1</sup> | 1.369(13) |
| C9 | C14              | 1.381(6) |     |                  |           |

<sup>1</sup>/<sub>3</sub>-X,+Y,1-Z

**Table S44.** Bond Angles for **10**.

| Atom | Atom | Atom | Angle/°    | Atom | Atom | Atom | Angle/°  |
|------|------|------|------------|------|------|------|----------|
| P1   | Ni1  | Br1  | 90.16(4)   | F1   | C7   | F3   | 102.3(4) |
| P2   | Ni1  | Br1  | 169.09(4)  | F1   | C7   | C3   | 114.5(4) |
| P2   | Ni1  | P1   | 100.16(5)  | F2   | C7   | F1   | 109.7(5) |
| C1   | Ni1  | Br1  | 86.31(13)  | F2   | C7   | F3   | 103.6(5) |
| C1   | Ni1  | P1   | 171.17(14) | F2   | C7   | C3   | 113.9(4) |
| C1   | Ni1  | P2   | 83.96(13)  | F3   | C7   | C3   | 111.7(4) |
| C33  | Fe1  | C34  | 41.71(18)  | C10  | C9   | P2   | 122.3(3) |
| C33  | Fe1  | C35  | 69.10(18)  | C14  | C9   | P2   | 119.8(3) |
| C33  | Fe1  | C36  | 69.06(18)  | C14  | C9   | C10  | 117.9(4) |
| C33  | Fe1  | C37  | 41.19(17)  | C11  | C10  | C9   | 120.8(4) |
| C33  | Fe1  | C38  | 108.08(18) | C10  | C11  | C12  | 120.5(4) |
| C33  | Fe1  | C39  | 136.22(18) | C13  | C12  | C11  | 119.6(4) |
| C33  | Fe1  | C40  | 176.92(18) | C12  | C13  | C14  | 120.5(4) |
| C33  | Fe1  | C41  | 141.01(19) | C13  | C14  | C9   | 120.7(4) |
| C33  | Fe1  | C42  | 110.69(18) | C16  | C15  | P2   | 120.7(3) |
| C34  | Fe1  | C35  | 40.25(18)  | C20  | C15  | P2   | 120.0(3) |
| C34  | Fe1  | C36  | 68.05(19)  | C20  | C15  | C16  | 119.1(4) |
| C34  | Fe1  | C40  | 141.35(19) | C17  | C16  | C15  | 120.4(4) |
| C34  | Fe1  | C41  | 113.2(2)   | C18  | C17  | C16  | 120.5(4) |
| C35  | Fe1  | C36  | 40.19(19)  | C17  | C18  | C19  | 119.4(4) |
| C35  | Fe1  | C40  | 113.57(19) | C18  | C19  | C20  | 120.2(4) |
| C36  | Fe1  | C40  | 111.82(19) | C15  | C20  | C19  | 120.3(4) |
| C37  | Fe1  | C34  | 68.80(19)  | C22  | C21  | P1   | 121.7(4) |
| C37  | Fe1  | C35  | 68.12(19)  | C22  | C21  | C26  | 120.0(5) |

|     |     |                  |            |     |     |     |          |
|-----|-----|------------------|------------|-----|-----|-----|----------|
| C37 | Fe1 | C36              | 40.57(18)  | C26 | C21 | P1  | 118.0(4) |
| C37 | Fe1 | C39              | 109.72(18) | C21 | C22 | C23 | 120.4(5) |
| C37 | Fe1 | C40              | 137.68(19) | C24 | C23 | C22 | 119.6(5) |
| C37 | Fe1 | C41              | 177.7(2)   | C25 | C24 | C23 | 120.5(5) |
| C38 | Fe1 | C34              | 137.25(18) | C24 | C25 | C26 | 120.1(5) |
| C38 | Fe1 | C35              | 177.15(18) | C21 | C26 | C25 | 119.4(5) |
| C38 | Fe1 | C36              | 139.76(18) | C28 | C27 | P1  | 120.0(4) |
| C38 | Fe1 | C37              | 110.15(18) | C28 | C27 | C32 | 117.9(4) |
| C38 | Fe1 | C39              | 41.49(17)  | C32 | C27 | P1  | 122.0(4) |
| C38 | Fe1 | C40              | 69.26(18)  | C29 | C28 | C27 | 121.3(4) |
| C38 | Fe1 | C41              | 69.15(18)  | C30 | C29 | C28 | 120.2(5) |
| C38 | Fe1 | C42              | 41.69(18)  | C31 | C30 | C29 | 119.5(5) |
| C39 | Fe1 | C34              | 177.91(18) | C30 | C31 | C32 | 120.2(5) |
| C39 | Fe1 | C35              | 140.95(19) | C31 | C32 | C27 | 120.9(5) |
| C39 | Fe1 | C36              | 111.90(19) | P1  | C33 | Fe1 | 122.1(2) |
| C39 | Fe1 | C40              | 40.72(18)  | C34 | C33 | Fe1 | 70.0(3)  |
| C39 | Fe1 | C41              | 68.26(19)  | C34 | C33 | P1  | 124.6(3) |
| C41 | Fe1 | C35              | 112.67(19) | C37 | C33 | Fe1 | 70.0(3)  |
| C41 | Fe1 | C36              | 138.74(19) | C37 | C33 | P1  | 128.7(3) |
| C41 | Fe1 | C40              | 40.09(19)  | C37 | C33 | C34 | 106.6(4) |
| C42 | Fe1 | C34              | 110.77(19) | C33 | C34 | Fe1 | 68.3(3)  |
| C42 | Fe1 | C35              | 138.36(19) | C35 | C34 | Fe1 | 70.6(3)  |
| C42 | Fe1 | C36              | 178.55(19) | C35 | C34 | C33 | 108.2(4) |
| C42 | Fe1 | C37              | 140.09(18) | C34 | C35 | Fe1 | 69.1(3)  |
| C42 | Fe1 | C39              | 69.32(18)  | C34 | C35 | C36 | 108.6(4) |
| C42 | Fe1 | C40              | 68.50(19)  | C36 | C35 | Fe1 | 70.0(3)  |
| C42 | Fe1 | C41              | 40.67(19)  | C35 | C36 | Fe1 | 69.8(3)  |
| C21 | P1  | Ni1              | 113.78(15) | C35 | C36 | C37 | 107.9(4) |
| C21 | P1  | C27              | 106.0(2)   | C37 | C36 | Fe1 | 68.7(3)  |
| C27 | P1  | Ni1              | 111.20(15) | C33 | C37 | Fe1 | 68.8(3)  |
| C33 | P1  | Ni1              | 123.63(15) | C36 | C37 | Fe1 | 70.8(3)  |
| C33 | P1  | C21              | 98.8(2)    | C36 | C37 | C33 | 108.7(4) |
| C33 | P1  | C27              | 101.4(2)   | P2  | C38 | Fe1 | 125.4(2) |
| C9  | P2  | Ni1              | 120.88(14) | C39 | C38 | Fe1 | 70.0(3)  |
| C9  | P2  | C15              | 103.4(2)   | C39 | C38 | P2  | 128.5(3) |
| C15 | P2  | Ni1              | 112.21(15) | C39 | C38 | C42 | 107.0(4) |
| C38 | P2  | Ni1              | 114.02(15) | C42 | C38 | Fe1 | 69.4(2)  |
| C38 | P2  | C9               | 99.8(2)    | C42 | C38 | P2  | 124.5(3) |
| C38 | P2  | C15              | 104.7(2)   | C38 | C39 | Fe1 | 68.5(3)  |
| C43 | O1  | C43 <sup>1</sup> | 108.4(6)   | C40 | C39 | Fe1 | 70.7(3)  |
| C2  | C1  | Ni1              | 119.5(3)   | C40 | C39 | C38 | 108.2(4) |
| C2  | C1  | C6               | 118.7(4)   | C39 | C40 | Fe1 | 68.6(3)  |

|    |    |     |          |                  |     |     |          |
|----|----|-----|----------|------------------|-----|-----|----------|
| C6 | C1 | Ni1 | 121.7(3) | C41              | C40 | Fe1 | 69.5(3)  |
| C1 | C2 | C3  | 121.1(4) | C41              | C40 | C39 | 107.9(4) |
| C2 | C3 | C7  | 119.1(4) | C40              | C41 | Fe1 | 70.5(3)  |
| C4 | C3 | C2  | 120.1(4) | C40              | C41 | C42 | 109.0(4) |
| C4 | C3 | C7  | 120.8(4) | C42              | C41 | Fe1 | 68.7(3)  |
| C5 | C4 | C3  | 119.0(4) | C38              | C42 | Fe1 | 68.9(2)  |
| C4 | C5 | C6  | 121.7(4) | C41              | C42 | Fe1 | 70.7(3)  |
| C1 | C6 | C8  | 120.3(4) | C41              | C42 | C38 | 107.9(4) |
| C5 | C6 | C1  | 119.3(4) | O1               | C43 | C44 | 105.8(5) |
| C5 | C6 | C8  | 120.4(4) | C44 <sup>1</sup> | C44 | C43 | 107.9(4) |

$1/3-X,+Y,1-Z$

*X-ray Diffraction Data for (dppf)Ni(2-trifluoromethyl-6-methylphenyl)(Br) (12)*

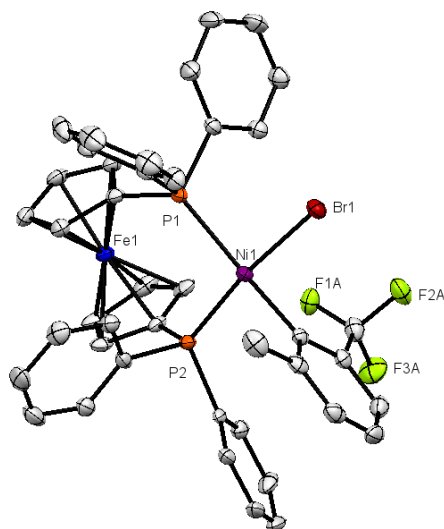

**Figure S61.** ORTEP of **12**, with ellipsoids shown at 50% probability. Disorder in the aryl ring, hydrogen atoms and solvent of crystallization have been removed for clarity.

Crystals suitable for X-ray diffraction were grown from a concentrated solution of **12** in THF layered with pentane at  $-15\text{ }^{\circ}\text{C}$ . Low-temperature diffraction data ( $\omega$ -scans) were collected on a Rigaku SCX Mini diffractometer coupled to a Rigaku Mercury275R CCD with Mo  $K\alpha$  radiation ( $\lambda = 0.71073\text{ \AA}$ ) for the structure of **12** (Figure S61). The diffraction images were processed and scaled using Rigaku Oxford Diffraction software.<sup>10</sup> The structure was solved with SHELXT and was refined against  $F^2$  on all data by full-matrix least squares with SHELXL.<sup>11</sup> All non-hydrogen atoms were refined anisotropically. Hydrogen atoms were included in the model at geometrically calculated positions and refined using a riding model. The isotropic displacement parameters of

all hydrogen atoms were fixed to 1.2 times the U value of the atoms to which they are linked (1.5 times for methyl groups). Both THF models are disordered. Atoms O1, C43, C44, C45, and C46 are disordered across the crystallographic 2-fold axis. The special position constraints were suppressed and the site occupancies were restrained to be 0.5. Chemically identical C-C and C-O bonds were restrained to be similar. The THF, as a group, was restrained to have similar tensor directions and behave as a rigid body. A similar approach was used for atoms O2, C47, C48, C49, and C50. The site occupancies were freely refined and fixed near their converged values of 0.5 for each atom. O2B did not refine well and required that the thermal parameters be constrained to the same value refined for O2A. Chemically identical C-C and C-O bonds were restrained to be similar. Each THF model, as a group, was restrained to have similar tensor directions and behave as a rigid body. The two, complementary models were distinguished with atom label suffixes "A" and "B". Based on the difference map there appeared to be a minor disordered position of the ortho CF3 group. The site occupancies of the CF3 groups were freely refined to converged values of 0.83/0.17. Atoms C7 and C8 were split in two. These two positions were then constrained to be identical in thermal and position parameters. The minor component fluorine atoms were constrained to have the same thermal parameters to their chemically identical counterparts. The full numbering scheme of compound **12** can be found in the full details of the X-ray structure determination (CIF), which is included as Supporting Information. CCDC number 1860565 contains the supplementary crystallographic data for this paper. These data can be obtained free of charge from The Cambridge Crystallographic Data Center via [www.ccdc.cam.ac.uk/data\\_request/cif](http://www.ccdc.cam.ac.uk/data_request/cif).

**Table S45.** Crystal data and structure refinement for **12**.

|                   |                                                                                         |
|-------------------|-----------------------------------------------------------------------------------------|
| Empirical formula | C <sub>48</sub> H <sub>46</sub> BrF <sub>3.03</sub> FeNiO <sub>1.5</sub> P <sub>2</sub> |
| Formula weight    | 960.85                                                                                  |
| Temperature/K     | 93(2)                                                                                   |
| Crystal system    | monoclinic                                                                              |
| Space group       | C2/c                                                                                    |
| a/Å               | 23.8460(10)                                                                             |
| b/Å               | 10.0157(4)                                                                              |
| c/Å               | 34.4671(15)                                                                             |
| α/°               | 90                                                                                      |
| β/°               | 95.897(4)                                                                               |
| γ/°               | 90                                                                                      |

|                                    |                                                               |
|------------------------------------|---------------------------------------------------------------|
| Volume/Å <sup>3</sup>              | 8188.4(6)                                                     |
| Z                                  | 8                                                             |
| ρ <sub>calc</sub> /cm <sup>3</sup> | 1.559                                                         |
| μ/mm <sup>-1</sup>                 | 1.921                                                         |
| F(000)                             | 3938.0                                                        |
| Crystal size/mm <sup>3</sup>       | 0.200 × 0.100 × 0.100                                         |
| Radiation                          | MoKα (λ = 0.71073)                                            |
| 2θ range for data collection/°     | 5.096 to 54.968                                               |
| Index ranges                       | -30 ≤ h ≤ 30, -13 ≤ k ≤ 12, -44 ≤ l ≤ 44                      |
| Reflections collected              | 69711                                                         |
| Independent reflections            | 9370 [R <sub>int</sub> = 0.1211, R <sub>sigma</sub> = 0.0689] |
| Data/restraints/parameters         | 9370/116/591                                                  |
| Goodness-of-fit on F <sup>2</sup>  | 1.054                                                         |
| Final R indexes [I >= 2σ (I)]      | R <sub>1</sub> = 0.0593, wR <sub>2</sub> = 0.0997             |
| Final R indexes [all data]         | R <sub>1</sub> = 0.0942, wR <sub>2</sub> = 0.1105             |

**Table S46.** Fractional Atomic Coordinates (×10<sup>4</sup>) and Equivalent Isotropic Displacement Parameters (Å<sup>2</sup>×10<sup>3</sup>) for **12**. U<sub>eq</sub> is defined as 1/3 of the trace of the orthogonalised U<sub>ij</sub> tensor.

| Atom | x          | y          | z          | U(eq)     |
|------|------------|------------|------------|-----------|
| Br1  | 2830.2(2)  | 33.5(4)    | 3673.0(2)  | 22.50(11) |
| Ni1  | 3224.0(2)  | 2063.4(5)  | 3884.4(2)  | 15.05(12) |
| Fe1  | 2550.0(2)  | 5549.3(6)  | 4390.6(2)  | 16.99(13) |
| P1   | 2373.7(4)  | 3122.1(10) | 3701.9(3)  | 15.9(2)   |
| P2   | 3672.1(4)  | 3797.3(10) | 4132.4(3)  | 14.7(2)   |
| C1   | 3927.4(16) | 1100(4)    | 3973.3(12) | 17.8(8)   |
| C2   | 4117.3(17) | 480(4)     | 4325.7(12) | 20.6(9)   |
| C3   | 4644.6(19) | -127(4)    | 4384.7(13) | 27.5(10)  |
| C4   | 4997.9(18) | -137(4)    | 4095.5(15) | 30.5(11)  |
| C5   | 4816.0(18) | 419(4)     | 3741.0(14) | 26.4(10)  |
| C6   | 4288.1(17) | 1019(4)    | 3674.2(12) | 21.1(9)   |
| C9   | 2171.6(16) | 4730(4)    | 3898.2(11) | 17.5(9)   |
| C10  | 2383.9(17) | 6035(4)    | 3821.3(12) | 20.5(9)   |
| C11  | 2118.1(17) | 6968(4)    | 4053.9(13) | 24.6(10)  |
| C12  | 1744.4(16) | 6258(4)    | 4268.0(12) | 22.9(9)   |
| C13  | 1770.4(16) | 4893(4)    | 4175.8(12) | 20.1(9)   |
| C14  | 3312.1(16) | 4694(4)    | 4485.6(11) | 17.3(9)   |
| C15  | 3352.1(16) | 6100(4)    | 4566.0(12) | 21.8(9)   |
| C16  | 3008.7(17) | 6383(5)    | 4865.6(13) | 28.5(11)  |
| C17  | 2754.0(18) | 5195(5)    | 4970.9(12) | 26.9(10)  |
| C18  | 2940.0(16) | 4151(5)    | 4739.5(12) | 23.4(10)  |
| C19  | 2249.3(17) | 3422(4)    | 3176.8(12) | 19.5(9)   |
| C20  | 2471.8(18) | 2562(5)    | 2918.3(12) | 25.8(10)  |

|      |            |          |            |          |
|------|------------|----------|------------|----------|
| C21  | 2389(2)    | 2785(5)  | 2522.7(13) | 32.4(11) |
| C22  | 2076(2)    | 3858(5)  | 2375.7(13) | 36.1(12) |
| C23  | 1839(2)    | 4707(5)  | 2627.0(13) | 34.1(12) |
| C24  | 1930.2(19) | 4502(5)  | 3026.1(13) | 26.9(10) |
| C25  | 1753.2(16) | 2186(4)  | 3807.7(12) | 19.2(9)  |
| C26  | 1241.9(18) | 2321(5)  | 3577.2(14) | 30.6(11) |
| C27  | 760.5(19)  | 1746(5)  | 3690.6(15) | 38.6(13) |
| C28  | 782.1(19)  | 1023(5)  | 4027.9(15) | 34.4(12) |
| C29  | 1284.3(18) | 856(4)   | 4255.6(13) | 25.5(10) |
| C30  | 1770.5(17) | 1443(4)  | 4147.6(12) | 20.8(9)  |
| C31  | 4361.1(16) | 3554(4)  | 4409.3(12) | 17.3(8)  |
| C32  | 4405.5(17) | 3448(4)  | 4812.9(12) | 22.0(9)  |
| C33  | 4919.1(19) | 3162(4)  | 5017.9(14) | 30.2(11) |
| C34  | 5388.6(18) | 2979(4)  | 4824.9(15) | 31.3(11) |
| C35  | 5346.6(17) | 3093(4)  | 4424.2(15) | 28.9(11) |
| C36  | 4836.0(16) | 3383(4)  | 4214.3(14) | 22.7(9)  |
| C37  | 3816.4(16) | 5039(4)  | 3773.0(12) | 18.5(8)  |
| C38  | 3564.6(16) | 4924(4)  | 3392.6(12) | 21.0(9)  |
| C39  | 3631.0(19) | 5917(5)  | 3120.3(13) | 29.8(11) |
| C40  | 3946.0(19) | 7035(5)  | 3228.2(15) | 33.5(11) |
| C41  | 4209.4(18) | 7141(5)  | 3601.0(15) | 31.4(11) |
| C42  | 4152.4(17) | 6145(4)  | 3870.0(13) | 23.3(9)  |
| F1A  | 3377.9(12) | 1280(3)  | 4666.2(8)  | 26.7(7)  |
| F2A  | 3492.7(13) | -834(3)  | 4643.4(9)  | 33.9(8)  |
| F3A  | 4072.2(14) | 365(3)   | 5006.0(9)  | 37.9(8)  |
| C7A  | 3755(2)    | 358(4)   | 4649.3(13) | 27.2(10) |
| C8A  | 4123(2)    | 1605(5)  | 3279.9(13) | 32.8(11) |
| F1B  | 4412(6)    | 735(15)  | 3023(5)    | 33.9(8)  |
| F2B  | 4503(7)    | 2697(17) | 3248(4)    | 37.9(8)  |
| F3B  | 3658(5)    | 1753(12) | 3164(4)    | 26.7(7)  |
| C7B  | 3755(2)    | 358(4)   | 4649.3(13) | 27.2(10) |
| C8B  | 4123(2)    | 1605(5)  | 3279.9(13) | 32.8(11) |
| O2A  | 3542(7)    | 3408(19) | 1828(4)    | 116(4)   |
| C47A | 3916(9)    | 3940(30) | 2194(6)    | 137(11)  |
| C48A | 4395(7)    | 3179(17) | 2215(5)    | 97(6)    |
| C49A | 4369(6)    | 2147(12) | 1982(4)    | 56(3)    |
| C50A | 4044(5)    | 2628(15) | 1661(4)    | 46(3)    |
| O2B  | 3657(8)    | 3695(18) | 1676(4)    | 116(4)   |
| C47B | 3691(5)    | 4417(11) | 2088(3)    | 38(2)    |
| C48B | 3934(7)    | 3469(11) | 2363(3)    | 53(3)    |
| C49B | 4085(6)    | 2368(11) | 2179(3)    | 52(3)    |
| C50B | 4121(10)   | 2600(20) | 1800(4)    | 97(7)    |

|     |          |          |         |        |
|-----|----------|----------|---------|--------|
| O1  | 4509(5)  | 7665(9)  | 2327(3) | 62(3)  |
| C43 | 5028(10) | 7062(9)  | 2555(8) | 54(4)  |
| C44 | 5280(9)  | 8259(15) | 2746(6) | 101(7) |
| C45 | 5184(5)  | 9310(11) | 2446(4) | 62(4)  |
| C46 | 4620(7)  | 9074(16) | 2274(5) | 83(5)  |

**Table S47.** Anisotropic Displacement Parameters ( $\text{\AA}^2 \times 10^3$ ) for **12**. The Anisotropic displacement factor exponent takes the form:  $-2\pi^2[h^2a^{*2}U_{11}+2hka^*b^*U_{12}+\dots]$ .

| Atom | U <sub>11</sub> | U <sub>22</sub> | U <sub>33</sub> | U <sub>23</sub> | U <sub>13</sub> | U <sub>12</sub> |
|------|-----------------|-----------------|-----------------|-----------------|-----------------|-----------------|
| Br1  | 22.8(2)         | 17.8(2)         | 26.5(2)         | -4.47(18)       | 0.18(16)        | -4.44(18)       |
| Ni1  | 14.4(2)         | 13.6(3)         | 16.7(3)         | -0.9(2)         | -0.27(19)       | -2.1(2)         |
| Fe1  | 12.3(3)         | 19.0(3)         | 19.1(3)         | -1.1(3)         | -1.1(2)         | 2.0(2)          |
| P1   | 15.0(5)         | 15.7(5)         | 16.5(5)         | 1.2(4)          | -1.4(4)         | -2.8(4)         |
| P2   | 11.3(5)         | 15.5(5)         | 16.9(5)         | -1.8(4)         | -0.3(4)         | -0.1(4)         |
| C1   | 16.5(19)        | 13(2)           | 23(2)           | -3.6(17)        | 1.5(16)         | -1.4(16)        |
| C2   | 23(2)           | 14(2)           | 24(2)           | -3.1(17)        | 0.7(17)         | -1.6(17)        |
| C3   | 32(2)           | 18(2)           | 31(2)           | -0.5(19)        | -7(2)           | 2(2)            |
| C4   | 17(2)           | 19(2)           | 55(3)           | -7(2)           | -1(2)           | 4.0(19)         |
| C5   | 23(2)           | 20(2)           | 38(3)           | -8(2)           | 7(2)            | -2.9(18)        |
| C6   | 23(2)           | 18(2)           | 23(2)           | -5.7(18)        | 1.9(17)         | -5.1(18)        |
| C9   | 13.0(18)        | 21(2)           | 18(2)           | 0.2(16)         | -2.4(16)        | -0.2(16)        |
| C10  | 18(2)           | 21(2)           | 22(2)           | 1.6(18)         | -1.1(17)        | 0.2(17)         |
| C11  | 21(2)           | 19(2)           | 33(2)           | 0.3(19)         | -4.8(18)        | 5.3(18)         |
| C12  | 14(2)           | 27(2)           | 27(2)           | -2.5(19)        | -1.0(17)        | 6.8(18)         |
| C13  | 12.4(18)        | 24(2)           | 24(2)           | 2.1(19)         | -0.6(16)        | 1.0(18)         |
| C14  | 13.2(19)        | 19(2)           | 18(2)           | -4.4(16)        | -3.5(15)        | 4.9(16)         |
| C15  | 13.4(19)        | 25(2)           | 25(2)           | -8.1(19)        | -4.1(17)        | -1.6(17)        |
| C16  | 15(2)           | 38(3)           | 31(3)           | -15(2)          | -6.8(18)        | 6(2)            |
| C17  | 21(2)           | 39(3)           | 21(2)           | -1(2)           | -0.2(17)        | 11(2)           |
| C18  | 17(2)           | 31(2)           | 21(2)           | 6.0(19)         | -3.6(17)        | 5.9(19)         |
| C19  | 21(2)           | 17(2)           | 20(2)           | 0.8(17)         | -3.4(17)        | -9.3(17)        |
| C20  | 31(2)           | 28(2)           | 18(2)           | 2.0(19)         | 1.9(18)         | -4(2)           |
| C21  | 38(3)           | 39(3)           | 19(2)           | -3(2)           | 2(2)            | -7(2)           |
| C22  | 45(3)           | 43(3)           | 17(2)           | 9(2)            | -8(2)           | -14(3)          |
| C23  | 48(3)           | 25(3)           | 27(3)           | 8(2)            | -11(2)          | -10(2)          |
| C24  | 31(2)           | 25(2)           | 22(2)           | 2.1(19)         | -6.9(19)        | -5(2)           |
| C25  | 17(2)           | 15(2)           | 25(2)           | -2.5(17)        | 1.5(17)         | -2.8(17)        |
| C26  | 26(2)           | 29(3)           | 34(3)           | 10(2)           | -8(2)           | -5(2)           |
| C27  | 19(2)           | 42(3)           | 51(3)           | 18(3)           | -13(2)          | -10(2)          |
| C28  | 21(2)           | 37(3)           | 45(3)           | 8(2)            | 4(2)            | -10(2)          |
| C29  | 27(2)           | 27(2)           | 23(2)           | 5.0(19)         | 4.4(18)         | -4.2(19)        |
| C30  | 19(2)           | 22(2)           | 21(2)           | -0.7(18)        | 1.2(17)         | -3.1(18)        |

|      |          |          |          |          |          |          |
|------|----------|----------|----------|----------|----------|----------|
| C31  | 14.7(19) | 8.6(19)  | 27(2)    | -1.9(17) | -5.6(16) | 0.1(16)  |
| C32  | 19(2)    | 16(2)    | 29(2)    | -4.0(18) | -2.7(18) | 2.4(17)  |
| C33  | 31(3)    | 22(2)    | 33(3)    | -3(2)    | -17(2)   | 5(2)     |
| C34  | 17(2)    | 19(2)    | 54(3)    | -3(2)    | -17(2)   | 1.3(19)  |
| C35  | 13(2)    | 17(2)    | 56(3)    | 1(2)     | 1(2)     | -1.3(17) |
| C36  | 15(2)    | 14(2)    | 39(3)    | -0.8(19) | 1.2(18)  | -2.7(17) |
| C37  | 15.3(19) | 13.3(19) | 28(2)    | -2.2(18) | 5.7(16)  | -1.2(17) |
| C38  | 17(2)    | 22(2)    | 24(2)    | -0.7(19) | 0.9(16)  | -0.3(18) |
| C39  | 29(2)    | 37(3)    | 24(2)    | 7(2)     | 3.5(19)  | 1(2)     |
| C40  | 29(2)    | 27(3)    | 47(3)    | 13(2)    | 11(2)    | -3(2)    |
| C41  | 25(2)    | 23(2)    | 48(3)    | -4(2)    | 8(2)     | -9(2)    |
| C42  | 19(2)    | 19(2)    | 31(2)    | -2.5(19) | 3.3(18)  | 0.3(18)  |
| F1A  | 33.2(17) | 23.3(16) | 24.7(16) | 3.3(13)  | 8.5(13)  | 7.5(13)  |
| F2A  | 38.5(19) | 21.2(16) | 44(2)    | -0.9(14) | 15.7(15) | -5.5(14) |
| F3A  | 39.5(19) | 50(2)    | 22.8(17) | 6.5(15)  | -3.7(14) | 3.0(16)  |
| C7A  | 36(3)    | 19(2)    | 26(2)    | -0.5(18) | 0(2)     | -2.0(19) |
| C8A  | 41(3)    | 33(3)    | 26(3)    | -2(2)    | 11(2)    | -6(2)    |
| F1B  | 38.5(19) | 21.2(16) | 44(2)    | -0.9(14) | 15.7(15) | -5.5(14) |
| F2B  | 39.5(19) | 50(2)    | 22.8(17) | 6.5(15)  | -3.7(14) | 3.0(16)  |
| F3B  | 33.2(17) | 23.3(16) | 24.7(16) | 3.3(13)  | 8.5(13)  | 7.5(13)  |
| C7B  | 36(3)    | 19(2)    | 26(2)    | -0.5(18) | 0(2)     | -2.0(19) |
| C8B  | 41(3)    | 33(3)    | 26(3)    | -2(2)    | 11(2)    | -6(2)    |
| O2A  | 134(6)   | 129(8)   | 80(6)    | -18(6)   | -13(5)   | 38(6)    |
| C47A | 145(12)  | 155(17)  | 100(13)  | -51(13)  | -44(10)  | 72(12)   |
| C48A | 111(10)  | 95(10)   | 73(8)    | -7(7)    | -47(8)   | 41(8)    |
| C49A | 62(7)    | 56(7)    | 42(6)    | 25(5)    | -25(5)   | 11(6)    |
| C50A | 33(5)    | 53(7)    | 46(6)    | 13(5)    | -16(4)   | 3(5)     |
| O2B  | 134(6)   | 129(8)   | 80(6)    | -18(6)   | -13(5)   | 38(6)    |
| C47B | 43(6)    | 37(5)    | 32(5)    | 4(4)     | -3(4)    | -1(4)    |
| C48B | 64(8)    | 48(6)    | 43(6)    | 4(4)     | -4(5)    | 16(5)    |
| C49B | 90(9)    | 24(5)    | 39(6)    | -2(4)    | -10(6)   | 19(5)    |
| C50B | 123(15)  | 110(11)  | 56(7)    | -5(6)    | 6(7)     | 44(11)   |
| O1   | 93(6)    | 52(5)    | 38(5)    | 10(4)    | -5(4)    | -13(5)   |
| C43  | 60(6)    | 40(5)    | 65(12)   | 20(6)    | 22(6)    | -19(6)   |
| C44  | 119(14)  | 43(7)    | 127(11)  | 20(8)    | -54(10)  | -36(8)   |
| C45  | 60(8)    | 35(5)    | 91(10)   | 2(6)     | 4(7)     | -2(4)    |
| C46  | 82(8)    | 53(7)    | 106(13)  | 24(6)    | -22(8)   | -19(5)   |

**Table S48.** Bond Lengths for **12**.

| Atom | Atom | Length/Å  | Atom | Atom | Length/Å |
|------|------|-----------|------|------|----------|
| Br1  | Ni1  | 2.3249(6) | C21  | C22  | 1.375(7) |



|     |     |            |      |      |           |
|-----|-----|------------|------|------|-----------|
| Ni1 | C1  | 1.932(4)   | C22  | C23  | 1.375(7)  |
| Ni1 | P2  | 2.1681(11) | C23  | C24  | 1.385(6)  |
| Ni1 | P1  | 2.3172(11) | C25  | C30  | 1.385(6)  |
| Fe1 | C14 | 2.005(4)   | C25  | C26  | 1.392(6)  |
| Fe1 | C18 | 2.011(4)   | C26  | C27  | 1.377(6)  |
| Fe1 | C9  | 2.014(4)   | C27  | C28  | 1.366(7)  |
| Fe1 | C10 | 2.021(4)   | C28  | C29  | 1.373(6)  |
| Fe1 | C15 | 2.022(4)   | C29  | C30  | 1.385(6)  |
| Fe1 | C13 | 2.038(4)   | C31  | C36  | 1.386(6)  |
| Fe1 | C17 | 2.040(4)   | C31  | C32  | 1.388(6)  |
| Fe1 | C11 | 2.045(4)   | C32  | C33  | 1.380(6)  |
| Fe1 | C12 | 2.051(4)   | C33  | C34  | 1.372(7)  |
| Fe1 | C16 | 2.051(4)   | C34  | C35  | 1.379(7)  |
| P1  | C25 | 1.820(4)   | C35  | C36  | 1.382(6)  |
| P1  | C19 | 1.829(4)   | C37  | C42  | 1.387(6)  |
| P1  | C9  | 1.830(4)   | C37  | C38  | 1.390(6)  |
| P2  | C14 | 1.800(4)   | C38  | C39  | 1.387(6)  |
| P2  | C37 | 1.813(4)   | C39  | C40  | 1.378(6)  |
| P2  | C31 | 1.830(4)   | C40  | C41  | 1.375(7)  |
| C1  | C2  | 1.398(6)   | C41  | C42  | 1.378(6)  |
| C1  | C6  | 1.411(6)   | F1A  | C7A  | 1.295(5)  |
| C2  | C3  | 1.393(6)   | F2A  | C7A  | 1.347(5)  |
| C2  | C7B | 1.484(6)   | F3A  | C7A  | 1.375(5)  |
| C2  | C7A | 1.484(6)   | F1B  | C8B  | 1.464(15) |
| C3  | C4  | 1.369(6)   | F2B  | C8B  | 1.431(17) |
| C4  | C5  | 1.372(6)   | F3B  | C8B  | 1.150(11) |
| C5  | C6  | 1.392(6)   | O2A  | C47A | 1.564(15) |
| C6  | C8B | 1.495(6)   | O2A  | C50A | 1.586(13) |
| C6  | C8A | 1.495(6)   | C47A | C48A | 1.371(14) |
| C9  | C13 | 1.430(6)   | C48A | C49A | 1.307(13) |
| C9  | C10 | 1.437(6)   | C49A | C50A | 1.373(11) |
| C10 | C11 | 1.421(6)   | O2B  | C50B | 1.587(14) |
| C11 | C12 | 1.407(6)   | O2B  | C47B | 1.589(12) |
| C12 | C13 | 1.407(6)   | C47B | C48B | 1.422(12) |
| C14 | C18 | 1.417(6)   | C48B | C49B | 1.340(11) |
| C14 | C15 | 1.436(6)   | C49B | C50B | 1.338(13) |
| C15 | C16 | 1.411(6)   | O1   | C46  | 1.451(15) |
| C16 | C17 | 1.401(7)   | O1   | C43  | 1.521(18) |
| C17 | C18 | 1.414(6)   | C43  | C44  | 1.466(15) |
| C19 | C20 | 1.384(6)   | C44  | C45  | 1.477(15) |
| C19 | C24 | 1.392(6)   | C45  | C46  | 1.432(14) |
| C20 | C21 | 1.376(6)   |      |      |           |

**Table S49.** Bond Angles for **12**.

| Atom | Atom | Atom | Angle/°    | Atom | Atom | Atom | Angle/°  |
|------|------|------|------------|------|------|------|----------|
| C1   | Ni1  | P2   | 87.29(12)  | C9   | C10  | Fe1  | 68.9(2)  |
| C1   | Ni1  | P1   | 173.13(12) | C12  | C11  | C10  | 107.9(4) |
| P2   | Ni1  | P1   | 97.04(4)   | C12  | C11  | Fe1  | 70.2(2)  |
| C1   | Ni1  | Br1  | 85.94(12)  | C10  | C11  | Fe1  | 68.6(2)  |
| P2   | Ni1  | Br1  | 172.23(4)  | C11  | C12  | C13  | 109.1(4) |
| P1   | Ni1  | Br1  | 90.06(3)   | C11  | C12  | Fe1  | 69.7(2)  |
| C14  | Fe1  | C18  | 41.33(16)  | C13  | C12  | Fe1  | 69.4(2)  |
| C14  | Fe1  | C9   | 106.48(16) | C12  | C13  | C9   | 108.1(4) |
| C18  | Fe1  | C9   | 111.08(17) | C12  | C13  | Fe1  | 70.4(2)  |
| C14  | Fe1  | C10  | 110.20(16) | C9   | C13  | Fe1  | 68.4(2)  |
| C18  | Fe1  | C10  | 141.34(17) | C18  | C14  | C15  | 106.9(4) |
| C9   | Fe1  | C10  | 41.73(16)  | C18  | C14  | P2   | 126.7(3) |
| C14  | Fe1  | C15  | 41.78(16)  | C15  | C14  | P2   | 126.4(3) |
| C18  | Fe1  | C15  | 69.28(18)  | C18  | C14  | Fe1  | 69.5(2)  |
| C9   | Fe1  | C15  | 133.73(16) | C15  | C14  | Fe1  | 69.7(2)  |
| C10  | Fe1  | C15  | 108.03(17) | P2   | C14  | Fe1  | 126.1(2) |
| C14  | Fe1  | C13  | 134.35(17) | C16  | C15  | C14  | 107.8(4) |
| C18  | Fe1  | C13  | 109.94(17) | C16  | C15  | Fe1  | 70.8(2)  |
| C9   | Fe1  | C13  | 41.34(16)  | C14  | C15  | Fe1  | 68.5(2)  |
| C10  | Fe1  | C13  | 69.18(17)  | C17  | C16  | C15  | 108.6(4) |
| C15  | Fe1  | C13  | 174.80(17) | C17  | C16  | Fe1  | 69.6(2)  |
| C14  | Fe1  | C17  | 69.20(16)  | C15  | C16  | Fe1  | 68.7(2)  |
| C18  | Fe1  | C17  | 40.85(17)  | C16  | C17  | C18  | 108.2(4) |
| C9   | Fe1  | C17  | 142.79(18) | C16  | C17  | Fe1  | 70.4(3)  |
| C10  | Fe1  | C17  | 175.46(19) | C18  | C17  | Fe1  | 68.5(2)  |
| C15  | Fe1  | C17  | 68.38(18)  | C17  | C18  | C14  | 108.5(4) |
| C13  | Fe1  | C17  | 114.62(18) | C17  | C18  | Fe1  | 70.7(2)  |
| C14  | Fe1  | C11  | 141.68(17) | C14  | C18  | Fe1  | 69.1(2)  |
| C18  | Fe1  | C11  | 176.93(17) | C20  | C19  | C24  | 118.3(4) |
| C9   | Fe1  | C11  | 69.44(16)  | C20  | C19  | P1   | 120.1(3) |
| C10  | Fe1  | C11  | 40.92(16)  | C24  | C19  | P1   | 121.6(3) |
| C15  | Fe1  | C11  | 112.70(18) | C21  | C20  | C19  | 120.8(4) |
| C13  | Fe1  | C11  | 68.32(17)  | C22  | C21  | C20  | 120.6(5) |
| C17  | Fe1  | C11  | 137.13(18) | C21  | C22  | C23  | 119.5(4) |
| C14  | Fe1  | C12  | 174.56(17) | C22  | C23  | C24  | 120.1(5) |
| C18  | Fe1  | C12  | 136.92(17) | C23  | C24  | C19  | 120.6(4) |
| C9   | Fe1  | C12  | 68.79(16)  | C30  | C25  | C26  | 118.9(4) |
| C10  | Fe1  | C12  | 68.31(17)  | C30  | C25  | P1   | 119.5(3) |
| C15  | Fe1  | C12  | 143.53(17) | C26  | C25  | P1   | 121.2(3) |

|     |     |     |            |      |      |      |           |
|-----|-----|-----|------------|------|------|------|-----------|
| C13 | Fe1 | C12 | 40.26(16)  | C27  | C26  | C25  | 120.3(4)  |
| C17 | Fe1 | C12 | 112.73(17) | C28  | C27  | C26  | 120.3(4)  |
| C11 | Fe1 | C12 | 40.17(17)  | C27  | C28  | C29  | 120.4(4)  |
| C14 | Fe1 | C16 | 69.11(16)  | C28  | C29  | C30  | 120.0(4)  |
| C18 | Fe1 | C16 | 68.30(19)  | C29  | C30  | C25  | 120.2(4)  |
| C9  | Fe1 | C16 | 174.26(17) | C36  | C31  | C32  | 119.6(4)  |
| C10 | Fe1 | C16 | 135.42(19) | C36  | C31  | P2   | 119.9(3)  |
| C15 | Fe1 | C16 | 40.53(16)  | C32  | C31  | P2   | 120.3(3)  |
| C13 | Fe1 | C16 | 144.40(17) | C33  | C32  | C31  | 120.1(4)  |
| C17 | Fe1 | C16 | 40.04(19)  | C34  | C33  | C32  | 120.3(4)  |
| C11 | Fe1 | C16 | 111.50(19) | C33  | C34  | C35  | 119.7(4)  |
| C12 | Fe1 | C16 | 115.78(17) | C34  | C35  | C36  | 120.7(4)  |
| C25 | P1  | C19 | 103.34(18) | C35  | C36  | C31  | 119.5(4)  |
| C25 | P1  | C9  | 97.38(18)  | C42  | C37  | C38  | 118.4(4)  |
| C19 | P1  | C9  | 101.49(19) | C42  | C37  | P2   | 121.9(3)  |
| C25 | P1  | Ni1 | 114.63(14) | C38  | C37  | P2   | 119.6(3)  |
| C19 | P1  | Ni1 | 113.10(14) | C39  | C38  | C37  | 120.7(4)  |
| C9  | P1  | Ni1 | 123.95(13) | C40  | C39  | C38  | 119.8(4)  |
| C14 | P2  | C37 | 104.88(19) | C41  | C40  | C39  | 119.9(4)  |
| C14 | P2  | C31 | 100.30(18) | C40  | C41  | C42  | 120.4(4)  |
| C37 | P2  | C31 | 102.97(18) | C41  | C42  | C37  | 120.7(4)  |
| C14 | P2  | Ni1 | 114.61(14) | F1A  | C7A  | F2A  | 108.0(4)  |
| C37 | P2  | Ni1 | 113.61(14) | F1A  | C7A  | F3A  | 106.1(4)  |
| C31 | P2  | Ni1 | 118.61(13) | F2A  | C7A  | F3A  | 103.3(4)  |
| C2  | C1  | C6  | 116.2(4)   | F1A  | C7A  | C2   | 115.8(4)  |
| C2  | C1  | Ni1 | 123.9(3)   | F2A  | C7A  | C2   | 111.5(4)  |
| C6  | C1  | Ni1 | 119.8(3)   | F3A  | C7A  | C2   | 111.3(4)  |
| C3  | C2  | C1  | 121.9(4)   | F3B  | C8B  | F2B  | 118.0(10) |
| C3  | C2  | C7B | 116.1(4)   | F3B  | C8B  | F1B  | 111.3(10) |
| C1  | C2  | C7B | 121.9(4)   | F2B  | C8B  | F1B  | 93.9(9)   |
| C3  | C2  | C7A | 116.1(4)   | F3B  | C8B  | C6   | 121.4(7)  |
| C1  | C2  | C7A | 121.9(4)   | F2B  | C8B  | C6   | 105.1(7)  |
| C4  | C3  | C2  | 120.7(4)   | F1B  | C8B  | C6   | 102.7(7)  |
| C3  | C4  | C5  | 118.9(4)   | C47A | O2A  | C50A | 94.2(13)  |
| C4  | C5  | C6  | 121.3(4)   | C48A | C47A | O2A  | 104.7(13) |
| C5  | C6  | C1  | 120.8(4)   | C49A | C48A | C47A | 115.0(15) |
| C5  | C6  | C8B | 117.9(4)   | C48A | C49A | C50A | 101.9(12) |
| C1  | C6  | C8B | 121.2(4)   | C49A | C50A | O2A  | 105.3(12) |
| C5  | C6  | C8A | 117.9(4)   | C50B | O2B  | C47B | 95.9(11)  |
| C1  | C6  | C8A | 121.2(4)   | C48B | C47B | O2B  | 105.8(10) |
| C13 | C9  | C10 | 107.0(4)   | C49B | C48B | C47B | 110.1(10) |
| C13 | C9  | P1  | 124.6(3)   | C50B | C49B | C48B | 111.6(12) |

|     |     |     |          |      |      |     |           |
|-----|-----|-----|----------|------|------|-----|-----------|
| C10 | C9  | P1  | 128.4(3) | C49B | C50B | O2B | 105.6(13) |
| C13 | C9  | Fe1 | 70.3(2)  | C46  | O1   | C43 | 107.6(10) |
| C10 | C9  | Fe1 | 69.4(2)  | C44  | C43  | O1  | 100.4(11) |
| P1  | C9  | Fe1 | 123.9(2) | C43  | C44  | C45 | 104.1(13) |
| C11 | C10 | C9  | 107.9(4) | C46  | C45  | C44 | 104.0(12) |
| C11 | C10 | Fe1 | 70.4(2)  | C45  | C46  | O1  | 106.5(11) |

*X-ray Diffraction Data for (dppf)Ni(2,6-dimethyl-4-fluorophenyl)(Br) (13)*

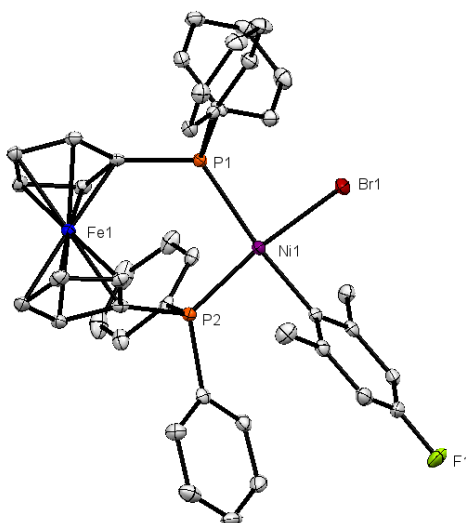

**Figure S62.** ORTEP of **13**, with ellipsoids shown at 50% probability. Hydrogen atoms and solvent of crystallization have been removed for clarity.

Crystals suitable for X-ray diffraction were grown from a concentrated solution of **13** in THF layered with pentane at  $-15\text{ }^{\circ}\text{C}$ . Low-temperature diffraction data ( $\omega$ -scans) were collected on a Rigaku SCX Mini diffractometer coupled to a Rigaku Mercury275R CCD with Mo  $K\alpha$  radiation ( $\lambda = 0.71073\text{ \AA}$ ) for the structure of **13** (Figure S62). The diffraction images were processed and scaled using Rigaku Oxford Diffraction software.<sup>10</sup> The structure was solved with SHELXT and was refined against  $F^2$  on all data by full-matrix least squares with SHELXL.<sup>11</sup> All non-hydrogen atoms were refined anisotropically. Hydrogen atoms were included in the model at geometrically calculated positions and refined using a riding model. The isotropic displacement parameters of all hydrogen atoms were fixed to 1.2 times the U value of the atoms to which they are linked (1.5 times for methyl groups). Ten reflections were omitted in which the Error/esd value was abnormally high. These reflections were located close to the beamstop. The full numbering scheme of compound **13** can be found in the full details of the X-ray structure determination (CIF), which

is included as Supporting Information. CCDC number 1860564 contains the supplementary crystallographic data for this paper. These data can be obtained free of charge from The Cambridge Crystallographic Data Center via [www.ccdc.cam.ac.uk/data\\_request/cif](http://www.ccdc.cam.ac.uk/data_request/cif).

**Table S50.** Crystal data and structure refinement for **13**.

|                                    |                                                               |
|------------------------------------|---------------------------------------------------------------|
| Empirical formula                  | C <sub>46</sub> H <sub>44</sub> BrFFeNiOP <sub>2</sub>        |
| Formula weight                     | 888.22                                                        |
| Temperature/K                      | 93.15                                                         |
| Crystal system                     | monoclinic                                                    |
| Space group                        | P2 <sub>1</sub> /n                                            |
| a/Å                                | 11.7586(3)                                                    |
| b/Å                                | 18.9665(5)                                                    |
| c/Å                                | 17.0364(5)                                                    |
| α/°                                | 90                                                            |
| β/°                                | 104.395(3)                                                    |
| γ/°                                | 90                                                            |
| Volume/Å <sup>3</sup>              | 3680.16(18)                                                   |
| Z                                  | 4                                                             |
| ρ <sub>calc</sub> /cm <sup>3</sup> | 1.603                                                         |
| μ/mm <sup>-1</sup>                 | 2.122                                                         |
| F(000)                             | 1824.0                                                        |
| Crystal size/mm <sup>3</sup>       | 0.02 × 0.02 × 0.01                                            |
| Radiation                          | MoKα (λ = 0.71073)                                            |
| 2θ range for data collection/°     | 4.37 to 50.054                                                |
| Index ranges                       | -13 ≤ h ≤ 13, -22 ≤ k ≤ 22, -20 ≤ l ≤ 20                      |
| Reflections collected              | 52476                                                         |
| Independent reflections            | 6494 [R <sub>int</sub> = 0.0547, R <sub>sigma</sub> = 0.0273] |
| Data/restraints/parameters         | 6494/0/480                                                    |
| Goodness-of-fit on F <sup>2</sup>  | 1.044                                                         |
| Final R indexes [I >= 2σ (I)]      | R <sub>1</sub> = 0.0269, wR <sub>2</sub> = 0.0621             |
| Final R indexes [all data]         | R <sub>1</sub> = 0.0375, wR <sub>2</sub> = 0.0672             |

**Table S51.** Fractional Atomic Coordinates (×10<sup>4</sup>) and Equivalent Isotropic Displacement Parameters (Å<sup>2</sup>×10<sup>3</sup>) for **13**. U<sub>eq</sub> is defined as 1/3 of the trace of the orthogonalised U<sub>ij</sub> tensor.

| Atom | x         | y         | z         | U(eq)     |
|------|-----------|-----------|-----------|-----------|
| Br1  | 3604.3(2) | 5185.8(2) | 2664.0(2) | 16.86(7)  |
| Ni1  | 2738.1(3) | 4108.5(2) | 2794.2(2) | 10.34(8)  |
| Fe1  | 1282.1(3) | 2487.9(2) | 1184.6(2) | 10.61(9)  |
| P1   | 3289.2(5) | 3737.0(3) | 1660.4(4) | 10.73(13) |
| P2   | 1908.6(5) | 3156.9(3) | 3058.0(4) | 10.45(13) |

|     |            |            |            |         |
|-----|------------|------------|------------|---------|
| F1  | 1655.7(14) | 5358.9(8)  | 5758.3(9)  | 26.3(4) |
| C1  | 2405(2)    | 4500.8(12) | 3748.4(14) | 12.5(5) |
| C2  | 1325(2)    | 4816.2(12) | 3693.6(15) | 14.3(5) |
| C3  | 1072(2)    | 5109.3(13) | 4375.2(15) | 17.6(5) |
| C4  | 1912(2)    | 5083.4(13) | 5087.6(15) | 18.9(6) |
| C5  | 2986(2)    | 4798.3(13) | 5156.7(15) | 15.8(5) |
| C6  | 3246(2)    | 4504.5(13) | 4479.7(14) | 14.0(5) |
| C7  | 415(2)     | 4842.7(14) | 2910.2(15) | 20.6(6) |
| C8  | 4425(2)    | 4179.4(14) | 4569.2(15) | 17.0(5) |
| C9  | 4870(2)    | 3655.5(12) | 1803.5(14) | 12.8(5) |
| C10 | 5647(2)    | 3896.9(13) | 2491.9(15) | 15.9(5) |
| C11 | 6837(2)    | 3822.7(14) | 2585.6(15) | 19.8(6) |
| C12 | 7253(2)    | 3518.7(14) | 1983.8(15) | 18.9(6) |
| C13 | 6488(2)    | 3280.0(13) | 1295.4(15) | 17.1(5) |
| C14 | 5300(2)    | 3344.2(13) | 1207.3(14) | 14.8(5) |
| C15 | 2895(2)    | 4381.2(12) | 847.0(14)  | 12.3(5) |
| C16 | 1741(2)    | 4461.2(13) | 416.8(14)  | 14.7(5) |
| C17 | 1442(2)    | 4960.2(13) | -181.5(15) | 17.4(5) |
| C18 | 2278(2)    | 5391.1(14) | -351.5(15) | 19.7(6) |
| C19 | 3421(2)    | 5328.1(14) | 83.1(15)   | 19.5(6) |
| C20 | 3728(2)    | 4823.5(13) | 676.3(15)  | 17.0(5) |
| C21 | 1091(2)    | 3128.0(12) | 3826.6(14) | 12.8(5) |
| C22 | -108(2)    | 3053.5(13) | 3632.0(15) | 17.5(5) |
| C23 | -716(2)    | 3069.8(14) | 4225.1(16) | 21.3(6) |
| C24 | -126(2)    | 3168.5(13) | 5016.2(16) | 21.2(6) |
| C25 | 1076(2)    | 3234.0(13) | 5217.0(15) | 20.2(6) |
| C26 | 1679(2)    | 3201.8(13) | 4630.0(14) | 15.2(5) |
| C27 | 3004(2)    | 2483.3(12) | 3395.9(13) | 12.3(5) |
| C28 | 4151(2)    | 2637.0(13) | 3397.3(14) | 15.1(5) |
| C29 | 4991(2)    | 2120.1(14) | 3545.2(15) | 20.2(6) |
| C30 | 4688(2)    | 1449.4(15) | 3687.3(16) | 25.6(6) |
| C31 | 3560(3)    | 1292.7(14) | 3715.8(16) | 26.2(7) |
| C32 | 2720(2)    | 1809.2(13) | 3583.3(14) | 17.7(6) |
| C33 | 2809(2)    | 2922.1(12) | 1130.4(14) | 11.6(5) |
| C34 | 2098(2)    | 2825.8(13) | 333.4(14)  | 13.2(5) |
| C35 | 1838(2)    | 2106.8(13) | 216.6(14)  | 13.7(5) |
| C36 | 2388(2)    | 1743.8(13) | 925.3(14)  | 13.8(5) |
| C37 | 2997(2)    | 2239.7(13) | 1484.7(14) | 13.3(5) |
| C38 | 870(2)     | 2799.6(12) | 2191.9(14) | 11.5(5) |
| C39 | 500(2)     | 2094.1(13) | 2012.8(14) | 13.9(5) |
| C40 | -303(2)    | 2088.4(14) | 1247.6(15) | 16.1(5) |
| C41 | -442(2)    | 2779.3(14) | 947.7(15)  | 16.1(5) |

|     |         |            |            |          |
|-----|---------|------------|------------|----------|
| C42 | 271(2)  | 3221.8(13) | 1527.8(14) | 13.1(5)  |
| O1  | 7538(2) | 1668.7(13) | 3384.7(13) | 46.9(6)  |
| C43 | 8496(3) | 1228.0(17) | 3698.4(19) | 36.0(8)  |
| C44 | 8445(4) | 659(2)     | 3095(2)    | 56.0(11) |
| C45 | 7772(3) | 958.7(17)  | 2322.7(19) | 37.7(8)  |
| C46 | 7244(4) | 1598(2)    | 2542(2)    | 64.4(13) |

**Table S52.** Anisotropic Displacement Parameters ( $\text{\AA}^2 \times 10^3$ ) for **13**. The Anisotropic displacement factor exponent takes the form:  $-2\pi^2[h^2a^{*2}U_{11}+2hka^*b^*U_{12}+\dots]$ .

| Atom | U <sub>11</sub> | U <sub>22</sub> | U <sub>33</sub> | U <sub>23</sub> | U <sub>13</sub> | U <sub>12</sub> |
|------|-----------------|-----------------|-----------------|-----------------|-----------------|-----------------|
| Br1  | 24.59(15)       | 10.24(13)       | 17.81(13)       | -0.48(10)       | 9.18(10)        | -3.87(10)       |
| Ni1  | 11.89(16)       | 8.94(16)        | 10.72(15)       | 0.00(12)        | 3.83(12)        | -0.77(12)       |
| Fe1  | 9.84(17)        | 10.99(18)       | 11.24(17)       | -0.97(13)       | 3.09(13)        | -0.66(14)       |
| P1   | 10.6(3)         | 10.8(3)         | 10.9(3)         | 0.2(2)          | 2.9(2)          | -1.1(2)         |
| P2   | 11.1(3)         | 10.2(3)         | 10.2(3)         | 0.1(2)          | 3.0(2)          | -0.4(2)         |
| F1   | 29.8(9)         | 31.5(9)         | 21.6(8)         | -13.4(7)        | 13.7(7)         | -3.2(7)         |
| C1   | 15.9(13)        | 8.5(12)         | 14.8(12)        | -0.3(9)         | 6.9(10)         | -1.7(10)        |
| C2   | 16.5(13)        | 9.8(12)         | 17.8(12)        | 0.3(10)         | 6.6(10)         | -1.0(10)        |
| C3   | 18.1(13)        | 12.8(13)        | 24.5(14)        | -1.8(10)        | 10.0(11)        | -0.4(10)        |
| C4   | 26.8(15)        | 14.7(13)        | 19.2(13)        | -6.4(10)        | 13.4(12)        | -7.6(11)        |
| C5   | 17.9(13)        | 14.2(13)        | 15.5(12)        | -1.7(10)        | 4.3(10)         | -6.6(11)        |
| C6   | 16.2(13)        | 9.9(12)         | 16.8(13)        | 0.2(10)         | 6.0(10)         | -4.2(10)        |
| C7   | 19.9(14)        | 22.3(15)        | 19.1(13)        | -0.3(11)        | 3.6(11)         | 4.9(11)         |
| C8   | 17.2(13)        | 17.6(14)        | 15.6(13)        | -1.3(10)        | 3.1(10)         | -1.3(11)        |
| C9   | 13.9(12)        | 10.4(12)        | 14.0(12)        | 4.0(9)          | 3.5(10)         | -1.5(10)        |
| C10  | 16.1(13)        | 17.2(13)        | 15.0(12)        | 0.6(10)         | 5.0(10)         | -0.7(11)        |
| C11  | 15.6(13)        | 22.3(14)        | 18.6(13)        | 1.0(11)         | -1.4(11)        | -3.7(11)        |
| C12  | 12.0(12)        | 19.6(14)        | 24.9(14)        | 6.1(11)         | 4.4(11)         | 1.5(11)         |
| C13  | 18.1(13)        | 16.1(13)        | 20.4(13)        | 0.6(11)         | 10.7(11)        | 1.3(11)         |
| C14  | 15.9(13)        | 13.5(12)        | 15.1(12)        | -1.0(10)        | 3.7(10)         | -2.4(10)        |
| C15  | 16.9(13)        | 11.3(12)        | 9.9(11)         | -1.5(9)         | 5.3(10)         | 0.8(10)         |
| C16  | 15.2(13)        | 13.3(13)        | 16.4(12)        | -1.7(10)        | 5.4(10)         | -2.7(10)        |
| C17  | 16.5(13)        | 16.3(13)        | 18.7(13)        | 0.2(10)         | 3.1(11)         | 2.1(11)         |
| C18  | 26.2(15)        | 17.4(14)        | 16.7(13)        | 7.3(10)         | 7.6(11)         | 3.6(11)         |
| C19  | 20.5(14)        | 18.3(14)        | 22.2(14)        | 5.7(11)         | 9.8(11)         | -1.2(11)        |
| C20  | 16.6(13)        | 17.7(13)        | 17.2(13)        | 0.6(11)         | 4.8(10)         | -2.5(11)        |
| C21  | 16.7(13)        | 7.2(12)         | 15.0(12)        | 1.7(9)          | 5.1(10)         | 0.6(10)         |
| C22  | 16.3(13)        | 20.6(14)        | 16.4(13)        | 1.9(10)         | 5.9(11)         | 1.0(11)         |
| C23  | 17.8(14)        | 21.4(14)        | 27.5(15)        | 4.3(11)         | 11.0(12)        | 0.7(11)         |
| C24  | 29.3(15)        | 18.0(14)        | 23.0(14)        | 1.6(11)         | 18.9(12)        | 1.2(12)         |
| C25  | 32.1(16)        | 15.6(13)        | 14.5(13)        | -1.2(10)        | 8.7(11)         | -4.6(12)        |
| C26  | 17.1(13)        | 12.5(13)        | 16.1(12)        | 1.3(10)         | 4.3(10)         | -3.0(10)        |

|     |          |          |          |           |          |          |
|-----|----------|----------|----------|-----------|----------|----------|
| C27 | 16.1(12) | 12.9(12) | 6.6(11)  | -0.9(9)   | 0.0(9)   | 2.3(10)  |
| C28 | 16.7(13) | 16.7(13) | 10.3(12) | -2.7(10)  | 0.3(10)  | 0.1(10)  |
| C29 | 16.5(13) | 24.8(15) | 15.7(13) | -3.9(11)  | -2.6(11) | 6.0(11)  |
| C30 | 27.0(15) | 21.8(15) | 21.6(14) | -2.6(11)  | -6.2(12) | 11.2(12) |
| C31 | 37.4(17) | 13.5(14) | 21.1(14) | 1.8(11)   | -5.0(13) | 2.8(12)  |
| C32 | 20.0(13) | 14.8(13) | 15.3(12) | 1.4(10)   | -1.0(11) | -1.5(11) |
| C33 | 10.4(12) | 12.6(12) | 13.4(12) | -2.0(10)  | 6.0(10)  | -1.4(10) |
| C34 | 11.2(12) | 17.9(13) | 11.8(12) | 0.2(10)   | 4.9(10)  | -0.4(10) |
| C35 | 11.5(12) | 15.8(13) | 14.6(12) | -4.1(10)  | 4.8(10)  | -1.9(10) |
| C36 | 11.8(12) | 12.5(12) | 18.3(12) | -4.2(10)  | 6.0(10)  | 1.2(10)  |
| C37 | 9.7(12)  | 17.7(13) | 12.4(12) | -1.5(10)  | 2.5(10)  | 1.4(10)  |
| C38 | 11.4(12) | 12.9(12) | 11.6(12) | 1.3(9)    | 5.3(10)  | 0.7(10)  |
| C39 | 13.5(12) | 13.8(13) | 16.5(12) | -1.3(10)  | 7.7(10)  | -2.2(10) |
| C40 | 12.2(12) | 20.0(14) | 18.3(13) | -6.7(10)  | 7.7(10)  | -5.3(10) |
| C41 | 9.5(12)  | 22.7(14) | 16.5(13) | -2.8(10)  | 4.3(10)  | 2.0(10)  |
| C42 | 11.4(12) | 15.4(13) | 13.2(12) | -0.1(10)  | 4.6(10)  | 2.9(10)  |
| O1  | 39.5(13) | 62.9(16) | 32.4(12) | -14.4(11) | -2.1(10) | 27.7(12) |
| C43 | 35.9(18) | 33.7(18) | 35.0(17) | 8.1(14)   | 2.4(14)  | 9.5(15)  |
| C44 | 87(3)    | 45(2)    | 40(2)    | 6.2(17)   | 24(2)    | 31(2)    |
| C45 | 37.4(18) | 40.0(19) | 35.0(18) | -4.7(15)  | 7.6(15)  | -3.7(15) |
| C46 | 98(3)    | 56(3)    | 30.4(19) | -2.9(18)  | 0(2)     | 43(2)    |

**Table S53.** Bond Lengths for **13**.

| Atom | Atom | Length/Å  | Atom | Atom | Length/Å |
|------|------|-----------|------|------|----------|
| Br1  | Ni1  | 2.3182(4) | C13  | C14  | 1.372(3) |
| Ni1  | P1   | 2.2957(7) | C15  | C16  | 1.380(3) |
| Ni1  | P2   | 2.1515(7) | C15  | C20  | 1.375(3) |
| Ni1  | C1   | 1.914(2)  | C16  | C17  | 1.371(3) |
| Fe1  | C33  | 1.998(2)  | C17  | C18  | 1.364(4) |
| Fe1  | C34  | 2.031(2)  | C18  | C19  | 1.368(4) |
| Fe1  | C35  | 2.051(2)  | C19  | C20  | 1.373(4) |
| Fe1  | C36  | 2.041(2)  | C21  | C22  | 1.373(3) |
| Fe1  | C37  | 2.009(2)  | C21  | C26  | 1.379(3) |
| Fe1  | C38  | 1.985(2)  | C22  | C23  | 1.376(4) |
| Fe1  | C39  | 2.010(2)  | C23  | C24  | 1.367(4) |
| Fe1  | C40  | 2.039(2)  | C24  | C25  | 1.375(4) |
| Fe1  | C41  | 2.043(2)  | C25  | C26  | 1.363(4) |
| Fe1  | C42  | 2.010(2)  | C27  | C28  | 1.378(3) |
| P1   | C9   | 1.820(2)  | C27  | C32  | 1.379(3) |
| P1   | C15  | 1.819(2)  | C28  | C29  | 1.370(3) |
| P1   | C33  | 1.808(2)  | C29  | C30  | 1.359(4) |
| P2   | C21  | 1.808(2)  | C30  | C31  | 1.372(4) |



|     |     |          |     |     |          |
|-----|-----|----------|-----|-----|----------|
| P2  | C27 | 1.804(2) | C31 | C32 | 1.369(4) |
| P2  | C38 | 1.797(2) | C33 | C34 | 1.419(3) |
| F1  | C4  | 1.356(3) | C33 | C37 | 1.422(3) |
| C1  | C2  | 1.386(3) | C34 | C35 | 1.401(3) |
| C1  | C6  | 1.385(3) | C35 | C36 | 1.401(3) |
| C2  | C3  | 1.385(3) | C36 | C37 | 1.402(3) |
| C2  | C7  | 1.490(3) | C38 | C39 | 1.417(3) |
| C3  | C4  | 1.362(4) | C38 | C42 | 1.422(3) |
| C4  | C5  | 1.352(4) | C39 | C40 | 1.407(3) |
| C5  | C6  | 1.382(3) | C40 | C41 | 1.401(4) |
| C6  | C8  | 1.490(3) | C41 | C42 | 1.404(3) |
| C9  | C10 | 1.374(3) | O1  | C43 | 1.398(4) |
| C9  | C14 | 1.376(3) | O1  | C46 | 1.397(4) |
| C10 | C11 | 1.375(4) | C43 | C44 | 1.482(5) |
| C11 | C12 | 1.369(4) | C44 | C45 | 1.471(5) |
| C12 | C13 | 1.366(4) | C45 | C46 | 1.453(5) |

**Table S54.** Bond Angles for **13**.

| Atom | Atom | Atom | Angle/°    | Atom | Atom | Atom | Angle/°    |
|------|------|------|------------|------|------|------|------------|
| P1   | Ni1  | Br1  | 88.127(19) | C5   | C6   | C1   | 119.8(2)   |
| P2   | Ni1  | Br1  | 172.84(2)  | C5   | C6   | C8   | 118.3(2)   |
| P2   | Ni1  | P1   | 98.96(2)   | C10  | C9   | P1   | 121.77(19) |
| C1   | Ni1  | Br1  | 85.77(7)   | C10  | C9   | C14  | 119.0(2)   |
| C1   | Ni1  | P1   | 173.59(7)  | C14  | C9   | P1   | 119.24(18) |
| C1   | Ni1  | P2   | 87.12(7)   | C9   | C10  | C11  | 120.4(2)   |
| C33  | Fe1  | C34  | 41.22(9)   | C12  | C11  | C10  | 120.0(2)   |
| C33  | Fe1  | C35  | 68.79(9)   | C13  | C12  | C11  | 120.0(2)   |
| C33  | Fe1  | C36  | 69.31(10)  | C12  | C13  | C14  | 120.0(2)   |
| C33  | Fe1  | C37  | 41.56(10)  | C13  | C14  | C9   | 120.6(2)   |
| C33  | Fe1  | C39  | 139.35(10) | C16  | C15  | P1   | 120.61(19) |
| C33  | Fe1  | C40  | 177.46(10) | C20  | C15  | P1   | 120.71(19) |
| C33  | Fe1  | C41  | 137.60(10) | C20  | C15  | C16  | 118.6(2)   |
| C33  | Fe1  | C42  | 109.36(10) | C17  | C16  | C15  | 120.5(2)   |
| C34  | Fe1  | C35  | 40.13(10)  | C18  | C17  | C16  | 120.4(2)   |
| C34  | Fe1  | C36  | 67.92(10)  | C17  | C18  | C19  | 119.7(2)   |
| C34  | Fe1  | C40  | 139.00(10) | C18  | C19  | C20  | 120.1(2)   |
| C34  | Fe1  | C41  | 113.28(10) | C19  | C20  | C15  | 120.7(2)   |
| C36  | Fe1  | C35  | 40.03(10)  | C22  | C21  | P2   | 121.83(19) |
| C36  | Fe1  | C41  | 143.05(10) | C22  | C21  | C26  | 118.8(2)   |
| C37  | Fe1  | C34  | 68.49(10)  | C26  | C21  | P2   | 119.36(19) |
| C37  | Fe1  | C35  | 67.76(10)  | C21  | C22  | C23  | 120.7(2)   |
| C37  | Fe1  | C36  | 40.50(9)   | C24  | C23  | C22  | 119.9(2)   |

|     |     |     |            |     |     |     |            |
|-----|-----|-----|------------|-----|-----|-----|------------|
| C37 | Fe1 | C40 | 140.55(10) | C23 | C24 | C25 | 119.7(2)   |
| C37 | Fe1 | C41 | 176.22(10) | C26 | C25 | C24 | 120.2(2)   |
| C37 | Fe1 | C42 | 135.83(10) | C25 | C26 | C21 | 120.6(2)   |
| C38 | Fe1 | C33 | 109.40(10) | C28 | C27 | P2  | 118.11(18) |
| C38 | Fe1 | C34 | 141.55(10) | C28 | C27 | C32 | 119.3(2)   |
| C38 | Fe1 | C35 | 174.26(10) | C32 | C27 | P2  | 122.36(19) |
| C38 | Fe1 | C36 | 134.31(10) | C29 | C28 | C27 | 120.6(2)   |
| C38 | Fe1 | C37 | 107.15(10) | C30 | C29 | C28 | 119.6(3)   |
| C38 | Fe1 | C39 | 41.54(10)  | C29 | C30 | C31 | 120.5(3)   |
| C38 | Fe1 | C40 | 69.07(10)  | C32 | C31 | C30 | 120.2(3)   |
| C38 | Fe1 | C41 | 69.32(10)  | C31 | C32 | C27 | 119.7(3)   |
| C38 | Fe1 | C42 | 41.69(9)   | P1  | C33 | Fe1 | 120.12(12) |
| C39 | Fe1 | C34 | 176.56(10) | C34 | C33 | Fe1 | 70.63(13)  |
| C39 | Fe1 | C35 | 136.59(10) | C34 | C33 | P1  | 128.66(18) |
| C39 | Fe1 | C36 | 108.80(10) | C34 | C33 | C37 | 106.4(2)   |
| C39 | Fe1 | C37 | 109.86(10) | C37 | C33 | Fe1 | 69.64(13)  |
| C39 | Fe1 | C40 | 40.66(10)  | C37 | C33 | P1  | 124.73(18) |
| C39 | Fe1 | C41 | 68.56(10)  | C33 | C34 | Fe1 | 68.15(13)  |
| C39 | Fe1 | C42 | 69.28(10)  | C35 | C34 | Fe1 | 70.70(14)  |
| C40 | Fe1 | C35 | 112.93(10) | C35 | C34 | C33 | 108.5(2)   |
| C40 | Fe1 | C36 | 113.23(10) | C34 | C35 | Fe1 | 69.16(14)  |
| C40 | Fe1 | C41 | 40.16(10)  | C34 | C35 | C36 | 108.6(2)   |
| C41 | Fe1 | C35 | 115.84(10) | C36 | C35 | Fe1 | 69.59(14)  |
| C42 | Fe1 | C34 | 114.07(10) | C35 | C36 | Fe1 | 70.38(14)  |
| C42 | Fe1 | C35 | 143.91(10) | C35 | C36 | C37 | 107.7(2)   |
| C42 | Fe1 | C36 | 175.58(9)  | C37 | C36 | Fe1 | 68.54(14)  |
| C42 | Fe1 | C40 | 68.13(10)  | C33 | C37 | Fe1 | 68.80(13)  |
| C42 | Fe1 | C41 | 40.54(10)  | C36 | C37 | Fe1 | 70.96(14)  |
| C9  | P1  | Ni1 | 113.94(8)  | C36 | C37 | C33 | 108.8(2)   |
| C15 | P1  | Ni1 | 111.28(8)  | P2  | C38 | Fe1 | 124.06(13) |
| C15 | P1  | C9  | 102.58(11) | C39 | C38 | Fe1 | 70.15(14)  |
| C33 | P1  | Ni1 | 124.34(8)  | C39 | C38 | P2  | 129.97(18) |
| C33 | P1  | C9  | 100.14(11) | C39 | C38 | C42 | 107.2(2)   |
| C33 | P1  | C15 | 101.82(11) | C42 | C38 | Fe1 | 70.08(13)  |
| C21 | P2  | Ni1 | 121.81(8)  | C42 | C38 | P2  | 122.83(18) |
| C27 | P2  | Ni1 | 109.63(8)  | C38 | C39 | Fe1 | 68.31(13)  |
| C27 | P2  | C21 | 102.34(11) | C40 | C39 | Fe1 | 70.80(14)  |
| C38 | P2  | Ni1 | 113.29(8)  | C40 | C39 | C38 | 107.8(2)   |
| C38 | P2  | C21 | 102.02(11) | C39 | C40 | Fe1 | 68.55(14)  |
| C38 | P2  | C27 | 106.28(11) | C41 | C40 | Fe1 | 70.07(14)  |
| C2  | C1  | Ni1 | 119.21(18) | C41 | C40 | C39 | 108.8(2)   |
| C6  | C1  | Ni1 | 120.99(18) | C40 | C41 | Fe1 | 69.78(14)  |

|    |    |    |          |     |     |     |           |
|----|----|----|----------|-----|-----|-----|-----------|
| C6 | C1 | C2 | 119.7(2) | C40 | C41 | C42 | 107.9(2)  |
| C1 | C2 | C7 | 121.1(2) | C42 | C41 | Fe1 | 68.46(14) |
| C3 | C2 | C1 | 120.1(2) | C38 | C42 | Fe1 | 68.23(13) |
| C3 | C2 | C7 | 118.8(2) | C41 | C42 | Fe1 | 71.00(14) |
| C4 | C3 | C2 | 118.3(2) | C41 | C42 | C38 | 108.3(2)  |
| F1 | C4 | C3 | 118.3(2) | C46 | O1  | C43 | 107.8(3)  |
| C5 | C4 | F1 | 118.6(2) | O1  | C43 | C44 | 106.3(3)  |
| C5 | C4 | C3 | 123.1(2) | C45 | C44 | C43 | 105.0(3)  |
| C4 | C5 | C6 | 119.0(2) | C46 | C45 | C44 | 105.2(3)  |
| C1 | C6 | C8 | 121.9(2) | O1  | C46 | C45 | 109.4(3)  |

*X-ray Diffraction Data for (dppf)Ni(mesityl)(Br) (14)*

Crystals suitable for X-ray diffraction were grown from a concentrated solution of **14** in dichloromethane layered with hexanes at -15 °C. Low-temperature diffraction data ( $\omega$ -scans) were collected on a Rigaku SCX Mini diffractometer coupled to a Rigaku Mercury275R CCD with Mo K $\alpha$  radiation ( $\lambda = 0.71073$  Å) for the structure of **14**. The diffraction images were processed and scaled using Rigaku Oxford Diffraction software.<sup>10</sup> The structure was solved with SHELXT and was refined against F<sup>2</sup> on all data by full-matrix least squares with SHELXL.<sup>11</sup> The crystal chosen for data collection was twinned; as such, the reflections were integrated accounting for an approximately 11% contribution from a twin model. All non-hydrogen atoms were refined anisotropically. Hydrogen atoms were included in the model at geometrically calculated positions and refined using a riding model. The isotropic displacement parameters of all hydrogen atoms were fixed to 1.2 times the U value of the atoms to which they are linked (1.5 times for methyl groups). The molecule of dichloromethane appearing in the asymmetric unit was disordered and was modelled by splitting the positions of the chlorines in the molecule, with each chlorine at half occupancy. Three reflections were omitted in which the Error/esd value was abnormally high. These reflections were located close to the beamstop. The full numbering scheme of compound **14** can be found in the full details of the X-ray structure determination (CIF), which is included as Supporting Information. CCDC number 1860572 contains the supplementary crystallographic data for this paper. These data can be obtained free of charge from The Cambridge Crystallographic Data Center via [www.ccdc.cam.ac.uk/data\\_request/cif](http://www.ccdc.cam.ac.uk/data_request/cif).

**Table S55.** Crystal data and structure refinement for **14**.

Empirical formula                      C<sub>44</sub>H<sub>41</sub>BrCl<sub>2</sub>FeNiP<sub>2</sub>

|                                      |                                                               |
|--------------------------------------|---------------------------------------------------------------|
| Formula weight                       | 897.08                                                        |
| Temperature/K                        | 93(2)                                                         |
| Crystal system                       | monoclinic                                                    |
| Space group                          | P2 <sub>1</sub> /c                                            |
| a/Å                                  | 22.4429(10)                                                   |
| b/Å                                  | 9.3655(3)                                                     |
| c/Å                                  | 18.4857(8)                                                    |
| α/°                                  | 90                                                            |
| β/°                                  | 106.677(5)                                                    |
| γ/°                                  | 90                                                            |
| Volume/Å <sup>3</sup>                | 3722.1(3)                                                     |
| Z                                    | 4                                                             |
| ρ <sub>calc</sub> /g/cm <sup>3</sup> | 1.601                                                         |
| μ/mm <sup>-1</sup>                   | 2.232                                                         |
| F(000)                               | 1832.0                                                        |
| Crystal size/mm <sup>3</sup>         | 0.200 × 0.100 × 0.080                                         |
| Radiation                            | MoKα (λ = 0.71073)                                            |
| 2θ range for data collection/°       | 5.03 to 50.152                                                |
| Index ranges                         | -26 ≤ h ≤ 26, -11 ≤ k ≤ 11, -20 ≤ l ≤ 22                      |
| Reflections collected                | 6561                                                          |
| Independent reflections              | 6561 [R <sub>int</sub> = 0.1355, R <sub>sigma</sub> = 0.0522] |
| Data/restraints/parameters           | 6561/0/483                                                    |
| Goodness-of-fit on F <sup>2</sup>    | 1.174                                                         |

**Table S56.** Fractional Atomic Coordinates ( $\times 10^4$ ) and Equivalent Isotropic Displacement Parameters ( $\text{\AA}^2 \times 10^3$ ) for **14**.  $U_{\text{eq}}$  is defined as 1/3 of the trace of the orthogonalised  $U_{\text{H}}$  tensor.

| Atom | x         | y          | z         | U(eq)     |
|------|-----------|------------|-----------|-----------|
| Br1  | 7572.8(3) | -480.9(6)  | 7526.2(4) | 17.06(16) |
| Ni1  | 7195.8(3) | 1777.1(8)  | 7100.7(4) | 11.10(18) |
| Fe1  | 7907.0(4) | 5391.8(9)  | 6226.6(5) | 12.7(2)   |
| P1   | 8182.0(7) | 2557.9(17) | 7380.1(8) | 12.0(3)   |
| P2   | 6705.8(7) | 3703.7(16) | 6639.4(8) | 11.7(3)   |
| C1   | 6391(3)   | 961(6)     | 6950(3)   | 12.2(12)  |
| C2   | 6098(3)   | 343(6)     | 6263(3)   | 15.2(13)  |
| C3   | 5505(3)   | -194(6)    | 6127(3)   | 15.4(13)  |
| C4   | 5190(3)   | -152(6)    | 6664(3)   | 15.9(13)  |
| C5   | 5504(3)   | 387(6)     | 7365(3)   | 16.2(13)  |
| C6   | 6099(3)   | 919(7)     | 7521(3)   | 15.4(13)  |
| C7   | 6427(3)   | 229(7)     | 5664(3)   | 18.2(13)  |
| C8   | 4550(3)   | -741(8)    | 6511(4)   | 25.2(15)  |
| C9   | 6433(3)   | 1379(7)    | 8315(3)   | 17.5(13)  |

|      |            |          |         |          |
|------|------------|----------|---------|----------|
| C10  | 8650(3)    | 1351(6)  | 7004(3) | 16.4(13) |
| C11  | 9263(3)    | 1062(7)  | 7365(4) | 20.9(14) |
| C12  | 9597(3)    | 131(8)   | 7043(4) | 24.2(15) |
| C13  | 9319(3)    | -498(7)  | 6369(4) | 23.2(15) |
| C14  | 8703(3)    | -197(7)  | 6003(4) | 22.4(15) |
| C15  | 8370(3)    | 707(7)   | 6317(3) | 17.5(13) |
| C16  | 8563(3)    | 2644(7)  | 8391(3) | 15.3(13) |
| C17  | 9099(3)    | 3430(7)  | 8674(4) | 20.2(14) |
| C18  | 9377(3)    | 3507(8)  | 9437(4) | 22.8(15) |
| C19  | 9116(3)    | 2830(7)  | 9925(4) | 22.1(15) |
| C20  | 8571(3)    | 2084(8)  | 9648(4) | 25.9(16) |
| C21  | 8297(3)    | 1990(7)  | 8893(4) | 21.8(14) |
| C22  | 6674(3)    | 4958(6)  | 7365(3) | 14.7(13) |
| C23  | 7084(3)    | 4812(7)  | 8086(3) | 15.5(13) |
| C24  | 7097(3)    | 5818(7)  | 8629(4) | 21.7(14) |
| C25  | 6713(3)    | 6975(7)  | 8466(4) | 21.5(14) |
| C26  | 6307(3)    | 7142(7)  | 7755(4) | 18.3(14) |
| C27  | 6290(3)    | 6139(7)  | 7211(3) | 16.2(13) |
| C28  | 5902(3)    | 3587(6)  | 6074(3) | 13.7(12) |
| C29  | 5429(3)    | 3485(6)  | 6414(3) | 14.8(13) |
| C30  | 4828(3)    | 3285(7)  | 5989(4) | 17.8(13) |
| C31  | 4679(3)    | 3181(7)  | 5216(4) | 20.4(14) |
| C32  | 5146(3)    | 3299(7)  | 4874(4) | 20.5(14) |
| C33  | 5750(3)    | 3492(6)  | 5295(3) | 16.5(13) |
| C34  | 8425(3)    | 4237(7)  | 7098(3) | 14.3(13) |
| C35  | 8303(3)    | 5614(6)  | 7343(4) | 17.8(13) |
| C36  | 8544(3)    | 6648(7)  | 6954(4) | 20.3(14) |
| C37  | 8826(3)    | 5933(7)  | 6476(4) | 18.9(14) |
| C38  | 8756(3)    | 4451(7)  | 6555(3) | 14.8(13) |
| C39  | 7025(3)    | 4746(6)  | 6029(3) | 13.8(12) |
| C40  | 7049(3)    | 6273(6)  | 5988(3) | 14.7(13) |
| C41  | 7325(3)    | 6624(7)  | 5423(3) | 18.7(14) |
| C42  | 7467(3)    | 5374(7)  | 5102(4) | 19.4(14) |
| C43  | 7288(3)    | 4208(7)  | 5462(3) | 14.6(13) |
| Cl1A | 9596.6(17) | 7669(5)  | 8541(2) | 38.9(9)  |
| Cl1B | 9734(2)    | 9716(5)  | 9262(3) | 49.2(11) |
| Cl2A | 8841(6)    | 7920(12) | 9536(7) | 52(3)    |
| Cl2B | 8889(7)    | 7451(15) | 9388(8) | 101(5)   |
| C44  | 9129(4)    | 8696(11) | 8844(5) | 49(2)    |

**Table S57.** Anisotropic Displacement Parameters ( $\text{\AA}^2 \times 10^3$ ) for **14**. The Anisotropic displacement factor exponent takes the form:  $-2\pi^2[h^2a^*U_{11}+2hka^*b^*U_{12}+\dots]$ .

| Atom | U <sub>11</sub> | U <sub>22</sub> | U <sub>33</sub> | U <sub>23</sub> | U <sub>13</sub> | U <sub>12</sub> |
|------|-----------------|-----------------|-----------------|-----------------|-----------------|-----------------|
| Br1  | 15.3(3)         | 13.1(3)         | 23.2(3)         | 3.5(3)          | 6.2(3)          | 1.7(2)          |
| Ni1  | 10.9(4)         | 10.6(4)         | 11.9(4)         | 1.1(3)          | 3.4(3)          | 0.6(3)          |
| Fe1  | 13.6(4)         | 13.0(4)         | 12.0(4)         | 1.6(4)          | 4.3(3)          | -0.1(3)         |
| P1   | 11.8(7)         | 12.5(8)         | 12.0(7)         | 1.2(6)          | 3.8(6)          | 1.5(6)          |
| P2   | 12.0(7)         | 12.3(8)         | 10.7(7)         | 0.0(6)          | 3.4(6)          | 0.4(6)          |
| C1   | 14(3)           | 9(3)            | 12(3)           | 2(2)            | 3(2)            | 2(2)            |
| C2   | 17(3)           | 10(3)           | 20(3)           | 4(2)            | 8(3)            | 3(2)            |
| C3   | 18(3)           | 14(3)           | 12(3)           | -1(2)           | 1(2)            | 0(3)            |
| C4   | 17(3)           | 14(3)           | 18(3)           | 2(3)            | 6(3)            | -3(2)           |
| C5   | 18(3)           | 15(3)           | 17(3)           | 3(3)            | 7(3)            | 3(3)            |
| C6   | 15(3)           | 15(3)           | 13(3)           | 2(2)            | 0(2)            | 3(2)            |
| C7   | 21(3)           | 20(3)           | 16(3)           | -4(3)           | 9(3)            | -3(3)           |
| C8   | 18(3)           | 32(4)           | 27(4)           | -6(3)           | 9(3)            | -9(3)           |
| C9   | 15(3)           | 22(3)           | 17(3)           | 2(3)            | 6(3)            | 0(3)            |
| C10  | 22(3)           | 12(3)           | 20(3)           | 1(3)            | 14(3)           | -3(3)           |
| C11  | 18(3)           | 23(4)           | 21(3)           | 0(3)            | 6(3)            | 4(3)            |
| C12  | 13(3)           | 30(4)           | 33(4)           | -1(3)           | 12(3)           | 3(3)            |
| C13  | 22(3)           | 20(3)           | 35(4)           | -2(3)           | 19(3)           | 1(3)            |
| C14  | 27(4)           | 23(4)           | 18(3)           | -4(3)           | 9(3)            | -8(3)           |
| C15  | 15(3)           | 19(3)           | 17(3)           | 1(3)            | 3(3)            | -1(3)           |
| C16  | 14(3)           | 20(3)           | 15(3)           | -1(3)           | 8(2)            | 5(3)            |
| C17  | 21(3)           | 24(4)           | 17(3)           | 0(3)            | 9(3)            | -2(3)           |
| C18  | 20(3)           | 32(4)           | 15(3)           | -4(3)           | 2(3)            | -6(3)           |
| C19  | 22(3)           | 27(4)           | 16(3)           | -2(3)           | 3(3)            | 2(3)            |
| C20  | 34(4)           | 28(4)           | 17(3)           | 4(3)            | 11(3)           | -3(3)           |
| C21  | 20(3)           | 24(4)           | 20(3)           | 1(3)            | 5(3)            | 1(3)            |
| C22  | 15(3)           | 12(3)           | 20(3)           | -1(2)           | 8(3)            | -6(2)           |
| C23  | 10(3)           | 19(3)           | 17(3)           | 1(3)            | 4(2)            | 0(2)            |
| C24  | 21(3)           | 29(4)           | 14(3)           | -6(3)           | 2(3)            | -9(3)           |
| C25  | 21(3)           | 24(4)           | 21(3)           | -7(3)           | 9(3)            | -3(3)           |
| C26  | 19(3)           | 15(3)           | 22(3)           | 0(3)            | 9(3)            | 0(3)            |
| C27  | 14(3)           | 18(3)           | 16(3)           | 3(3)            | 3(2)            | 0(2)            |
| C28  | 16(3)           | 10(3)           | 13(3)           | 0(2)            | 1(2)            | -2(2)           |
| C29  | 17(3)           | 12(3)           | 16(3)           | -1(2)           | 5(3)            | 2(2)            |
| C30  | 16(3)           | 13(3)           | 25(3)           | -1(3)           | 6(3)            | 1(3)            |
| C31  | 17(3)           | 12(3)           | 27(4)           | -1(3)           | -3(3)           | -1(3)           |
| C32  | 25(4)           | 16(3)           | 17(3)           | -3(3)           | 0(3)            | 0(3)            |
| C33  | 21(3)           | 10(3)           | 21(3)           | 0(3)            | 10(3)           | 1(3)            |
| C34  | 8(3)            | 17(3)           | 15(3)           | 0(2)            | 0(2)            | -3(2)           |

|      |          |         |          |          |          |          |
|------|----------|---------|----------|----------|----------|----------|
| C35  | 18(3)    | 14(3)   | 18(3)    | -2(3)    | 0(3)     | -5(3)    |
| C36  | 21(3)    | 17(3)   | 21(3)    | 1(3)     | 2(3)     | -5(3)    |
| C37  | 16(3)    | 21(3)   | 19(3)    | 2(3)     | 3(3)     | -6(3)    |
| C38  | 14(3)    | 20(3)   | 11(3)    | 2(3)     | 6(2)     | 1(3)     |
| C39  | 13(3)    | 13(3)   | 13(3)    | 2(2)     | 1(2)     | 6(2)     |
| C40  | 12(3)    | 12(3)   | 16(3)    | 1(2)     | -1(2)    | -2(2)    |
| C41  | 17(3)    | 18(3)   | 21(3)    | 6(3)     | 6(3)     | 5(3)     |
| C42  | 18(3)    | 23(3)   | 16(3)    | 2(3)     | 3(3)     | -1(3)    |
| C43  | 13(3)    | 16(3)   | 16(3)    | -3(2)    | 5(2)     | 0(2)     |
| Cl1A | 24.4(18) | 60(3)   | 27.9(19) | -3.7(18) | -0.2(15) | 13.8(18) |
| Cl1B | 43(2)    | 41(2)   | 51(3)    | 4(2)     | -7(2)    | 5.5(19)  |
| Cl2A | 58(4)    | 63(5)   | 49(5)    | 22(4)    | 37(4)    | 15(4)    |
| Cl2B | 100(10)  | 115(11) | 62(7)    | 45(7)    | -18(5)   | -49(7)   |
| C44  | 53(6)    | 54(6)   | 39(5)    | 18(4)    | 10(4)    | 3(5)     |

**Table S58.** Bond Lengths for **14**.

| Atom | Atom | Length/Å   | Atom | Atom | Length/Å  |
|------|------|------------|------|------|-----------|
| Br1  | Ni1  | 2.3291(9)  | C14  | C15  | 1.366(9)  |
| Ni1  | C1   | 1.906(6)   | C16  | C17  | 1.379(9)  |
| Ni1  | P2   | 2.1573(17) | C16  | C21  | 1.382(9)  |
| Ni1  | P1   | 2.2460(17) | C17  | C18  | 1.371(9)  |
| Fe1  | C39  | 2.001(6)   | C18  | C19  | 1.364(9)  |
| Fe1  | C43  | 2.008(6)   | C19  | C20  | 1.374(9)  |
| Fe1  | C34  | 2.010(6)   | C20  | C21  | 1.357(9)  |
| Fe1  | C35  | 2.010(6)   | C22  | C27  | 1.381(9)  |
| Fe1  | C40  | 2.024(6)   | C22  | C23  | 1.393(8)  |
| Fe1  | C38  | 2.027(6)   | C23  | C24  | 1.370(9)  |
| Fe1  | C42  | 2.029(6)   | C24  | C25  | 1.364(10) |
| Fe1  | C41  | 2.032(6)   | C25  | C26  | 1.376(9)  |
| Fe1  | C36  | 2.033(6)   | C26  | C27  | 1.368(9)  |
| Fe1  | C37  | 2.043(6)   | C28  | C33  | 1.383(8)  |
| P1   | C34  | 1.791(6)   | C28  | C29  | 1.384(8)  |
| P1   | C10  | 1.811(6)   | C29  | C30  | 1.366(8)  |
| P1   | C16  | 1.819(6)   | C30  | C31  | 1.376(9)  |
| P2   | C39  | 1.789(6)   | C31  | C32  | 1.375(9)  |
| P2   | C22  | 1.799(6)   | C32  | C33  | 1.367(9)  |
| P2   | C28  | 1.810(6)   | C34  | C35  | 1.419(9)  |
| C1   | C2   | 1.378(8)   | C34  | C38  | 1.423(8)  |
| C1   | C6   | 1.394(8)   | C35  | C36  | 1.404(9)  |
| C2   | C3   | 1.376(8)   | C36  | C37  | 1.395(9)  |
| C2   | C7   | 1.501(8)   | C37  | C38  | 1.410(9)  |
| C3   | C4   | 1.375(8)   | C39  | C40  | 1.434(8)  |

|     |     |           |      |     |           |
|-----|-----|-----------|------|-----|-----------|
| C4  | C5  | 1.380(9)  | C39  | C43 | 1.435(8)  |
| C4  | C8  | 1.489(8)  | C40  | C41 | 1.398(9)  |
| C5  | C6  | 1.377(9)  | C41  | C42 | 1.389(9)  |
| C6  | C9  | 1.505(8)  | C42  | C43 | 1.396(9)  |
| C10 | C11 | 1.374(9)  | Cl1A | C44 | 1.636(10) |
| C10 | C15 | 1.383(9)  | Cl1B | C44 | 1.658(11) |
| C11 | C12 | 1.390(9)  | Cl2A | C44 | 1.748(14) |
| C12 | C13 | 1.357(10) | Cl2B | C44 | 1.724(17) |
| C13 | C14 | 1.382(9)  |      |     |           |

**Table S59.** Bond Angles for **14**.

| Atom | Atom | Atom | Angle/°    | Atom | Atom | Atom | Angle/°  |
|------|------|------|------------|------|------|------|----------|
| C1   | Ni1  | P2   | 85.61(18)  | C5   | C6   | C1   | 119.3(6) |
| C1   | Ni1  | P1   | 173.65(18) | C5   | C6   | C9   | 119.3(5) |
| P2   | Ni1  | P1   | 100.11(6)  | C1   | C6   | C9   | 121.3(5) |
| C1   | Ni1  | Br1  | 85.56(17)  | C11  | C10  | C15  | 119.2(6) |
| P2   | Ni1  | Br1  | 170.92(6)  | C11  | C10  | P1   | 123.1(5) |
| P1   | Ni1  | Br1  | 88.82(5)   | C15  | C10  | P1   | 117.7(5) |
| C39  | Fe1  | C43  | 41.9(2)    | C10  | C11  | C12  | 120.2(6) |
| C39  | Fe1  | C34  | 107.3(2)   | C13  | C12  | C11  | 120.3(6) |
| C43  | Fe1  | C34  | 113.0(2)   | C12  | C13  | C14  | 119.5(6) |
| C39  | Fe1  | C35  | 110.0(2)   | C15  | C14  | C13  | 120.7(6) |
| C43  | Fe1  | C35  | 142.5(2)   | C14  | C15  | C10  | 120.1(6) |
| C34  | Fe1  | C35  | 41.3(2)    | C17  | C16  | C21  | 118.6(6) |
| C39  | Fe1  | C40  | 41.7(2)    | C17  | C16  | P1   | 121.0(5) |
| C43  | Fe1  | C40  | 69.4(2)    | C21  | C16  | P1   | 120.3(5) |
| C34  | Fe1  | C40  | 133.6(2)   | C18  | C17  | C16  | 120.5(6) |
| C35  | Fe1  | C40  | 107.1(3)   | C19  | C18  | C17  | 120.1(6) |
| C39  | Fe1  | C38  | 135.9(2)   | C18  | C19  | C20  | 119.7(6) |
| C43  | Fe1  | C38  | 111.8(2)   | C21  | C20  | C19  | 120.6(6) |
| C34  | Fe1  | C38  | 41.3(2)    | C20  | C21  | C16  | 120.5(6) |
| C35  | Fe1  | C38  | 68.7(3)    | C27  | C22  | C23  | 118.5(6) |
| C40  | Fe1  | C38  | 174.8(2)   | C27  | C22  | P2   | 121.7(5) |
| C39  | Fe1  | C42  | 69.2(2)    | C23  | C22  | P2   | 119.5(5) |
| C43  | Fe1  | C42  | 40.5(2)    | C24  | C23  | C22  | 120.2(6) |
| C34  | Fe1  | C42  | 144.7(3)   | C25  | C24  | C23  | 120.3(6) |
| C35  | Fe1  | C42  | 173.9(3)   | C24  | C25  | C26  | 120.3(6) |
| C40  | Fe1  | C42  | 68.1(3)    | C27  | C26  | C25  | 119.7(6) |
| C38  | Fe1  | C42  | 116.3(2)   | C26  | C27  | C22  | 121.0(6) |
| C39  | Fe1  | C41  | 69.2(2)    | C33  | C28  | C29  | 118.4(6) |
| C43  | Fe1  | C41  | 68.2(3)    | C33  | C28  | P2   | 120.9(5) |
| C34  | Fe1  | C41  | 173.6(2)   | C29  | C28  | P2   | 120.5(4) |



|     |     |     |          |      |     |      |          |
|-----|-----|-----|----------|------|-----|------|----------|
| C35 | Fe1 | C41 | 133.9(3) | C30  | C29 | C28  | 120.6(6) |
| C40 | Fe1 | C41 | 40.3(2)  | C29  | C30 | C31  | 120.8(6) |
| C38 | Fe1 | C41 | 144.8(2) | C32  | C31 | C30  | 118.9(6) |
| C42 | Fe1 | C41 | 40.0(3)  | C33  | C32 | C31  | 120.6(6) |
| C39 | Fe1 | C36 | 140.1(3) | C32  | C33 | C28  | 120.7(6) |
| C43 | Fe1 | C36 | 176.9(3) | C35  | C34 | C38  | 106.5(5) |
| C34 | Fe1 | C36 | 69.3(2)  | C35  | C34 | P1   | 127.1(5) |
| C35 | Fe1 | C36 | 40.6(2)  | C38  | C34 | P1   | 126.4(5) |
| C40 | Fe1 | C36 | 110.7(3) | C35  | C34 | Fe1  | 69.3(4)  |
| C38 | Fe1 | C36 | 68.4(3)  | C38  | C34 | Fe1  | 70.0(3)  |
| C42 | Fe1 | C36 | 136.5(3) | P1   | C34 | Fe1  | 123.5(3) |
| C41 | Fe1 | C36 | 109.7(3) | C36  | C35 | C34  | 109.0(6) |
| C39 | Fe1 | C37 | 176.1(3) | C36  | C35 | Fe1  | 70.6(4)  |
| C43 | Fe1 | C37 | 138.2(2) | C34  | C35 | Fe1  | 69.3(3)  |
| C34 | Fe1 | C37 | 68.8(2)  | C37  | C36 | C35  | 107.7(6) |
| C35 | Fe1 | C37 | 67.8(3)  | C37  | C36 | Fe1  | 70.4(4)  |
| C40 | Fe1 | C37 | 141.6(3) | C35  | C36 | Fe1  | 68.8(4)  |
| C38 | Fe1 | C37 | 40.5(2)  | C36  | C37 | C38  | 108.8(6) |
| C42 | Fe1 | C37 | 113.3(3) | C36  | C37 | Fe1  | 69.6(4)  |
| C41 | Fe1 | C37 | 114.8(3) | C38  | C37 | Fe1  | 69.1(3)  |
| C36 | Fe1 | C37 | 40.0(3)  | C37  | C38 | C34  | 107.9(5) |
| C34 | P1  | C10 | 100.2(3) | C37  | C38 | Fe1  | 70.4(4)  |
| C34 | P1  | C16 | 99.6(3)  | C34  | C38 | Fe1  | 68.7(3)  |
| C10 | P1  | C16 | 105.6(3) | C40  | C39 | C43  | 106.3(5) |
| C34 | P1  | Ni1 | 125.6(2) | C40  | C39 | P2   | 127.3(5) |
| C10 | P1  | Ni1 | 110.5(2) | C43  | C39 | P2   | 126.3(5) |
| C16 | P1  | Ni1 | 113.1(2) | C40  | C39 | Fe1  | 70.0(3)  |
| C39 | P2  | C22 | 102.9(3) | C43  | C39 | Fe1  | 69.3(3)  |
| C39 | P2  | C28 | 100.4(3) | P2   | C39 | Fe1  | 127.2(3) |
| C22 | P2  | C28 | 102.9(3) | C41  | C40 | C39  | 107.8(6) |
| C39 | P2  | Ni1 | 117.0(2) | C41  | C40 | Fe1  | 70.2(4)  |
| C22 | P2  | Ni1 | 112.1(2) | C39  | C40 | Fe1  | 68.3(3)  |
| C28 | P2  | Ni1 | 119.2(2) | C42  | C41 | C40  | 109.0(6) |
| C2  | C1  | C6  | 118.8(5) | C42  | C41 | Fe1  | 69.9(4)  |
| C2  | C1  | Ni1 | 119.0(4) | C40  | C41 | Fe1  | 69.5(3)  |
| C6  | C1  | Ni1 | 122.1(4) | C41  | C42 | C43  | 108.9(6) |
| C3  | C2  | C1  | 120.2(6) | C41  | C42 | Fe1  | 70.1(4)  |
| C3  | C2  | C7  | 119.5(6) | C43  | C42 | Fe1  | 69.0(3)  |
| C1  | C2  | C7  | 120.2(5) | C42  | C43 | C39  | 108.0(5) |
| C4  | C3  | C2  | 121.9(6) | C42  | C43 | Fe1  | 70.6(4)  |
| C3  | C4  | C5  | 117.3(6) | C39  | C43 | Fe1  | 68.8(3)  |
| C3  | C4  | C8  | 121.4(6) | Cl1B | C44 | Cl2B | 118.0(7) |

C5 C4 C8 121.2(6) C11A C44 C12A 114.5(6)  
C6 C5 C4 122.2(6)

## SVIII. References

1. Harris, R.; Becker, E.; Cabral De Menezes, S.; Granger, P.; Hoffman, R.; Zilm, K. *Pure Appl. Chem.* **2008**, *46*, 582-598.
2. (a) Quasdorf, K. W.; Antoft-Finch, A.; Liu, P.; Silberstein, A. L.; Komaromi, A.; Blackburn, T.; Ramgren, S. D.; Houk, K. N.; Snieckus, V.; Garg, N. K. *J. Am. Chem. Soc.* **2011**, *133*, 6352-6363; (b) Quasdorf, K. W.; Riener, M.; Petrova, K. V.; Garg, N. K. *J. Am. Chem. Soc.* **2009**, *131*, 17748-17749.
3. Tasker, S. Z.; Standley, E. A.; Jamison, T. F. *Nature* **2014**, *509*, 299.
4. Mohadjer Beromi, M.; Banerjee, G.; Brudvig, G. W.; Hazari, N.; Mercado, B. Q. *ACS Catal.* **2018**, *8*, 2526-2533.
5. Jin, D.; Schmeier, T. J.; Williard, P. G.; Hazari, N.; Bernskoetter, W. H. *Organometallics* **2013**, *32*, 2152-2159.
6. Mohadjer Beromi, M.; Nova, A.; Balcells, D.; Brasacchio, A. M.; Brudvig, G. W.; Guard, L. M.; Hazari, N.; Vinyard, D. J. *J Am Chem Soc* **2017**, *139*, 922-936.
7. Falivene, L.; Credendino, R.; Poater, A.; Petta, A.; Serra, L.; Oliva, R.; Scarano, V.; Cavallo, L. *Organometallics* **2016**, *35*, 2286-2293.
8. Park, N. H.; Teverovskiy, G.; Buchwald, S. L. *Org. Lett.* **2014**, *16*, 220-223.
9. (a) Hammett, L. P. *J. Am. Chem. Soc.* **1937**, *59*, 96-103; (b) Hansch, C.; Leo, A.; Taft, R. W. *Chem. Rev.* **1991**, *91*, 165-195.
10. Magano, J.; Monfette, S. *ACS Catal.* **2015**, *5*, 3120-3123.
11. Sheldrick, G. M. *Acta Cryst.* **2008**, *A64*, 112-122.
